# Supplementary material for: HSAB theory guiding electrophilic substitution reactions of o-carborane
Source: Royal Society of Chemistry journal article supplement (doi:10.1039/d4qo01546k), 2024-10-26

## Supporting Information

### HSAB Theory Guiding Electrophilic Substitution Reactions of *o*-Carborane

Yan Wang,<sup>a</sup> Yi-Ge Li,<sup>a</sup> Feijing Chen,<sup>a</sup> Yan-Na Ma<sup>\*a</sup> and Xuenian Chen<sup>\*a,b</sup>

<sup>a</sup> College of Chemistry, Zhengzhou University, Zhengzhou, Henan 450001 (China)

<sup>b</sup> School of Chemistry and Chemical Engineering, Henan Key Laboratory of Boron Chemistry and Advanced Materials, Henan Normal University, Xinxiang, Henan 453007 (China)

E-mail: [mayanna@zzu.edu.cn](mailto:mayanna@zzu.edu.cn); [xuenian\\_chen@zzu.edu.cn](mailto:xuenian_chen@zzu.edu.cn).

## Table of Contents

|                                       |     |
|---------------------------------------|-----|
| 1. General Information.....           | S1  |
| 2. Experimental Section .....         | S1  |
| 3. Characterization data.....         | S10 |
| 4. References.....                    | S17 |
| 5. X-ray Structure Determination..... | S17 |
| 6. NMR Spectra.....                   | S20 |

## 1. General Information

$^1\text{H}$ ,  $^{13}\text{C}$ ,  $^{11}\text{B}$  and  $^{19}\text{F}$  NMR spectra were recorded on Bruker Advance III600 (400) spectrometer at 600 (400), 151 (101), 193 (128) and 565 (377) MHz, respectively. All chemical shifts were reported in  $\delta$  units with references to the residual solvent resonances of the deuterated solvents for proton and carbon chemical shifts, and to external  $\text{BF}_3\cdot\text{OEt}_2$  (0.00 ppm) for boron chemical shifts. High Resolution Mass Spectra (HRMS (ESI-TOF)) were recorded on an Bruker Mass spectrometer using ESI-TOF (electrospray ionization-time of flight). GC-MS analyses were performed on SHIMADZU GCMS-QP 2020. Starting *o*-carborane and *m*-carborane were purchased from Zhengzhou Yuanli technology. All other chemicals were purchased from Aldrich, Acros Organics, J&K Chemicals, Energy Chemical, Aladdin, Macklin or TCI and used without further purification. TLC samples for carborane-containing compounds were stained with 1 wt.%  $\text{PdCl}_2$  in 6 M HCl and were developed with high heat using a heat gun.

## 2. Experimental Section

### 2.1 Comparison of electrophilic substitution reactions between *o*-carborane and benzene

#### (a) Catalyst-free electrophilic halogenation.

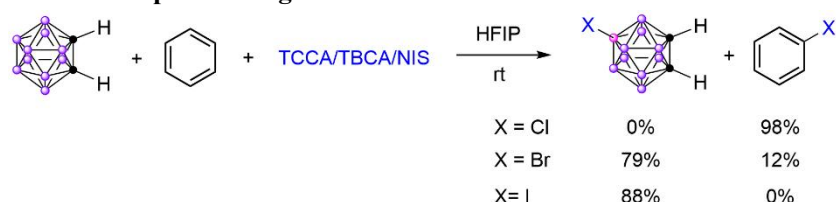

**General procedure:** *o*-Carborane (2.0 equiv, 0.40 mmol) and electrophile TCCA (0.067 mmol), TBCA (0.067 mmol) or NIS (0.02 mmol) were mixed in HFIP (4.0 mL). Then to this solution was added benzene (2.0 equiv, 0.4 mmol) and the resulting mixture was stirred in a closed flask at ambient temperature for 12 h under air atmosphere. Then, the reaction solution was monitored by  $^{11}\text{B}$  NMR and  $^1\text{H}$  NMR spectroscopy to gain the product yield.

#### (b) HOTf-promoted electrophilic halogenation.

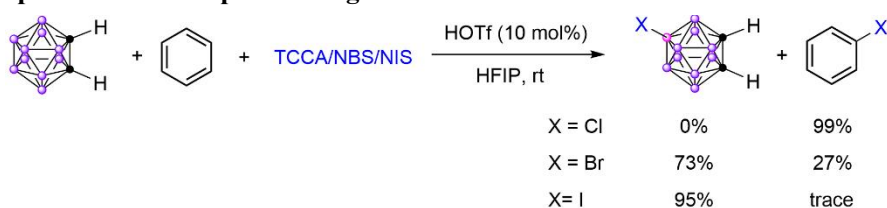

**General procedure:** *o*-Carborane (2.0 equiv, 0.40 mmol) and electrophile TCCA (0.067 mmol), TBCA (0.067 mmol) or NIS (0.02 mmol) were mixed in HFIP (4.0 mL). Then to this solution was added benzene (2.0 equiv, 0.40 mmol), HOTf (10 mol%) and the resulting mixture was stirred in a closed flask at ambient temperature for 12 h under air atmosphere. Then, the reaction solution was monitored by  $^{11}\text{B}$  NMR and  $^1\text{H}$  NMR spectroscopy to gain the product yield.

#### (c) Electrophilic nitration.

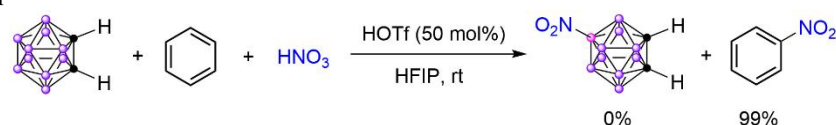

**General procedure:** Benzene (2.0 equiv, 0.40 mmol), 68%  $\text{HNO}_3$  (1.0 equiv, 0.20 mmol) and

HOTf (50 mol%) were successively added to the solution of *o*-carborane (2.0 equiv, 0.40 mmol) in HFIP (4.0 mL). The resulting mixture was stirred in a closed flask at ambient temperature for 12 h under air atmosphere. Then, the reaction solution was monitored by  $^{11}\text{B}$  NMR and  $^1\text{H}$  NMR spectroscopy to gain the product yield.

#### (d) Electrophilic amination.

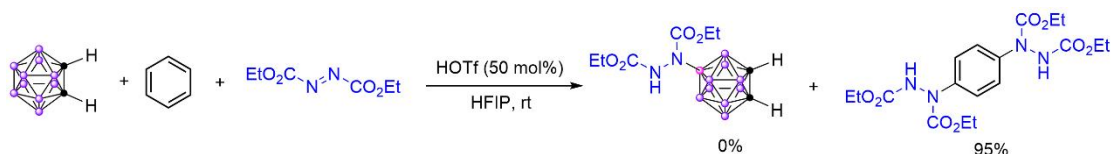

**General procedure:** Benzene (2.0 equiv, 0.40 mmol), DEAD (1.0 equiv, 0.20 mmol), HOTf (50 mol%) were successively added to the solution of *o*-carborane (2.0 equiv, 0.40 mmol) in HFIP (4.0 mL). The resulting mixture was stirred in a closed flask at ambient temperature for 12 h under air atmosphere. Then, the reaction solution was monitored by  $^{11}\text{B}$  NMR and  $^1\text{H}$  NMR spectroscopy to gain the product yield.

#### (e) Friedel-Crafts alkylation.

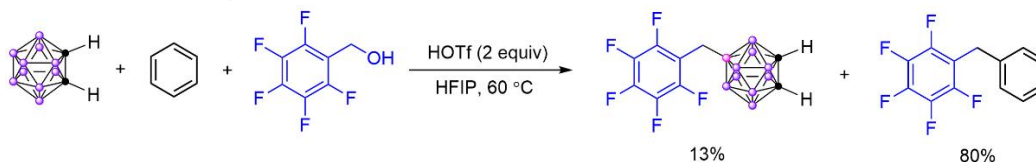

**General procedure:** *o*-Carborane (2.0 equiv, 0.40 mmol) and 2,3,4,5,6-pentafluorobenzyl alcohol (1.0 equiv, 0.20 mmol) were mixed in HFIP (4.0 mL). Then to this solution was added benzene (2.0 equiv, 0.40 mmol), HOTf (2.0 equiv, 0.40 mmol) and the resulting mixture was stirred in a closed flask at 60 °C for 12 h under air atmosphere. Then, the reaction solution was monitored by  $^{11}\text{B}$  NMR and  $^1\text{H}$  NMR spectroscopy to gain the product yield.

## 2.2 Electrophilic chalcogenation/Friedel-Crafts acylation/sulfonylation

### (a) Electrophilic chalcogenation <sup>[1]</sup>

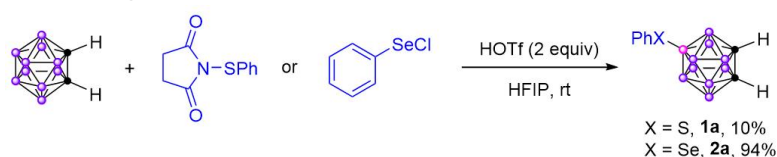

**General procedure:** *o*-Carborane (1.0 equiv, 0.20 mmol) and 1-(phenylthio)pyrrolidine-2,5-dione or phenylselenenyl chloride (2.0 equiv, 0.40 mmol) were mixed in HFIP (2.0 mL). Then to this solution was added HOTf (2.0 equiv, 0.40 mmol) and the resulting mixture was stirred in a closed flask at ambient temperature for 12 h under air atmosphere. After the reaction was completed, the solution was portioned between EtOAc and saturated aqueous  $\text{NaHCO}_3$ . The organic portions were combined. Then removal of organic solvents under reduced pressure, the residue was subjected to flash column chromatography on silica gel (200-300 mesh) to give the product.

### (b) Competing experiments towards electrophilic chalcogenation

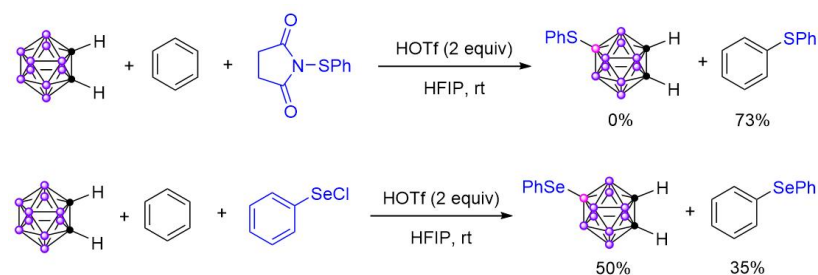

**General procedure:** *o*-Carborane (2.0 equiv, 0.40 mmol) and electrophiles (1.0 equiv, 0.20 mmol) were mixed in HFIP (4.0 mL). Then to this solution was added benzene (2.0 equiv, 0.40 mmol), HOFt (2.0 equiv, 0.40 mmol) and the resulting mixture was stirred in a closed flask at ambient temperature for 12 h under air atmosphere. The reaction solution was monitored by  $^{11}\text{B}$  NMR and  $^1\text{H}$  NMR spectroscopy to gain the product yield.

**(c) Friedel-Crafts acylation of benzene.** <sup>[2]</sup>

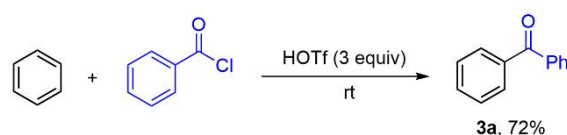

**General procedure:** Benzene (1.0 equiv, 0.20 mmol) and benzoyl chloride (2.0 equiv, 0.4 mmol) were mixed in a glass tube, then HOFt (3.0 equiv, 0.60 mmol) was carefully and slowly added, the reaction was stirred at ambient temperature for 12 h under air atmosphere. 1 mL of EtOAc was added to the reaction tube for dilution, then saturated aqueous  $\text{NaHCO}_3$  was added to neutralize to  $\text{pH} = 6 - 7$ , and then extracted with EtOAc (20 mL  $\times$  3). The organic phase was collected and dried with  $\text{Na}_2\text{SO}_4$ . Then removal of organic solvents under reduced pressure, the residue was subjected to flash column chromatography on silica gel (200-300 mesh) to give the product **3a**.

**(d) Friedel-Crafts acylation of *o*-carborane.**

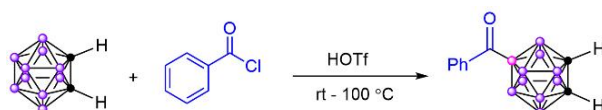

**General procedure:** *o*-Carborane (1.0 equiv, 0.20 mmol) was mixed in HOFt (1.0 mL). Then to this solution was added benzoyl chloride (2.0 equiv, 0.40 mmol) and the resulting mixture was stirred in a closed flask at ambient temperature for 12 h under air atmosphere. After the reaction solution was portioned between EtOAc and saturated aqueous  $\text{NaHCO}_3$ . The organic portions were combined. No product was detected by  $^{11}\text{B}$  NMR and GC-MS.

**(e) Electrophilic sulfonylation of benzene.** <sup>[3]</sup>

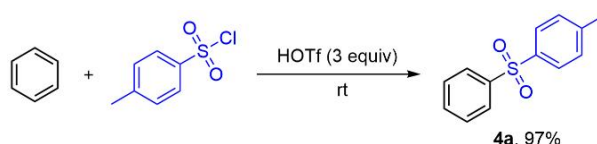

**General procedure:** Benzene (1.0 equiv, 0.20 mmol) and tosyl chloride (2.0 equiv, 0.4 mmol) were weighed into a glass reaction tube, then HOFt (3.0 equiv, 0.60 mmol) was carefully and slowly added, the reaction was stirred at ambient temperature for 12 h under air atmosphere. 1 mL of EtOAc was added to the reaction tube for dilution, then saturated aqueous  $\text{NaHCO}_3$  was added to neutralize to  $\text{pH} = 6 - 7$ , and then extracted with EtOAc (20 mL  $\times$  3). The organic phase was

collected and dried with Na<sub>2</sub>SO<sub>4</sub>. Then removal of organic solvents under reduced pressure, the residue was subjected to flash column chromatography on silica gel (200-300 mesh) to give the product **4a**.

**(f) Electrophilic sulfonylation of *o*-carborane.**

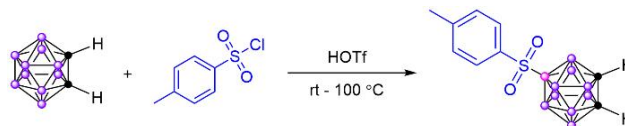

**General procedure:** *o*-Carborane (1.0 equiv, 0.20 mmol) was mixed in HOTf (1.0 mL). Then to this solution was added tosyl chloride (2.0 equiv, 0.4 mmol) and the resulting mixture was stirred in a closed flask at ambient temperature for 12 h under air atmosphere. After the reaction solution was portioned between EtOAc and saturated aqueous NaHCO<sub>3</sub>. The organic portions were combined. No product was detected by <sup>11</sup>B NMR and GC-MS.

**2.3 Electrophilic metallization**

**(a) Electrophilic thallation of *o*-carborane** <sup>[4]</sup>

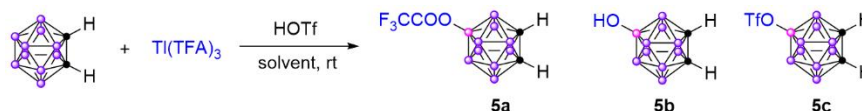

**General procedure:** *o*-Carborane (1.0 equiv, 0.20 mmol) and thallium(III) trifluoroacetate (2.0 equiv, 0.40 mmol) were mixed in HFIP or TFA (2.0 mL). Then to this solution was added HOTf (6.0 equiv, 1.20 mmol) and the resulting mixture was stirred in a closed flask at ambient temperature for 12 h under air atmosphere. After the reaction solution was portioned between EtOAc and saturated aqueous NaHCO<sub>3</sub>. The organic portions were combined. Then removal of organic solvents under reduced pressure, the residue was subjected to flash column chromatography on silica gel (200-300 mesh) to give the product **5a**, **5b** and **5c**.

**(b) Electrophilic auration of *o*-carborane** <sup>[5]</sup>

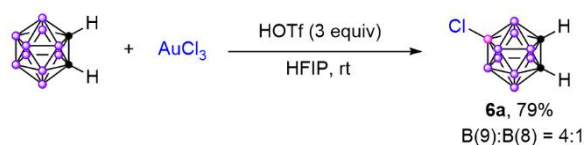

**General procedure:** *o*-Carborane (1.0 equiv, 0.20 mmol) and AuCl<sub>3</sub> (2.0 equiv, 0.40 mmol) were mixed in HFIP (2.0 mL). Then to this solution was added HOTf (3.0 equiv, 0.60 mmol) and the resulting mixture was stirred in a closed flask at ambient temperature for 12 h under air atmosphere. After the reaction solution was portioned between EtOAc and saturated aqueous NaHCO<sub>3</sub>. The organic portions were combined. Then removal of organic solvents under reduced pressure, the residue was subjected to flash column chromatography on silica gel (200-300 mesh) to give the product **6a**.

**(c) Competing experiment towards electrophilic auration.**

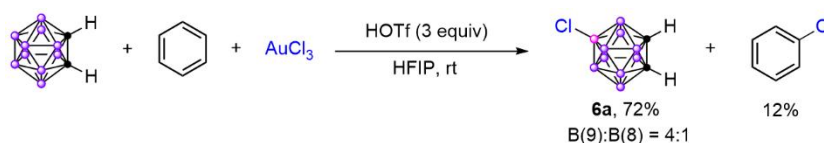

**General procedure:** *o*-Carborane (2.0 equiv, 0.40 mmol) and AuCl<sub>3</sub> (1.0 equiv, 0.20 mmol) were mixed in HFIP (4.0 mL). Then to this solution was added benzene (2.0 equiv, 0.40 mmol), HOTf (3.0 equiv, 0.60 mmol) and the resulting mixture was stirred in a closed flask at ambient temperature for 12 h under air atmosphere. Then, the reaction solution was monitored by <sup>11</sup>B NMR and <sup>1</sup>H NMR spectroscopy to gain the product yield.

**(d) Electrophilic mercuration of *o*-carborane.**

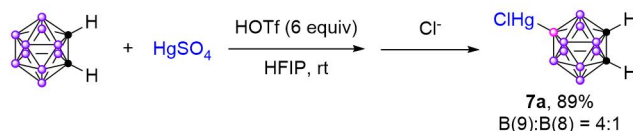

**General procedure:** *o*-Carborane (1.0 equiv, 0.20 mmol) and HgSO<sub>4</sub> (2.0 equiv, 0.40 mmol) were mixed in HFIP (2.0 mL). Then to this solution was added HOTf (6.0 equiv, 1.20 mmol) and the resulting mixture was stirred in a closed flask at ambient temperature for 12 h under air atmosphere. After the reaction solution was portioned between EtOAc and saturated aqueous NaHCO<sub>3</sub>. The organic portions were combined. Then removal of organic solvents under reduced pressure, the residue was subjected to flash column chromatography on silica gel (200-300 mesh) to give the product **7a**.

**2.4 Pd(II)-catalyzed B(9)-functionalization of *o*-carborane**

**(a) Pd(II)-catalyzed B(9)-halogenation of *o*-carborane** <sup>[5]</sup>

**Table S1.** B(9)-halogenation of *o*-carborane.<sup>a</sup>

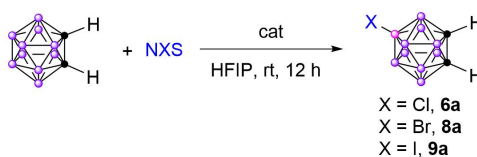

| entry | NXS (1.0 equiv) | Cat (10 mol%)        | Yield (%)               |
|-------|-----------------|----------------------|-------------------------|
| 1     | NCS             | w/o                  | n.r.                    |
| 2     | NCS             | Pd(OAc) <sub>2</sub> | 36 (trace) <sup>b</sup> |
| 3     | NBS             | w/o                  | 26                      |
| 4     | NBS             | Pd(OAc) <sub>2</sub> | 69 (6) <sup>b</sup>     |
| 5     | NIS             | w/o                  | 74                      |
| 6     | NIS             | Pd(OAc) <sub>2</sub> | 71 (13) <sup>b</sup>    |

[a] reaction conditions: *o*-carborane (0.2 mmol), NXS (0.2 mmol) in 2 mL HFIP was stirred at room temperature for 12 hours. [b] yields of the dihalogenated products.

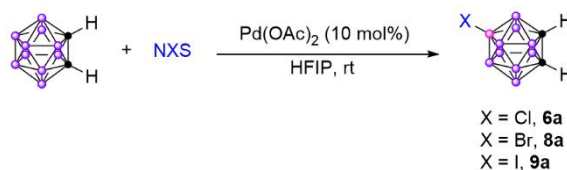

**General procedure:** *o*-Carborane (1.0 equiv, 0.20 mmol), NXS (2.0 equiv, 0.40 mmol) and Pd(OAc)<sub>2</sub> (10 mol%) were mixed in HFIP (2.0 mL). Then the resulting mixture was stirred in a

closed flask at ambient temperature for 12 h under air atmosphere. After the reaction solution was portioned between EtOAc and saturated aqueous NaHCO<sub>3</sub>. The organic portions were combined. Then removal of organic solvents under reduced pressure, the residue was subjected to flash column chromatography on silica gel (200-300 mesh) to give the product **6a/8a/9a**.

**(b) Comparison of Pd(II)-catalyzed B-H/C-H halogenation of *o*-carborane and benzene**

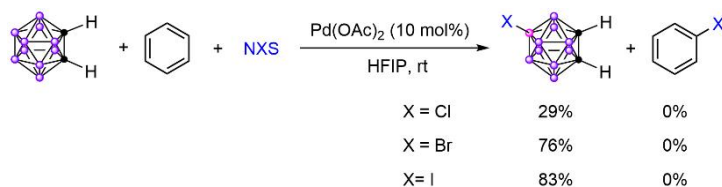

**General procedure:** *o*-Carborane (2.0 equiv, 0.40 mmol), NXS (1.0 equiv, 0.20 mmol) and Pd(OAc)<sub>2</sub> (10 mol%) were mixed in HFIP (4.0 mL). Then to this solution was added benzene (2.0 equiv, 0.40 mmol) and the resulting mixture was stirred in a closed flask at ambient temperature for 12 h under air atmosphere. Then, the reaction solution was monitored by <sup>11</sup>B NMR and <sup>1</sup>H NMR spectroscopy to gain the product yield.

**(c) Pd(II)-catalyzed B(9)-thiolation of *o*-carborane**

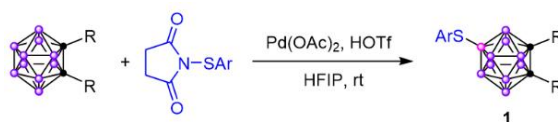

**General procedure:** *o*-Carborane (1.0 equiv, 0.20 mmol), the sulfur reagent (1.5 equiv, 0.30 mmol) and Pd(OAc)<sub>2</sub> (10 mol%) were mixed in HFIP (2.0 mL). Then to this solution was added HOTf (1.0 equiv, 0.20 mmol) and the resulting mixture was stirred in a closed flask at ambient temperature or 60°C for 12 h – 24 h under air atmosphere. After the reaction solution was portioned between EtOAc and saturated aqueous NaHCO<sub>3</sub>. The organic portions were combined. Then removal of organic solvents under reduced pressure, the residue was subjected to flash column chromatography on silica gel (200-300 mesh) to give the product **1a-1k**.

**Table S2.** Scope of Pd(II)-catalyzed B(9)-thiolation of *o*-carborane.<sup>a</sup>



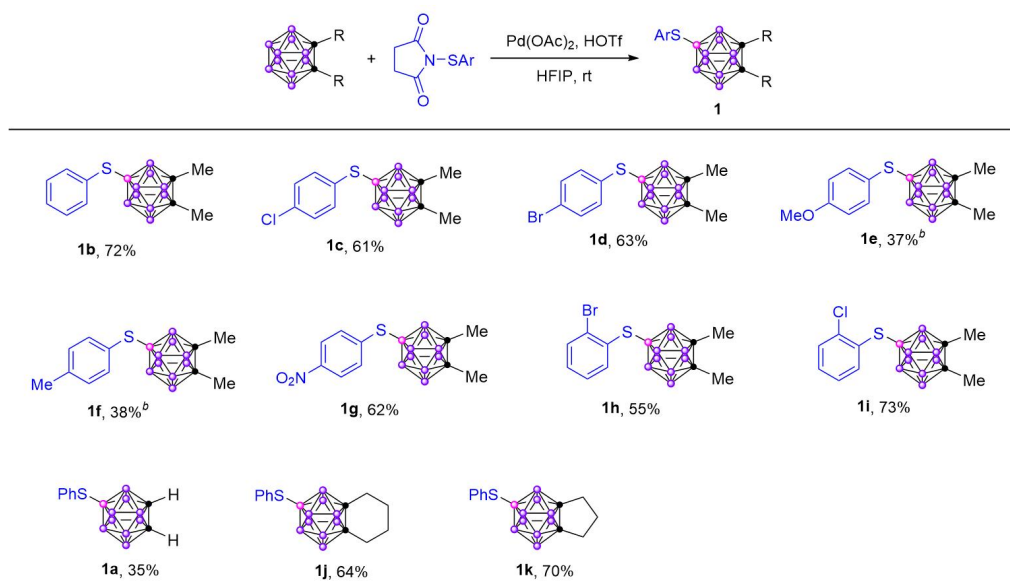

[a] Reaction conditions: carboranes (0.2 mmol, 1.0 equiv), arylthiolation reagent (0.3 mmol, 1.5 equiv), Pd(OAc)<sub>2</sub> (10 mol%) and HOTf (0.2 mmol, 1.0 equiv) in HFIP (2 mL) at room temperature under an air atmosphere. [b] At 60 °C for 24 hours.

**(d) Comparison of Pd(II)-catalyzed B-H/C-H thiolation of *o*-carborane and benzene**

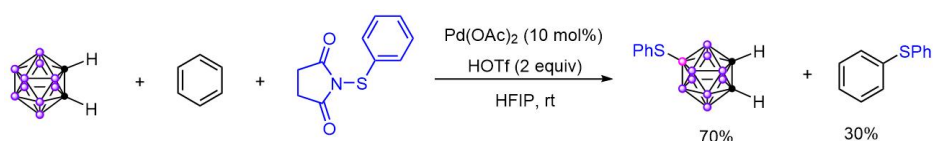

**General procedure:** *o*-Carborane (2.0 equiv, 0.40 mmol), 1-(phenylthio)pyrrolidine-2,5-dione (1.0 equiv, 0.20 mmol) and Pd(OAc)<sub>2</sub> (10 mol%) were mixed in HFIP (4.0 mL). Then to this solution was added benzene (2.0 equiv, 0.40 mmol), HOTf (2.0 equiv, 0.40 mmol) and the resulting mixture was stirred in a closed flask at ambient temperature for 12 h under air atmosphere. Then, the reaction solution was monitored by <sup>11</sup>B NMR and <sup>1</sup>H NMR spectroscopy to gain the product yield.

**(e) Proposed mechanism for Pd(II)-catalyzed B(9)-H halogenation/thiolation of *o*-carborane**

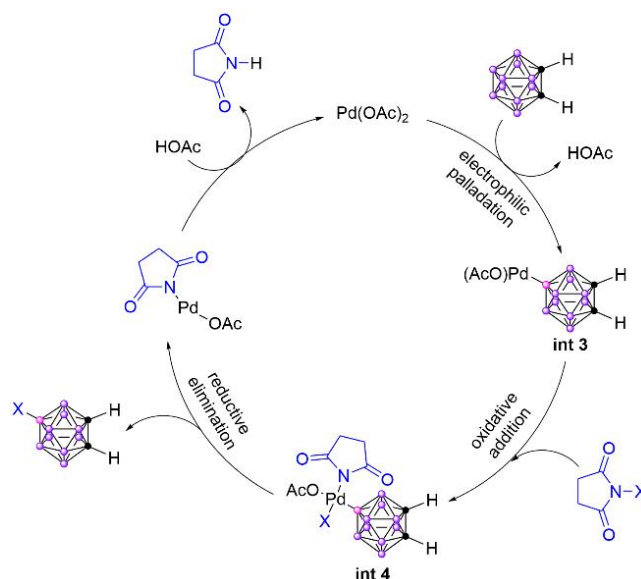

**Scheme S1.** The plausible mechanism of Pd(II)-catalyzed B(9)-halogenation of *o*-carborane

Based on the experiment results and our previous mechanism studies, a plausible mechanism of Pd(II)-catalyzed B(9)-halogenation and thiolation of *o*-carborane is proposed, as shown in **Scheme S1**. We consider that the first step in the catalytic cycle is the formation of B–Pd intermediate **int 3** through electrophilic palladation process. Then the halogenating reagent oxidative addition occurs to form the Pd(IV) intermediate **int 4**. B–X reductive elimination from **int 4** produces the target product, meanwhile the catalyst palladium is reduced from the Pd(IV) to the Pd(II), entering the catalytic cycle.

**(f) Pd(II)-catalyzed B(9)-amination of *o*-carborane** [6]

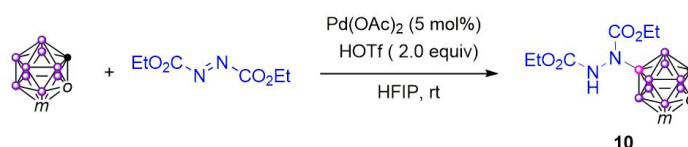

**General procedure:** *o/m*-Carborane (1.0 equiv, 0.20 mmol), DEAD (1.1 equiv, 0.22 mmol) and Pd(OAc)<sub>2</sub> (5 mol%) were mixed in HFIP (2.0 mL). Then to this solution was added HOTf (1.0 equiv, 0.20 mmol) and the resulting mixture was stirred in a closed flask at ambient temperature for 12 h under air atmosphere. After the reaction solution was portioned between EtOAc and saturated aqueous NaHCO<sub>3</sub>. The organic portions were combined. Then removal of organic solvents under reduced pressure, the residue was subjected to flash column chromatography on silica gel (200-300 mesh) to give the product (**10a-10j**).

**Table S3.** Selective B(9)-amination of *o*-carborane.<sup>a</sup>

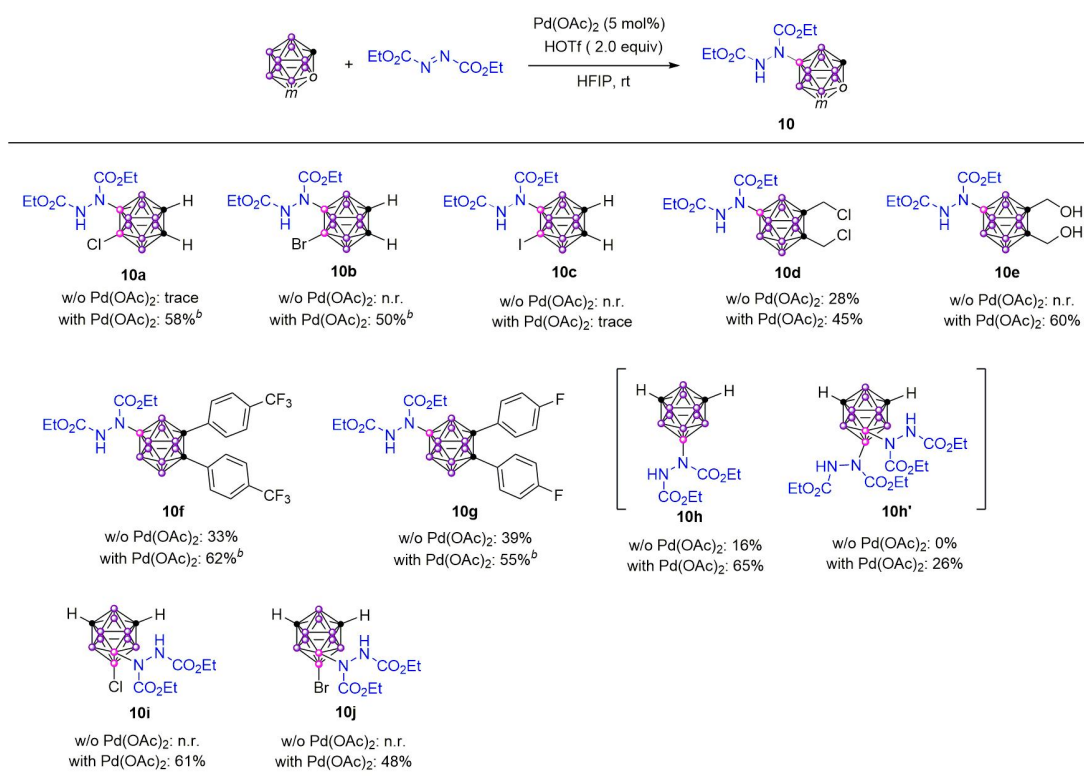

[a] Reaction conditions: carboranes (0.2 mmol, 1.0 equiv), DEAD (0.22 mmol, 1.1 equiv), Pd(OAc)<sub>2</sub> (5 mol%) and HOTf (0.2 mmol, 1.0 equiv) in HFIP (2 mL) at room temperature under an air atmosphere. [b] At 60 °C for 12 hours.

**(g) Proposed mechanism for Pd(II)-catalyzed B(9)-amination of *o*-carborane**

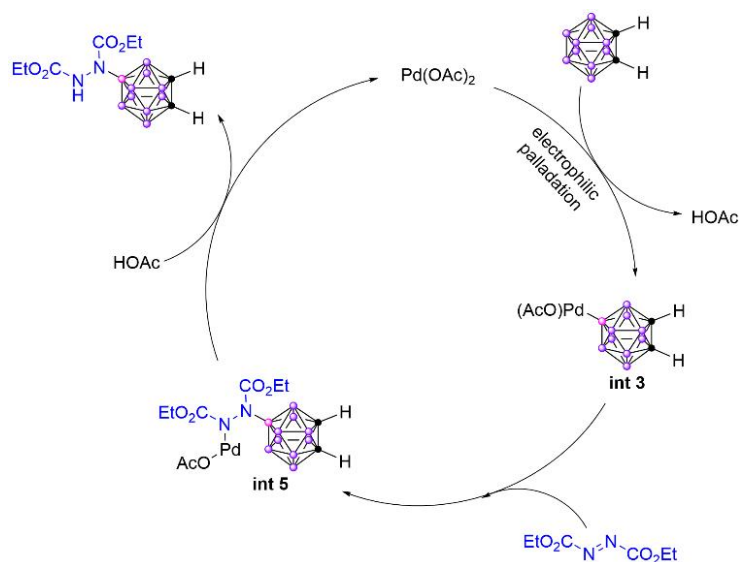

**Scheme S2.** The plausible mechanism of Pd(II)-catalyzed B(9)-amination of *o*-carborane

Based on the experiment results and our previous mechanism studies, a plausible mechanism of Pd(II)-catalyzed B(9)-amination of *o*-carborane is proposed, as shown in **Scheme S2**. We consider that the first step in the catalytic cycle is the formation of B–Pd intermediate **int 3** through electrophilic palladation process. Then the aminating reagent (DEAD) electrophilic addition occurs to form the B–N intermediate **int 5**, following protonation to form the target product and

the catalyst palladium enters the catalytic cycle.

### (h) Comparison of Pd(II)-catalyzed B-H/C-H amination of *o*-carborane and benzene

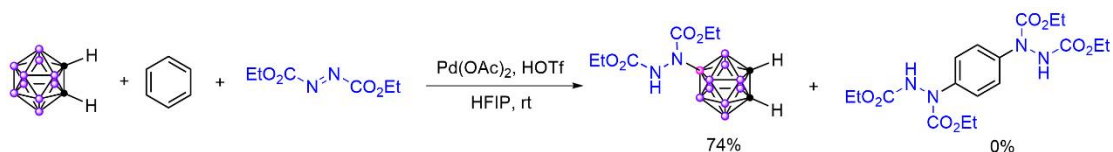

**General procedure:** *o*-Carborane (2.0 equiv, 0.40 mmol), DEAD (1.0 equiv, 0.20 mmol) and Pd(OAc)<sub>2</sub> (10 mol%) were mixed in HFIP (4.0 mL). Then to this solution was added benzene (2.0 equiv, 0.40 mmol), HOTf (50 mol%) and the resulting mixture was stirred in a closed flask at ambient temperature for 12 h under air atmosphere. Then, the reaction solution was monitored by <sup>11</sup>B NMR and <sup>1</sup>H NMR spectroscopy to gain the product yield. Then, the reaction solution was monitored by <sup>11</sup>B NMR and <sup>1</sup>H NMR spectroscopy to gain the product yield.

### 3. Characterization data

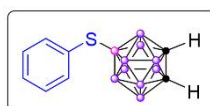

**1a:** Yield 35%; White solid; **Eluent:** PE/EA = 50:1 (*R<sub>f</sub>* = 0.28), Mp:124-126 °C.

**<sup>1</sup>H NMR (600 MHz, CDCl<sub>3</sub>)** δ: 7.43 (d, *J* = 5.2 Hz, 2H), 7.24 (s, 1H), 7.23 (d, *J* = 1.4 Hz, 2H), 3.50 (s, 1H), 3.41 (s, 1H). **<sup>13</sup>C{<sup>1</sup>H} NMR (151 MHz, CDCl<sub>3</sub>)** δ: 135.4, 134.9, 128.5, 126.9, 52.7, 47.5. **<sup>11</sup>B{<sup>1</sup>H} NMR (193 MHz, CDCl<sub>3</sub>)** δ: 7.5 (1B), -2.3 (1B), -8.6 (2B), -13.9 (2B), -14.6 (2B), -15.5 (2B). **IR:** 621, 718, 1069, 2603, 3258 cm<sup>-1</sup>.

**HRMS (ESI-TOF):** *m/z* calcd for C<sub>8</sub>B<sub>10</sub>H<sub>17</sub>S [M+H]<sup>+</sup>: 253.2053. Found: 253.2051.

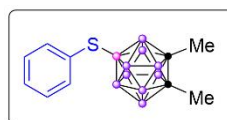

**1b:** Yield 72%; White solid; **Eluent:** PE/EA = 25:1 (*R<sub>f</sub>* = 0.32).

**<sup>1</sup>H NMR (600 MHz, CDCl<sub>3</sub>)** δ: 7.45 (d, *J* = 5.5 Hz, 2H), 7.25 (s, 1H), 7.23 (d, *J* = 0.8 Hz, 2H), 1.99 (s, 3H), 1.98 (s, 3H). **<sup>13</sup>C{<sup>1</sup>H} NMR (151 MHz, CDCl<sub>3</sub>)** δ: 135.8, 134.8, 128.4, 126.7, 71.9, 66.5, 23.2, 21.9. **<sup>11</sup>B{<sup>1</sup>H} NMR (193 MHz, CDCl<sub>3</sub>)** δ: 5.3 (1B), -4.8 (1B), -8.9 (2B), -9.8 (4B), -10.3 (2B).

**HRMS (ESI-TOF):** *m/z* calcd for C<sub>10</sub>B<sub>10</sub>H<sub>21</sub>S [M+H]<sup>+</sup>: 281.2367. Found: 281.2366.

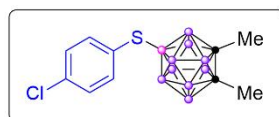

**1c:** Yield 61%; White solid; **Eluent:** PE/EA = 25:1 (*R<sub>f</sub>* = 0.28).

**<sup>1</sup>H NMR (600 MHz, CDCl<sub>3</sub>)** δ: 7.35 (d, *J* = 8.3 Hz, 2H), 7.19 (d, *J* = 8.5 Hz, 2H), 1.99 (s, 3H), 1.98 (s, 3H). **<sup>13</sup>C{<sup>1</sup>H} NMR (151 MHz, CDCl<sub>3</sub>)** δ: 136.1, 134.4, 132.9, 128.6, 71.9, 66.7, 23.2, 22.0. **<sup>11</sup>B{<sup>1</sup>H} NMR (193 MHz, CDCl<sub>3</sub>)** δ: 5.1 (1B), -4.8 (1B), -8.9 (2B), -9.8 (4B), -10.3 (2B).

**HRMS (ESI-TOF):** *m/z* calcd for C<sub>10</sub>B<sub>10</sub>H<sub>20</sub>SCl [M+H]<sup>+</sup>: 316.1951. Found: 316.1953.

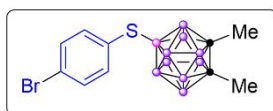

**1d:** Yield 63%; White solid; **Eluent:** PE/EA = 100:1 ( $R_f$  = 0.28).

**$^1\text{H}$  NMR (600 MHz,  $\text{CDCl}_3$ )**  $\delta$ : 7.34 (d,  $J$  = 8.5 Hz, 2H), 7.28 (d,  $J$  = 8.3 Hz, 2H), 1.99 (s, 3H), 1.98 (s, 3H).  **$^{13}\text{C}\{^1\text{H}\}$  NMR (151 MHz,  $\text{CDCl}_3$ )**  $\delta$ : 136.5, 135.0, 131.5, 121.1, 71.9, 66.7, 23.3, 22.0.  **$^{11}\text{B}\{^1\text{H}\}$  NMR (193 MHz,  $\text{CDCl}_3$ )**  $\delta$ : 5.0 (1B), -4.8 (1B), -8.9 (2B), -9.8 (4B), -10.2 (2B).

**HRMS (ESI-TOF):**  $m/z$  calcd for  $\text{C}_{10}\text{B}_{10}\text{H}_{20}\text{SBr}$   $[\text{M}+\text{H}]^+$ : 360.1458. Found: 360.1456.

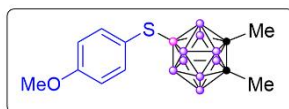

**1e:** Yield 37%; White solid; **Eluent:** PE/EA = 25:1 ( $R_f$  = 0.26).

**$^1\text{H}$  NMR (600 MHz,  $\text{CDCl}_3$ )**  $\delta$ : 7.33 (d,  $J$  = 8.4 Hz, 2H), 6.77 (d,  $J$  = 8.6 Hz, 2H), 3.78 (s, 3H), 1.98 (s, 3H), 1.98 (s, 3H).  **$^{13}\text{C}\{^1\text{H}\}$  NMR (151 MHz,  $\text{CDCl}_3$ )**  $\delta$ : 158.8, 136.2, 126.7, 114.0, 71.8, 66.2, 55.2, 23.3, 22.0.  **$^{11}\text{B}\{^1\text{H}\}$  NMR (193 MHz,  $\text{CDCl}_3$ )**  $\delta$ : 5.7 (1B), -4.7 (1B), -8.9 (2B), -9.8 (4B), -10.3 (2B).

**HRMS (ESI-TOF):**  $m/z$  calcd for  $\text{C}_{11}\text{B}_{10}\text{H}_{23}\text{SO}$   $[\text{M}+\text{H}]^+$ : 311.2473. Found: 311.2468.

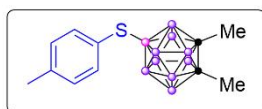

**1f:** Yield 38%; White solid; **Eluent:** PE ( $R_f$  = 0.26).

**$^1\text{H}$  NMR (600 MHz,  $\text{CDCl}_3$ )**  $\delta$ : 7.31 (d,  $J$  = 7.9 Hz, 2H), 7.04 (d,  $J$  = 7.9 Hz, 2H), 2.31 (s, 3H), 1.98 (s, 3H), 1.98 (s, 3H).  **$^{13}\text{C}\{^1\text{H}\}$  NMR (151 MHz,  $\text{CDCl}_3$ )**  $\delta$ : 136.5, 134.8, 132.2, 129.2, 71.8, 66.3, 23.2, 22.0, 21.1.  **$^{11}\text{B}\{^1\text{H}\}$  NMR (193 MHz,  $\text{CDCl}_3$ )**  $\delta$ : 5.5 (1B), -4.7 (1B), -8.9 (2B), -9.7 (4B), -10.3 (2B).

**HRMS (ESI-TOF):**  $m/z$  calcd for  $\text{C}_{11}\text{B}_{10}\text{H}_{22}\text{SNH}_4$   $[\text{M}+\text{NH}_4]^+$ : 312.2790. Found: 312.2785.

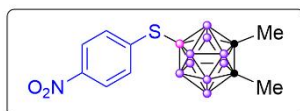

**1g:** Yield 62%; White solid; **Eluent:** PE/EA = 25:1 ( $R_f$  = 0.32).

**$^1\text{H}$  NMR (600 MHz,  $\text{CDCl}_3$ )**  $\delta$ : 8.06 (d,  $J$  = 8.8 Hz, 2H), 7.56 (d,  $J$  = 8.6 Hz, 2H), 2.02 (s, 3H), 2.01 (s, 3H).  **$^{13}\text{C}\{^1\text{H}\}$  NMR (151 MHz,  $\text{CDCl}_3$ )**  $\delta$ : 146.4, 145.8, 134.3, 123.3, 72.2, 67.7, 23.3, 22.0.  **$^{11}\text{B}\{^1\text{H}\}$  NMR (193 MHz,  $\text{CDCl}_3$ )**  $\delta$ : 4.2 (1B), -4.8 (1B), -8.8 (2B), -9.8 (6B).

**HRMS (ESI-TOF):**  $m/z$  calcd for  $\text{C}_{10}\text{B}_{10}\text{H}_{20}\text{SNO}_2$   $[\text{M}+\text{H}]^+$ : 326.2218. Found: 326.2216.

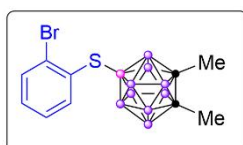

**1h:** Yield 55%; White solid; **Eluent:** PE/EA = 25:1 ( $R_f$  = 0.26).

**$^1\text{H}$  NMR (600 MHz,  $\text{CDCl}_3$ )**  $\delta$ : 7.57 (d,  $J$  = 8.0 Hz, 2H), 7.18 (t,  $J$  = 7.5 Hz, 1H), 7.06 (t,  $J$  = 7.6 Hz, 1H), 1.99 (s, 3H), 1.98 (s, 3H).  **$^{13}\text{C}\{^1\text{H}\}$  NMR (151 MHz,  $\text{CDCl}_3$ )**  $\delta$ : 137.6, 137.2, 132.9, 130.3, 128.4, 127.2, 71.9, 66.9, 23.3, 22.0.  **$^{11}\text{B}\{^1\text{H}\}$  NMR (193 MHz,  $\text{CDCl}_3$ )**  $\delta$ : 4.9 (1B), -4.7

(1B), -9.0 (2B), -9.8 (4B), -10.3 (2B).

**HRMS (ESI-TOF):**  $m/z$  calcd for  $C_{10}B_{10}H_{20}SBr$   $[M+H]^+$ : 360.1458. Found: 360.1457.

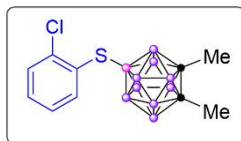

**1i:** Yield 73%; White solid; **Eluent:** PE/EA = 25:1 ( $R_f$  = 0.28).

**$^1H$  NMR (600 MHz,  $CDCl_3$ )**  $\delta$ : 7.55 (d,  $J$  = 7.4 Hz, 1H), 7.38 (d,  $J$  = 7.8 Hz, 1H), 7.18 – 7.11 (m, 2H), 1.99 (s, 3H), 1.98 (s, 3H).  **$^{13}C\{^1H\}$  NMR (151 MHz,  $CDCl_3$ )**  $\delta$ : 139.0, 137.8, 135.0, 129.5, 128.4, 126.6, 71.9, 66.8, 23.3, 22.0.  **$^{11}B\{^1H\}$  NMR (193 MHz,  $CDCl_3$ )**  $\delta$ : 4.8 (1B), -4.8 (1B), -9.0 (2B), -9.8 (4B), -10.3 (2B).

**HRMS (ESI-TOF):**  $m/z$  calcd for  $C_{10}B_{10}H_{20}SCl$   $[M+H]^+$ : 316.1951. Found: 316.1950.

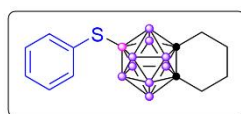

**1j:** Yield 64%; White solid; **Eluent:** PE/EA = 50:1 ( $R_f$  = 0.32).

**$^1H$  NMR (600 MHz,  $CDCl_3$ )**  $\delta$ : 7.44 (d,  $J$  = 6.4 Hz, 2H), 7.23 (s, 1H), 7.22 (s, 2H), 2.39 (s, 4H), 1.56 – 1.51 (m, 4H).  **$^{13}C\{^1H\}$  NMR (151 MHz,  $CDCl_3$ )**  $\delta$ : 135.9, 134.9, 128.4, 126.7, 71.6, 66.2, 32.7, 31.6, 19.7, 19.4.  **$^{11}B\{^1H\}$  NMR (193 MHz,  $CDCl_3$ )**  $\delta$ : 4.7 (1B), -5.2 (1B), -8.7 (2B), -9.8 (2B), -10.4 (2B), -12.3 (2B).

**HRMS (ESI-TOF):**  $m/z$  calcd for  $C_{12}B_{10}H_{23}S$   $[M+H]^+$ : 307.2525. Found: 307.2524.

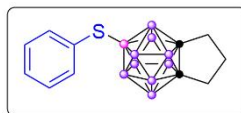

**1k:** Yield 70%; White solid; **Eluent:** PE/EA = 50:1 ( $R_f$  = 0.32).

**$^1H$  NMR (600 MHz,  $CD_2Cl_2$ )**  $\delta$ : 7.44 (d,  $J$  = 6.2 Hz, 2H), 7.23 (s, 1H), 7.22 (s, 2H), 2.48 – 2.38 (m, 6H).  **$^{13}C\{^1H\}$  NMR (151 MHz,  $CDCl_3$ )**  $\delta$ : 135.9, 134.9, 128.4, 126.7, 82.9, 77.8, 34.4, 33.3, 32.3.  **$^{11}B\{^1H\}$  NMR (193 MHz,  $CDCl_3$ )**  $\delta$ : 4.2 (1B), -6.0 (1B), -7.5 (2B), -9.7 (2B), -11.8 (2B), -12.5 (2B).

**HRMS (ESI-TOF)**  $m/z$  calcd for  $C_{11}B_{10}H_{21}S$   $[M+H]^+$ : 293.2368. Found: 293.2369.

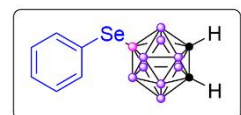

**2a:** White solid; **Eluent:** PE/EA = 50:1 ( $R_f$  = 0.28), Mp: 94-97 °C.

**$^1H$  NMR (400 MHz,  $CDCl_3$ )**  $\delta$ : 7.58 (d,  $J$  = 7.2 Hz, 2H), 7.28 (d,  $J$  = 3.2 Hz, 1H), 7.26 – 7.20 (m, 2H), 3.55 (s, 2H).  **$^{13}C\{^1H\}$  NMR (101 MHz,  $CDCl_3$ )**  $\delta$ : 136.2, 129.1, 128.6, 127.0, 53.7, 49.4.  **$^{11}B\{^1H\}$  NMR (128 MHz,  $CDCl_3$ )**  $\delta$ : 3.0 (1B), -2.0 (1B), -8.4 (2B), -14.0 (4B), -15.1 (2B). **IR:** 720, 846, 1023, 1134, 2556, 3052  $cm^{-1}$ .

**HRMS (ESI-TOF):**  $m/z$  calcd for  $C_8B_{10}H_{16}SeK$   $[M+K]^+$ : 339.1047. Found: 339.1070. <sup>[1]</sup>

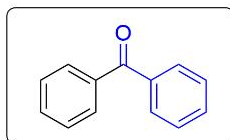

**3a:** Yield 72%; White solid; **Eluent:** PE/EA = 50:1 ( $R_f$  = 0.32), Mp: 47-49 °C.

**$^1\text{H}$  NMR (400 MHz,  $\text{CD}_3\text{CN}$ )**  $\delta$ : 7.76 (d,  $J$  = 7.2 Hz, 4H), 7.64 (t,  $J$  = 7.4 Hz, 2H), 7.52 (t,  $J$  = 7.6 Hz, 4H).  **$^{13}\text{C}\{^1\text{H}\}$  NMR (101 MHz,  $\text{CD}_3\text{CN}$ )**  $\delta$ : 197.2, 138.5, 133.4, 130.7, 129.3. **IR:** 634, 688, 943, 1269, 1448, 1646  $\text{cm}^{-1}$ .

**HRMS (ESI-TOF):**  $m/z$  calcd for  $\text{C}_{13}\text{H}_{10}\text{ONH}_4$   $[\text{M}+\text{NH}_4]^+$ : 200.1070. Found: 200.1076. <sup>[2]</sup>

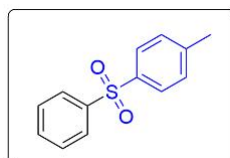

**4a:** Yield 97%; White solid; **Eluent:** DCM/EA = 20:1 ( $R_f$  = 0.28), Mp: 127-129 °C.

**$^1\text{H}$  NMR (400 MHz,  $\text{CD}_3\text{CN}$ )**  $\delta$ : 8.59 (d,  $J$  = 7.2 Hz, 2H), 8.49 (d,  $J$  = 8.1 Hz, 2H), 8.29 (t,  $J$  = 7.3 Hz, 1H), 8.23 (t,  $J$  = 7.4 Hz, 2H), 8.04 (d,  $J$  = 8.0 Hz, 2H), 3.05 (s, 3H).  **$^{13}\text{C}\{^1\text{H}\}$  NMR (101 MHz,  $\text{CD}_3\text{CN}$ )**  $\delta$ : 145.8, 142.9, 139.6, 134.3, 131.1, 130.5, 128.4, 128.2, 21.5. **IR:** 548, 651, 688, 723, 813, 1101, 1155, 1293, 1448  $\text{cm}^{-1}$ .

**HRMS (ESI-TOF):**  $m/z$  calcd for  $\text{C}_{13}\text{H}_{12}\text{O}_2\text{SNa}$   $[\text{M}+\text{Na}]^+$ : 225.0450. Found: 255.0456. <sup>[3]</sup>

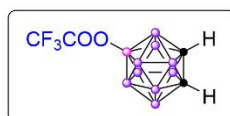

**5a:** White solid; **Eluent:** PE/DCM = 3:1 ( $R_f$  = 0.28), Mp: 100-102 °C.

**$^1\text{H}$  NMR (400 MHz,  $\text{CDCl}_3$ )**  $\delta$ : 3.54 (s, 2H).  **$^{13}\text{C}\{^1\text{H}\}$  NMR (101 MHz,  $\text{CDCl}_3$ )**  $\delta$ : 155.8 (q,  $J$  = 41.41), 114.5 (q,  $J$  = 286.84), 50.5, 44.3.  **$^{11}\text{B}\{^1\text{H}\}$  NMR (128 MHz,  $\text{CDCl}_3$ )**  $\delta$ : 10.0 (1B), -3.5 (1B), -10.4 (2B), -115.0 (2B), -16.1 (2B), -17.2 (2B).  **$^{19}\text{F}$  NMR (377 MHz,  $\text{CDCl}_3$ )**  $\delta$ : -75.88. **IR:** 506, 725, 873, 1028, 1162, 1388, 1771, 2613, 3091  $\text{cm}^{-1}$ .

**HRMS (ESI-TOF):**  $m/z$  calcd for  $\text{C}_4\text{B}_{10}\text{H}_{11}\text{O}_2\text{F}_3$   $[\text{M}+\text{H}]^+$ : 257.1789. Found: 257.1791. <sup>[4]</sup>

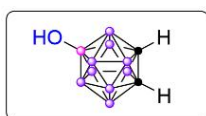

**5b:** White solid; **Eluent:** PE/DCM = 1:1 ( $R_f$  = 0.28), Mp: 312-314 °C.

**$^1\text{H}$  NMR (400 MHz,  $\text{CDCl}_3$ )**  $\delta$ : 3.38 (s, 1H), 3.26 (s, 1H), 1.84 (s, 1H).  **$^{13}\text{C}\{^1\text{H}\}$  NMR (101 MHz,  $\text{CDCl}_3$ )**  $\delta$ : 49.1, 37.1.  **$^{11}\text{B}\{^1\text{H}\}$  NMR (128 MHz,  $\text{CDCl}_3$ )**  $\delta$ : 14.7 (1B), -3.8 (1B), -10.2 (2B), -15.2 (2B), -16.8 (2B), -17.7 (2B). **IR:** 465, 721, 1028, 1122, 2548, 3070, 3272  $\text{cm}^{-1}$ .

**HRMS (ESI-TOF):**  $m/z$  calcd for  $\text{C}_2\text{B}_{10}\text{H}_{12}\text{O}_1$   $[\text{M}+\text{H}]^+$ : 161.1965. Found: 161.1961. <sup>[4]</sup>

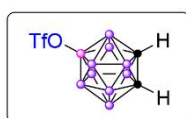

**5c:** Colorless oil; **Eluent:** PE/DCM = 4:1 ( $R_f$  = 0.26).

**$^1\text{H}$  NMR (400 MHz,  $\text{CDCl}_3$ )**  $\delta$ : 3.55 (s, 2H).  **$^{13}\text{C}\{^1\text{H}\}$  NMR (101 MHz,  $\text{CDCl}_3$ )**  $\delta$ : 118.3 (q,  $J$  = 319.16 Hz), 50.6, 44.1.  **$^{11}\text{B}\{^1\text{H}\}$  NMR (128 MHz,  $\text{CDCl}_3$ )**  $\delta$ : 9.8 (1B), -3.6 (1B), -10.4 (2B), -15.2

(2B), -16.0 (2B), -17.1 (2B).  $^{19}\text{F}$  NMR (377 MHz,  $\text{CDCl}_3$ )  $\delta$ : -75.91. IR: 509, 612, 886, 968, 1028, 1096, 1209, 1388, 2601, 3076  $\text{cm}^{-1}$ .

HRMS (ESI-TOF):  $m/z$  calcd for  $\text{C}_3\text{B}_{10}\text{H}_{11}\text{SF}_3\text{O}_3$   $[\text{M}+\text{H}]^+$ : 293.1459. Found: 293.1463. [4]

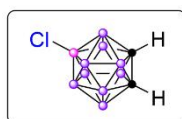

**6a:** White solid; Eluent: DCM/EA = 50:1 ( $R_f$  = 0.32), Mp: 221-223  $^{\circ}\text{C}$ .

$^1\text{H}$  NMR (400 MHz,  $\text{CDCl}_3$ )  $\delta$ : 3.57 (s, 1H), 3.45 (s, 1H).  $^{13}\text{C}\{^1\text{H}\}$  NMR (101 MHz,  $\text{CDCl}_3$ )  $\delta$ : 52.1, 44.4.  $^{11}\text{B}\{^1\text{H}\}$  NMR (128 MHz,  $\text{CDCl}_3$ )  $\delta$ : 7.4 (1B), -2.1 (1B), -8.8 (2B), -13.8 (2B), -15.1 (2B), -16.3 (2B). IR: 531, 723, 873, 972, 1007, 1140, 1713, 2570, 3063  $\text{cm}^{-1}$ .

HRMS (ESI-TOF):  $m/z$  calcd for  $\text{C}_2\text{B}_{10}\text{H}_{12}\text{Cl}$   $[\text{M}+\text{H}]^+$ : 180.1599. Found: 180.1598. [5]

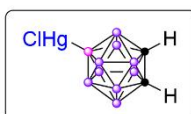

**7a:** White solid; Eluent: PE/EA = 3:1 ( $R_f$  = 0.26), Mp: 266-268  $^{\circ}\text{C}$ .

$^1\text{H}$  NMR (400 MHz,  $\text{CDCl}_3$ )  $\delta$ : 3.74 (s, 1H), 3.54 (s, 1H).  $^{13}\text{C}\{^1\text{H}\}$  NMR (101 MHz,  $\text{CDCl}_3$ )  $\delta$ : 58.9, 57.0.  $^{11}\text{B}\{^1\text{H}\}$  NMR (128 MHz,  $\text{CDCl}_3$ )  $\delta$ : 3.5 (1B), -1.0 (1B), -8.1 (2B), -12.5 (4B), -13.7 (2B). IR: 716, 852, 966, 1141, 1211, 2564, 3031  $\text{cm}^{-1}$ .

HRMS (ESI-TOF):  $m/z$  calcd for  $\text{C}_2\text{B}_{10}\text{H}_{11}\text{HgClNH}_4$   $[\text{M}+\text{NH}_4]^+$ : 397.1574. Found: 397.1581.

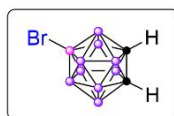

**8a:** White solid; Eluent: DCM/EA = 50:1 ( $R_f$  = 0.32), Mp: 182-184  $^{\circ}\text{C}$ .

$^1\text{H}$  NMR (400 MHz,  $\text{CDCl}_3$ )  $\delta$ : 3.62 (s, 2H).  $^{13}\text{C}\{^1\text{H}\}$  NMR (101 MHz,  $\text{CDCl}_3$ )  $\delta$ : 53.2, 46.7.  $^{11}\text{B}\{^1\text{H}\}$  NMR (128 MHz,  $\text{CDCl}_3$ )  $\delta$ : 0.1 (1B), -1.6 (1B), -8.3 (2B), -13.5 (2B), -14.5 (2B), -15.7 (2B). IR: 725, 846, 966, 1137, 1207, 2595, 3058  $\text{cm}^{-1}$ .

HRMS (ESI-TOF):  $m/z$  calcd for  $\text{C}_2\text{B}_{10}\text{H}_{11}\text{BrNH}_4$   $[\text{M}+\text{NH}_4]^+$ : 241.1372. Found: 241.1390. [5]

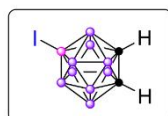

**9a:** White solid; Eluent: DCM/EA = 50:1 ( $R_f$  = 0.32), Mp: 119-120  $^{\circ}\text{C}$ .

$^1\text{H}$  NMR (600 MHz,  $\text{CDCl}_3$ )  $\delta$ : 3.87 (s, 1H), 3.66 (s, 1H).  $^{13}\text{C}\{^1\text{H}\}$  NMR (151 MHz,  $\text{CDCl}_3$ )  $\delta$ : 54.8, 50.7.  $^{11}\text{B}\{^1\text{H}\}$  NMR (193 MHz,  $\text{CDCl}_3$ )  $\delta$ : -0.9 (1B), -7.5 (2B), -12.8 (2B), -13.4 (2B), -14.8 (2B), -16.6 (1B). IR: 725, 832, 966, 1137, 1204, 2579, 3048  $\text{cm}^{-1}$ .

HRMS (ESI-TOF):  $m/z$  calcd for  $\text{C}_2\text{B}_{10}\text{H}_{11}\text{IK}$   $[\text{M}+\text{K}]^+$ : 309.0542. Found: 309.0525. [5]

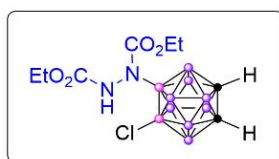

**10a:** Yield 58%; White solid; Eluent: PE/EA = 2:1 ( $R_f$  = 0.26).

$^1\text{H}$  NMR (600 MHz,  $\text{CDCl}_3$ )  $\delta$ : 6.70 – 6.30 (m, 1H), 4.13 (s, 4H), 3.66 (s, 1H), 3.56 (s, 1H), 1.24 (t,  $J$  = 7.1 Hz, 6H).  $^{13}\text{C}\{^1\text{H}\}$  NMR (151 MHz,  $\text{CDCl}_3$ )  $\delta$ : 157.7, 156.3, 62.5, 61.6, 44.4, 43.1, 14.4,



14.2.  $^{11}\text{B}\{^1\text{H}\}$  NMR (193 MHz,  $\text{CDCl}_3$ )  $\delta$ : 7.3 (1B), 6.4 (1B), -9.7 (1B), -10.8 (1B), -16.2 (4B), -18.8 (2B).

HRMS (ESI-TOF):  $m/z$  calcd for  $\text{C}_8\text{B}_{10}\text{H}_{22}\text{N}_2\text{O}_4\text{Cl}$   $[\text{M}+\text{H}]^+$ : 354.2243. Found: 354.2245.

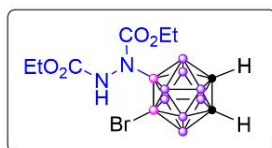

**10b**: Yield 50%; White solid; **Eluent**: PE/EA = 2:1 ( $R_f$  = 0.32).

$^1\text{H}$  NMR (600 MHz,  $\text{CDCl}_3$ )  $\delta$ : 6.75 – 6.35 (m, 1H), 4.22 – 4.08 (m, 4H), 3.59 (s, 2H), 1.27 (t,  $J$  = 7.1 Hz, 6H).  $^{13}\text{C}\{^1\text{H}\}$  NMR (151 MHz,  $\text{CDCl}_3$ )  $\delta$ : 157.6, 156.3, 62.6, 61.6, 45.3, 45.2, 14.5, 14.2.  $^{11}\text{B}\{^1\text{H}\}$  NMR (193 MHz,  $\text{CDCl}_3$ )  $\delta$ : 7.6 (1B), -0.4 (1B), -9.1 (1B), -10.4 (1B), -16.0 (4B), -18.3 (2B).

HRMS (ESI-TOF):  $m/z$  calcd for  $\text{C}_8\text{B}_{10}\text{H}_{22}\text{N}_2\text{O}_4\text{Br}$   $[\text{M}+\text{H}]^+$ : 398.1750. Found: 398.1749.

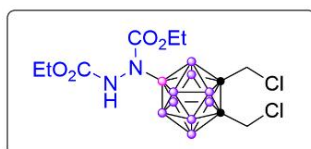

**10d**: Yield 45%; White solid; **Eluent**: PE/EA = 2:1 ( $R_f$  = 0.26).

$^1\text{H}$  NMR (400 MHz,  $\text{CDCl}_3$ )  $\delta$ : 6.52 – 6.05 (m, 1H), 4.20 (s, 2H), 4.15 (s, 4H), 1.25 (t,  $J$  = 7.1 Hz, 6H).  $^{13}\text{C}\{^1\text{H}\}$  NMR (101 MHz,  $\text{CDCl}_3$ )  $\delta$ : 157.9, 156.4, 62.4, 61.7, 43.9, 42.9, 14.4, 14.3.  $^{11}\text{B}\{^1\text{H}\}$  NMR (128 MHz,  $\text{CDCl}_3$ ) 8.5 (1B), -4.3 (1B), -10.9 (4B), -12.5 (4B).

HRMS (ESI-TOF):  $m/z$  calcd for  $\text{C}_{10}\text{B}_{10}\text{H}_{25}\text{N}_2\text{O}_4\text{Cl}_2$   $[\text{M}+\text{H}]^+$ : 416.2173. Found: 416.2174. <sup>[6]</sup>

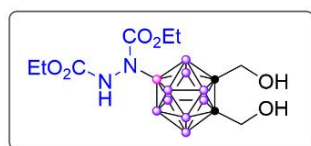

**10e**: Yield 60%; White solid; **Eluent**: PE/EA = 4:1 ( $R_f$  = 0.32)

$^1\text{H}$  NMR (400 MHz,  $\text{CDCl}_3$ )  $\delta$ : 6.50 – 6.10 (m, 1H), 4.17 – 4.01 (m, 4H), 2.01 (s, 3H), 2.00 (s, 3H), 1.21 (t,  $J$  = 7.1 Hz, 6H).  $^{13}\text{C}\{^1\text{H}\}$  NMR (101 MHz,  $\text{CDCl}_3$ )  $\delta$ : 158.0, 156.3, 69.5, 64.4, 62.0, 61.3, 23.5, 21.4, 14.3, 14.2.  $^{11}\text{B}\{^1\text{H}\}$  NMR (128 MHz,  $\text{CDCl}_3$ ) 8.7 (1B), -6.2 (1B), -10.9 (8B).

HRMS (ESI-TOF):  $m/z$  calcd for  $\text{C}_{10}\text{B}_{10}\text{H}_{26}\text{N}_2\text{O}_4\text{Na}$   $[\text{M}+\text{Na}]^+$ : 369.2793. Found: 369.2798.

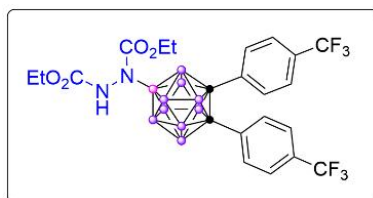

**10f**: Yield 62%; White solid; **Eluent**: PE/EA = 4:1 ( $R_f$  = 0.28).

$^1\text{H}$  NMR (400 MHz,  $\text{CDCl}_3$ )  $\delta$ : 7.56 (t,  $J$  = 8.0 Hz, 4H), 7.44 (d,  $J$  = 8.2 Hz, 4H), 6.55 – 6.13 (m, 1H), 4.26 – 4.05 (m, 4H), 1.29 – 1.21 (m, 6H).  $^{13}\text{C}\{^1\text{H}\}$  NMR (101 MHz,  $\text{CDCl}_3$ )  $\delta$ : 157.9, 156.6, 132.7 (dd,  $J_1$  = 71.71 Hz,  $J_2$  = 31.31 Hz), 131.2, 131.0, 125.6 (q,  $J$  = 3.03 Hz), 123.1 (q,  $J$  = 273.71 Hz), 79.4, 74.4, 62.4, 61.7, 14.5, 14.3.  $^{11}\text{B}\{^1\text{H}\}$  NMR (128 MHz,  $\text{CDCl}_3$ )  $\delta$ : 9.8 (1B), -3.0 (1B), -10.7 (8B).  $^{19}\text{F}$  NMR (377 MHz,  $\text{CDCl}_3$ )  $\delta$ : -63.23 (d,  $J$  = 2.6 Hz).

**HRMS (ESI-TOF):**  $m/z$  calcd for  $C_{22}B_{10}H_{29}N_2O_4F_6$   $[M+H]^+$ : 607.3040. Found: 607.3041. <sup>[6]</sup>

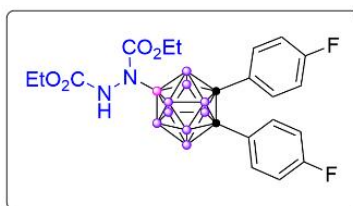

**10g:** Yield 55%; White solid; **Eluent:** PE/EA = 4:1 ( $R_f$  = 0.28).

**<sup>1</sup>H NMR (400 MHz, CDCl<sub>3</sub>)**  $\delta$ : 7.49 – 7.36 (m, 4H), 6.84 (t,  $J$  = 8.4 Hz, 4H), 6.54 – 6.15 (m, 1H), 4.27 – 4.06 (m, 4H), 1.32 – 1.20 (m, 6H). **<sup>13</sup>C{<sup>1</sup>H} NMR (101 MHz, CDCl<sub>3</sub>)**  $\delta$ : 163.7 (d,  $J$  = 253.51 Hz), 158.0, 156.6, 132.9 (d,  $J$  = 9.09 Hz), 126.3, 125.3, 115.6 (d,  $J$  = 22.22 Hz), 80.6, 75.2, 62.3, 61.6, 14.4, 14.3. **<sup>11</sup>B{<sup>1</sup>H} NMR (128 MHz, CDCl<sub>3</sub>)**  $\delta$ : 9.5 (1B), -3.0 (1B), -10.7 (8B). **<sup>19</sup>F NMR (377 MHz, CDCl<sub>3</sub>)**  $\delta$ : -109.24.

**HRMS (ESI-TOF):**  $m/z$  calcd for  $C_{20}B_{10}H_{29}N_2O_4F_2$   $[M+H]^+$ : 507.3103. Found: 507.3101. <sup>[6]</sup>

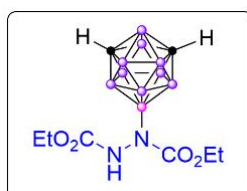

**10h:** Yield 65%; White solid; **Eluent:** PE/EA = 4:1 ( $R_f$  = 0.26), Mp:115-117 °C.

**<sup>1</sup>H NMR (400 MHz, CDCl<sub>3</sub>)**  $\delta$ : 6.61 – 6.26 (m, 1H), 4.27 – 4.05 (m, 4H), 2.84 (s, 2H), 1.25 (t,  $J$  = 7.1 Hz, 6H). **<sup>13</sup>C{<sup>1</sup>H} NMR (101 MHz, CDCl<sub>3</sub>)**  $\delta$ : 158.1, 156.5, 62.4, 61.7, 51.4, 14.4, 14.3. **<sup>11</sup>B{<sup>1</sup>H} NMR (128 MHz, CDCl<sub>3</sub>)**  $\delta$ : 2.2 (1B), -7.4 (2B), -11.0 (1B), -14.0 (2B), -15.5 (2B), -19.0 (1B), -22.0 (1B). **IR:** 743, 1065, 1225, 1277, 1674, 2613, 3056, 3262  $cm^{-1}$ .

**HRMS (ESI-TOF):**  $m/z$  calcd for  $C_8B_{10}H_{23}N_2O_4$   $[M+H]^+$ : 319.2660. Found: 319.2661. <sup>[6]</sup>

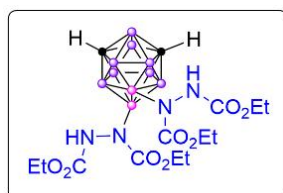

**10h':** Yield 26%; White solid; **Eluent:** PE/EA = 2:1 ( $R_f$  = 0.28).

**<sup>1</sup>H NMR (400 MHz, CDCl<sub>3</sub>)**  $\delta$ : 7.65 – 6.69 (m, 2H), 4.17 (s, 8H), 2.73 (s, 2H), 1.31 – 1.17 (m, 12H). **<sup>13</sup>C{<sup>1</sup>H} NMR (101 MHz, CDCl<sub>3</sub>)**  $\delta$ : 157.6, 156.4, 62.2, 61.6, 46.0, 14.5, 14.3. **<sup>11</sup>B{<sup>1</sup>H} NMR (128 MHz, CDCl<sub>3</sub>)**  $\delta$ : 0.8 (1B), 0.5 (1B), -9.5 (2B), -16.0 (4B), -24.0 (2B).

**HRMS (ESI-TOF):**  $m/z$  calcd for  $C_{14}B_{10}H_{32}N_4O_8K$   $[M+K]^+$ : 503.2801. Found: 503.2839.

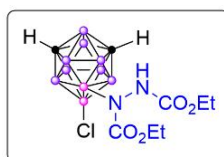

**10i:** Yield 61%; White solid; **Eluent:** PE/EA = 4:1 ( $R_f$  = 0.32).

**<sup>1</sup>H NMR (600 MHz, CDCl<sub>3</sub>)**  $\delta$ : 6.75 – 6.30 (m, 1H), 4.21 (d,  $J$  = 7.0 Hz, 4H), 2.83 (s, 1H), 2.79 (s, 1H), 1.28 – 1.24 (m, 6H). **<sup>13</sup>C{<sup>1</sup>H} NMR (151 MHz, CDCl<sub>3</sub>)**  $\delta$ : 156.5, 62.7, 61.8, 47.6, 14.5,

14.3.  $^{11}\text{B}\{^1\text{H}\}$  NMR (193 MHz,  $\text{CDCl}_3$ )  $\delta$ : 1.3 (1B), -0.3 (1B), -7.5 (1B), -8.4 (1B), -15.3 (4B), -23.9 (2B).

HRMS (ESI-TOF):  $m/z$  calcd for  $\text{C}_8\text{B}_{10}\text{H}_{22}\text{N}_2\text{O}_4\text{Cl}$   $[\text{M}+\text{H}]^+$ : 354.2243. Found: 354.2247.

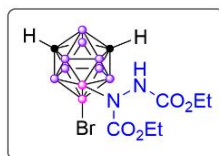

**10j**: Yield 48%; White solid; **Eluent**: PE/EA = 4:1 ( $R_f$  = 0.32).

$^1\text{H}$  NMR (600 MHz,  $\text{CDCl}_3$ )  $\delta$ : 6.80 – 6.45 (m, 1H), 4.20 (s, 4H), 2.90 (s, 1H), 2.86 (s, 1H), 1.32 – 1.20 (m, 6H).  $^{13}\text{C}\{^1\text{H}\}$  NMR (151 MHz,  $\text{CDCl}_3$ )  $\delta$ : 157.8, 156.6, 62.7, 61.8, 49.2, 48.9, 14.3,

14.2.  $^{11}\text{B}\{^1\text{H}\}$  NMR (193 MHz,  $\text{CDCl}_3$ )  $\delta$ : 1.6 (1B), -7.2 (3B), -14.8 (4B), -22.7 (2B).

HRMS (ESI-TOF):  $m/z$  calcd for  $\text{C}_8\text{B}_{10}\text{H}_{22}\text{N}_2\text{O}_4\text{Br}$   $[\text{M}+\text{H}]^+$ : 398.1750. Found: 398.1751.

## 4. References

1. Bai, F.; Yan, H. **2021**. DOI:10.27235/d.cnki.gnjju.2021.002442.
2. Chena, J.; Chena, S.; Tanga, Y.; Moub, C.; Tsaia, F. *J. Mol. Catal. A. Chem.* **2009**, *307*, 88–92.
3. Falconnet, A.; Arndt, J.; Hashmi, A. S. K.; Schaub, T. *Eur. J. Org. Chem.* **2022**, e202200477, 1-5.
4. Ma, Y.-N.; Ren, H.; Wu, Y.; Li, N.; Chen, F.; Chen, X.-N. *J. Am. Chem. Soc.* **2023**, *145*, 7331–7342.
5. Lu, W.; Wu, Y.; Ma, Y.-N.; Chen, F.; Chen, X.-N. *Inorg. Chem.* **2023**, *62*, 885–892.
6. Wang, Y.; Gao, Y.; Guo, W.; Zhao, Q.-Y.; Ma, Y.-N.; Chen, X.-N. *Org. Chem. Front.*, **2022**, *9*, 4975–4980.

## 5. X-ray Structure Determination

Single crystal XRD analysis of the **7a** compound was recorded on a SuperNova Dual diffractometer using graphite-monochromated  $\text{Cu K}\alpha$  radiation,  $\lambda = 1.54184 \text{ \AA}$ . The linear absorption coefficients, scattering factors for the atoms, and anomalous dispersion corrections were taken from the International Tables for X-Ray Crystallography. Empirical absorption corrections were applied. Structures were solved using direct methods (SHELXT) and refined by full-matrix least-squares (SHELXL) interfaced with the programme OLEX2. Crystal data and details of data collection and structure refinements are given in **Table S2**.

Further details on the crystal structure investigations can be obtained free of charge from The Cambridge Crystallographic Data Centre via <https://www.ccdc.cam.ac.uk/structures/> by quoting the depository numbers CCDC- 2358875 (**7a**).

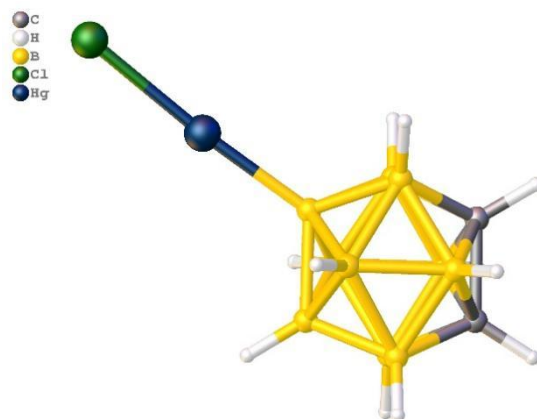

**Figure S2.** Molecular Structure of **7a**

**Table S1.** Crystal Data and Summary of Data Collection and Refinement.

| compound                           | <b>7a</b>                                                |
|------------------------------------|----------------------------------------------------------|
| formula                            | C <sub>2</sub> H <sub>11</sub> B <sub>10</sub> ClHg      |
| Formula weight                     | 379.25                                                   |
| Temperature/K                      | 293(2)                                                   |
| Crystal system                     | monoclinic                                               |
| Space group                        | P2 <sub>1</sub> /n                                       |
| a/Å                                | 6.73953(18)                                              |
| b/Å                                | 21.6921(6)                                               |
| c/Å                                | 7.3452(2)                                                |
| α/°                                | 90                                                       |
| β/°                                | 91.737(2)                                                |
| γ/°                                | 90                                                       |
| Volume/Å <sup>3</sup>              | 1073.33(5)                                               |
| Z                                  | 4                                                        |
| ρ <sub>calc</sub> /cm <sup>3</sup> | 2.347                                                    |
| μ/mm <sup>-1</sup>                 | 27.444                                                   |
| F(000)                             | 680.0                                                    |
| Crystal size/mm <sup>3</sup>       | 0.138 × 0.123 × 0.059                                    |
| Radiation                          | Cu Kα (λ = 1.54184)                                      |
| Reflections collected              | 3825                                                     |
| Independent reflections            | [R <sub>int</sub> = 0.0512, R <sub>sigma</sub> = 0.0634] |
| Goodness-of-fit on F <sup>2</sup>  | 1.044                                                    |
| Final R indexes [I ≥ 2σ (I)]       | R1 = 0.0434, wR2 = 0.1166                                |
| Final R indexes [all data]         | R1 = 0.0508, wR2 = 0.1238                                |

# 6. NMR spectra

7.44  
7.43  
7.26  
7.24  
7.23  
7.23

3.50  
3.41

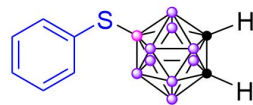

1a

<sup>1</sup>H NMR (600 MHz, CDCl<sub>3</sub>)

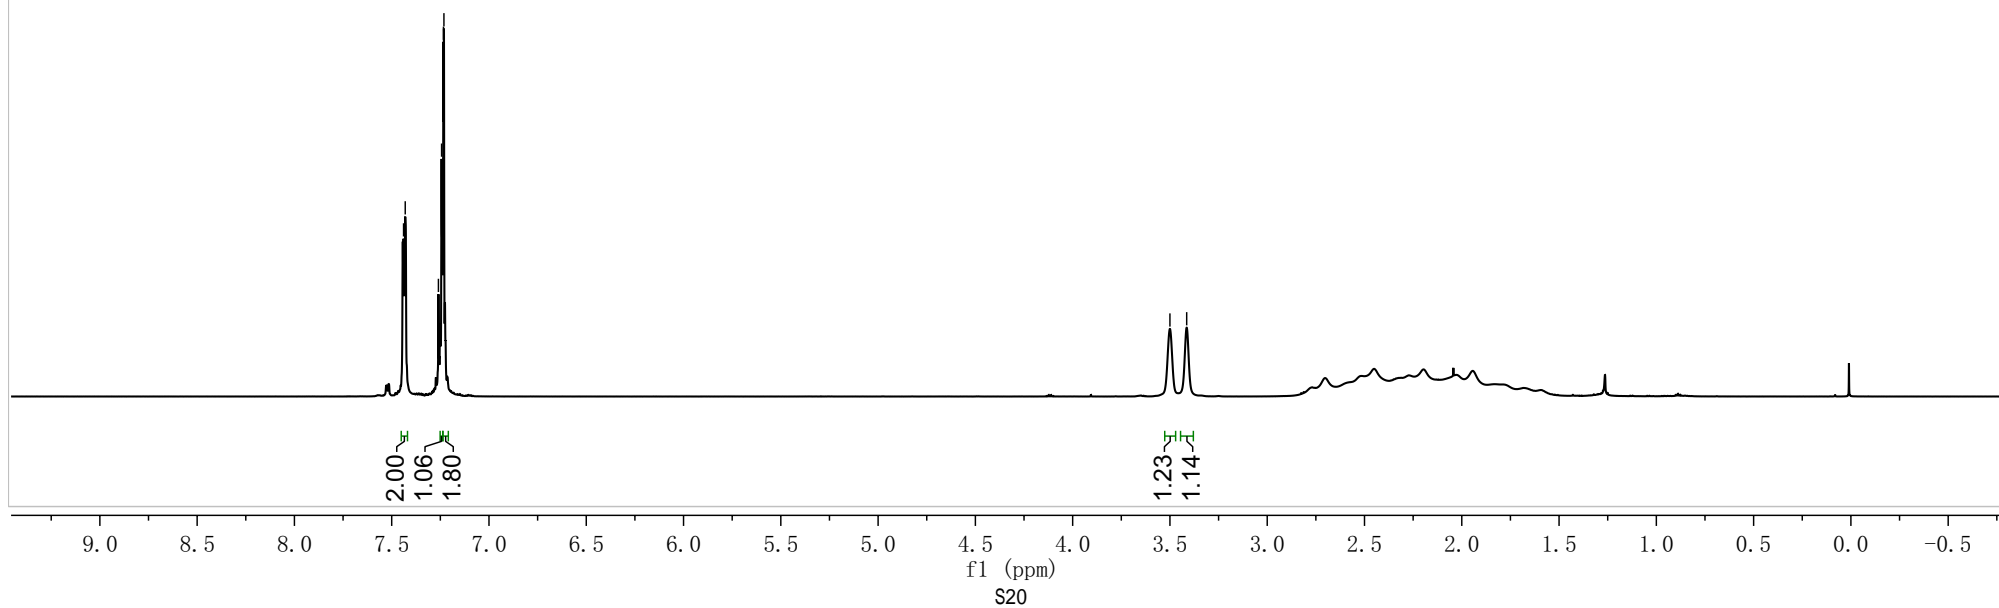

7.44  
7.43  
7.26  
7.24  
7.23

3.50  
3.42

2.40  
2.33  
2.27  
2.19  
2.08

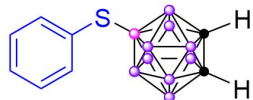

**1a**

$^1\text{H}\{^{11}\text{B}\}$  NMR (600 MHz,  $\text{CDCl}_3$ )

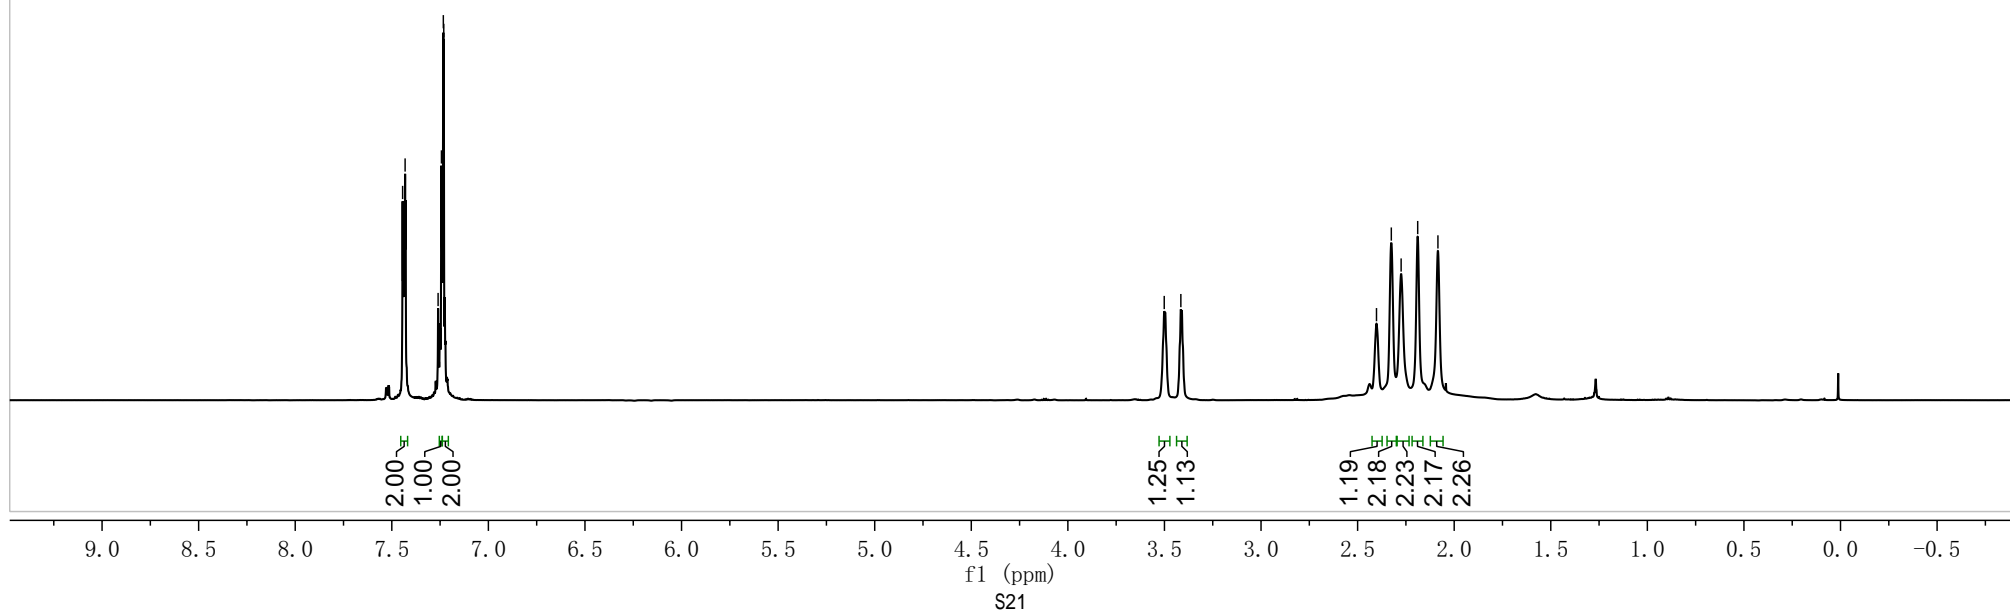

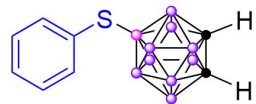

**1a**

$^{11}\text{B}$  NMR (193 MHz,  $\text{CDCl}_3$ )

—7.45

—1.87

—2.65

—8.23

—9.02

—13.48

—14.22

—15.03

—16.01

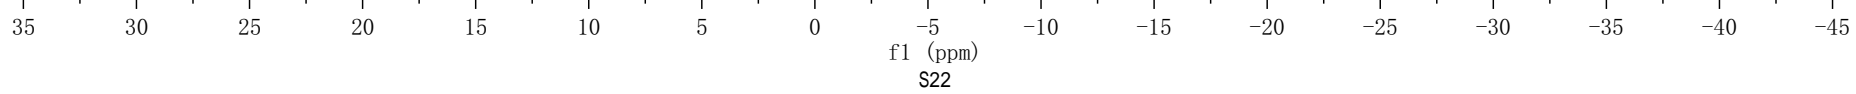



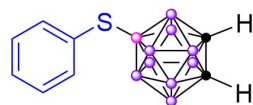

**1a**

$^{11}\text{B}\{^1\text{H}\}$  NMR (193 MHz,  $\text{CDCl}_3$ )

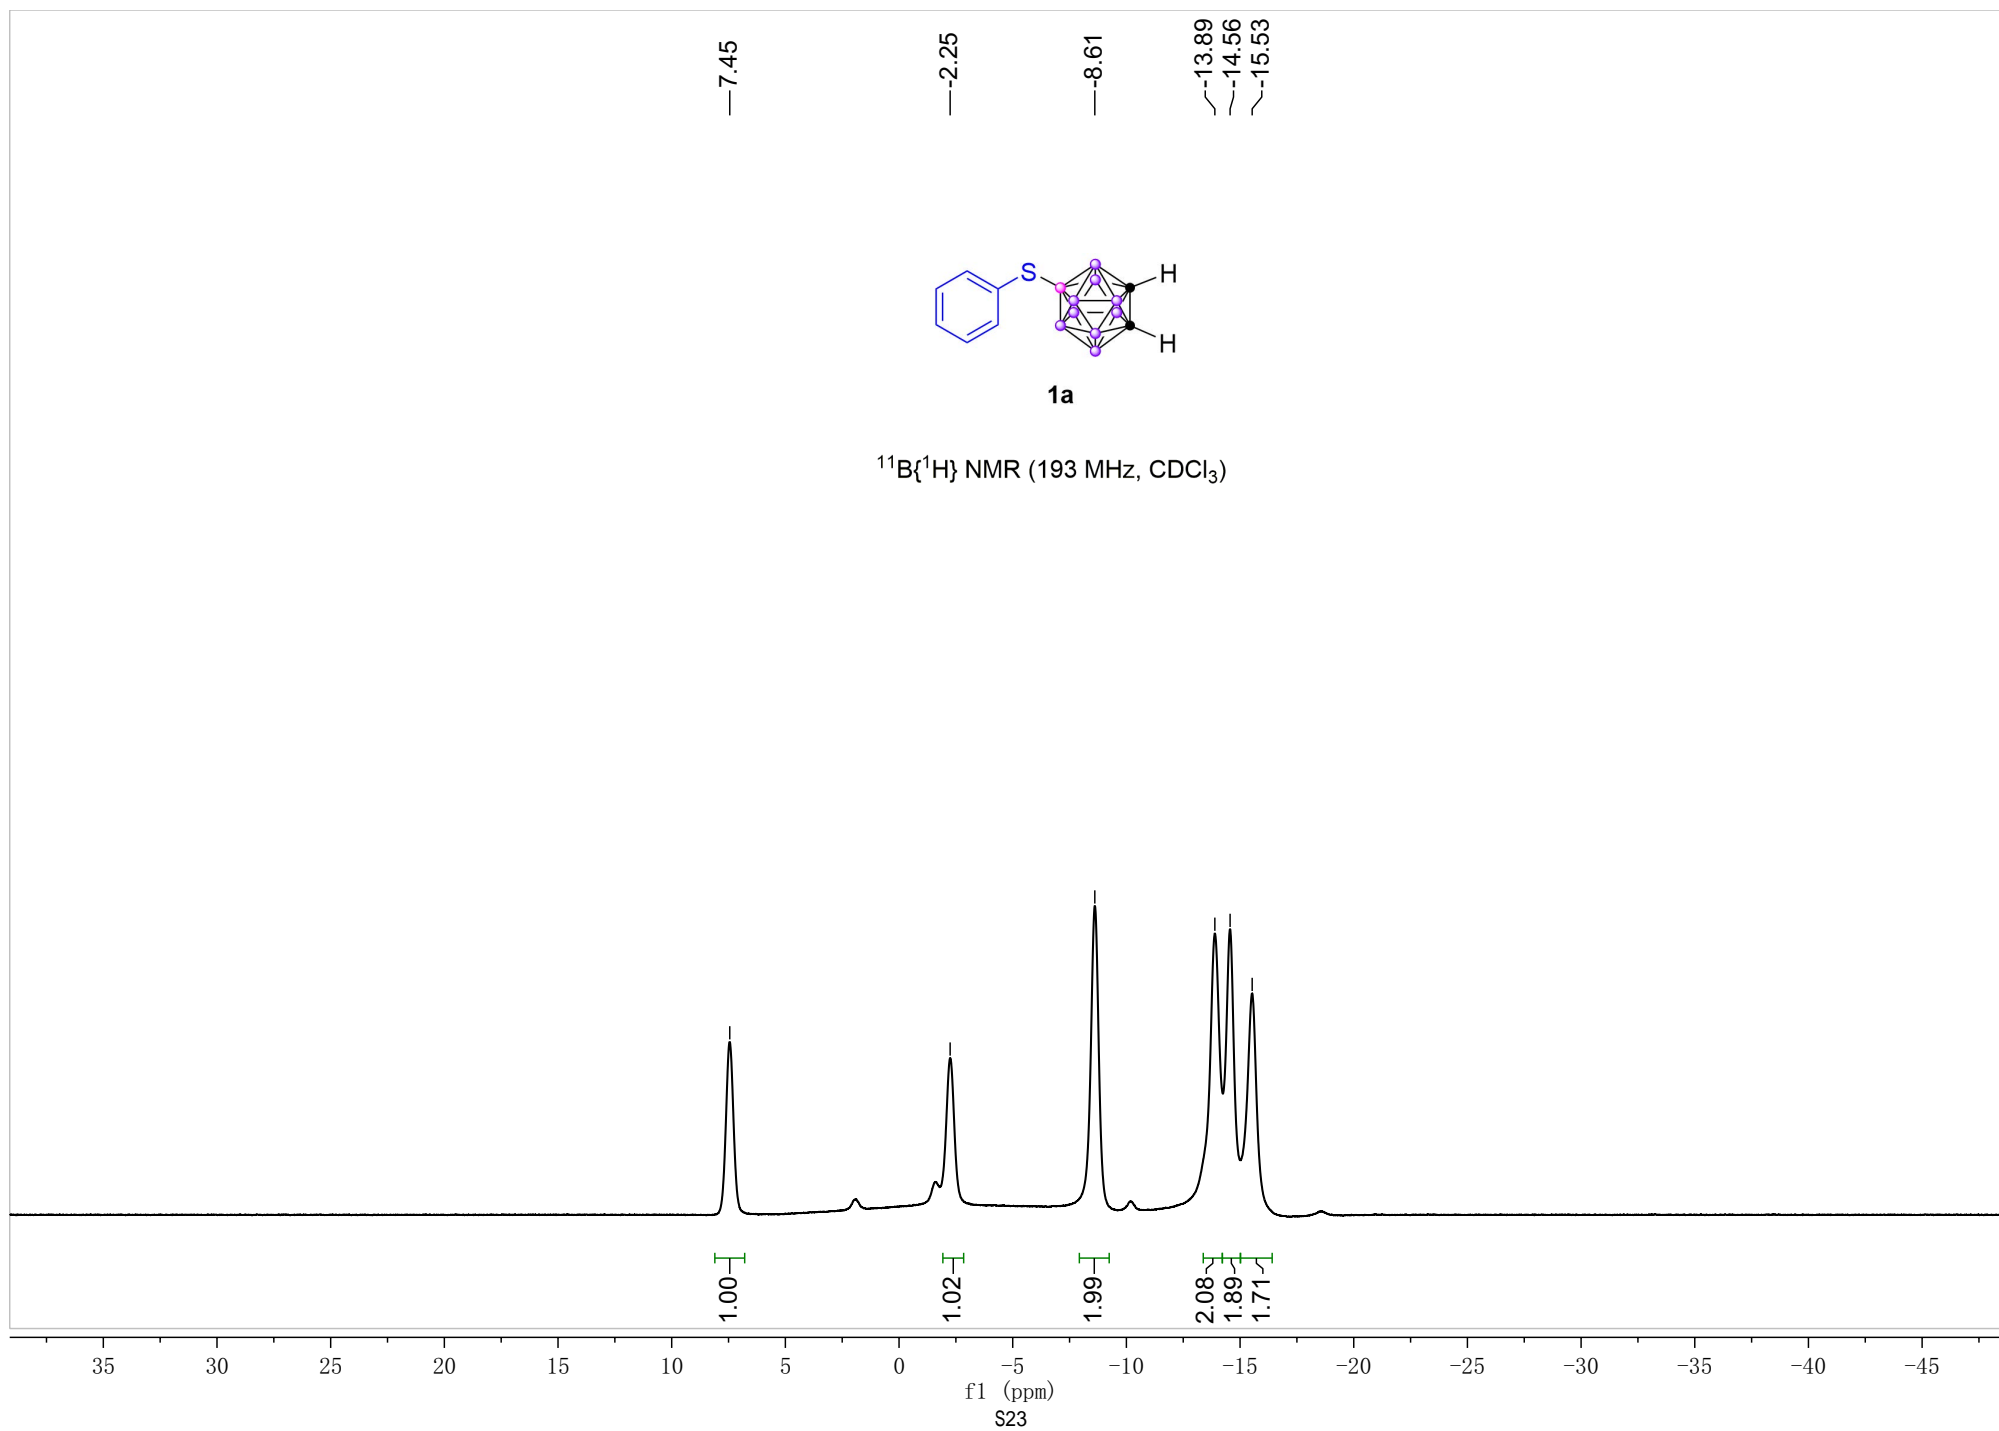

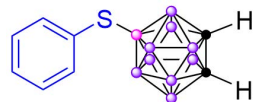

**1a**

$^{13}\text{C}$  NMR (151 MHz,  $\text{CDCl}_3$ )

135.36  
134.90  
128.51  
126.92

77.21  
77.00  
76.79

52.70  
47.47

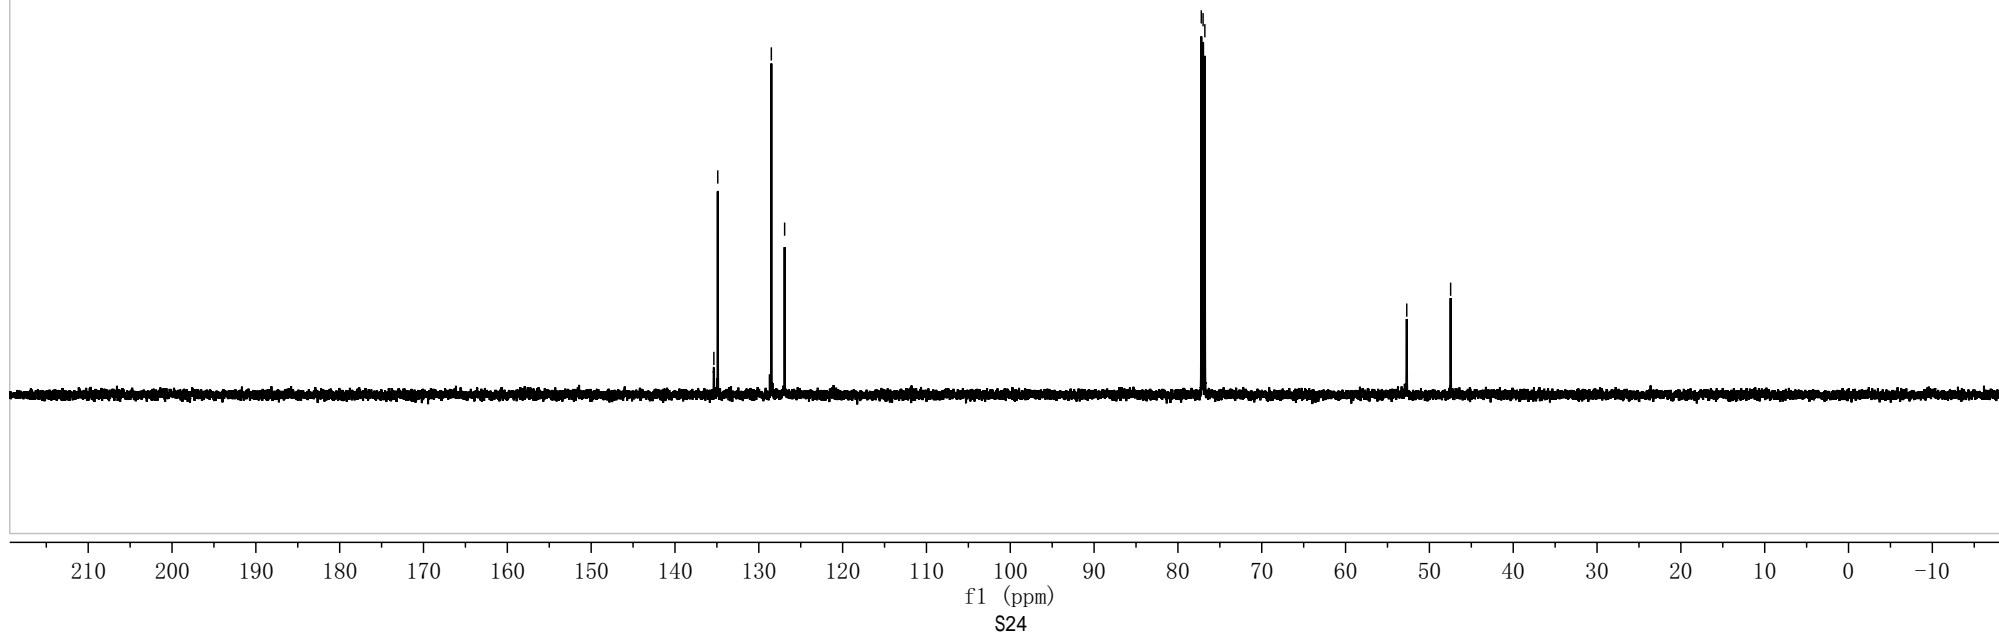

7.45  
7.44  
7.36  
7.26  
7.25  
7.23  
7.23

1.99  
1.98

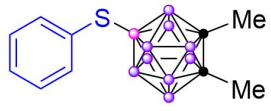

1b

<sup>1</sup>H NMR (600 MHz, CDCl<sub>3</sub>)

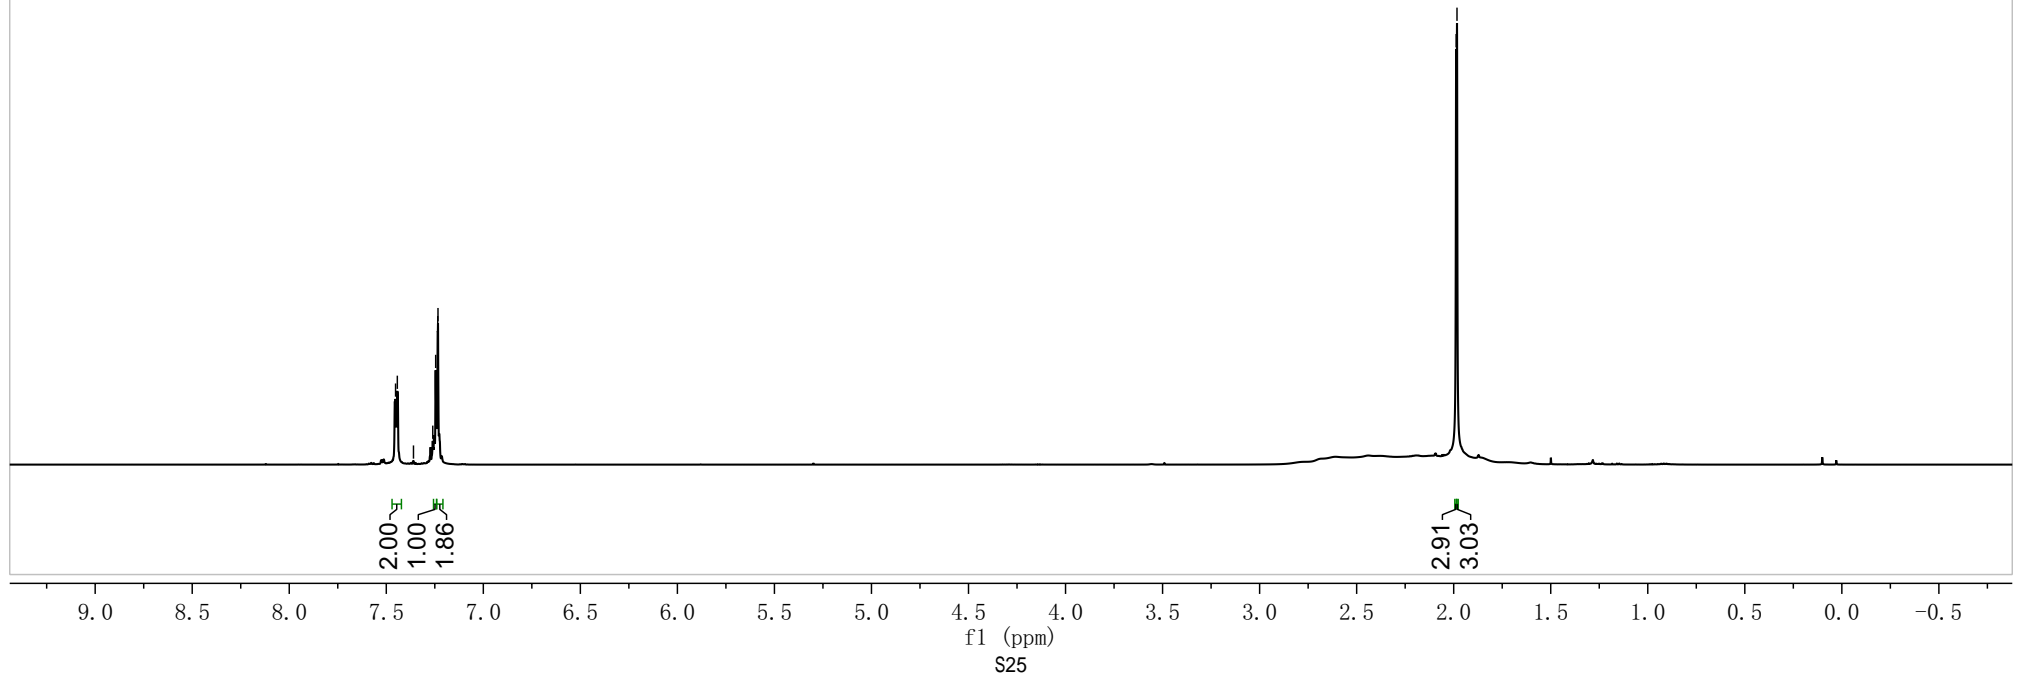

7.45  
7.44  
7.36  
7.26  
7.25  
7.23

2.38  
2.32  
2.25  
2.14  
1.99  
1.98

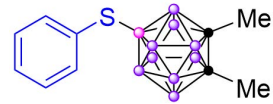

1b

$^1\text{H}\{^{11}\text{B}\}$  NMR (600 MHz,  $\text{CDCl}_3$ )

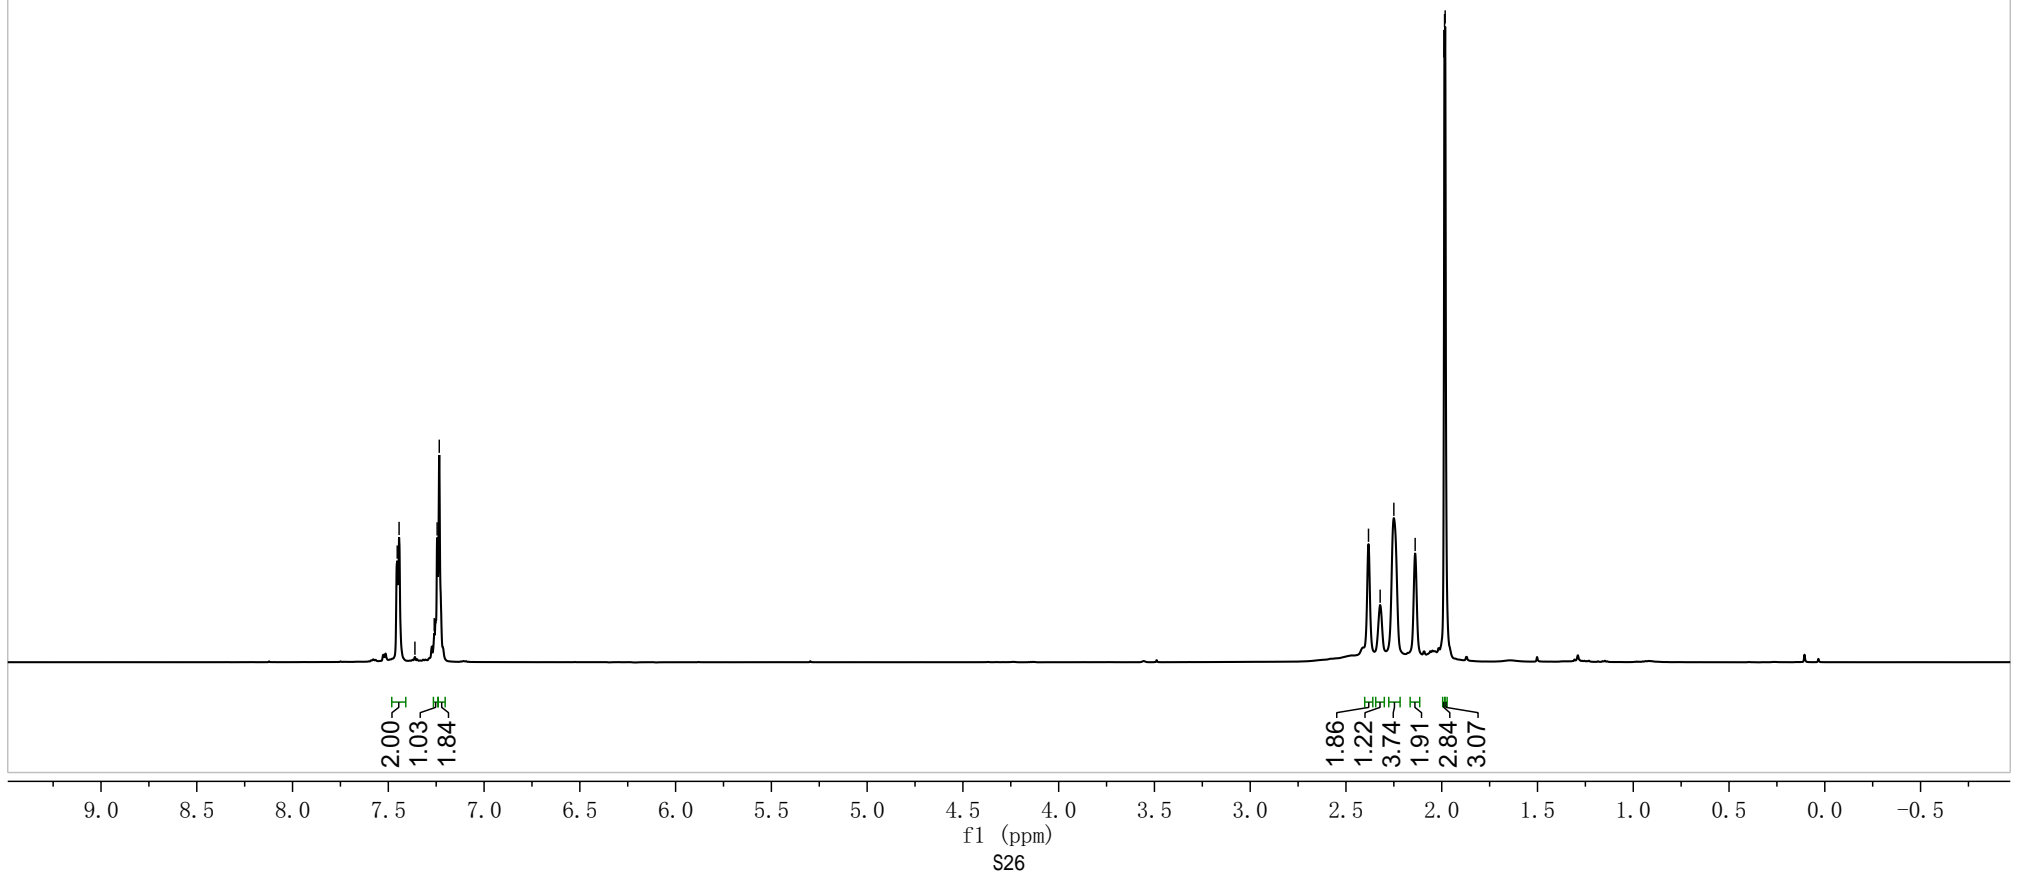

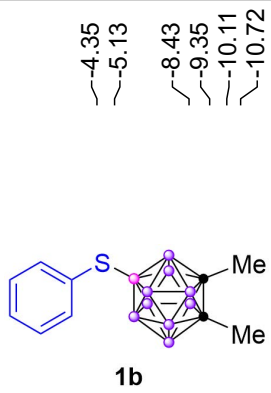

$^{11}\text{B}$  NMR (193 MHz,  $\text{CDCl}_3$ )

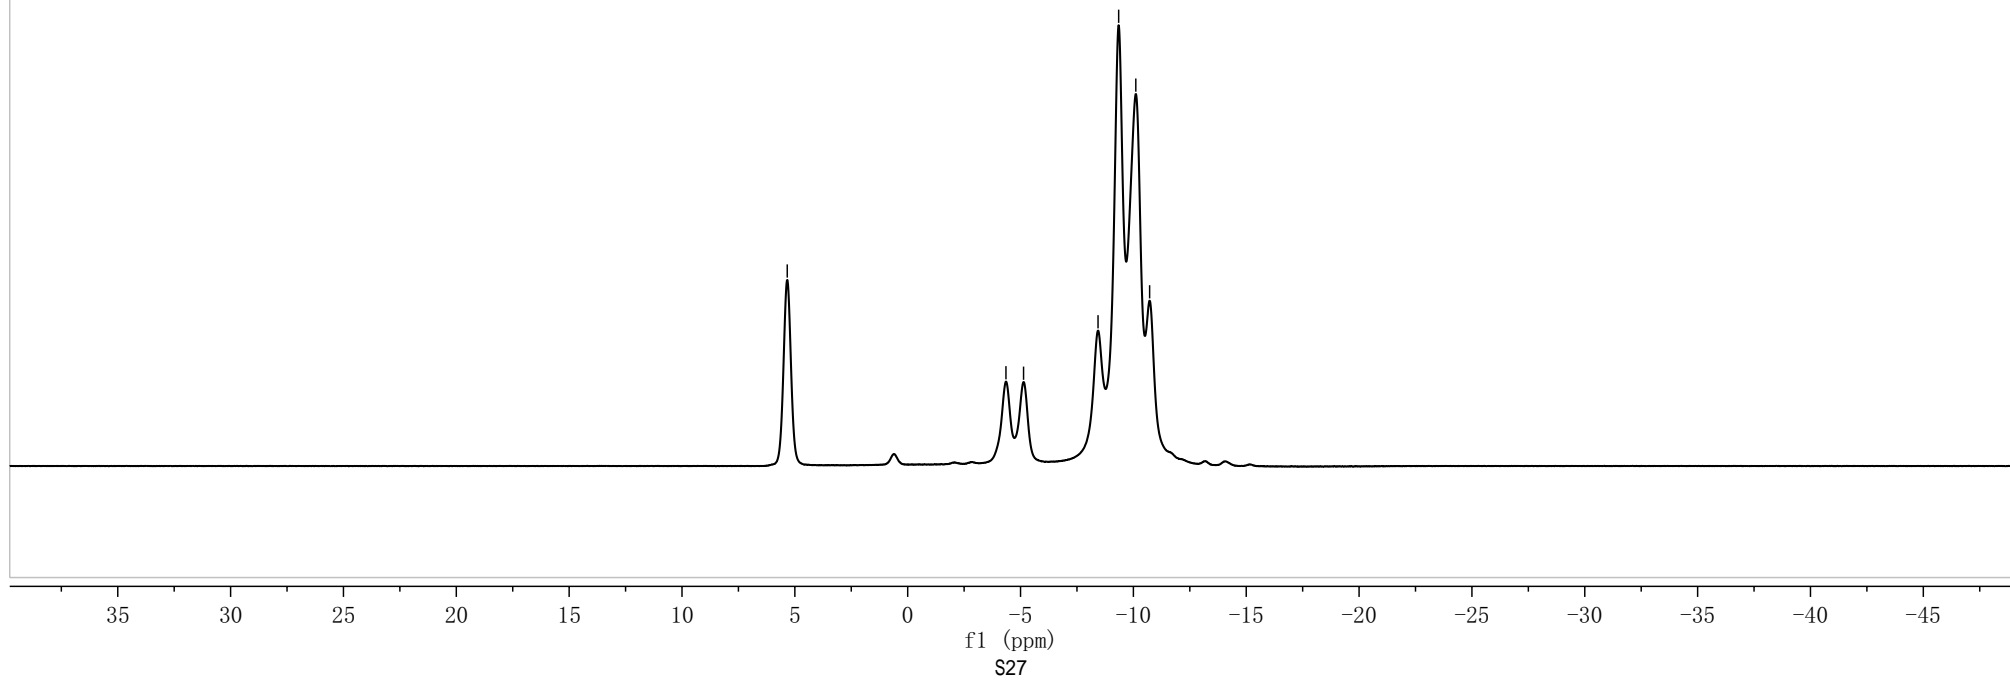

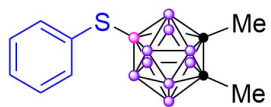

**1b**

$^{11}\text{B}\{^1\text{H}\}$  NMR (193 MHz,  $\text{CDCl}_3$ )

—5.33

—4.75

—8.88

—9.75

—10.28

1.00

1.13

1.91

4.02

1.98

35 30 25 20 15 10 5 0 f1 (ppm) -5 -10 -15 -20 -25 -30 -35 -40 -45

S28

135.75  
134.81  
128.38  
126.71

77.21  
77.00  
76.79  
71.85  
66.47

23.21  
21.93

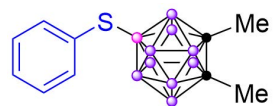

**1b**

<sup>13</sup>C NMR (151 MHz, CDCl<sub>3</sub>)

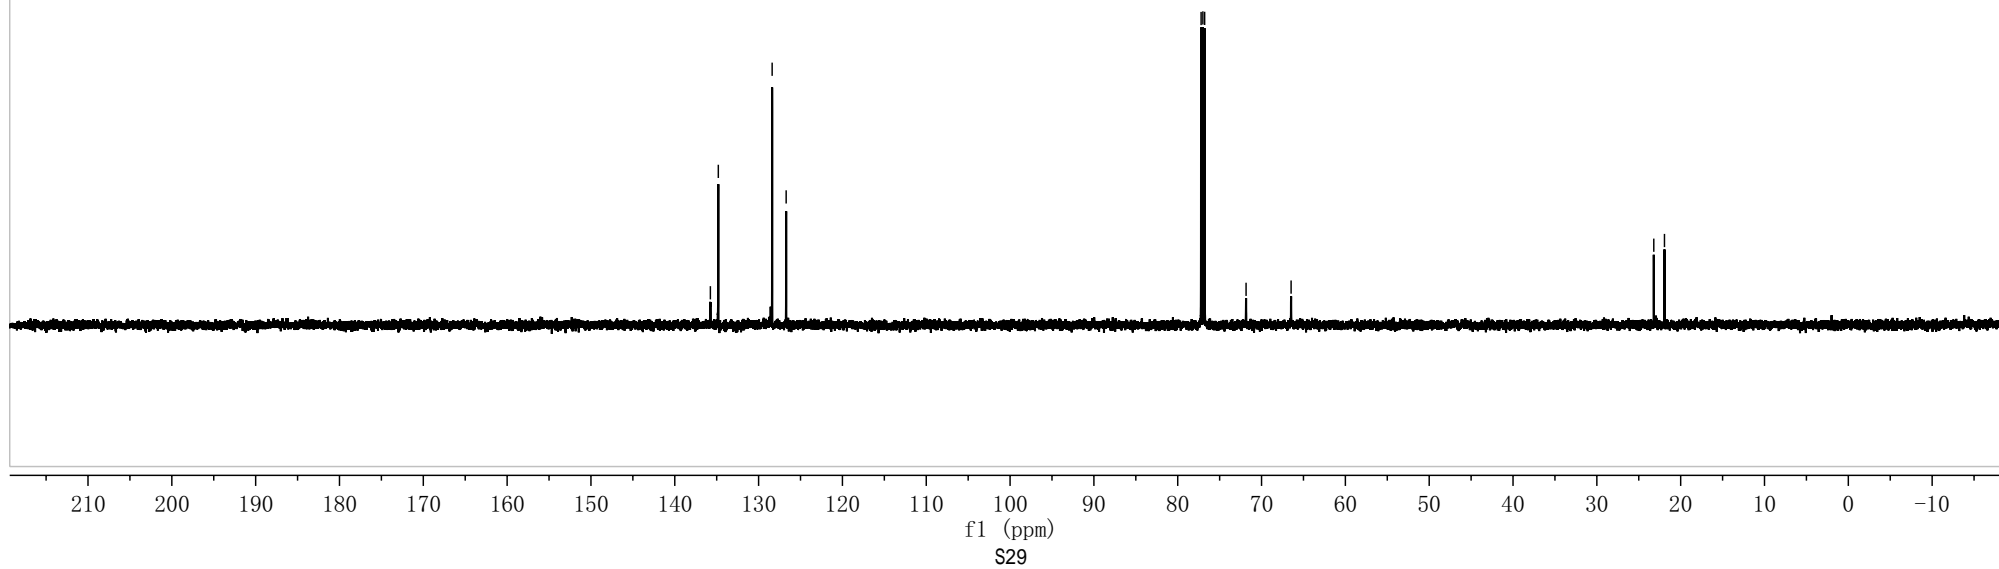

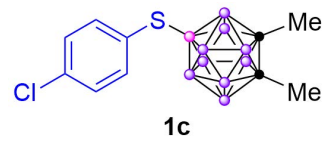

$^1\text{H}$  NMR (600 MHz,  $\text{CDCl}_3$ )

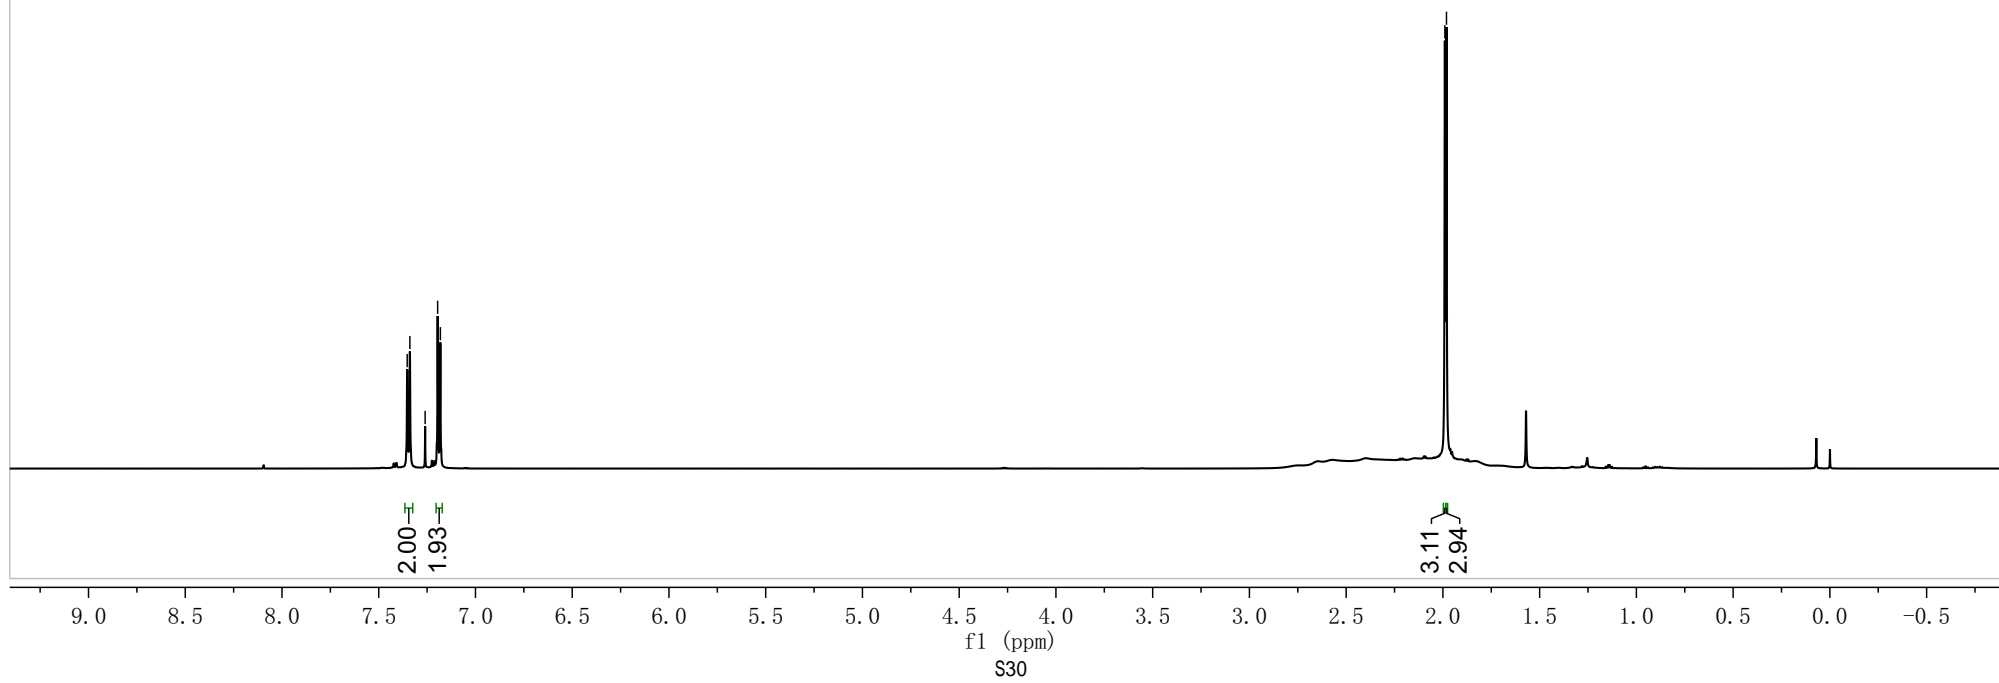



7.35  
7.34  
7.26  
7.20  
7.18

2.35  
2.28  
2.24  
2.20  
2.12  
1.99  
1.98

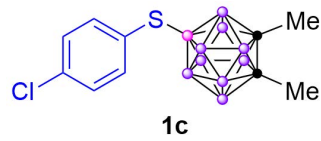

$^1\text{H}\{^{11}\text{B}\}$  NMR (600 MHz,  $\text{CDCl}_3$ )

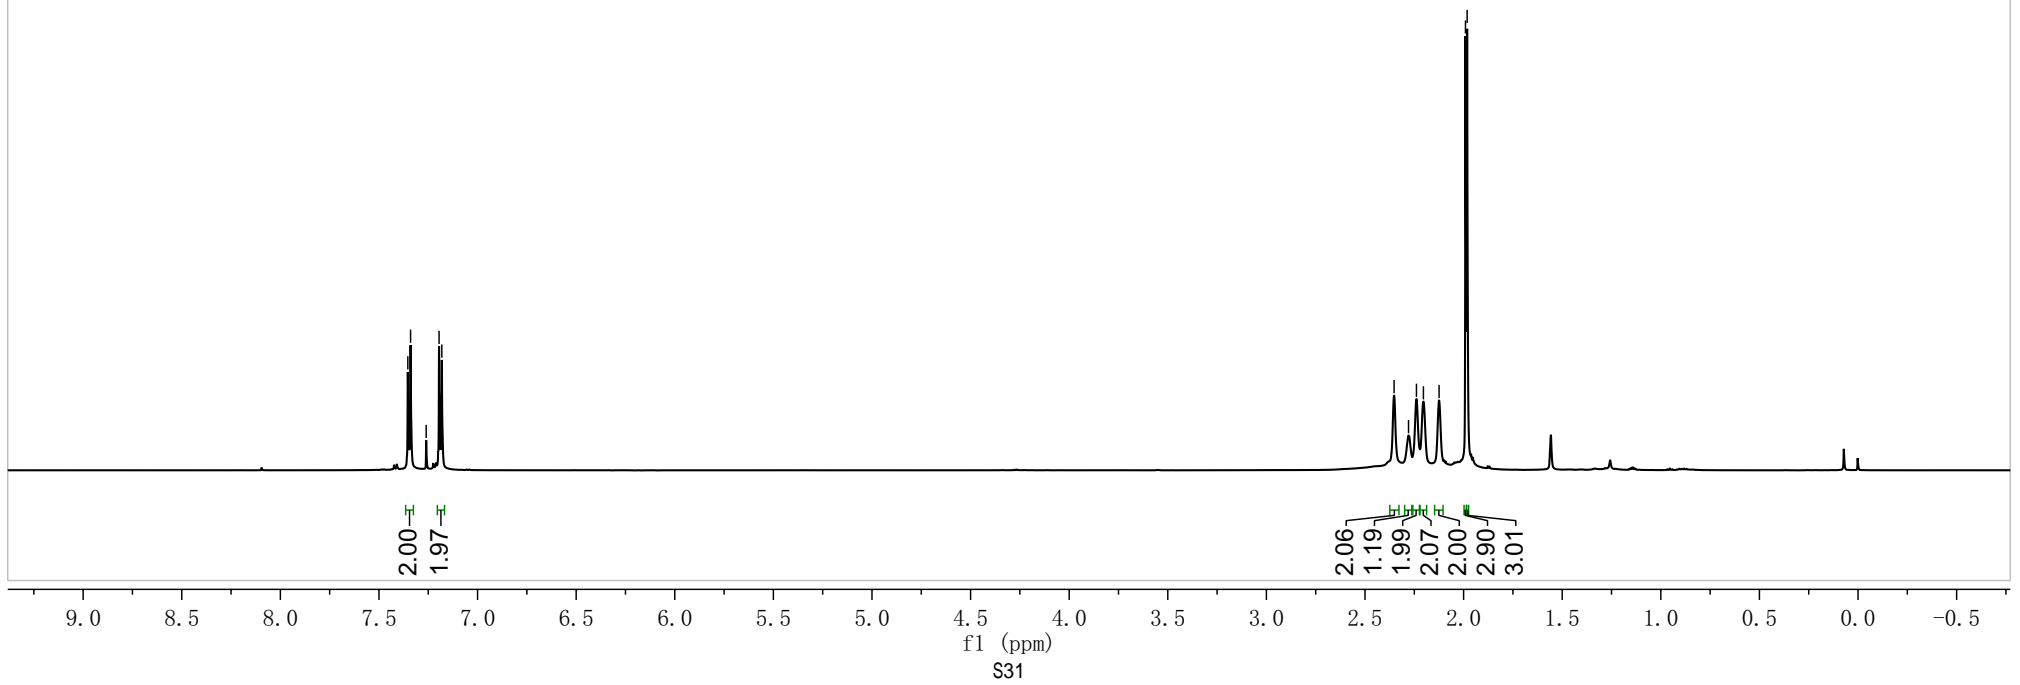

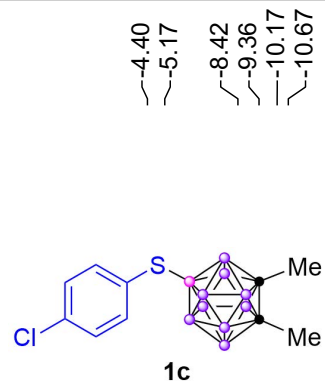

<sup>11</sup>B NMR (193 MHz, CDCl<sub>3</sub>)

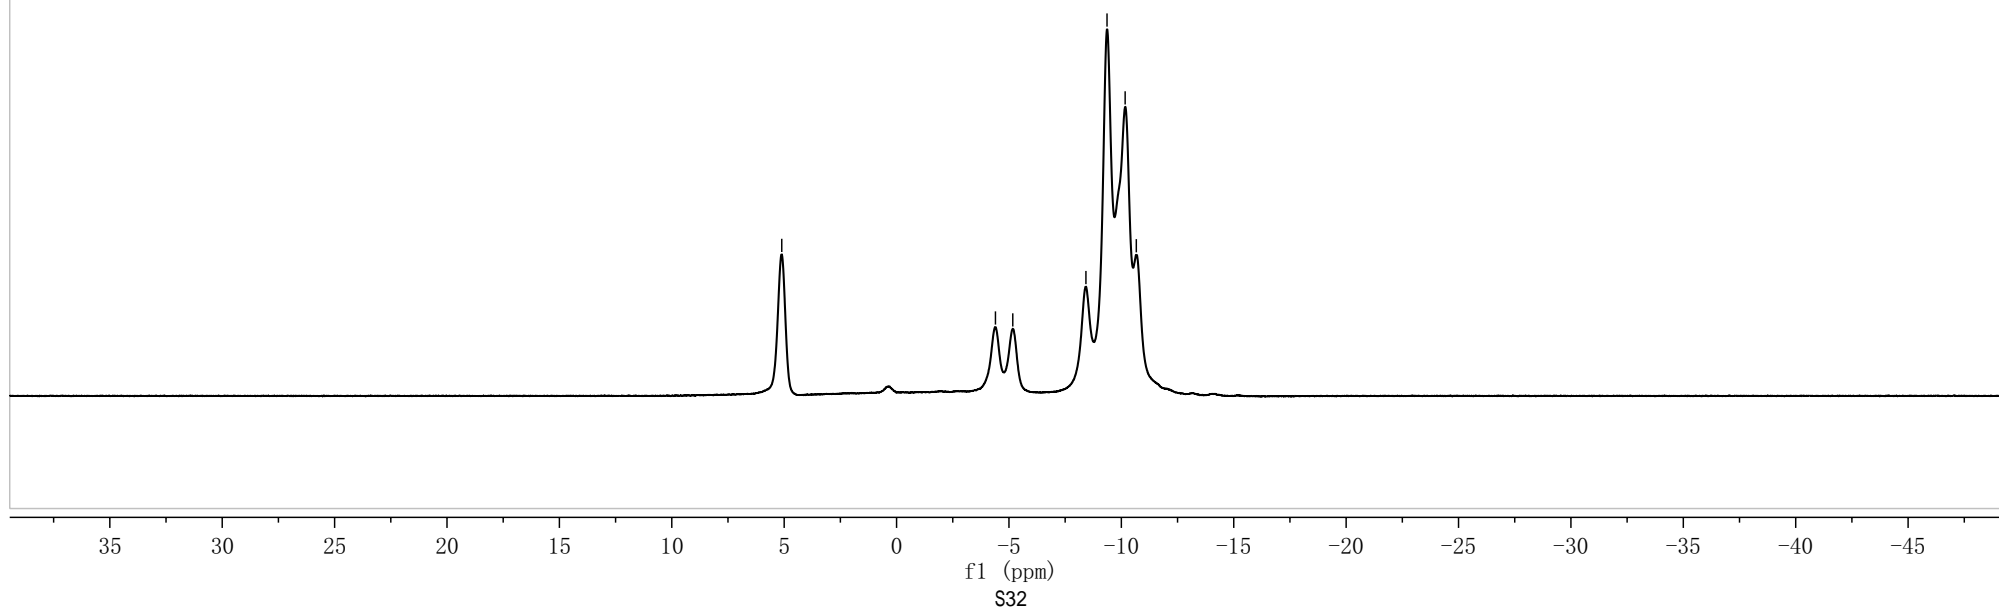

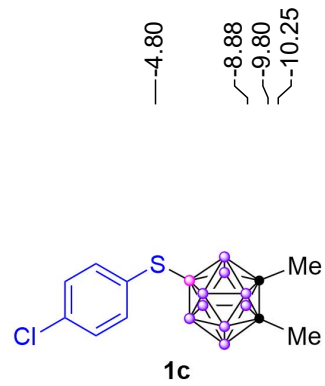

$^{11}\text{B}\{^1\text{H}\}$  NMR (193 MHz,  $\text{CDCl}_3$ )

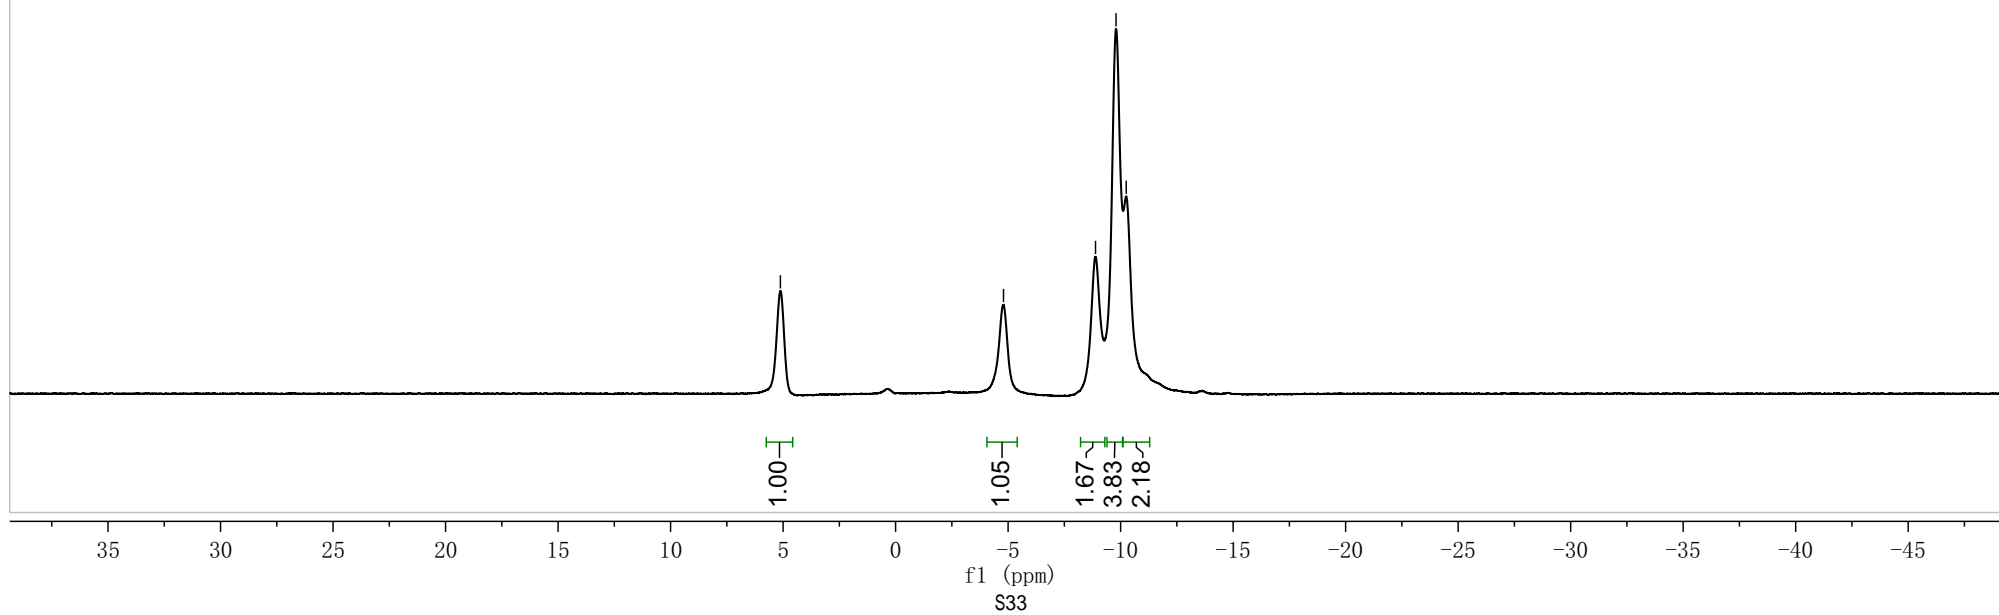

136.13  
134.38  
132.92  
128.56

77.21  
77.00  
76.79  
71.94  
66.72

23.24  
21.98

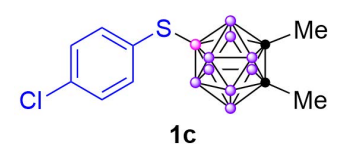

<sup>13</sup>C NMR (151 MHz, CDCl<sub>3</sub>)

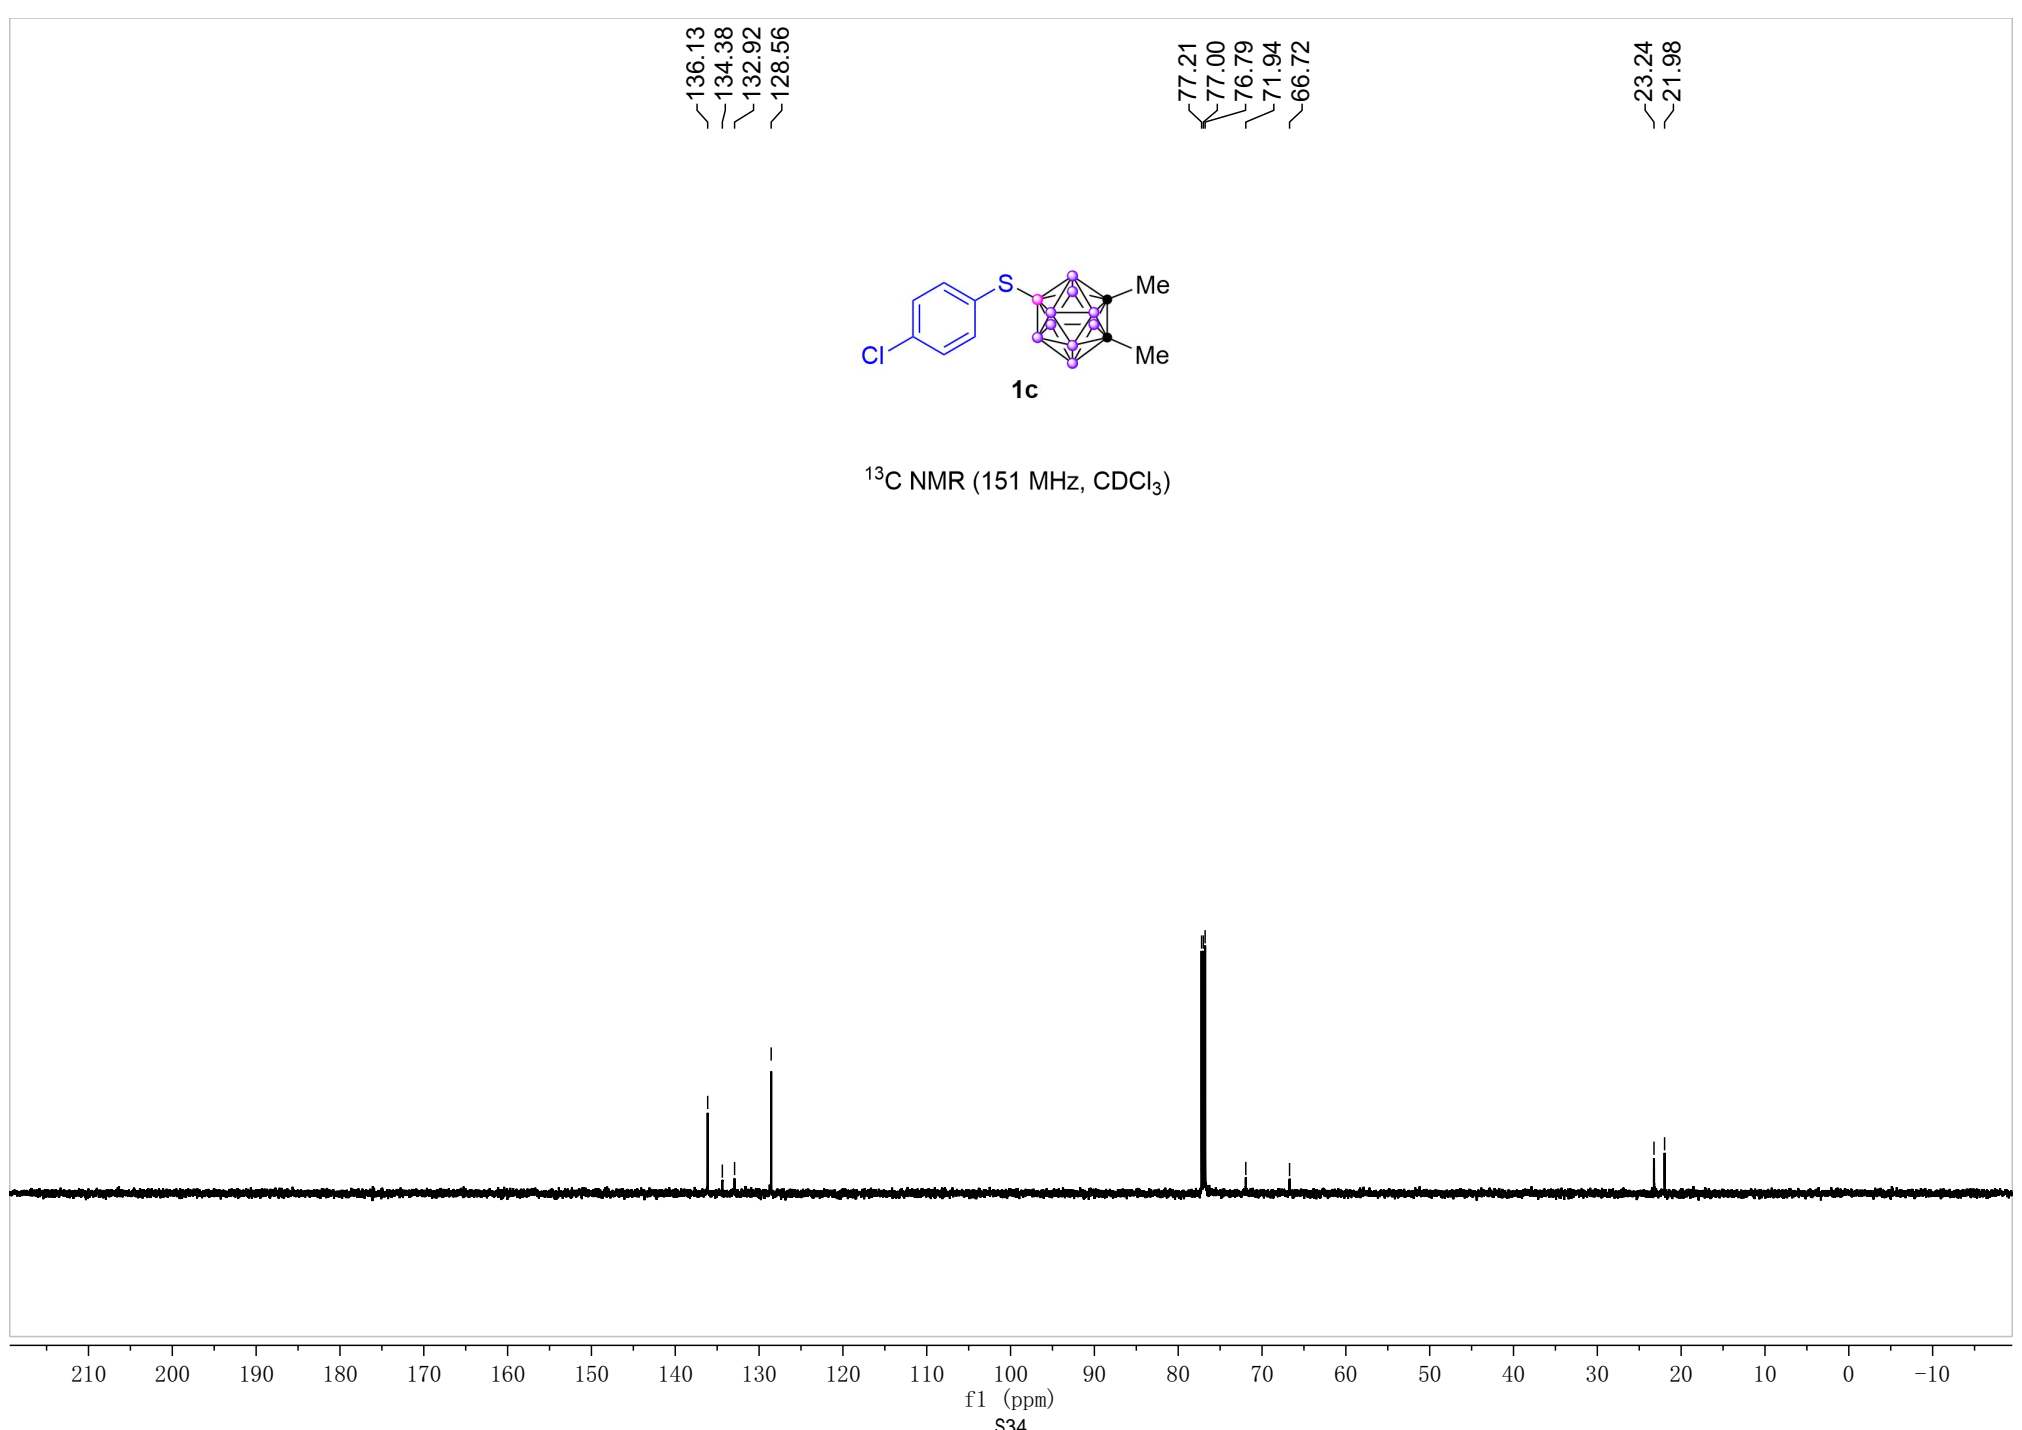

7.35  
7.33  
7.29  
7.28  
7.26

1.99  
1.98

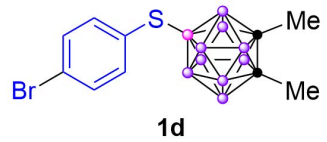

<sup>1</sup>H NMR (600 MHz, CDCl<sub>3</sub>)

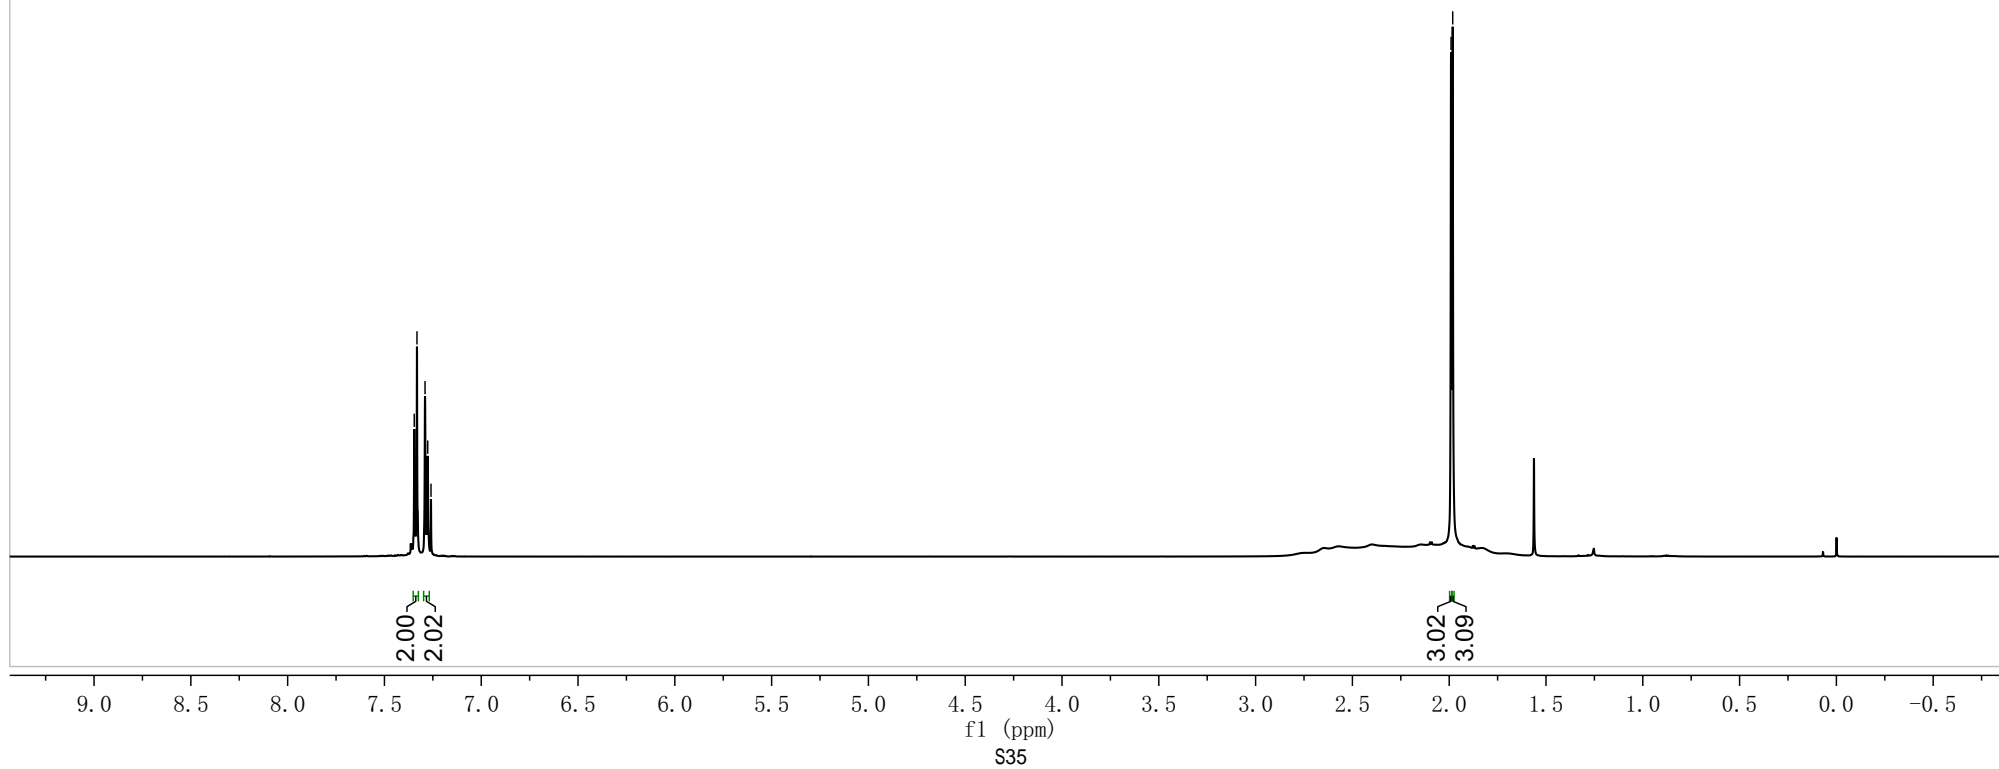

7.35  
7.33  
7.29  
7.28  
7.26

2.35  
2.28  
2.24  
2.20  
2.12  
1.99  
1.98

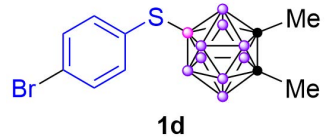

$^1\text{H}\{^{11}\text{B}\}$  NMR (600 MHz,  $\text{CDCl}_3$ )

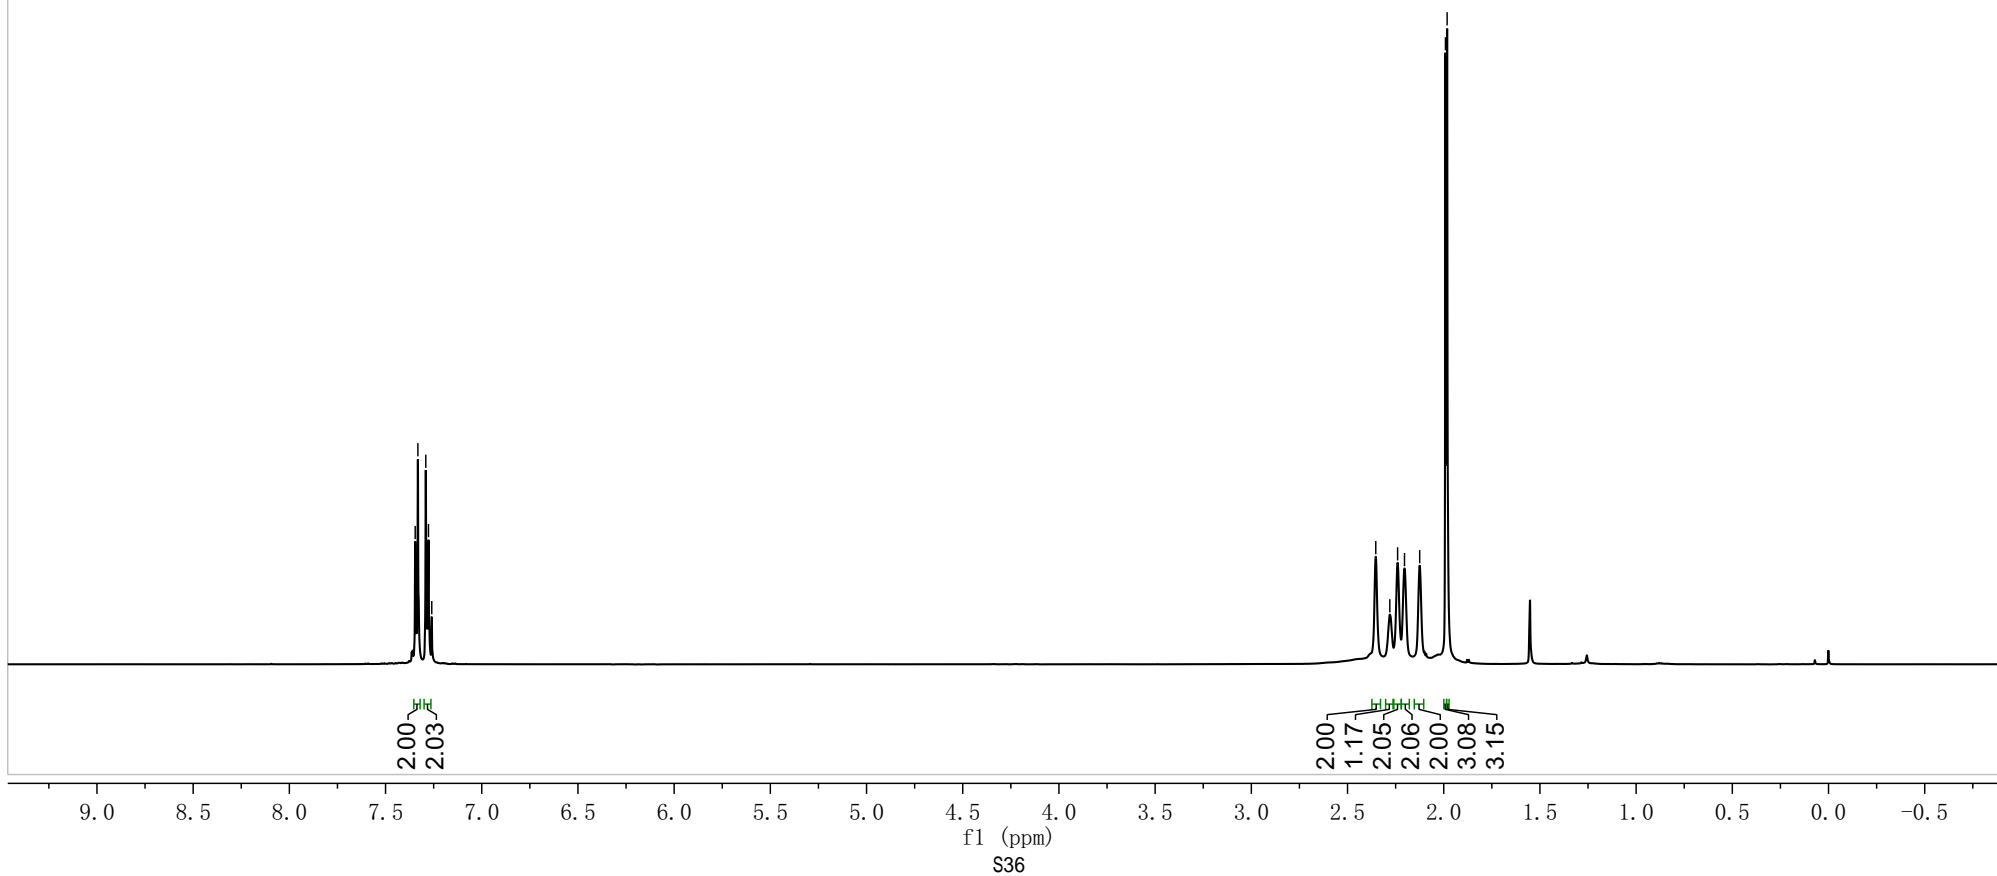

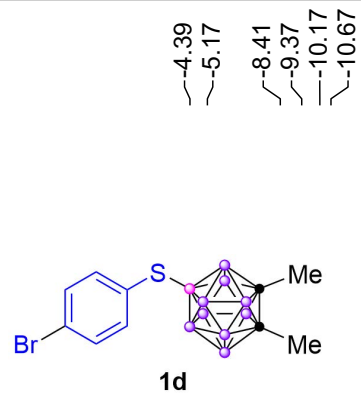

$^{11}\text{B}$  NMR (193 MHz,  $\text{CDCl}_3$ )

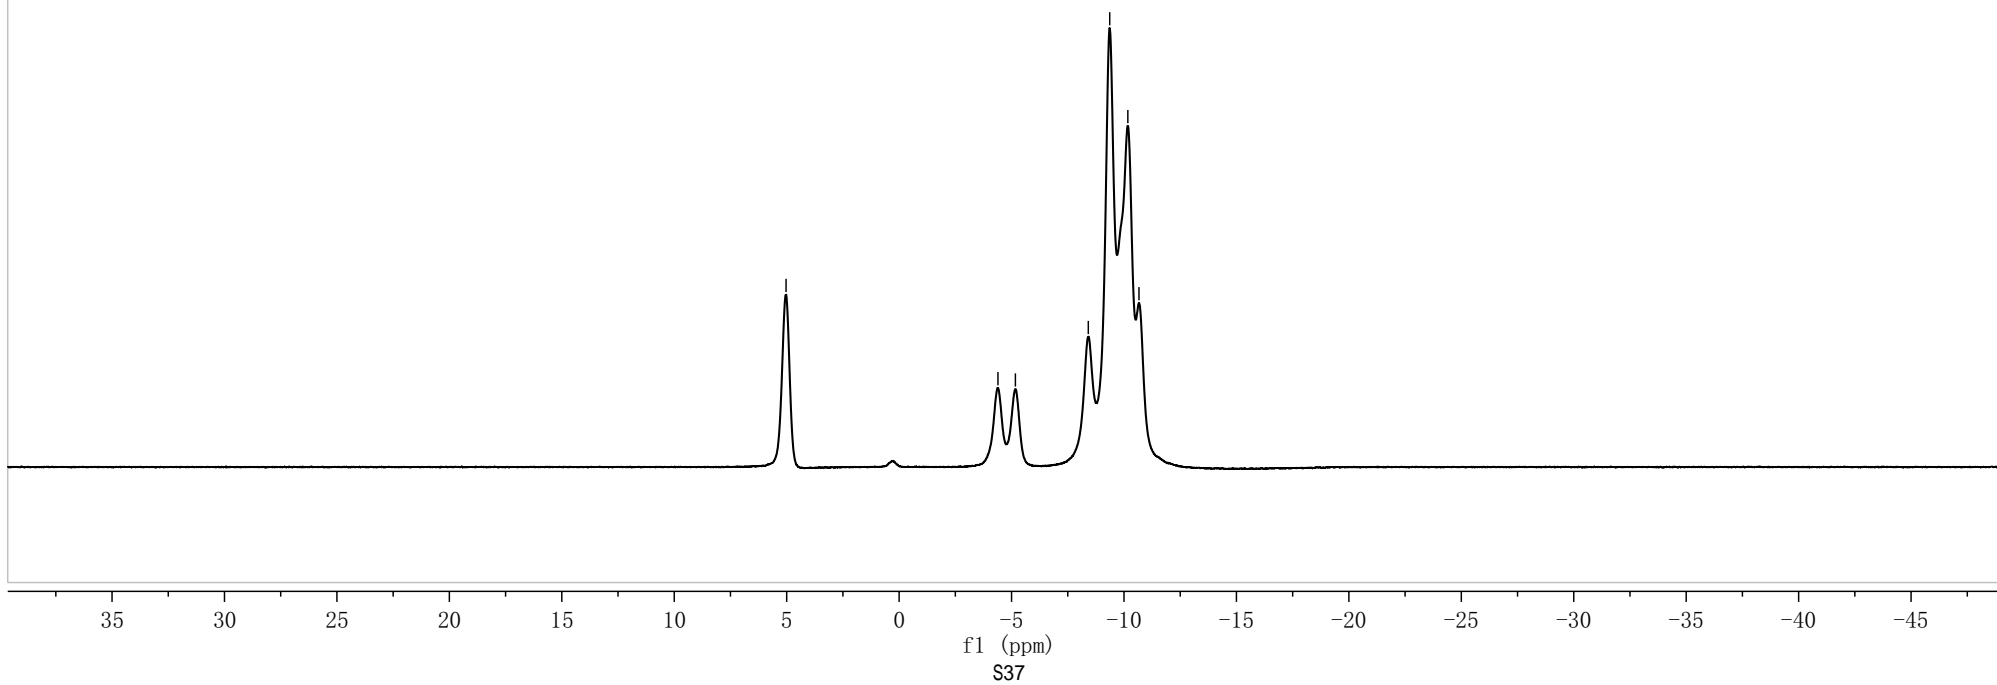

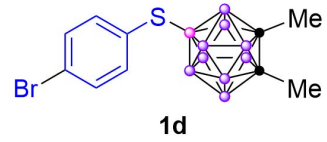

$^{11}\text{B}\{^1\text{H}\}$  NMR (193 MHz,  $\text{CDCl}_3$ )

5.03  
4.79  
8.88  
9.80  
10.24

1.00  
1.02  
1.79  
3.97  
1.96

f1 (ppm)  
S38

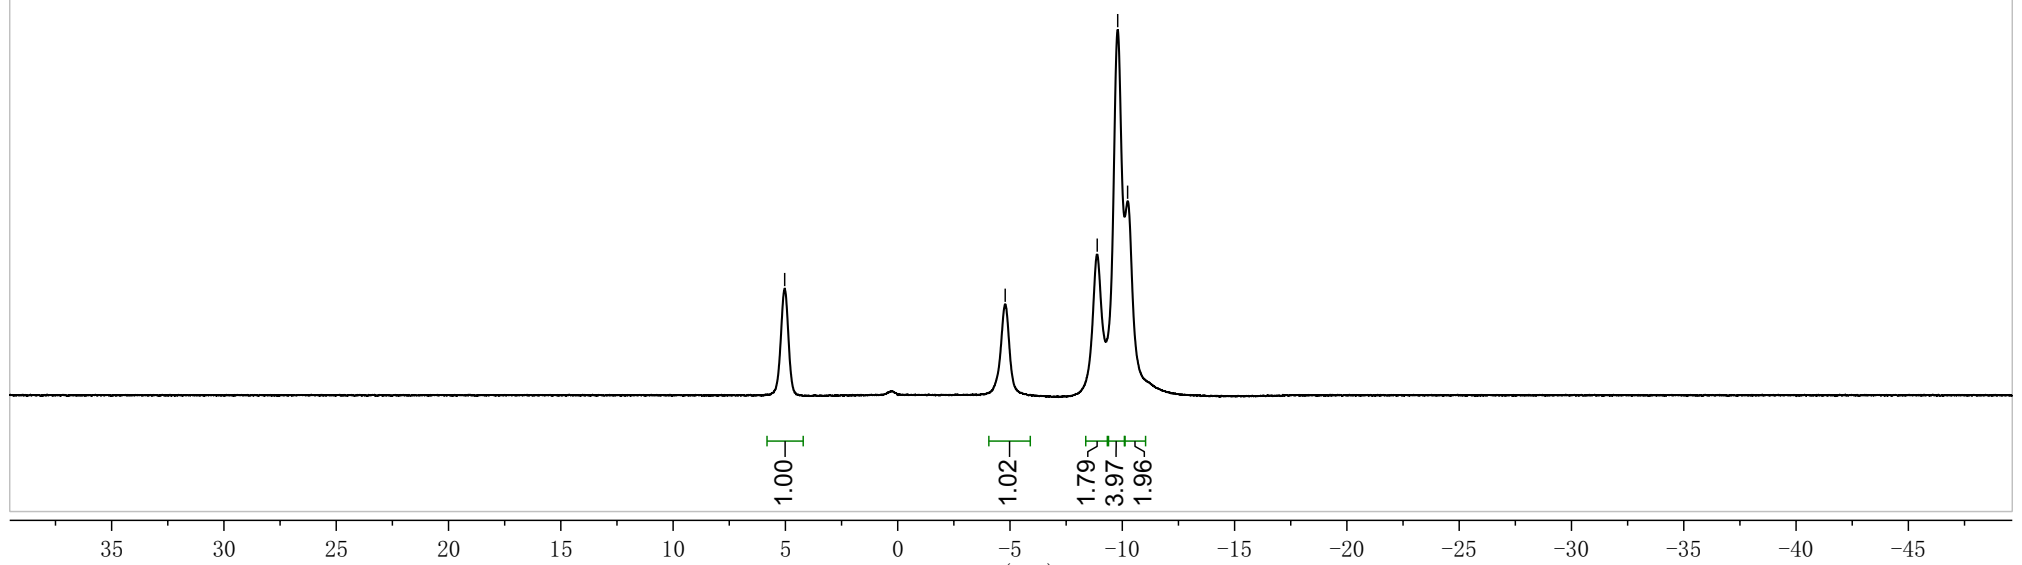



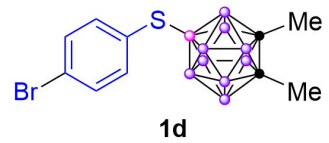

<sup>13</sup>C NMR (151 MHz, CDCl<sub>3</sub>)

136.46  
135.04  
131.50  
121.06  
77.21  
77.00  
76.79  
71.94  
66.74  
23.25  
21.99

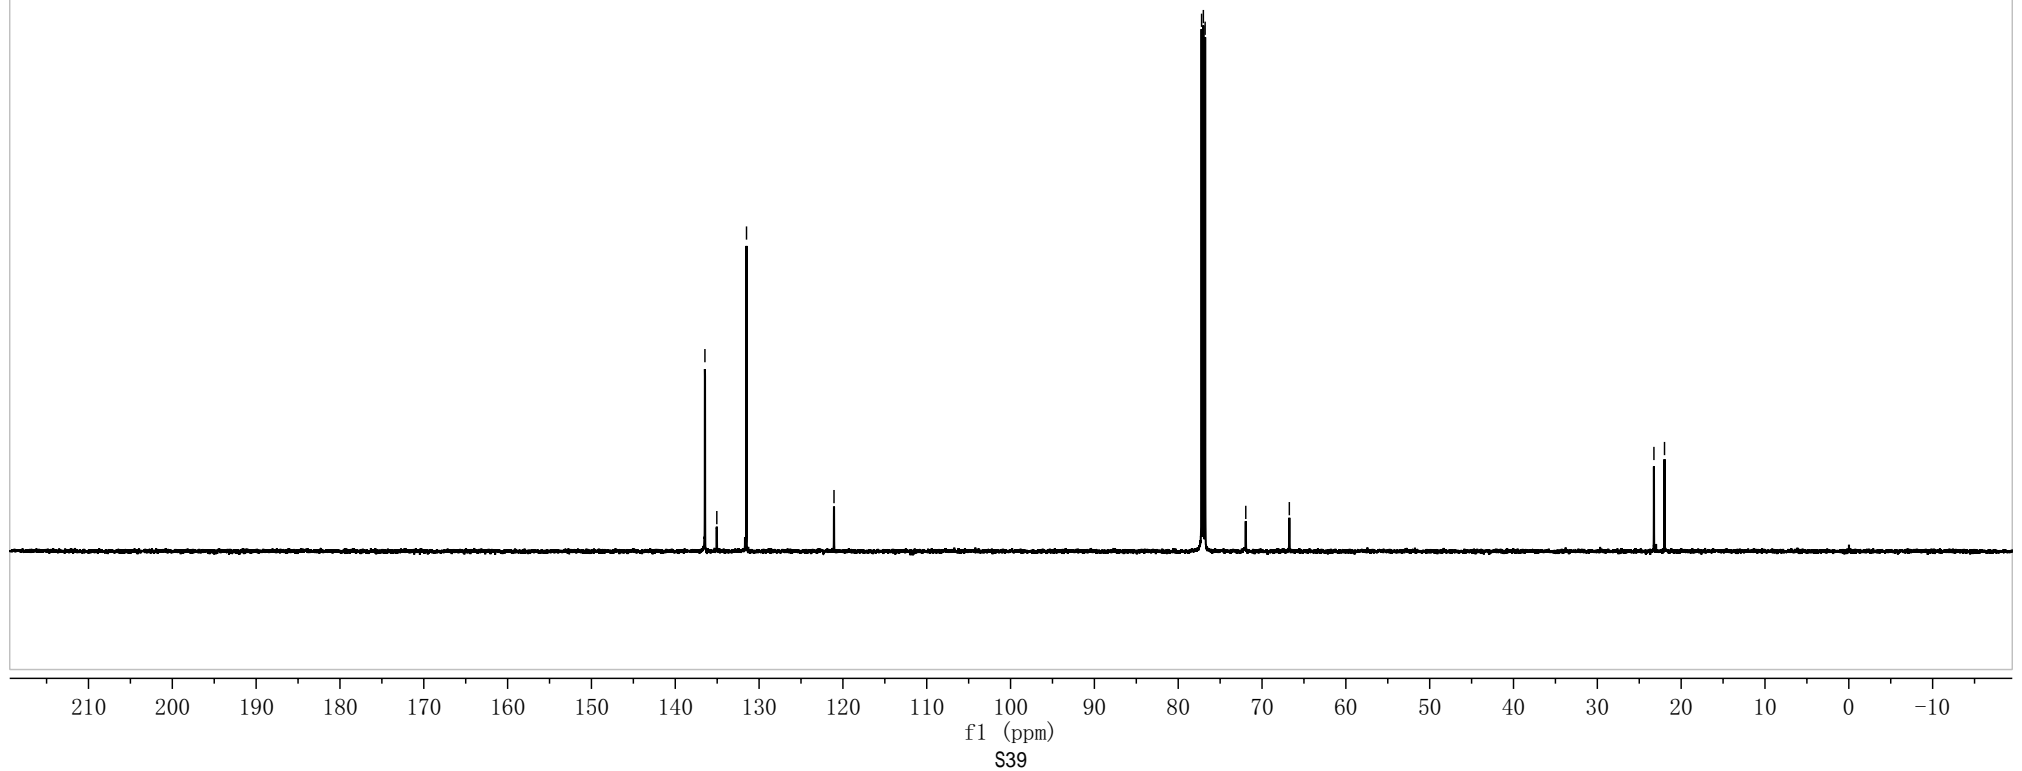

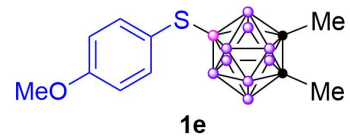

<sup>1</sup>H NMR (600 MHz, CDCl<sub>3</sub>)

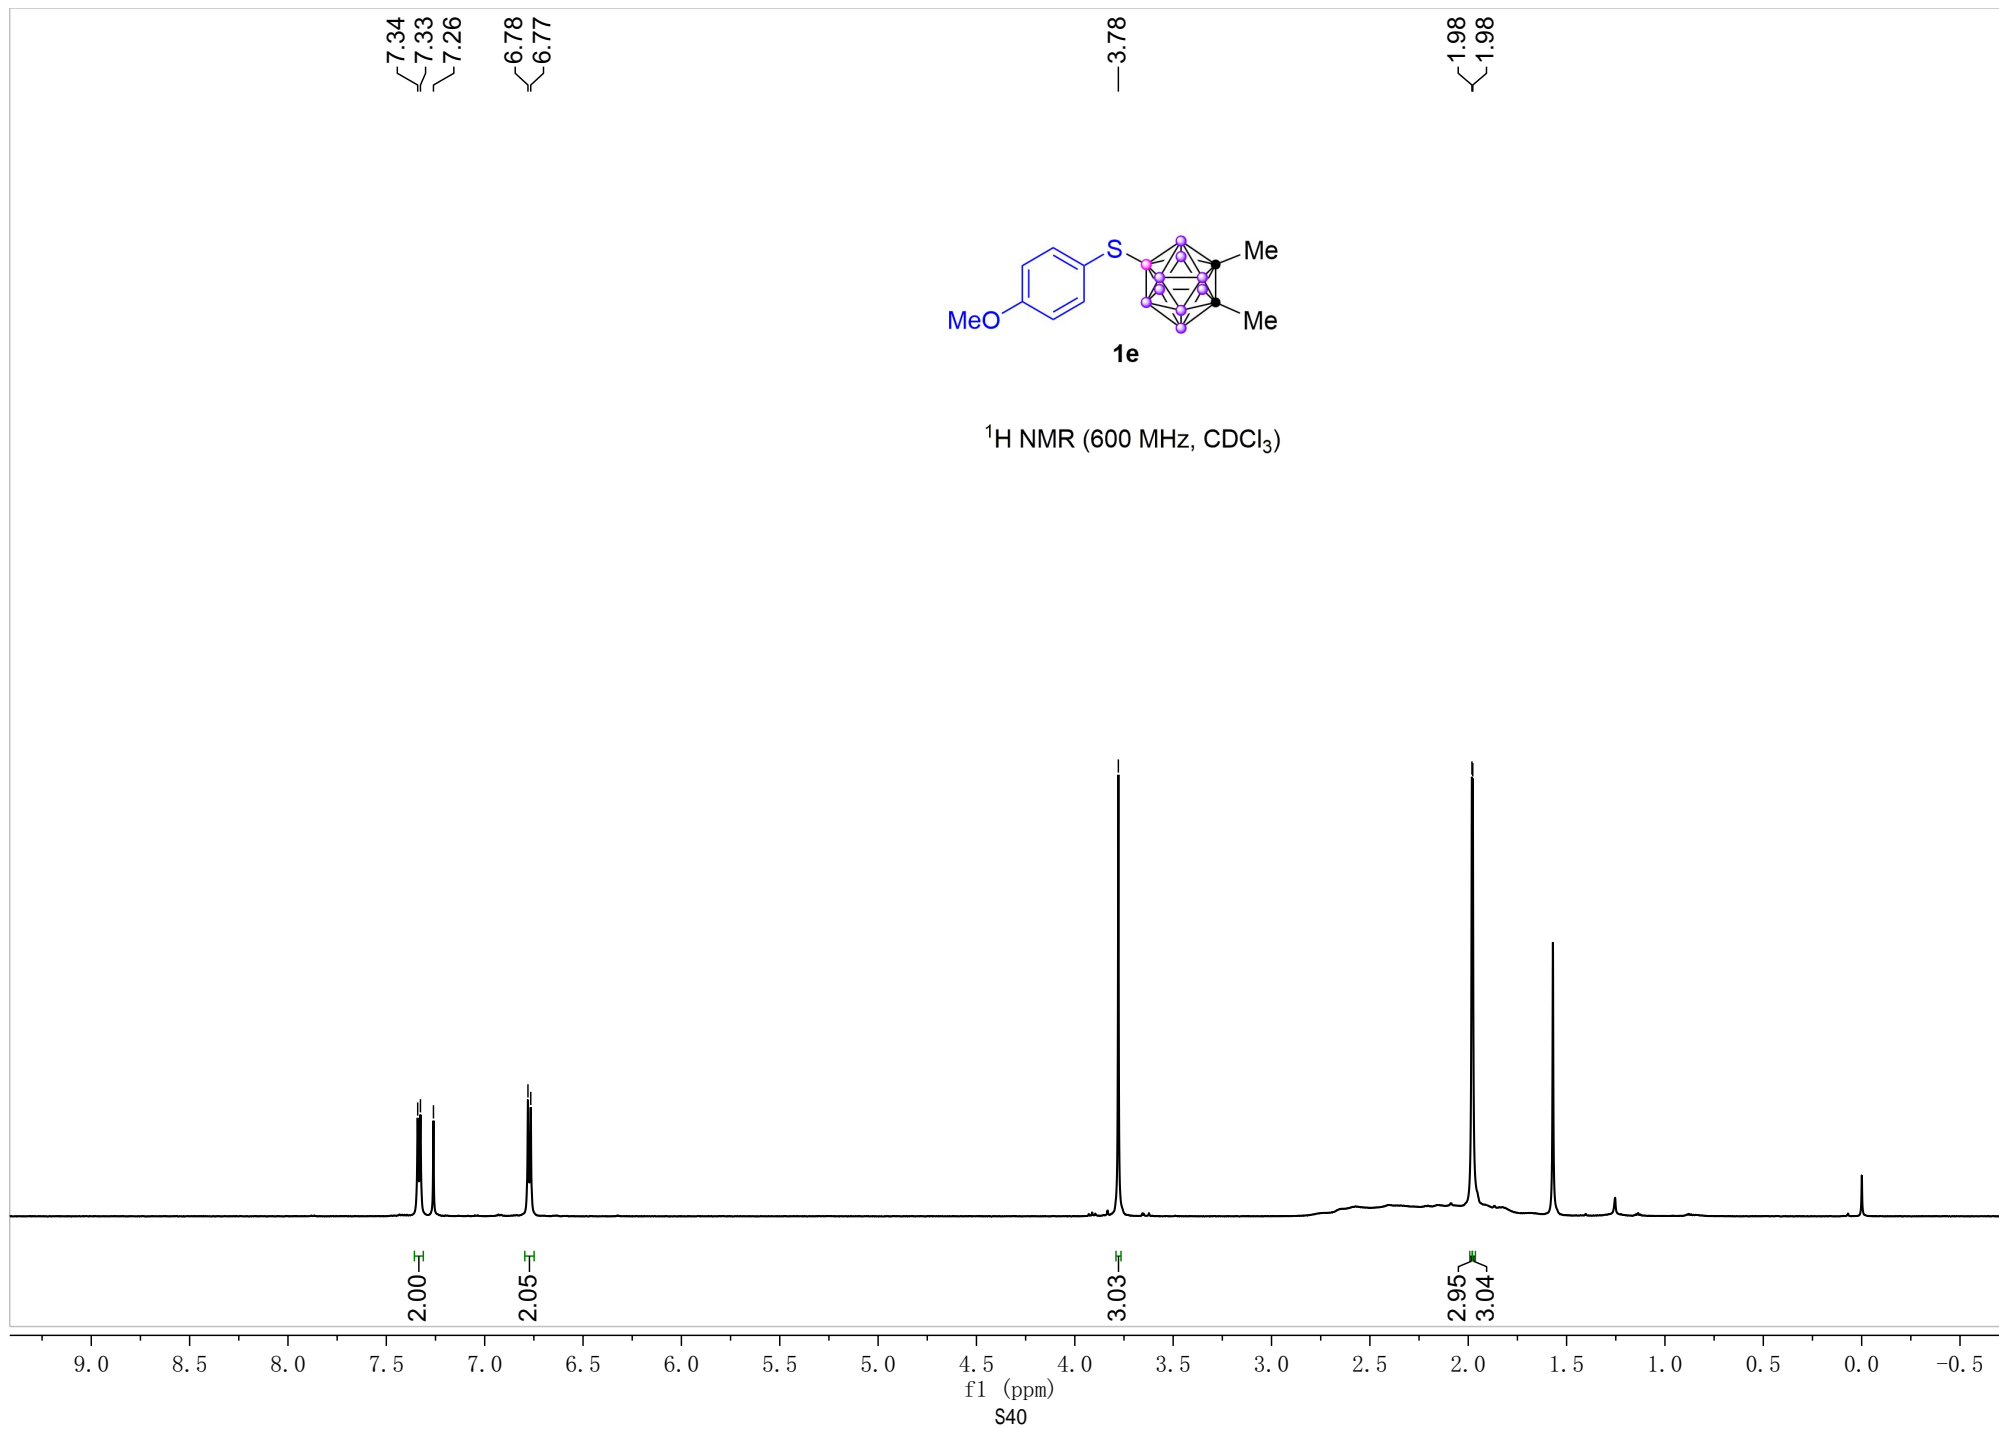



$^1\text{H}\{^{11}\text{B}\}$  NMR (600 MHz,  $\text{CDCl}_3$ )

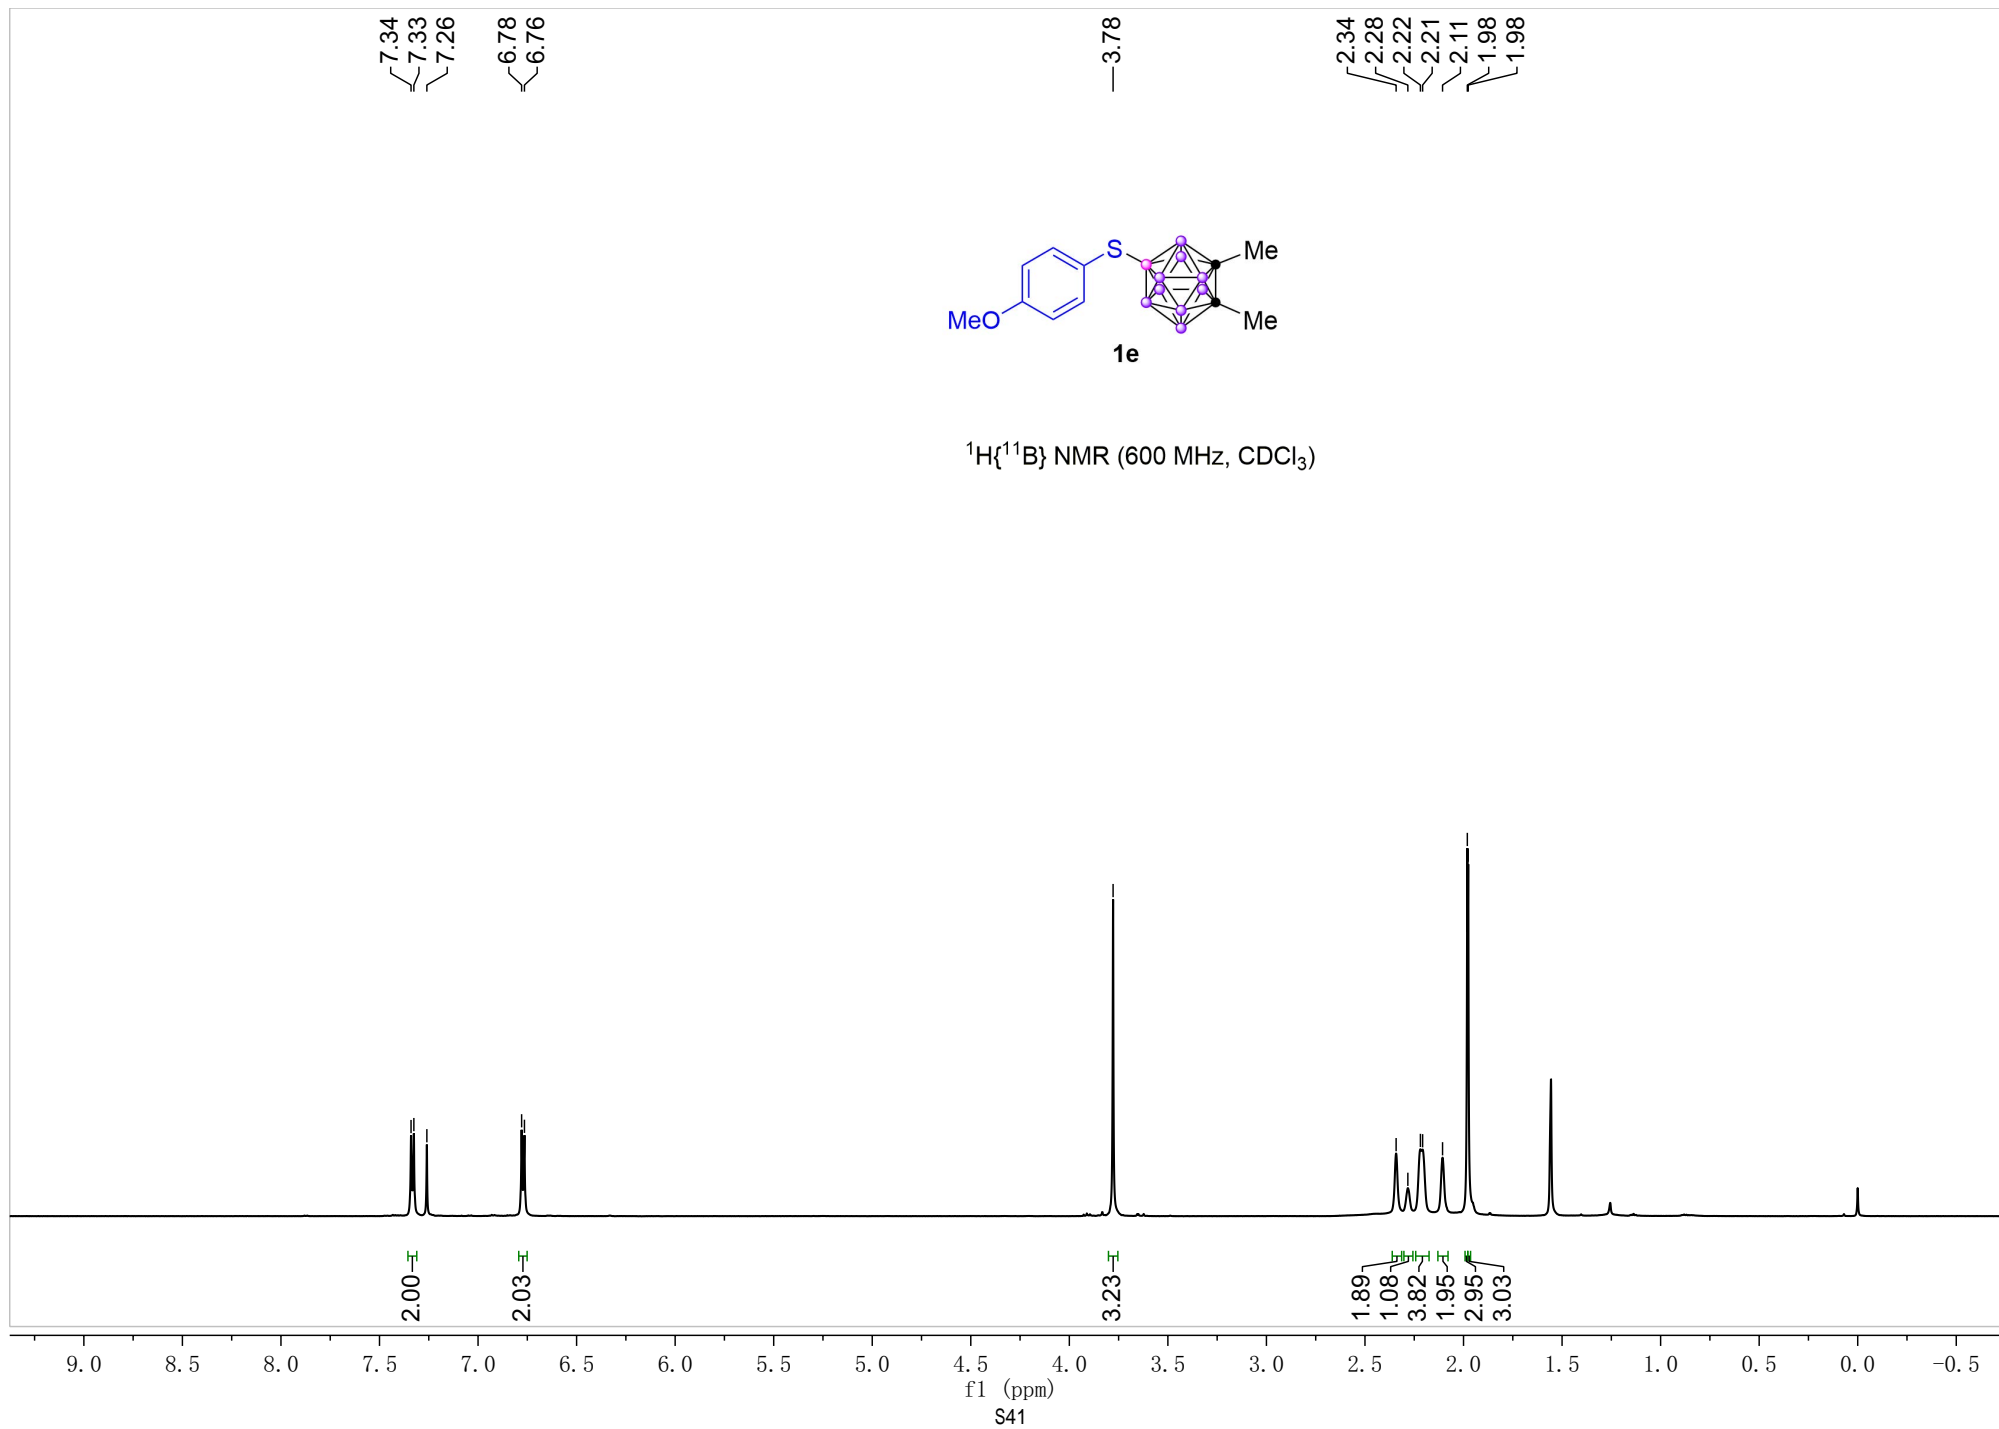

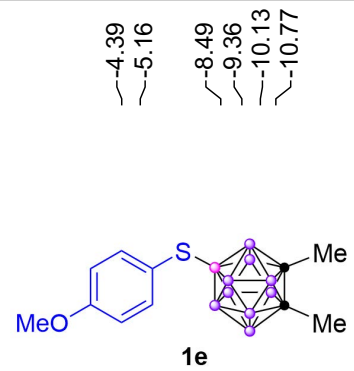

$^{11}\text{B}$  NMR (193 MHz,  $\text{CDCl}_3$ )

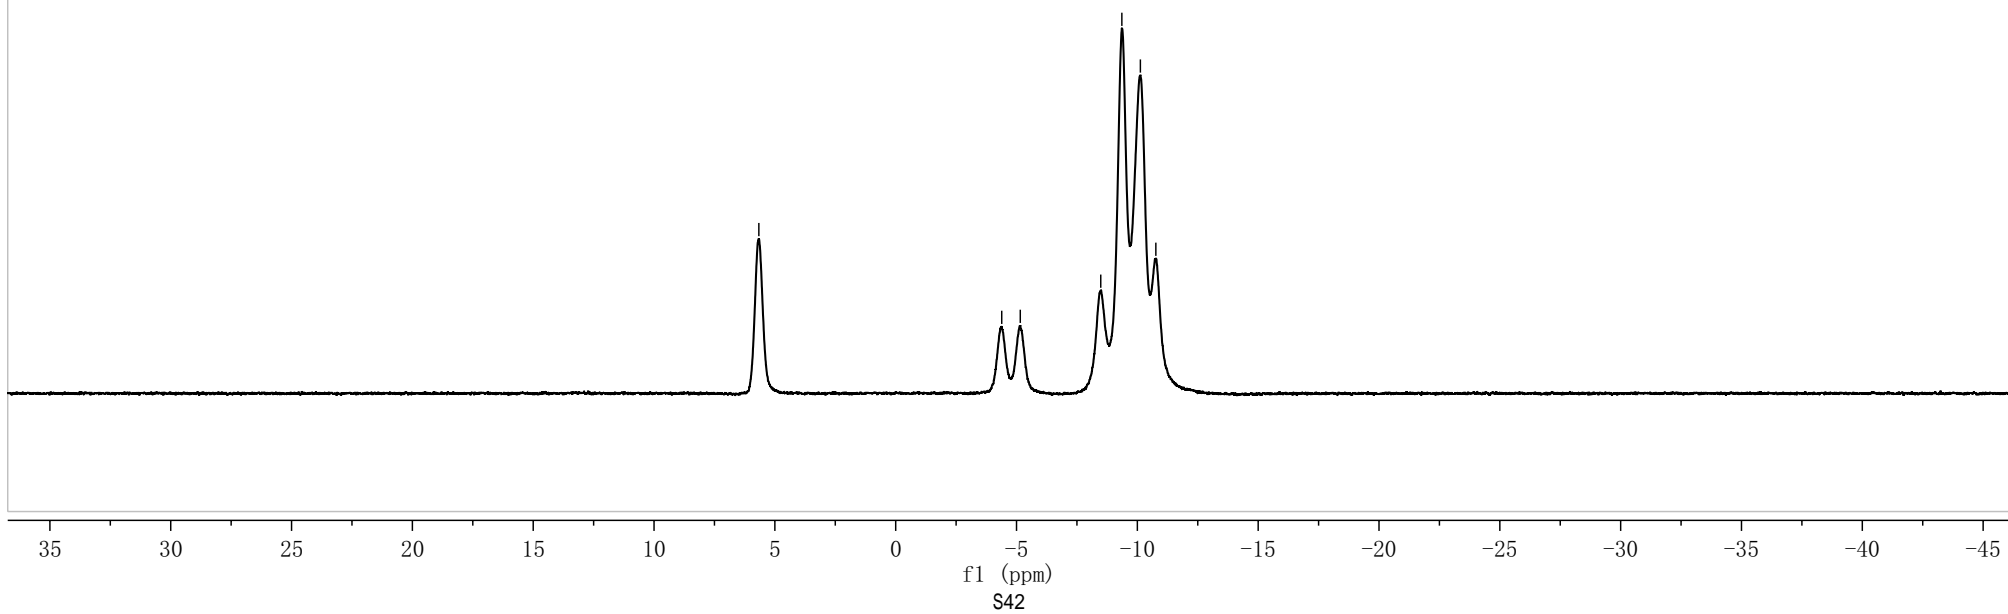

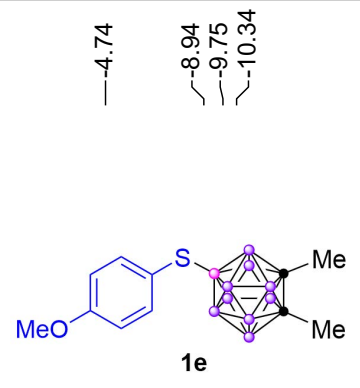

<sup>11</sup>B{<sup>1</sup>H} NMR (193 MHz, CDCl<sub>3</sub>)

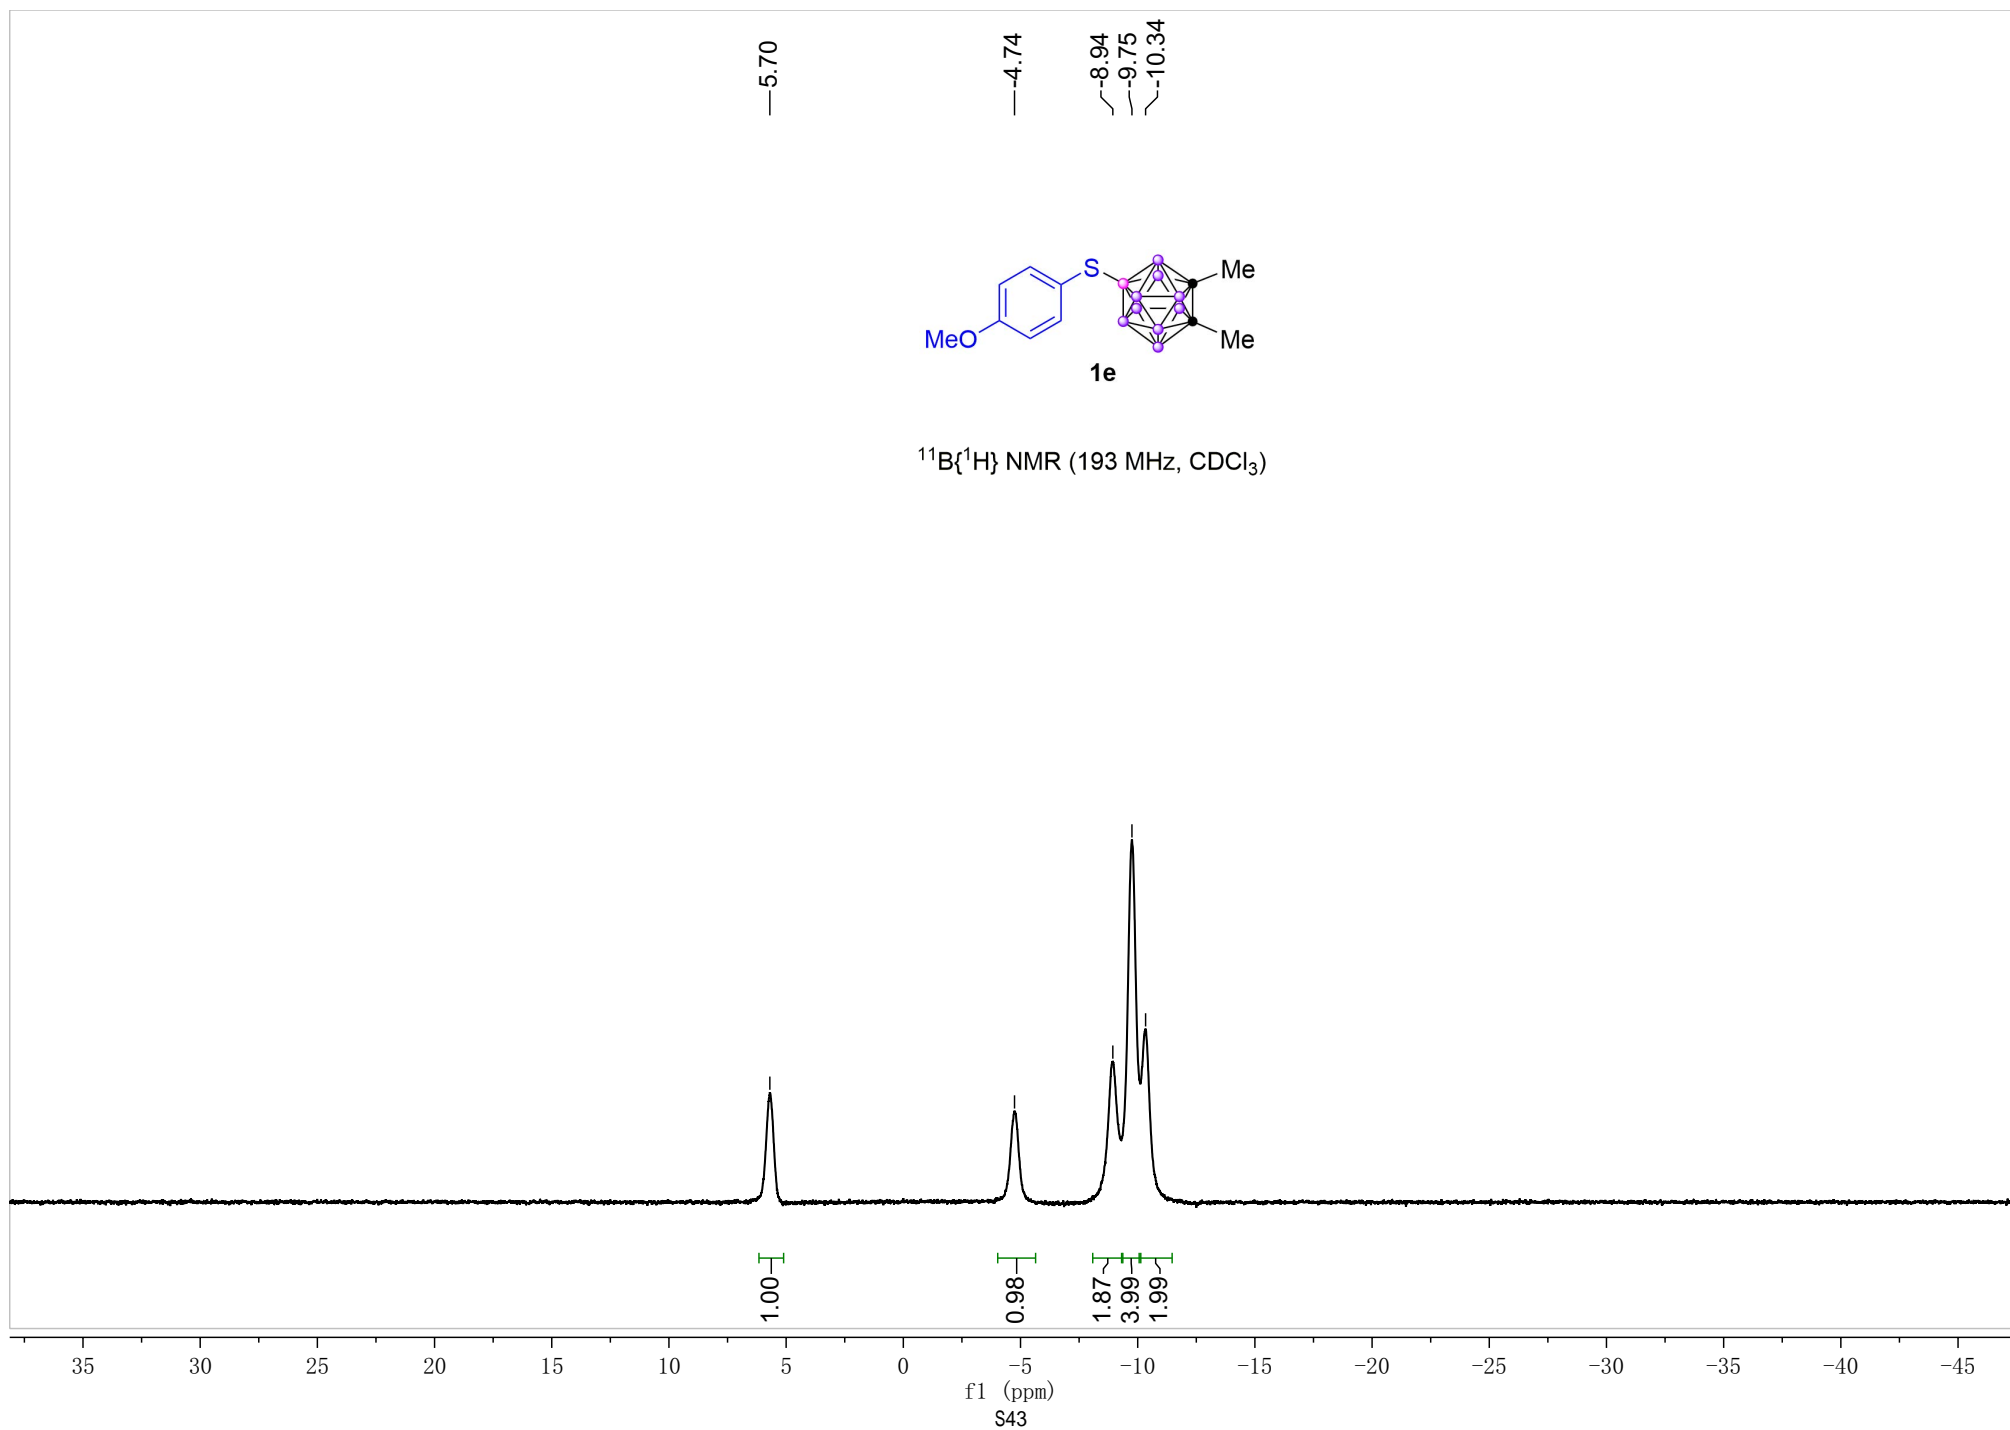

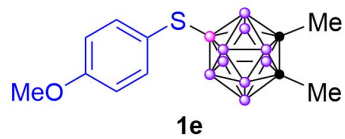

$^{13}\text{C}$  NMR (151 MHz,  $\text{CDCl}_3$ )

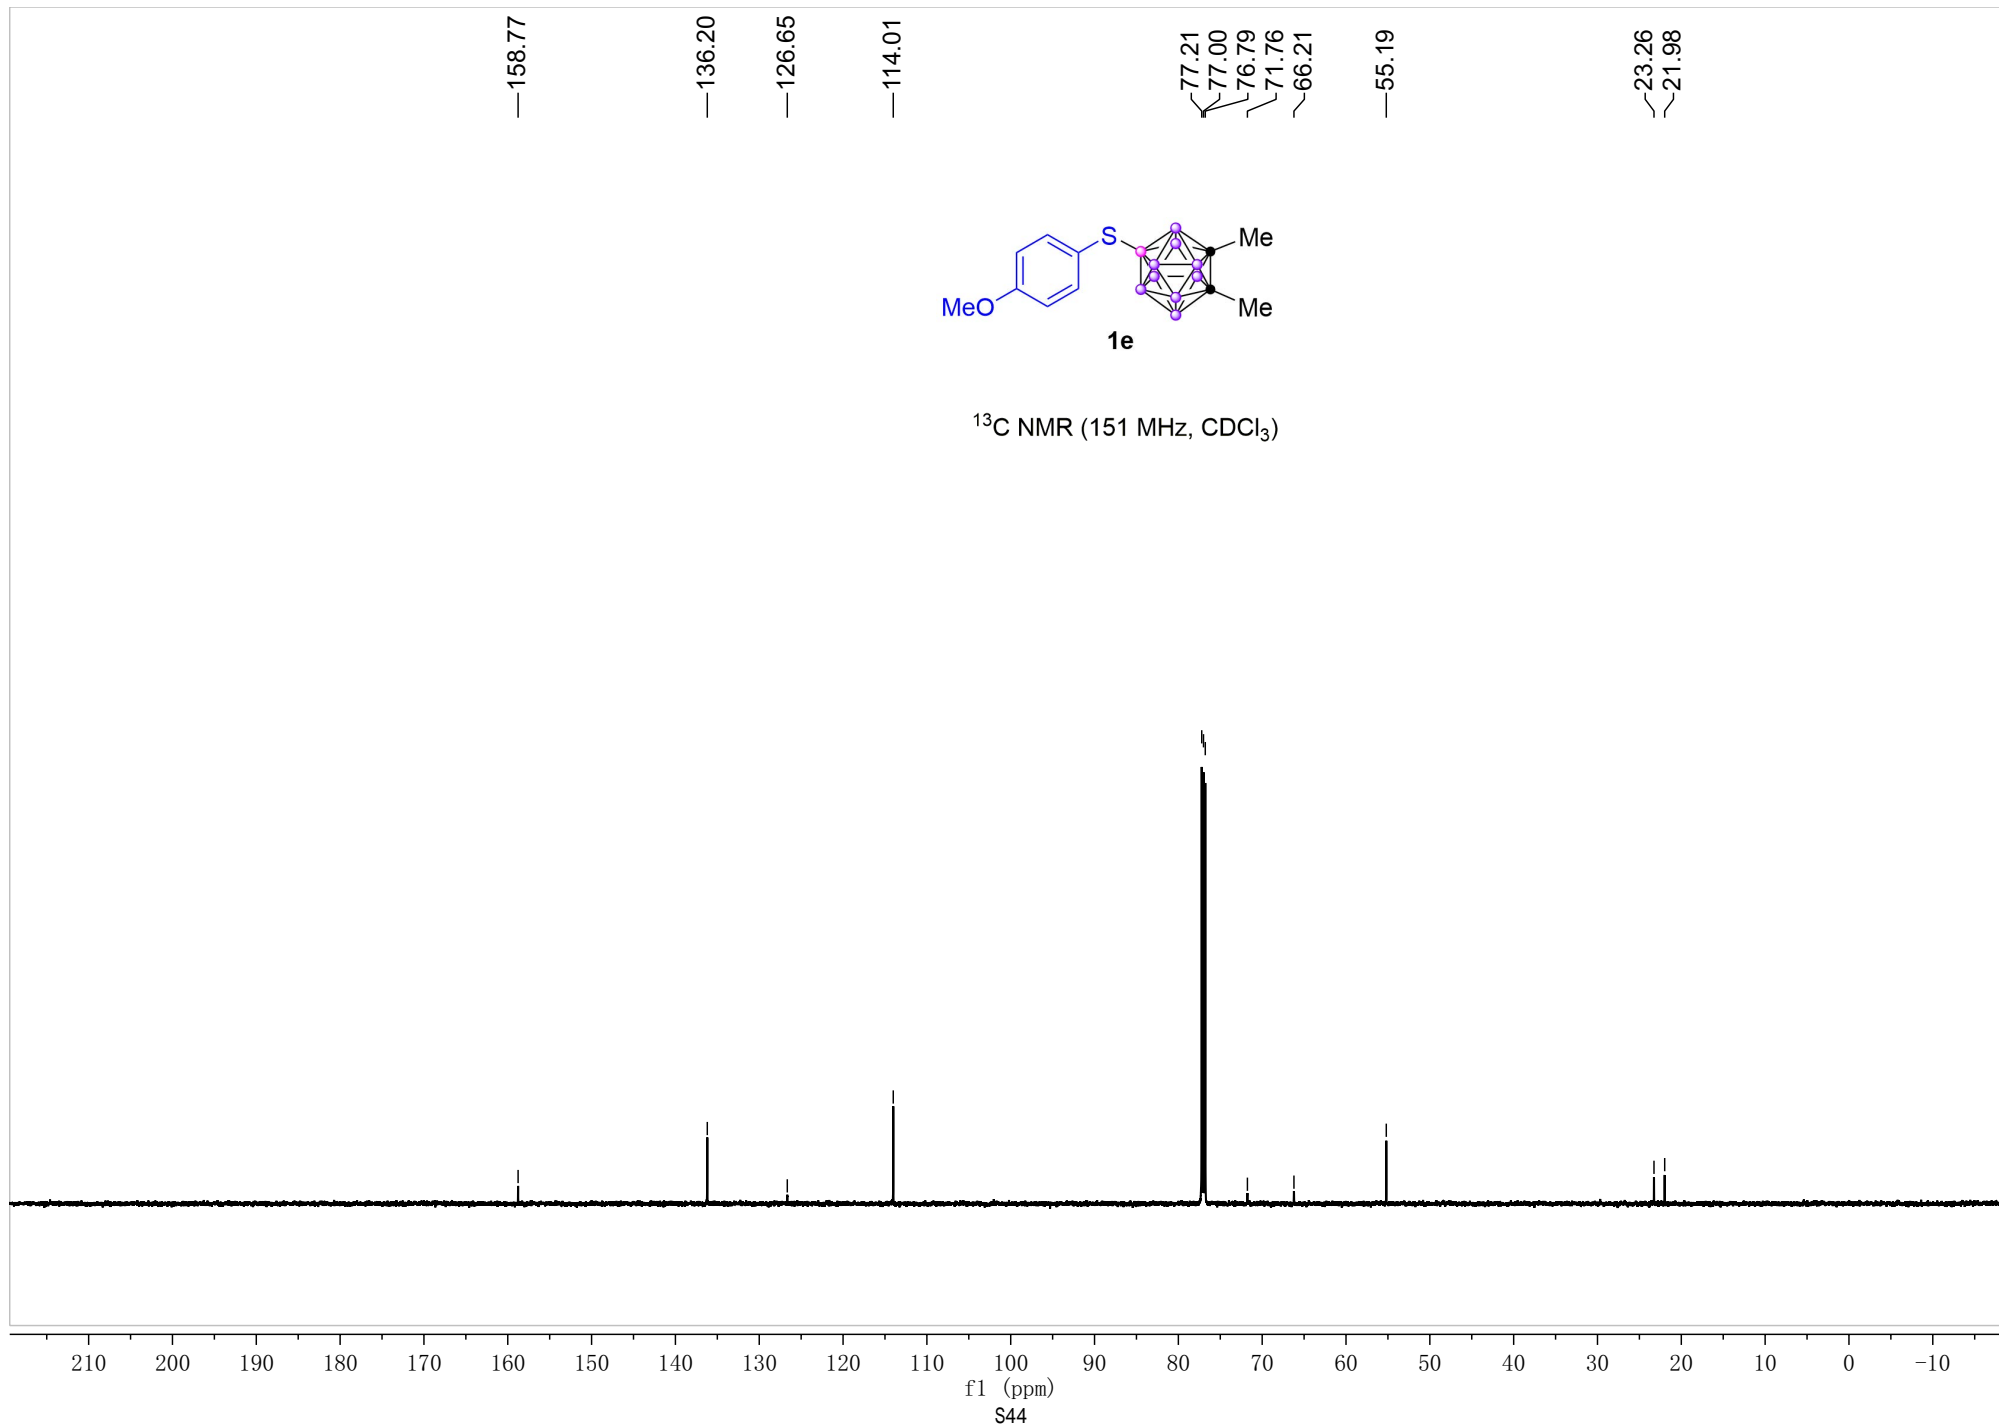

7.32  
7.31  
7.26  
7.05  
7.03

2.31  
1.98  
1.98

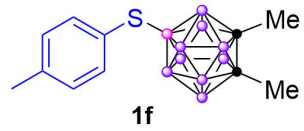

<sup>1</sup>H NMR (600 MHz, CDCl<sub>3</sub>)

2.00

1.99

3.05

3.08

3.09

9.0 8.5 8.0 7.5 7.0 6.5 6.0 5.5 5.0 4.5 4.0 3.5 3.0 2.5 2.0 1.5 1.0 0.5 0.0 -0.5

f1 (ppm)

S45

7.32  
7.30  
7.26  
7.04  
7.03

2.36  
2.31  
2.22  
2.11  
1.98  
1.98

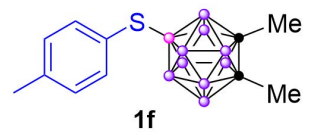

$^1\text{H}\{^{11}\text{B}\}$  NMR (600 MHz,  $\text{CDCl}_3$ )

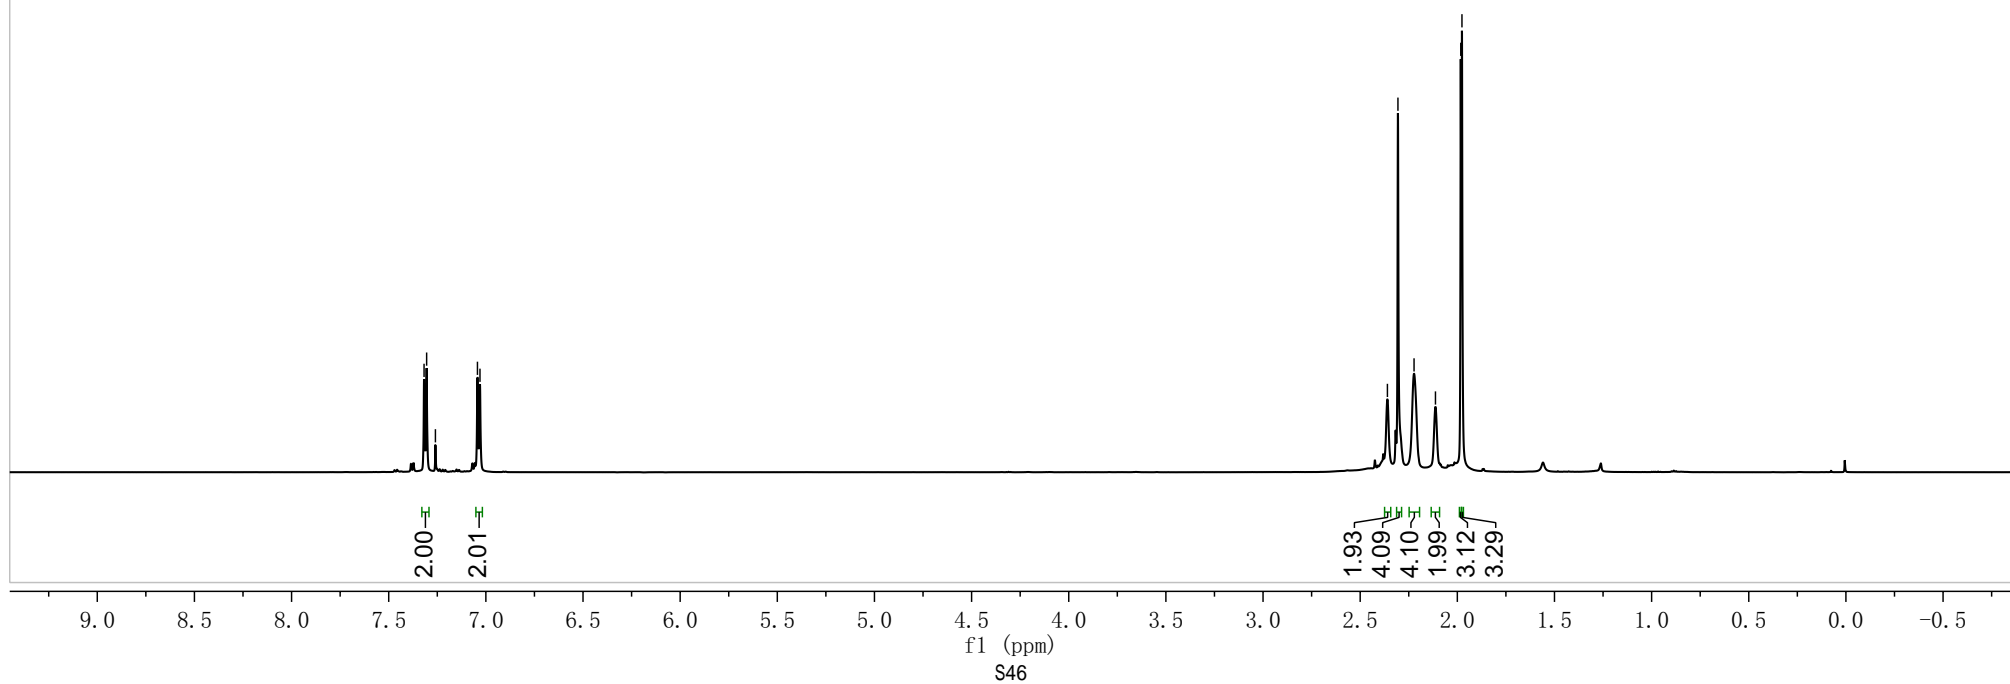



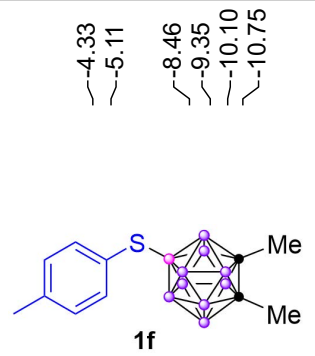

$^{11}\text{B}$  NMR (193 MHz,  $\text{CDCl}_3$ )

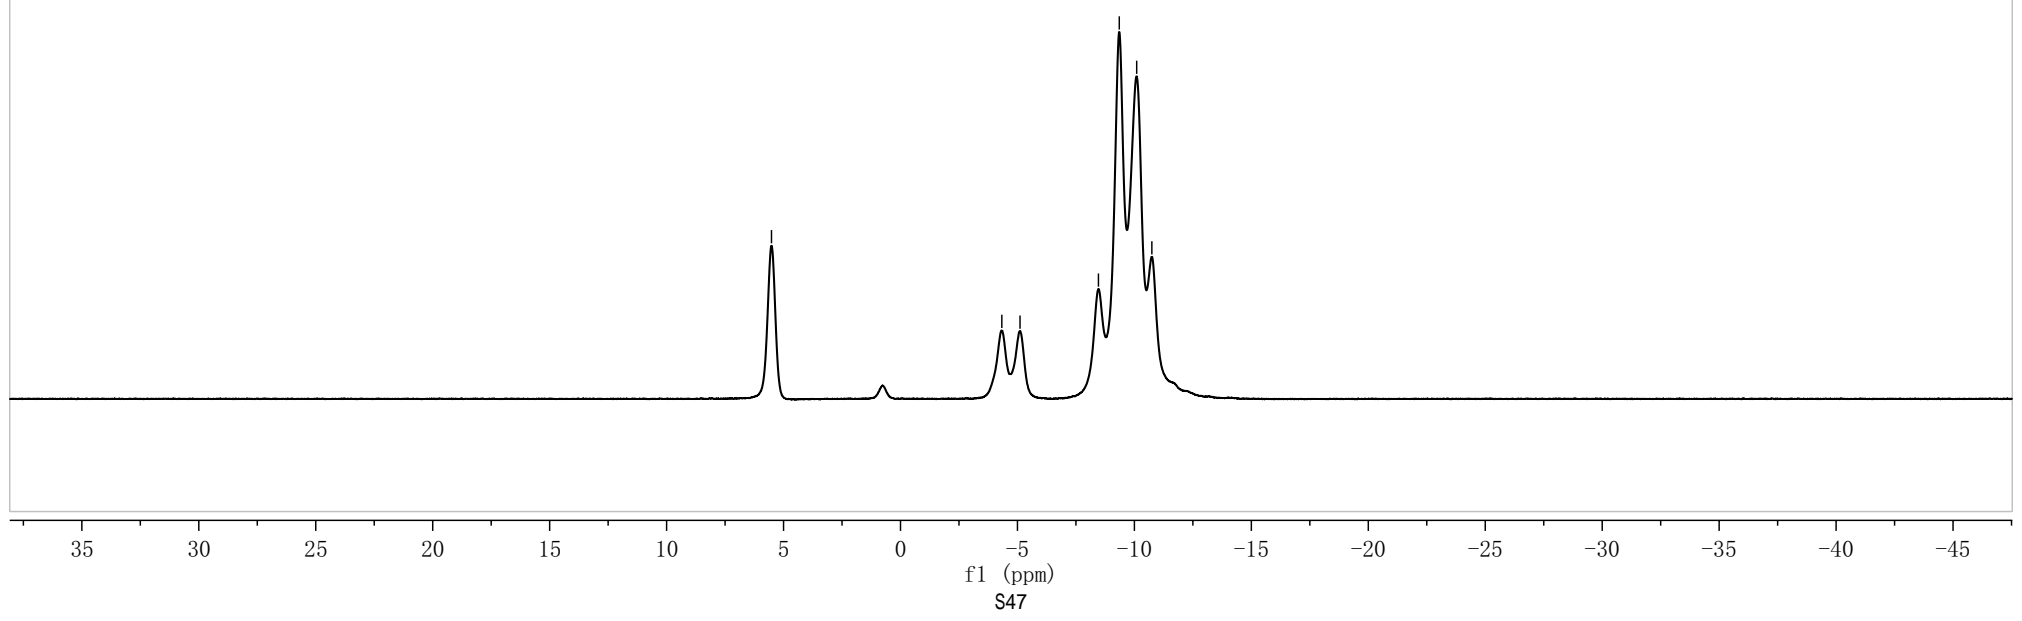

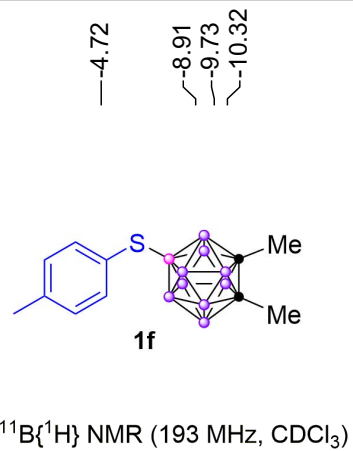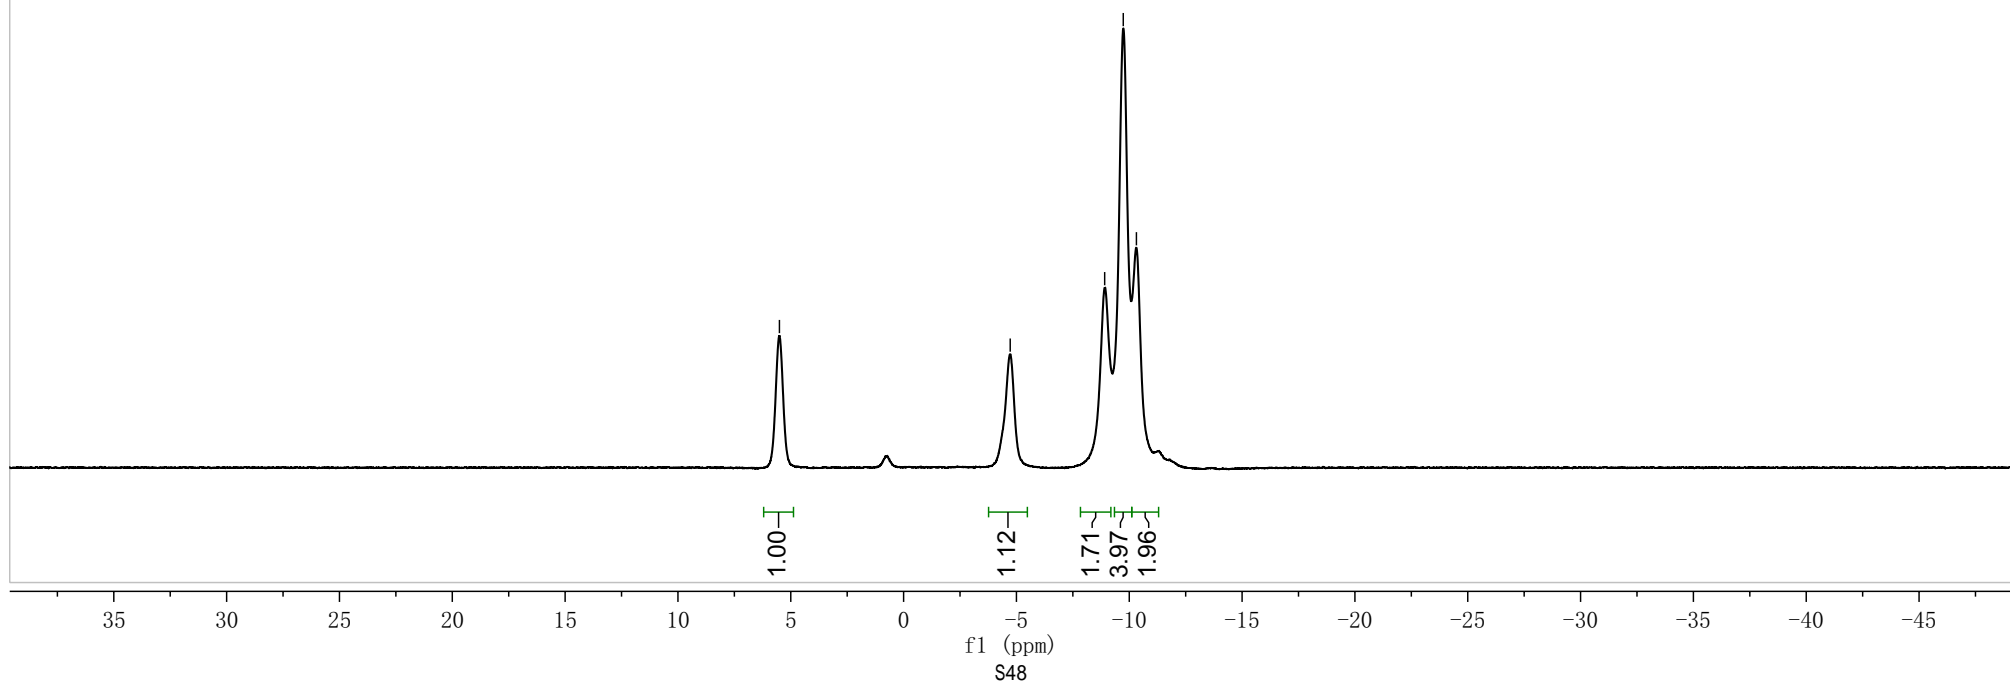

136.54  
134.78  
132.19  
129.24

77.21  
77.00  
76.79  
71.78  
66.28

23.24  
21.97  
21.07

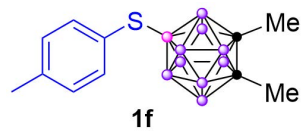

$^{13}\text{C}$  NMR (151 MHz,  $\text{CDCl}_3$ )

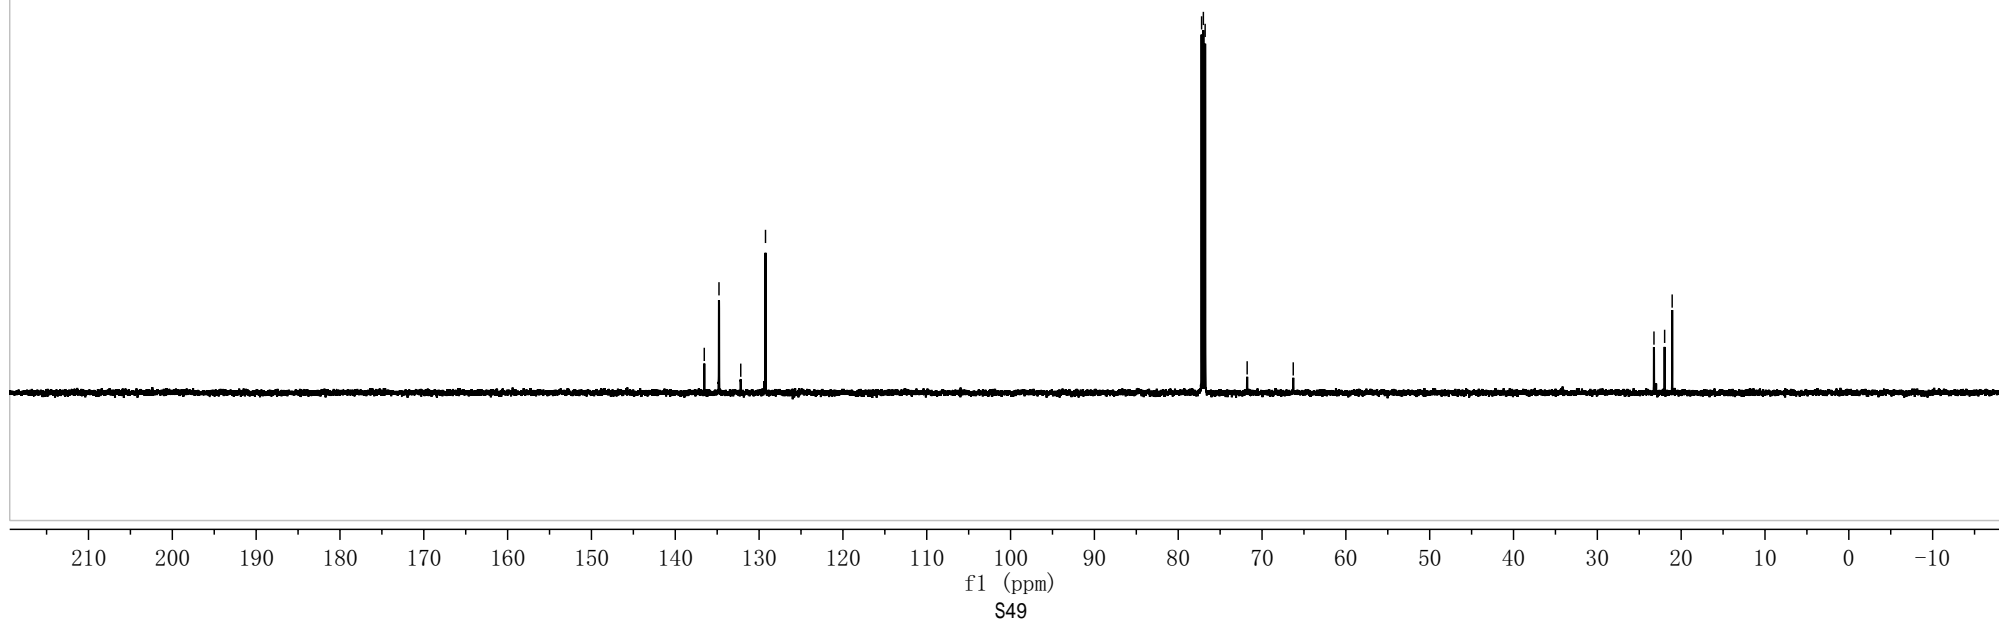

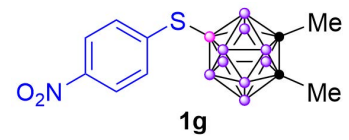

$^1\text{H}$  NMR (600 MHz,  $\text{CDCl}_3$ )

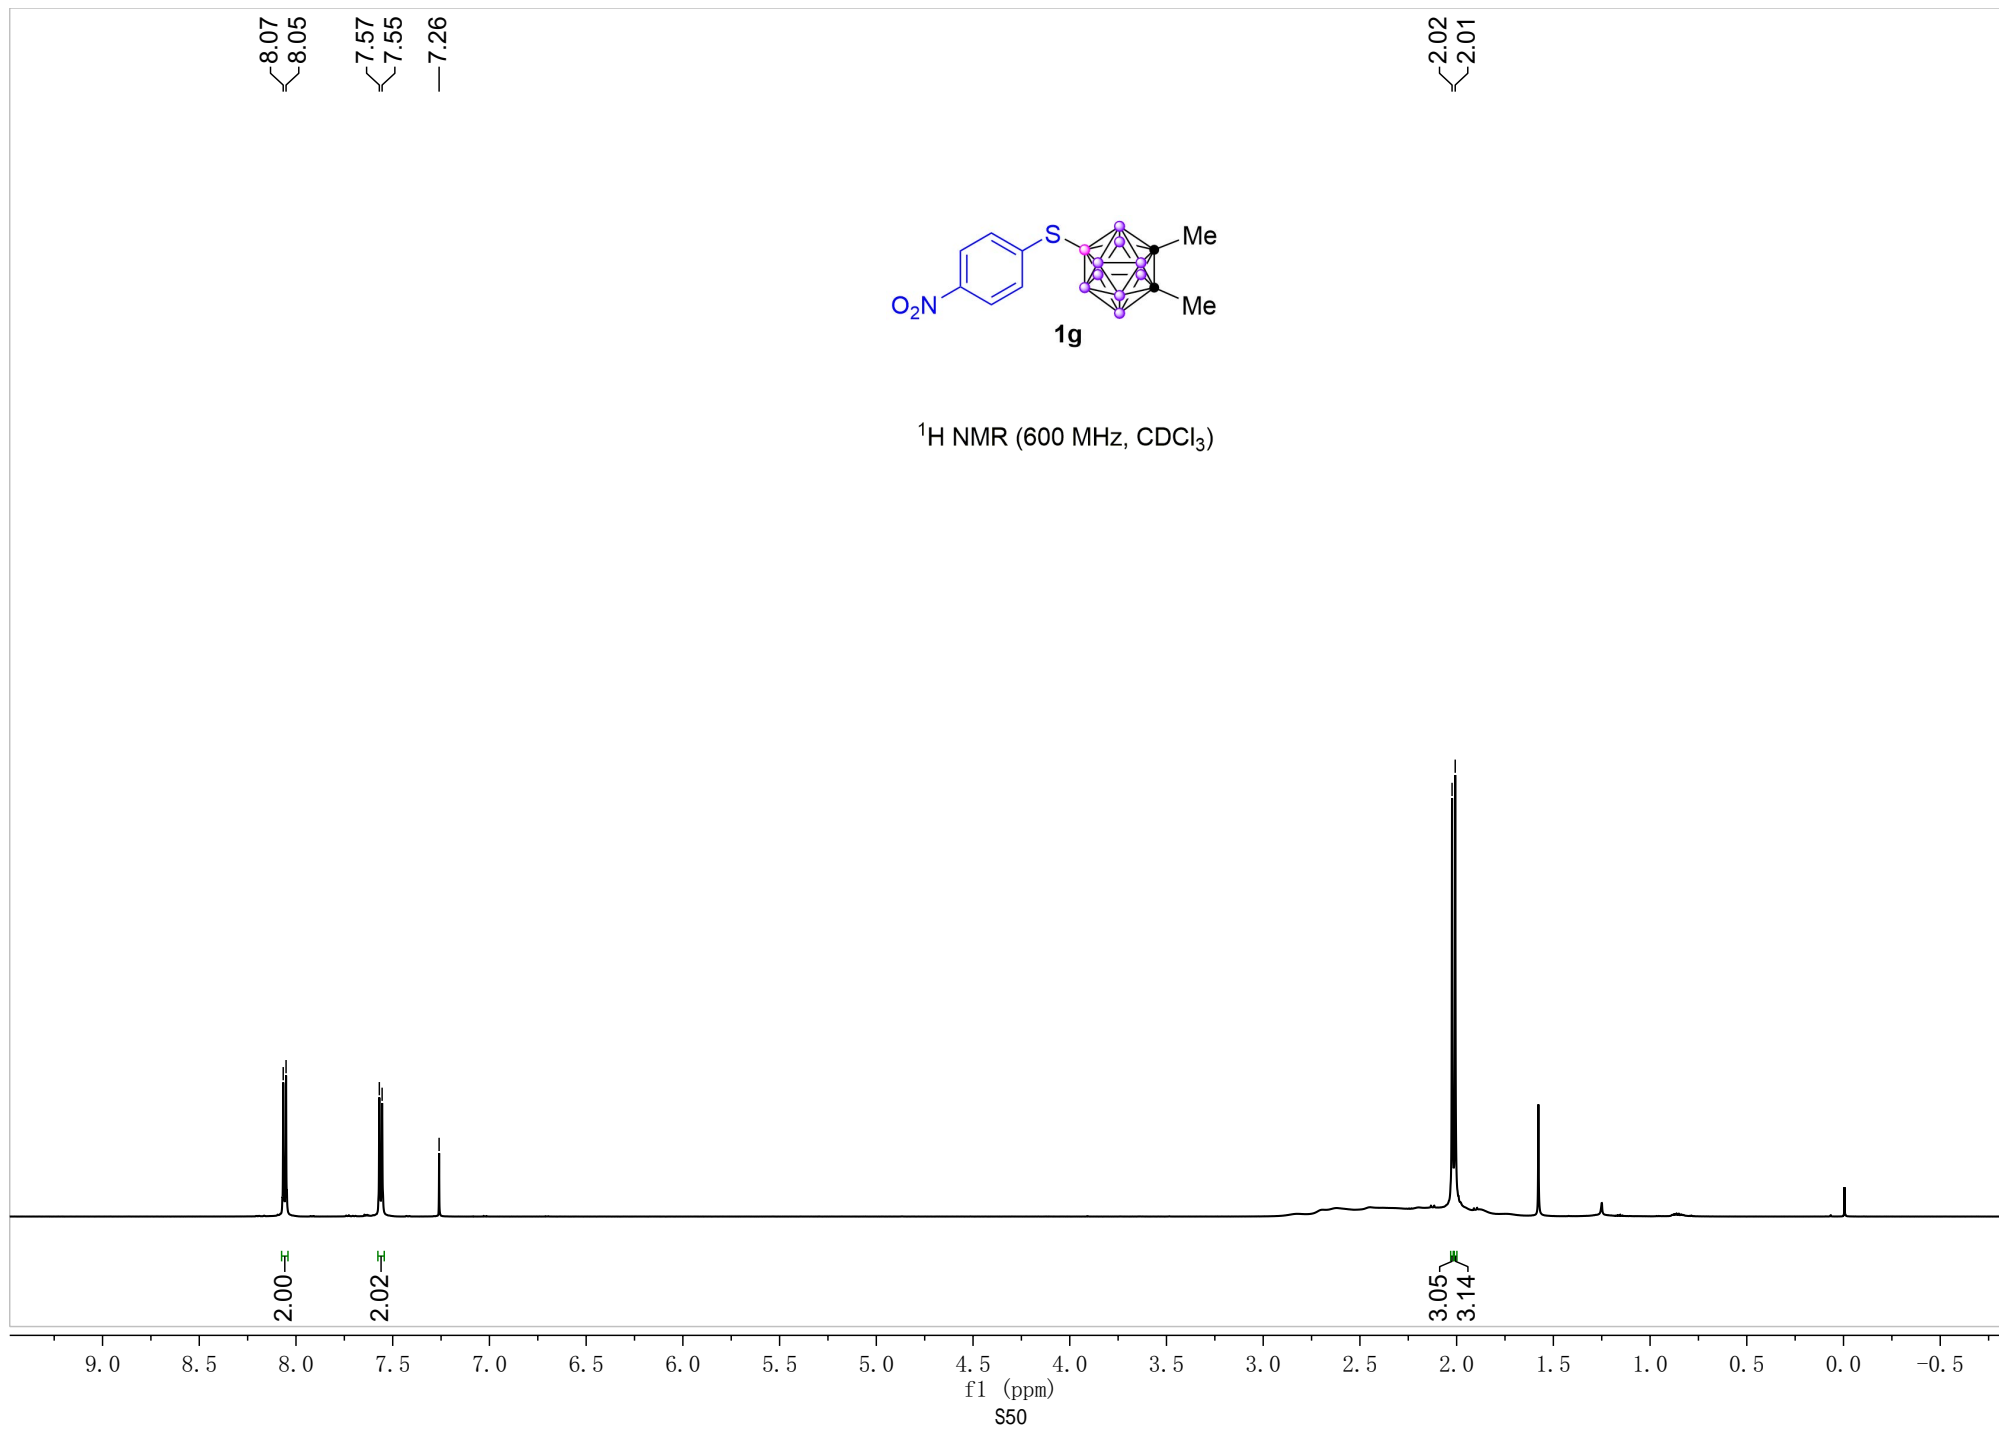



$^1\text{H}\{^{11}\text{B}\}$  NMR (600 MHz,  $\text{CDCl}_3$ )

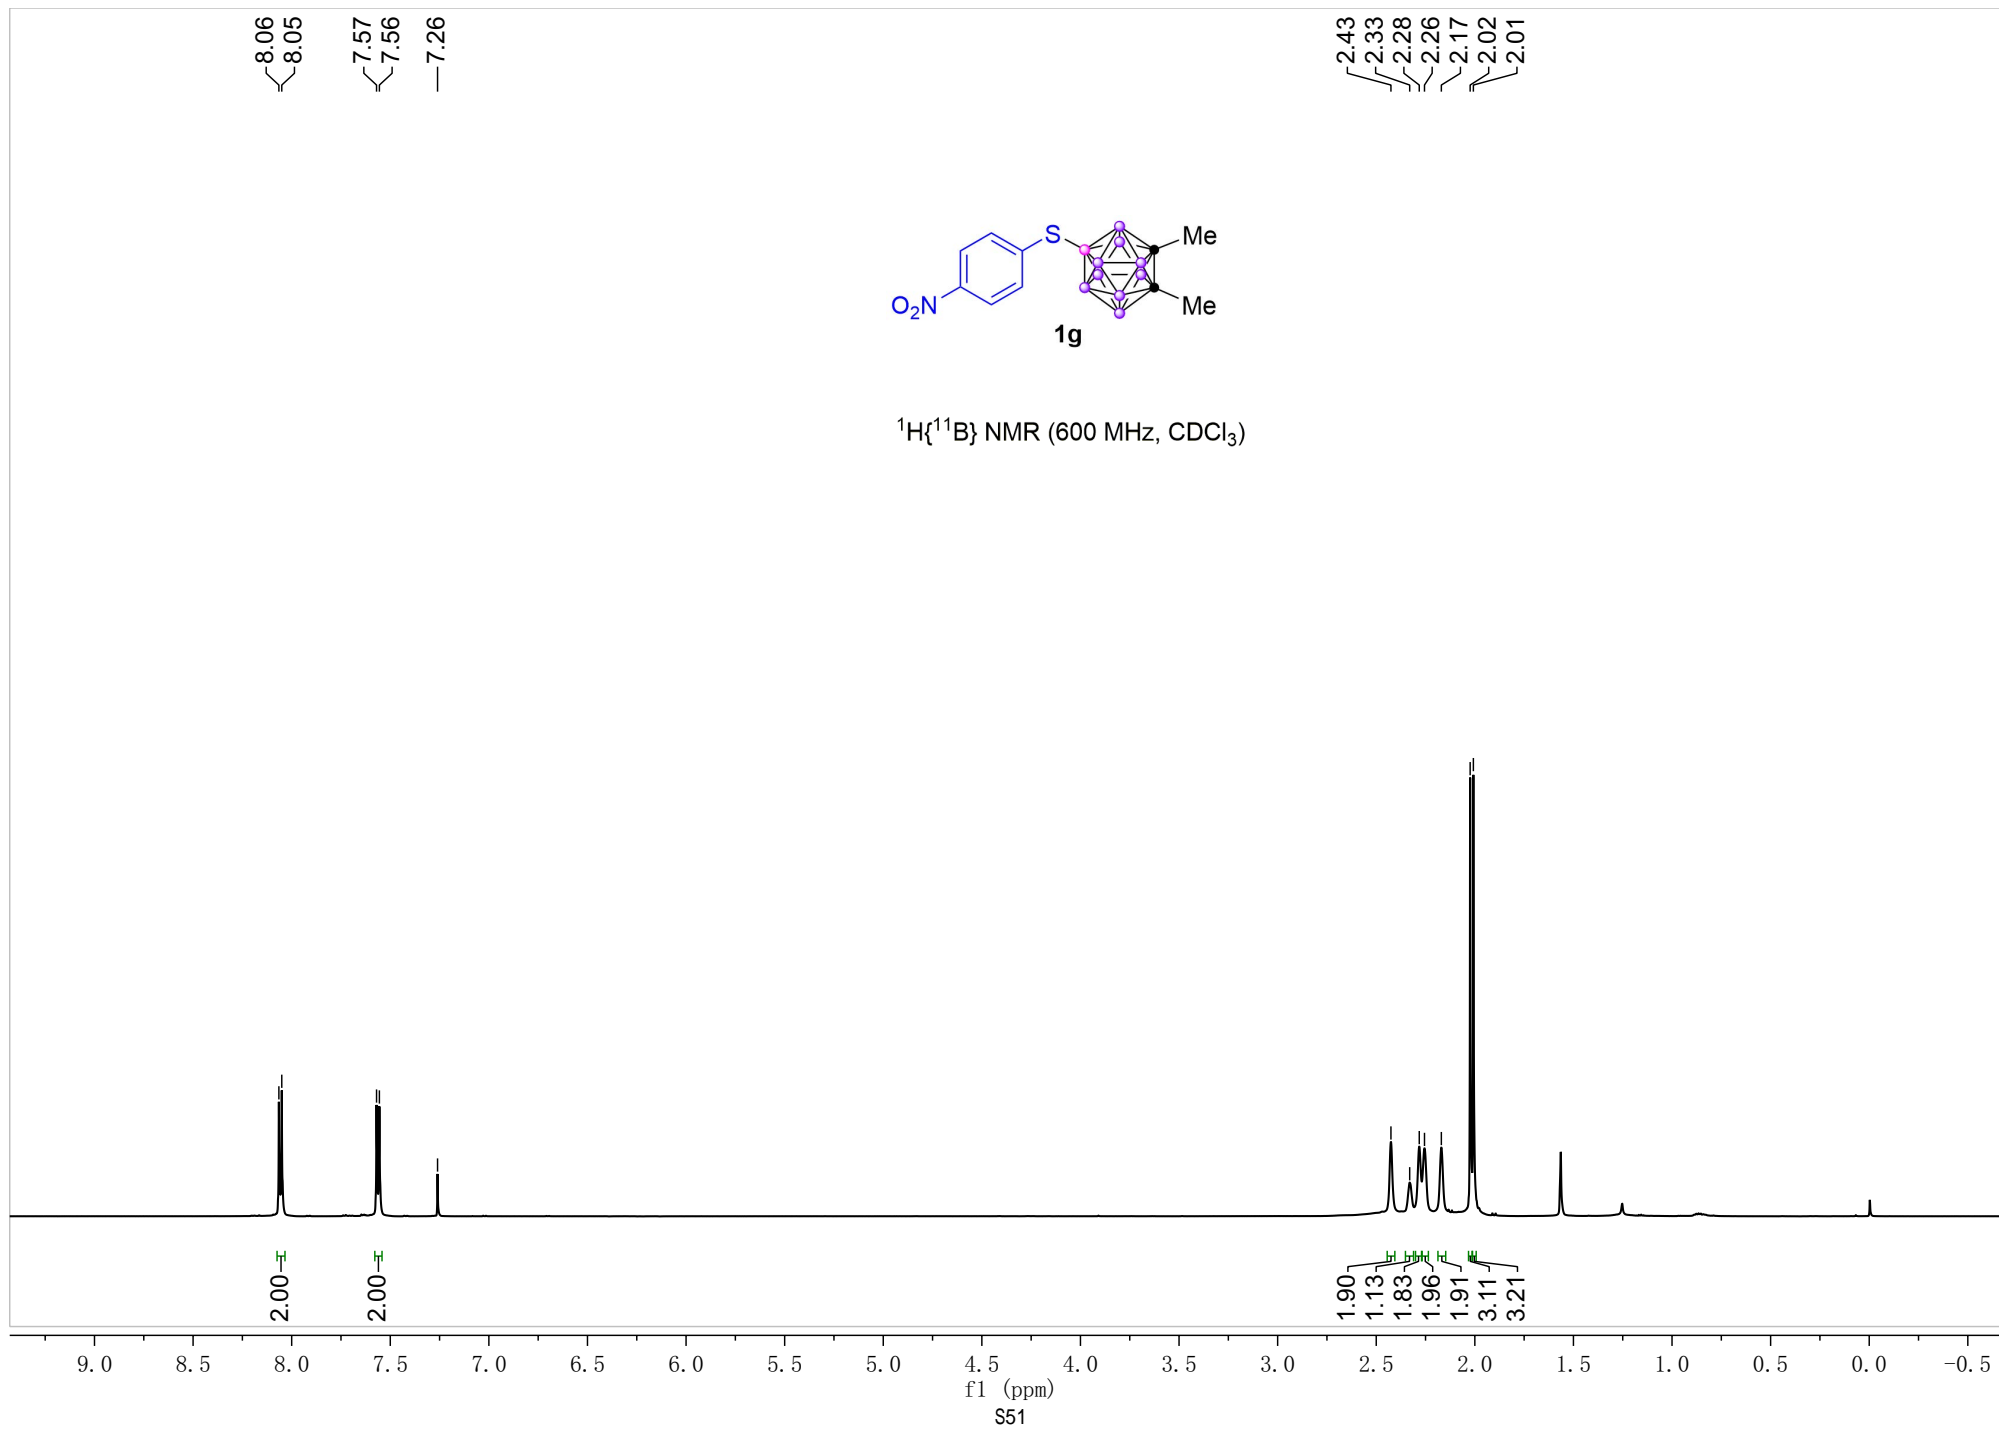

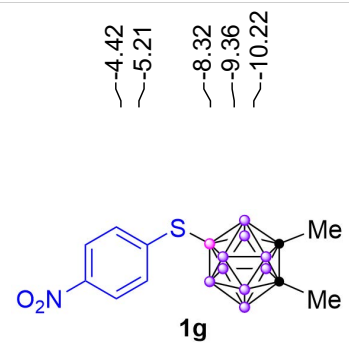

$^{11}\text{B}$  NMR (193 MHz,  $\text{CDCl}_3$ )

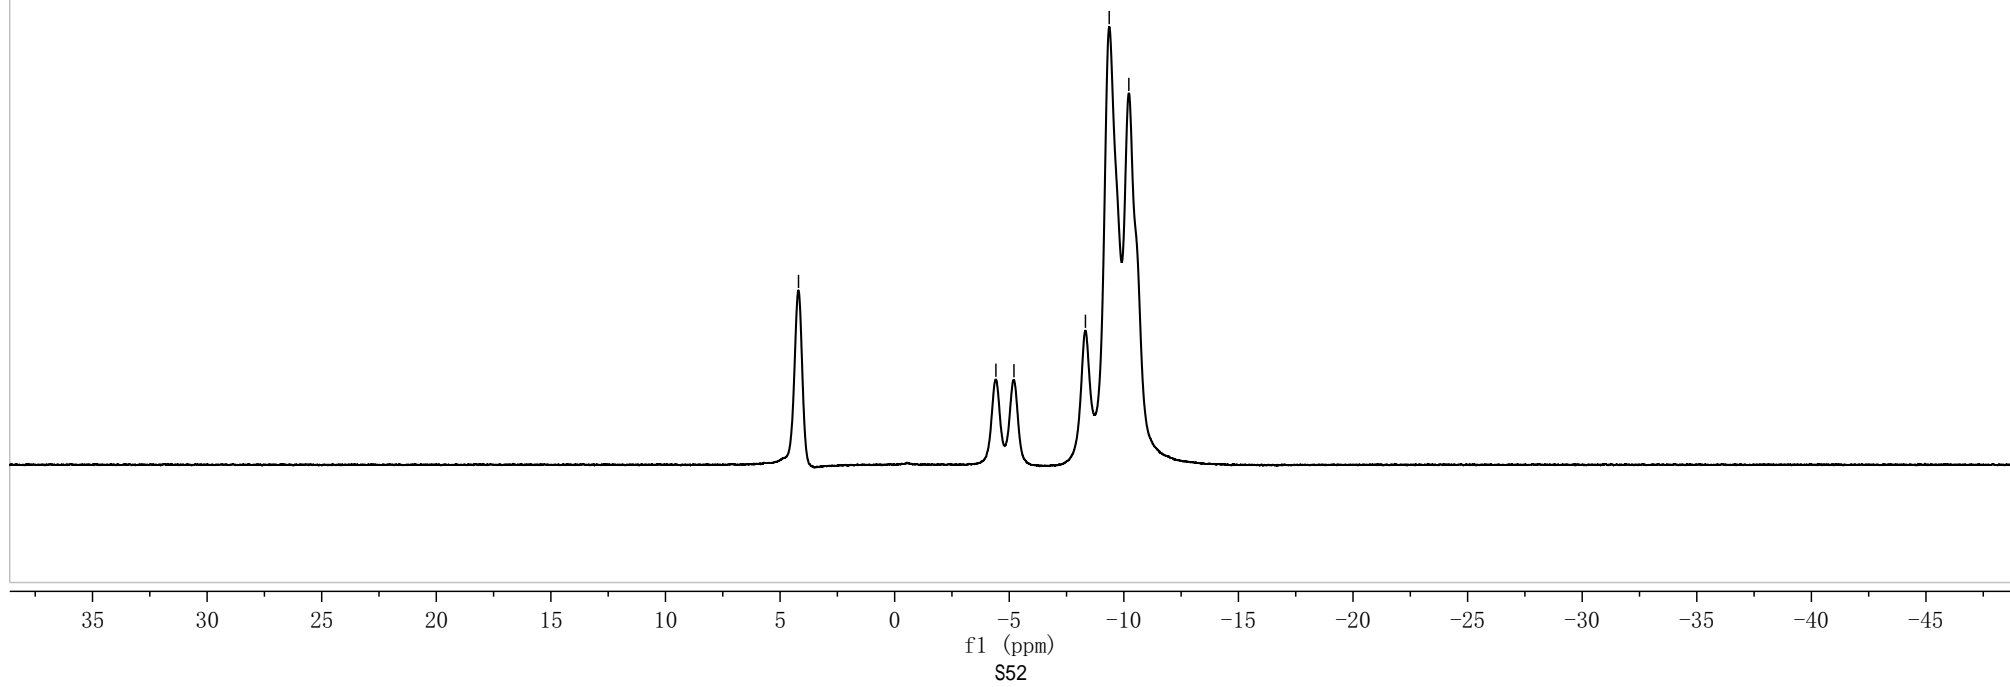



$^{11}\text{B}\{^1\text{H}\}$  NMR (193 MHz,  $\text{CDCl}_3$ )

—4.19  
—4.80  
—8.79  
—9.83

1.00  
0.98  
1.64  
5.91

f1 (ppm)  
S53

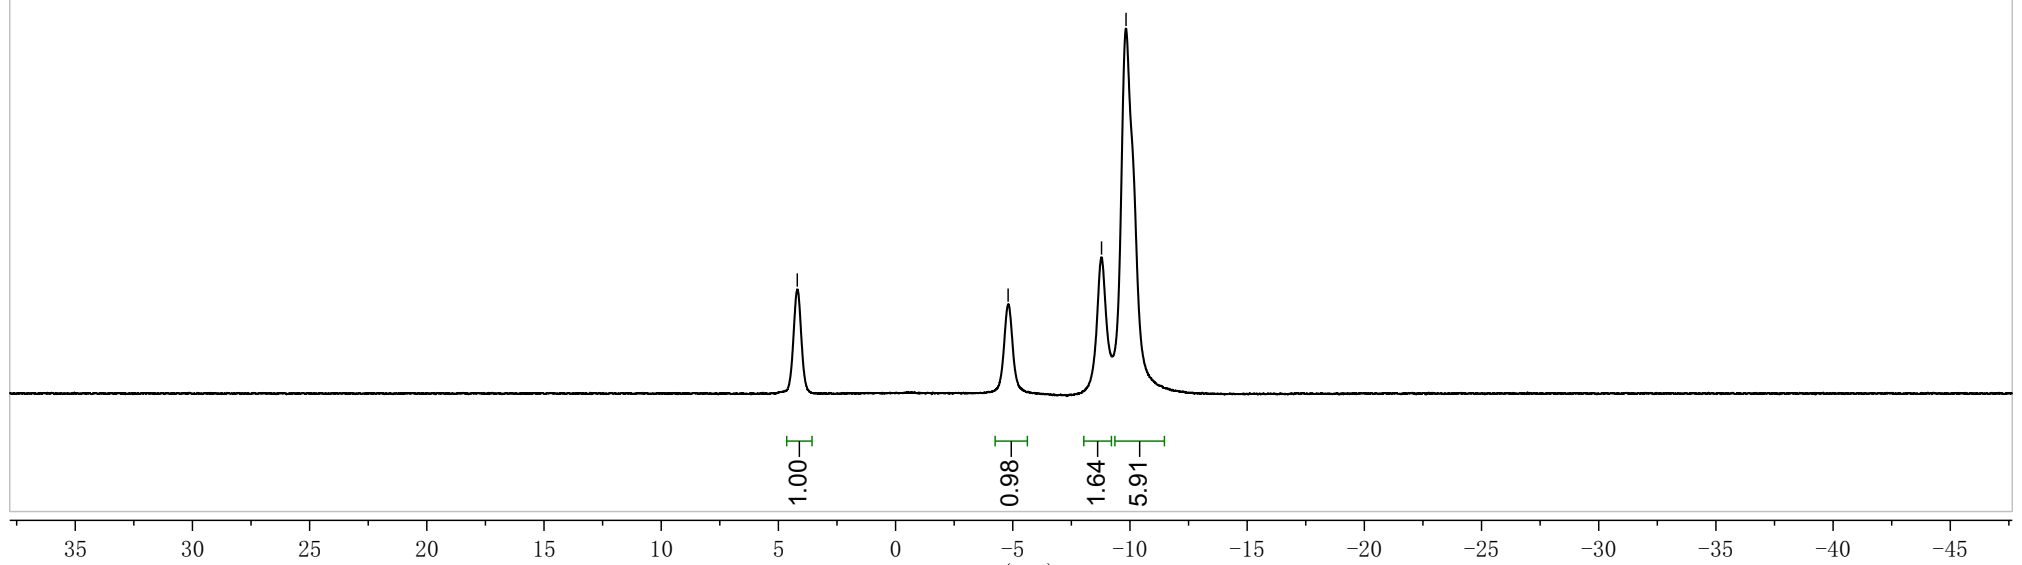



<sup>13</sup>C NMR (151 MHz, CDCl<sub>3</sub>)

146.39  
145.84  
134.31  
123.32  
77.21  
77.00  
76.79  
72.21  
67.71  
23.26  
22.03

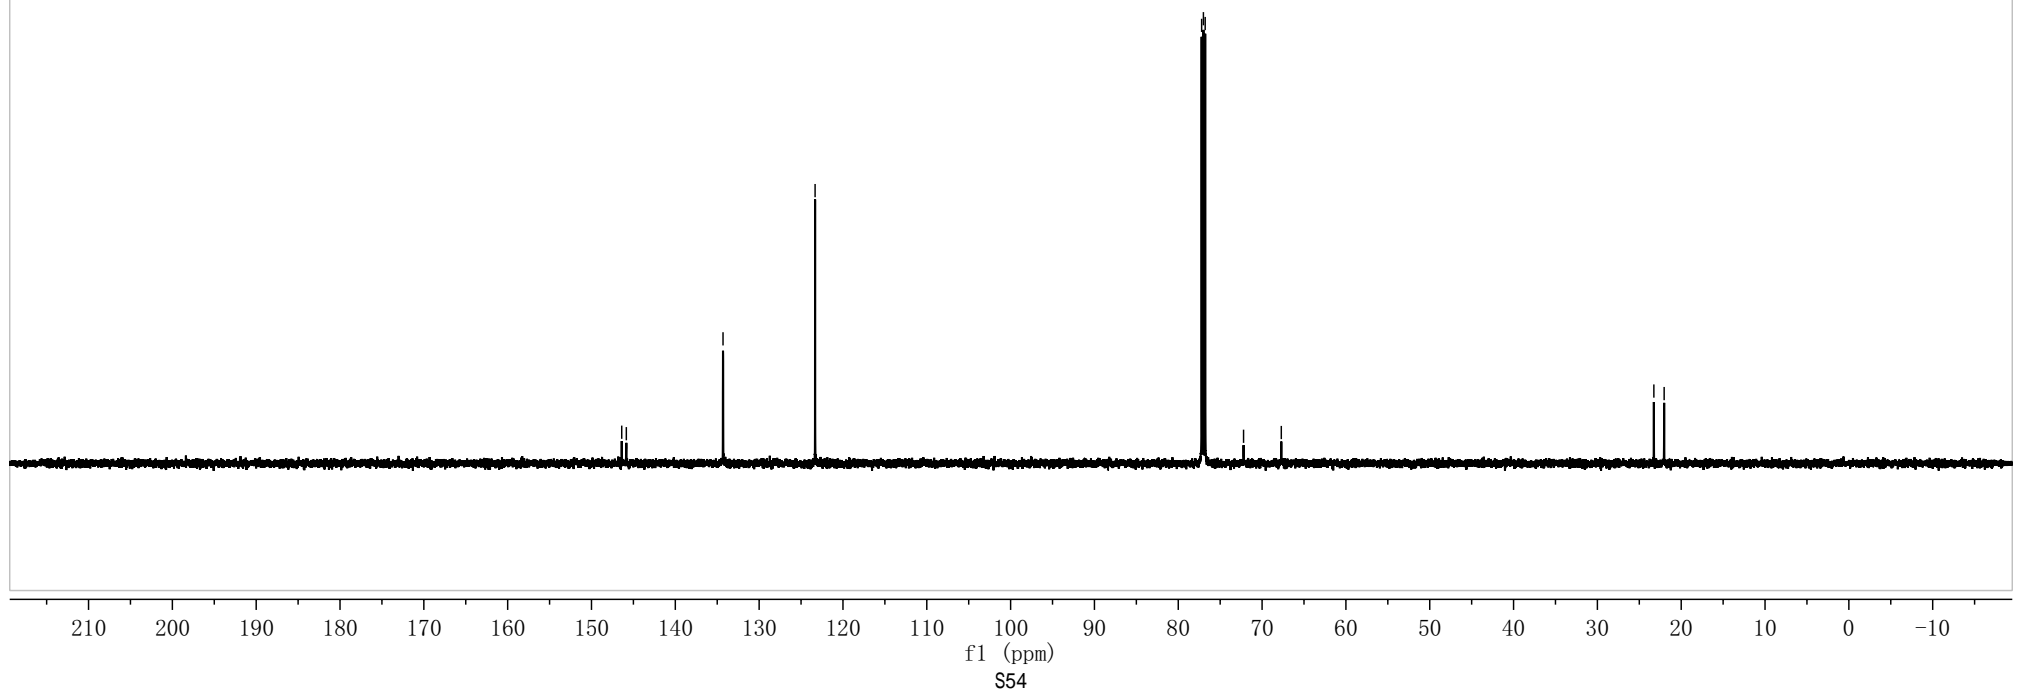



7.58  
7.57  
7.26  
7.19  
7.18  
7.17  
7.08  
7.06  
7.05

1.99  
1.98

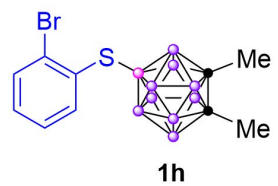

$^1\text{H NMR}$  (600 MHz,  $\text{CDCl}_3$ )

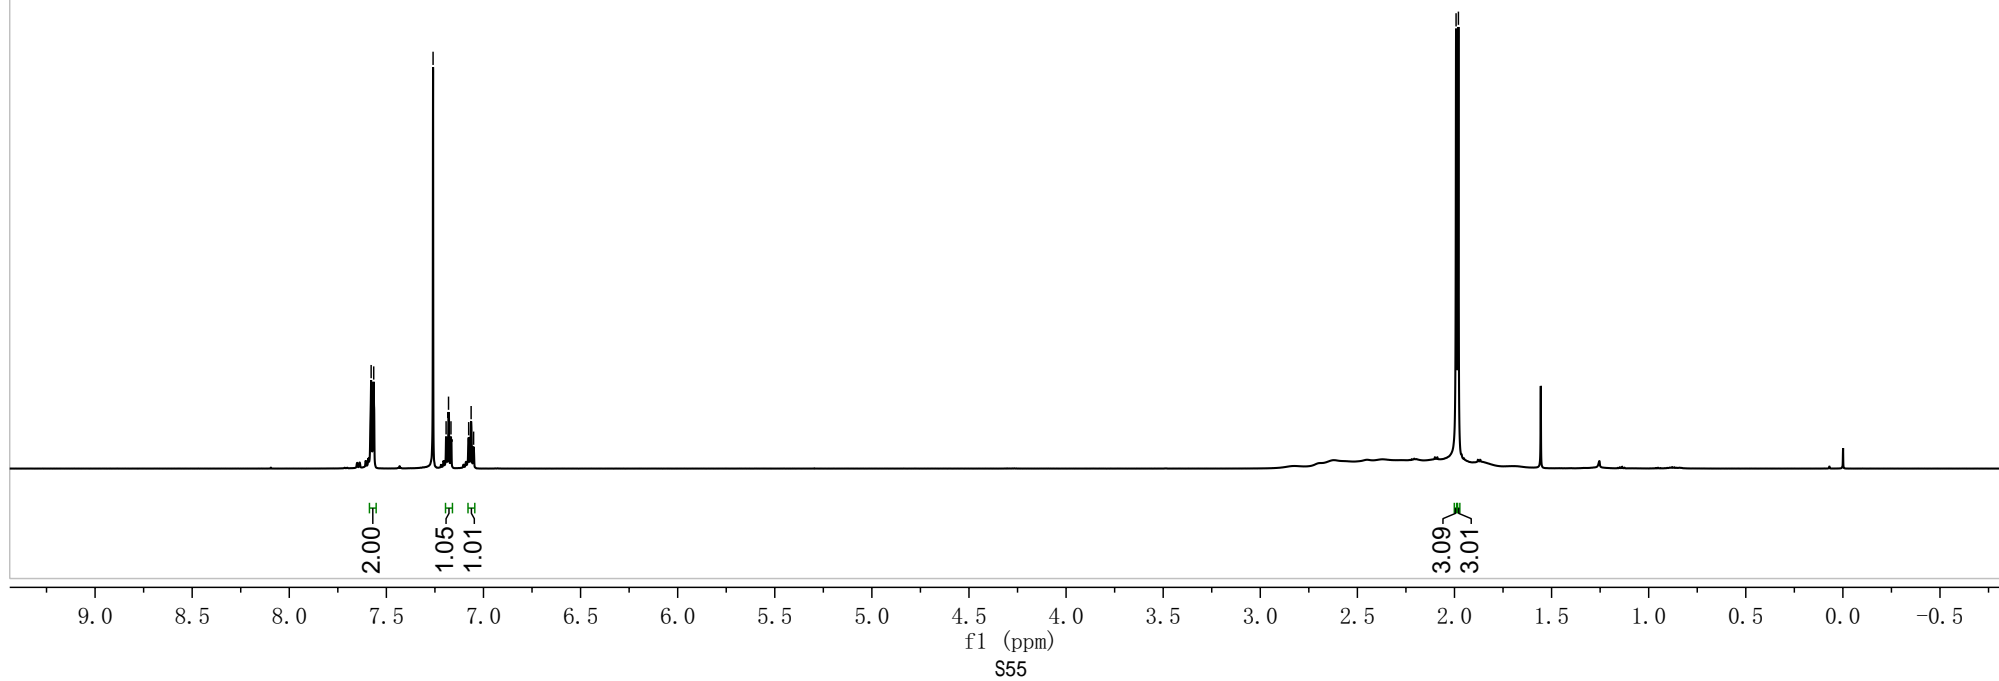

7.58  
7.57  
7.26  
7.19  
7.18  
7.16  
7.07  
7.06  
7.05

2.42  
2.33  
2.24  
2.12  
1.99  
1.98

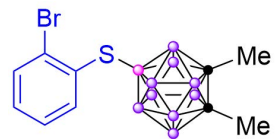

**1h**

$^1\text{H}\{^{11}\text{B}\}$  NMR (600 MHz,  $\text{CDCl}_3$ )

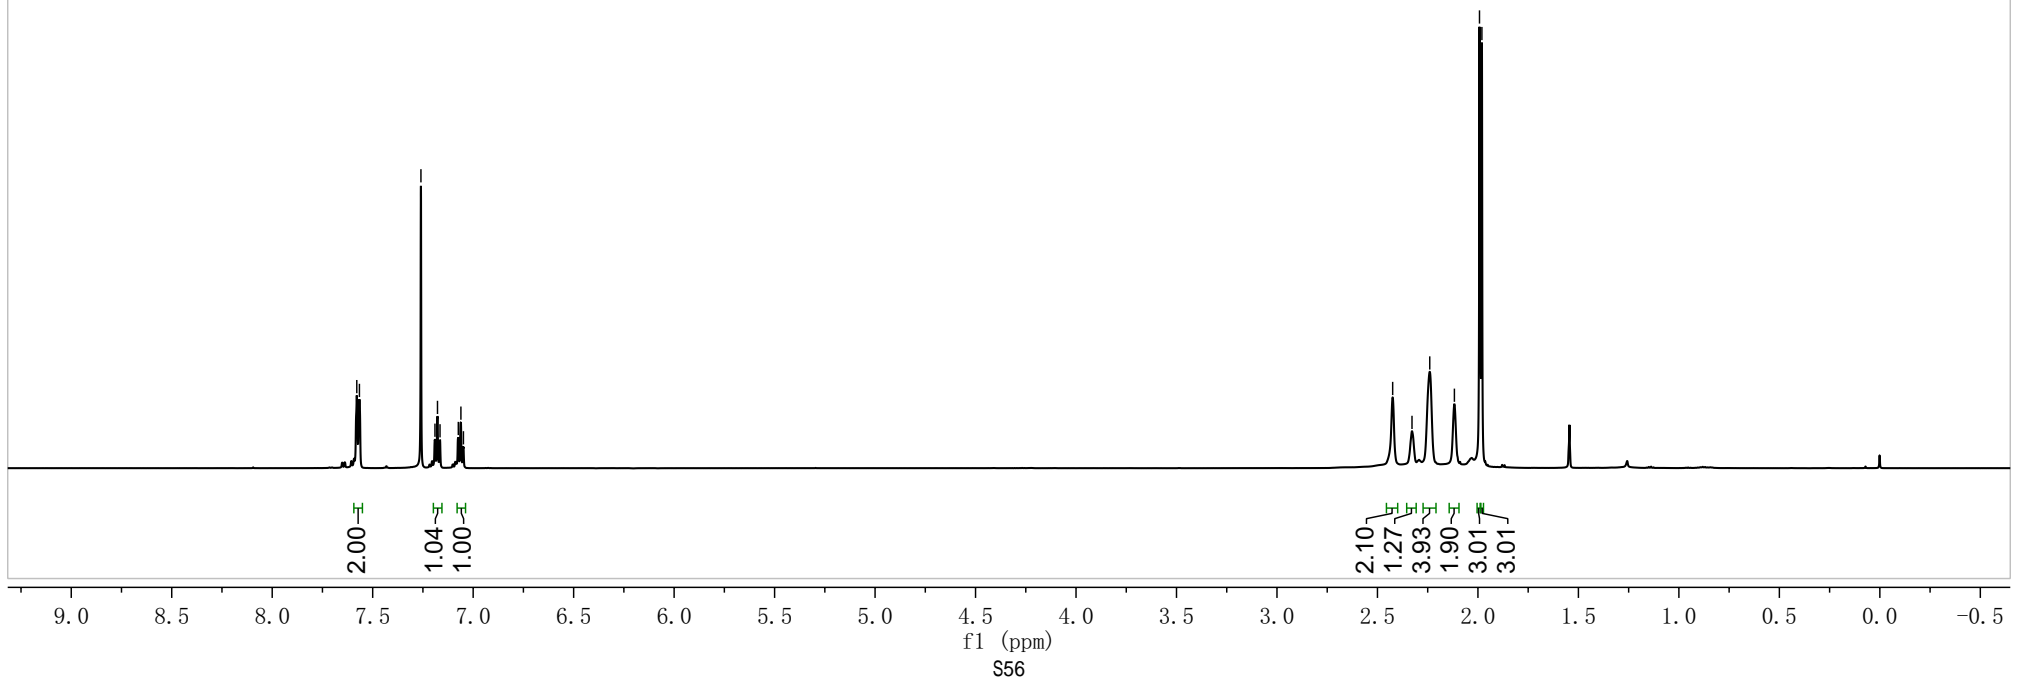

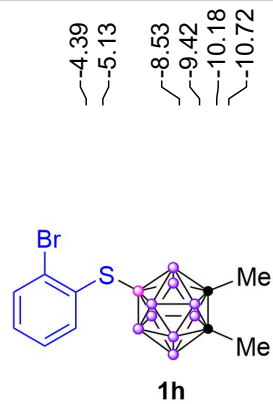

<sup>11</sup>B NMR (193 MHz, CDCl<sub>3</sub>)

Chemical shift values (ppm):  
-4.88  
-4.39  
-5.13  
-8.53  
-9.42  
-10.18  
-10.72

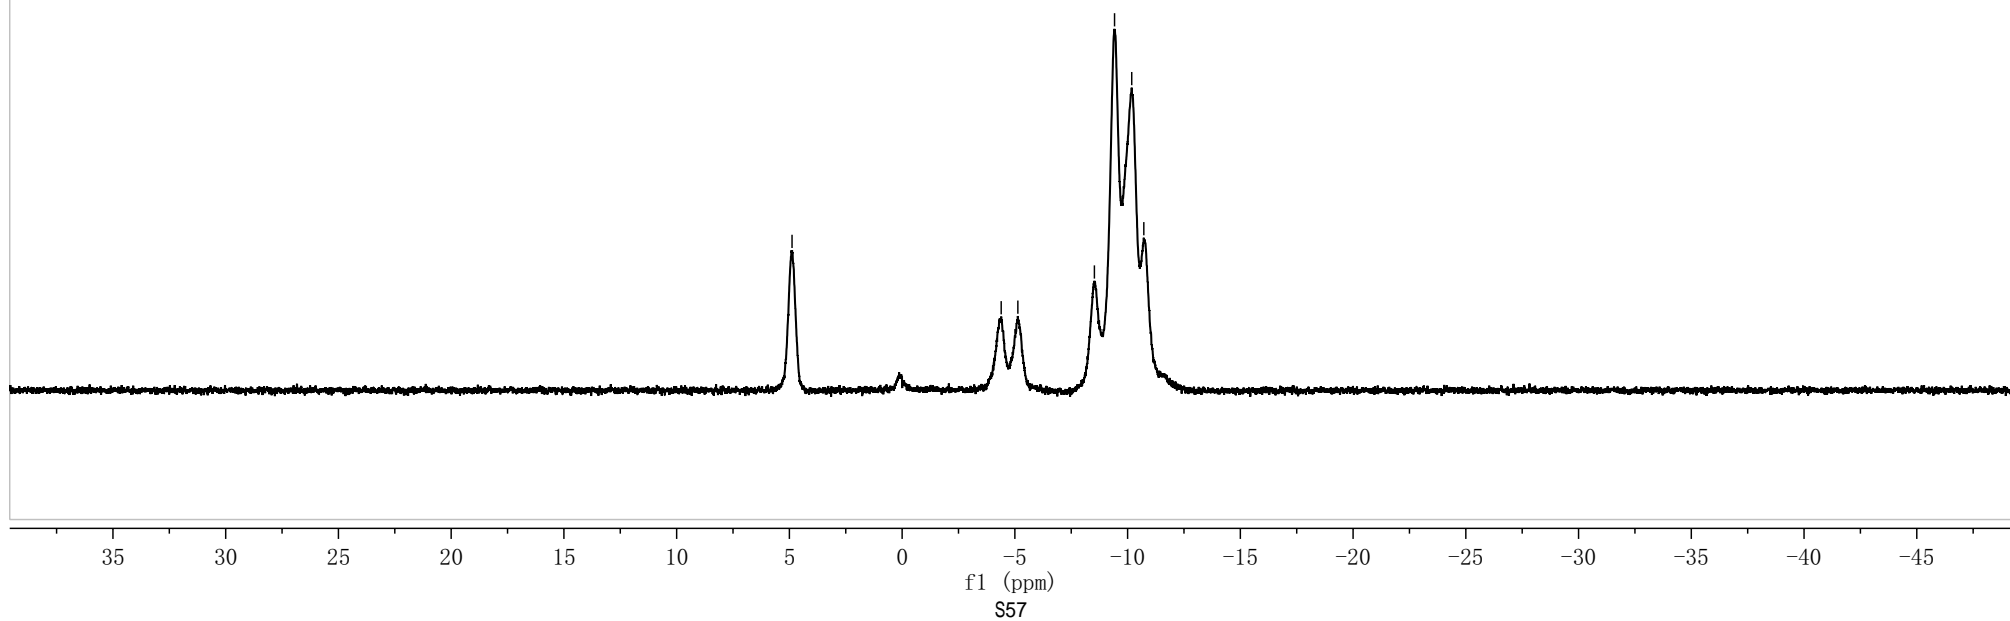

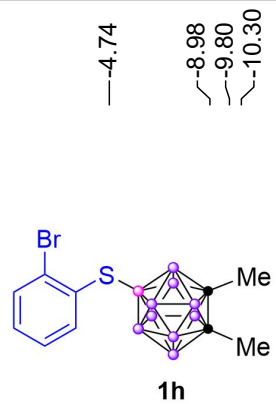

$^{11}\text{B}\{^1\text{H}\}$  NMR (193 MHz,  $\text{CDCl}_3$ )

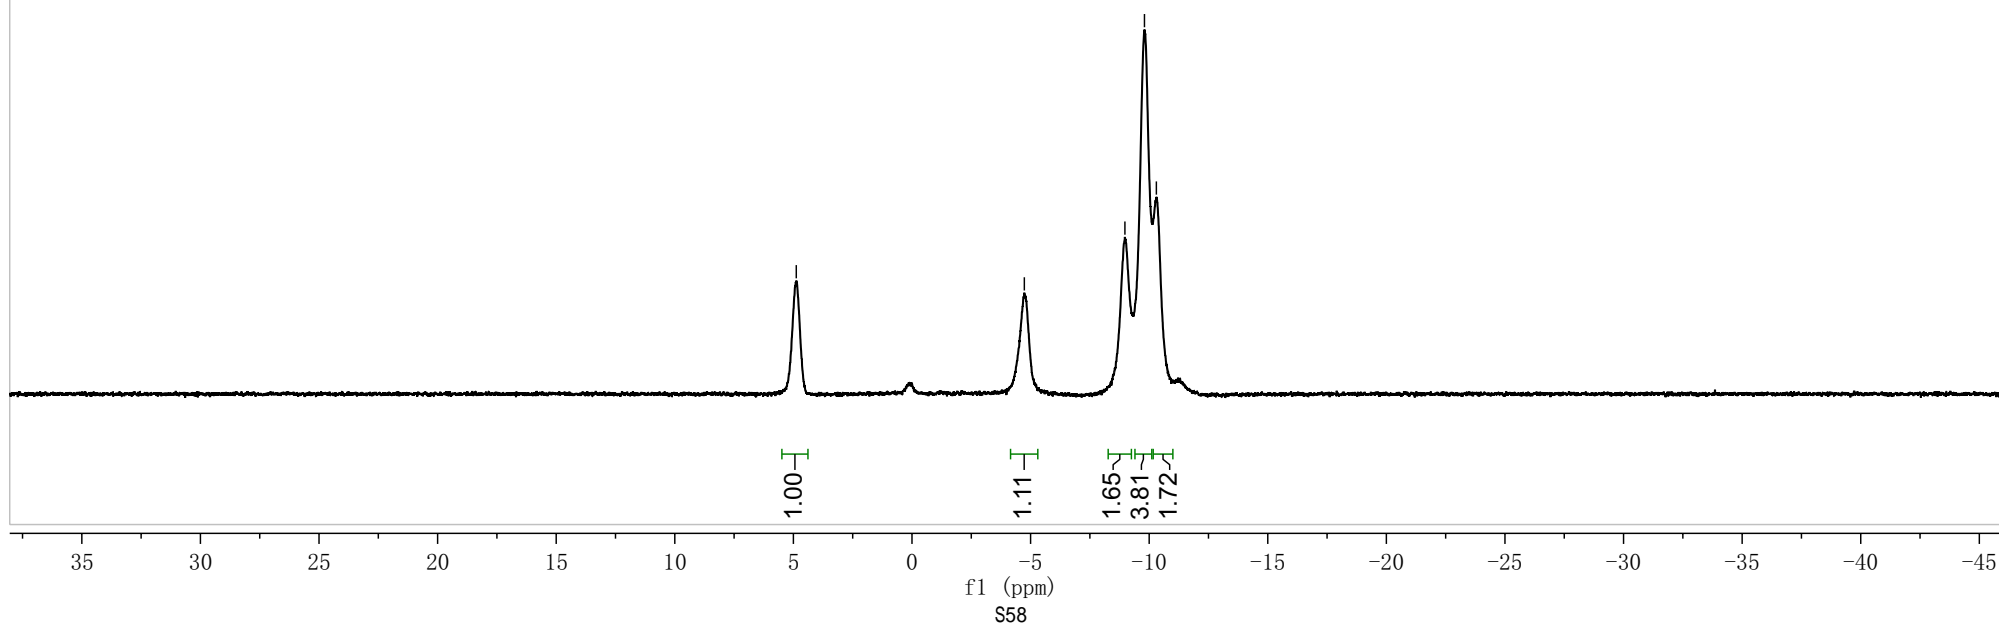

137.63  
137.16  
132.85  
130.27  
128.42  
127.23

77.21  
77.00  
76.79  
71.90  
66.91

23.28  
22.02

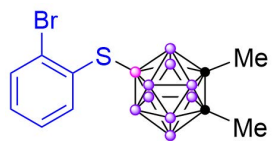

1h

<sup>13</sup>C NMR (151 MHz, CDCl<sub>3</sub>)

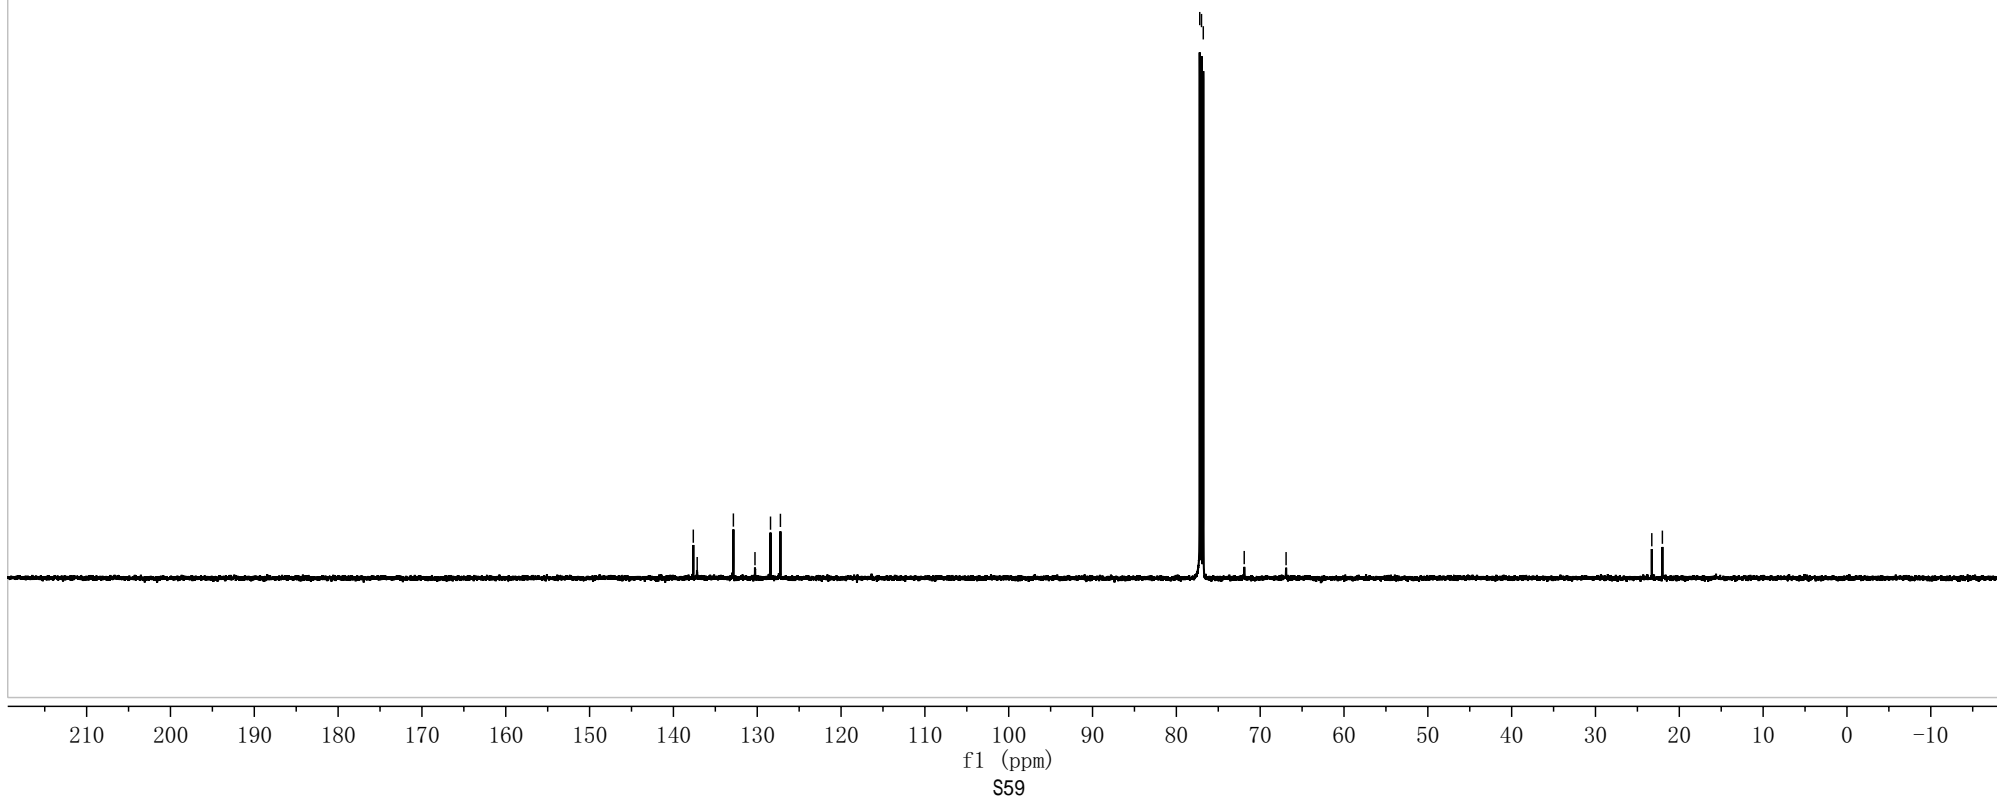

7.56  
7.55  
7.39  
7.38  
7.26  
7.17  
7.16  
7.14  
7.13  
7.12

1.99  
1.98

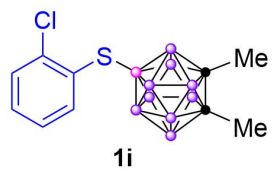

$^1\text{H NMR}$  (600 MHz,  $\text{CDCl}_3$ )

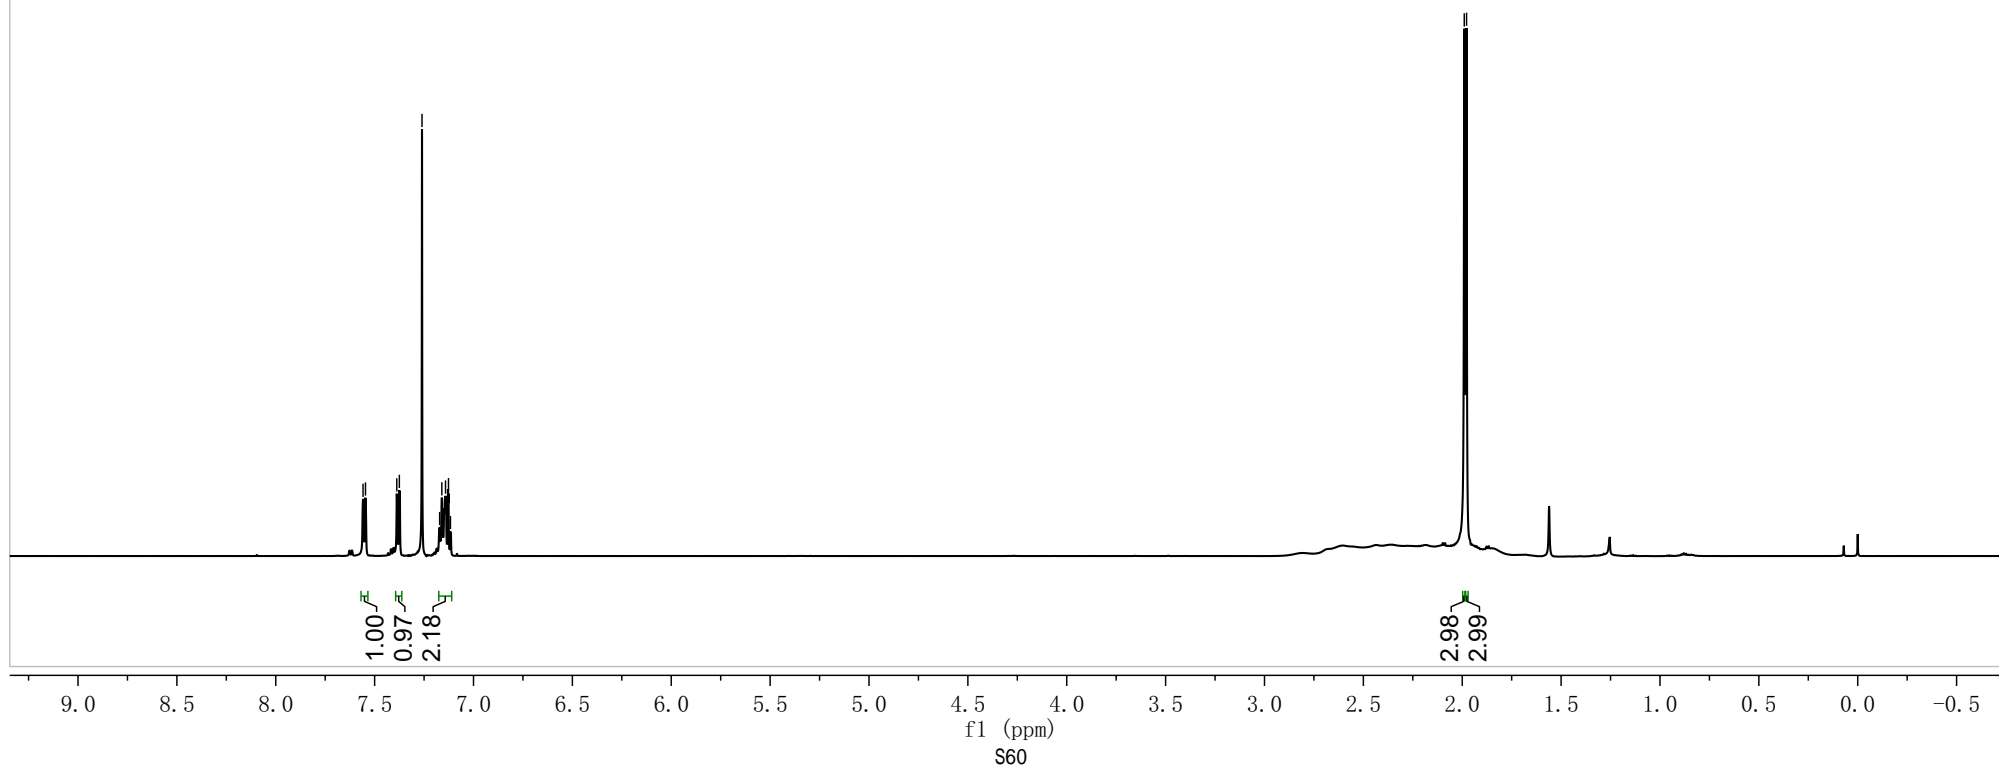

7.55  
7.54  
7.38  
7.37  
7.26  
7.17  
7.15  
7.14  
7.12  
7.11

2.40  
2.30  
2.22  
2.11  
1.98  
1.97

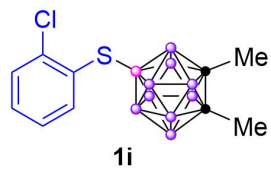

$^1\text{H}\{^{11}\text{B}\}$  NMR (600 MHz,  $\text{CDCl}_3$ )

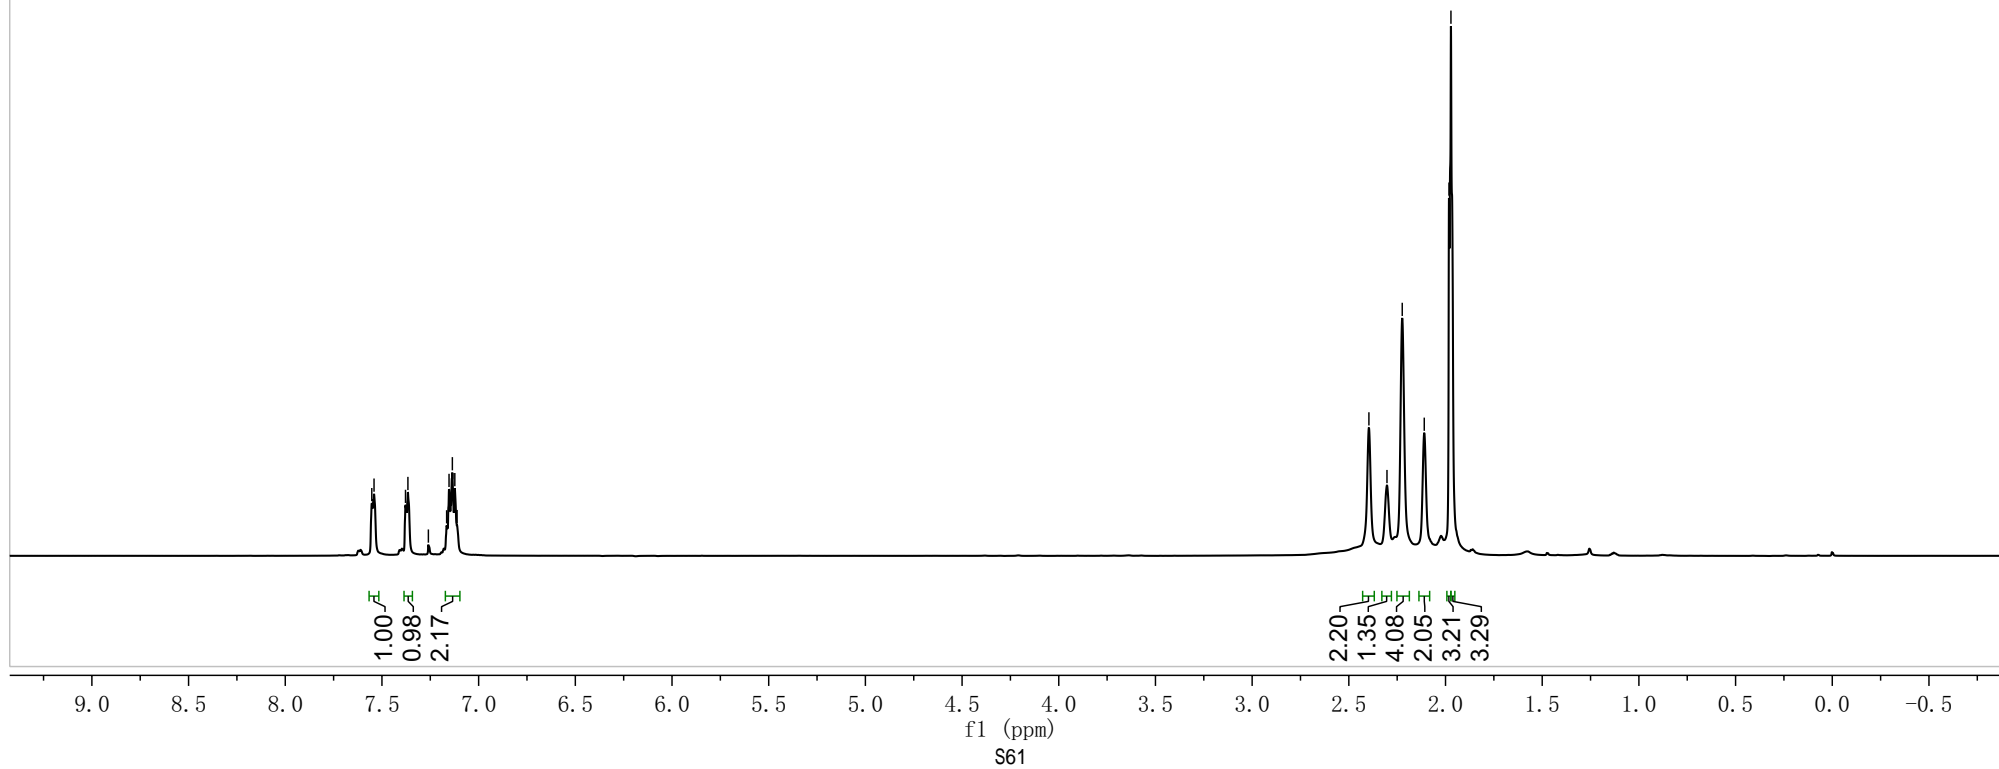

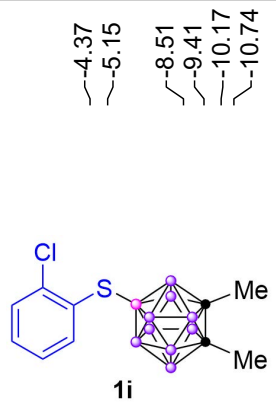

<sup>11</sup>B NMR (193 MHz, CDCl<sub>3</sub>)

Chemical shift values (ppm):  
-4.79  
-4.37  
-5.15  
-8.51  
-9.41  
-10.17  
-10.74

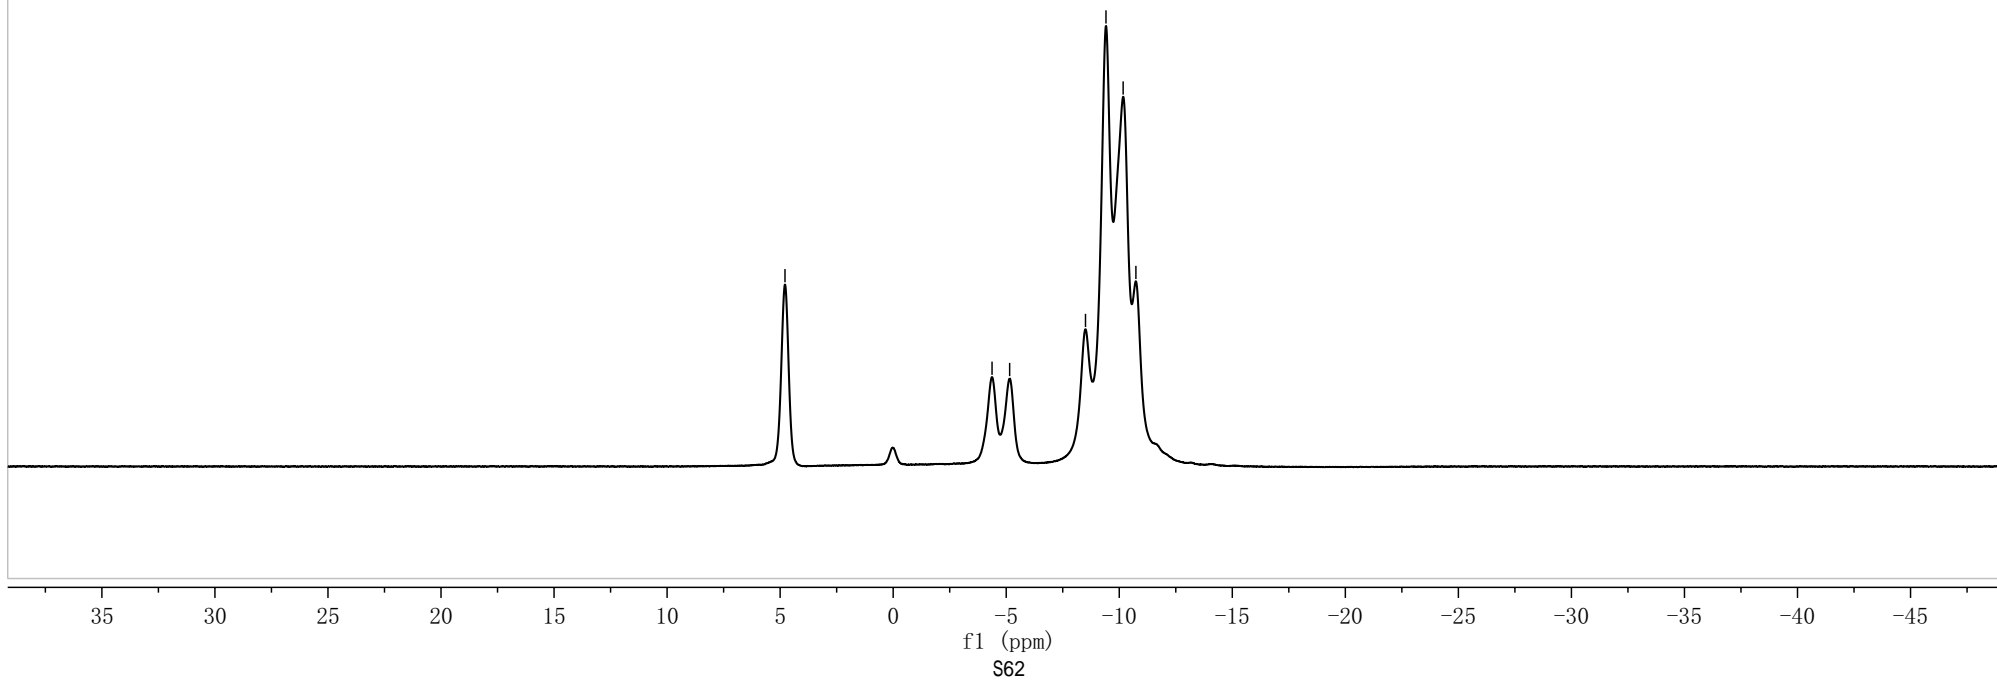



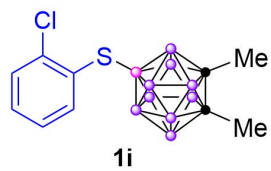

$^{11}\text{B}\{^1\text{H}\}$  NMR (193 MHz,  $\text{CDCl}_3$ )

—4.78  
—4.77  
—8.98  
—9.82  
—10.30

1.00  
1.13  
1.58  
3.58  
1.81

f1 (ppm)  
S63

35 30 25 20 15 10 5 0 -5 -10 -15 -20 -25 -30 -35 -40 -45

138.97  
137.79  
134.98  
129.51  
128.35  
126.55

77.21  
77.00  
76.79  
71.94  
66.82

23.26  
21.99

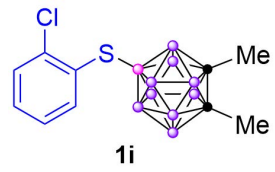

$^{13}\text{C}$  NMR (151 MHz,  $\text{CDCl}_3$ )

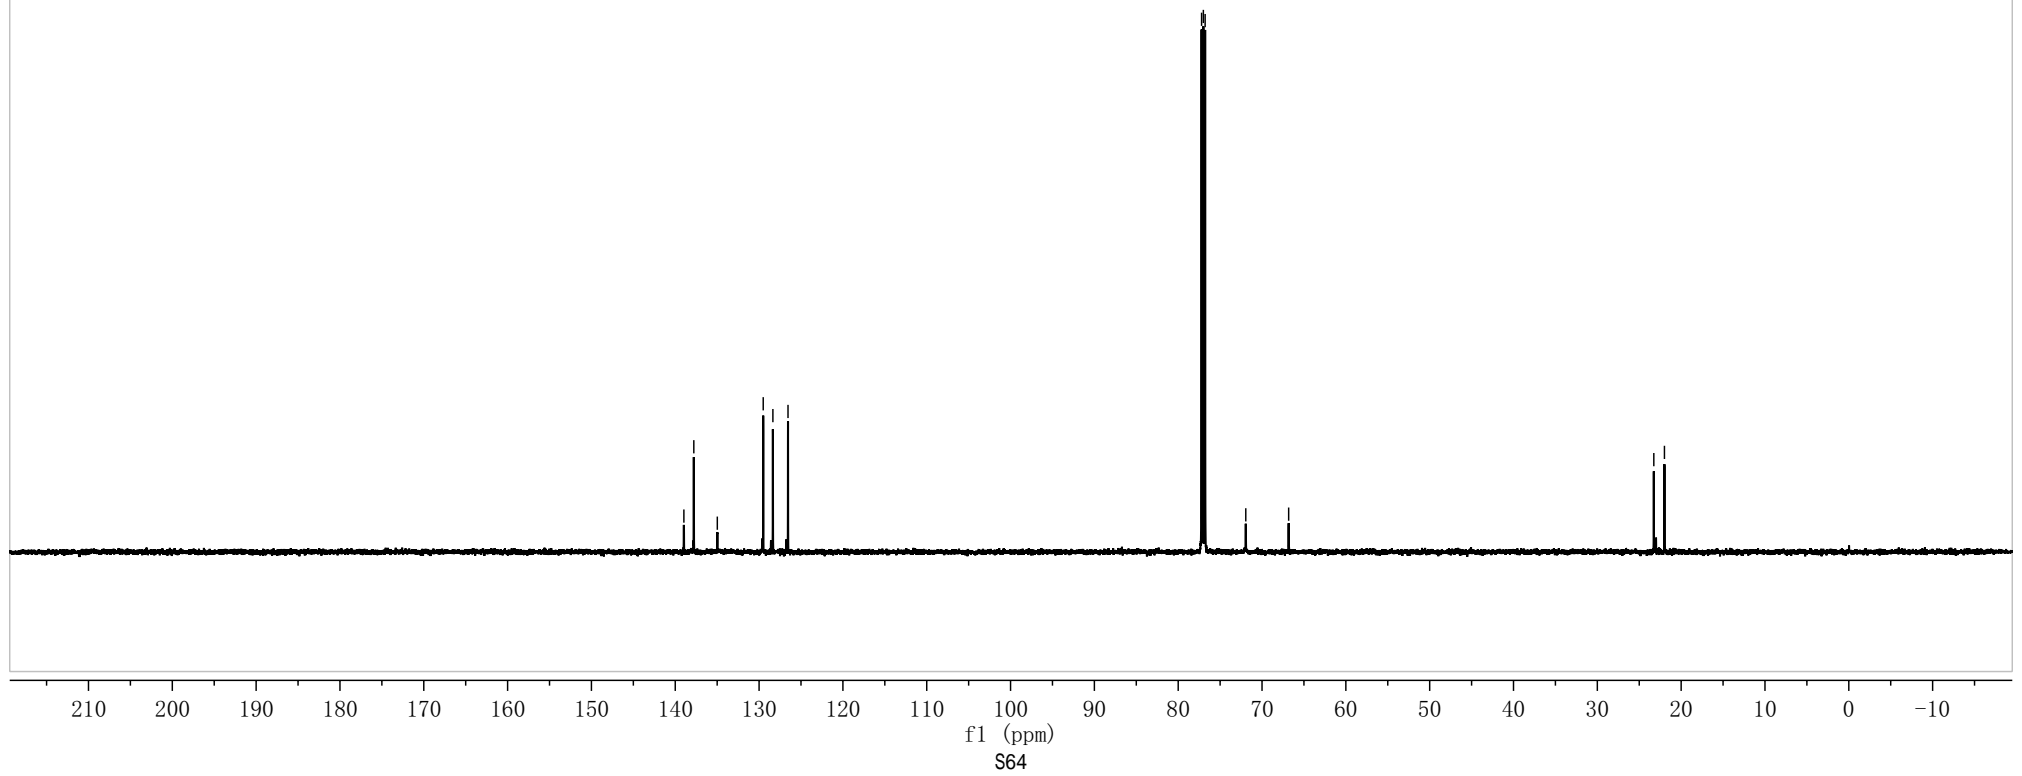

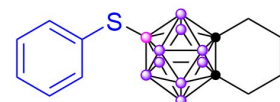

1j

$^1\text{H}$  NMR (600 MHz,  $\text{CDCl}_3$ )

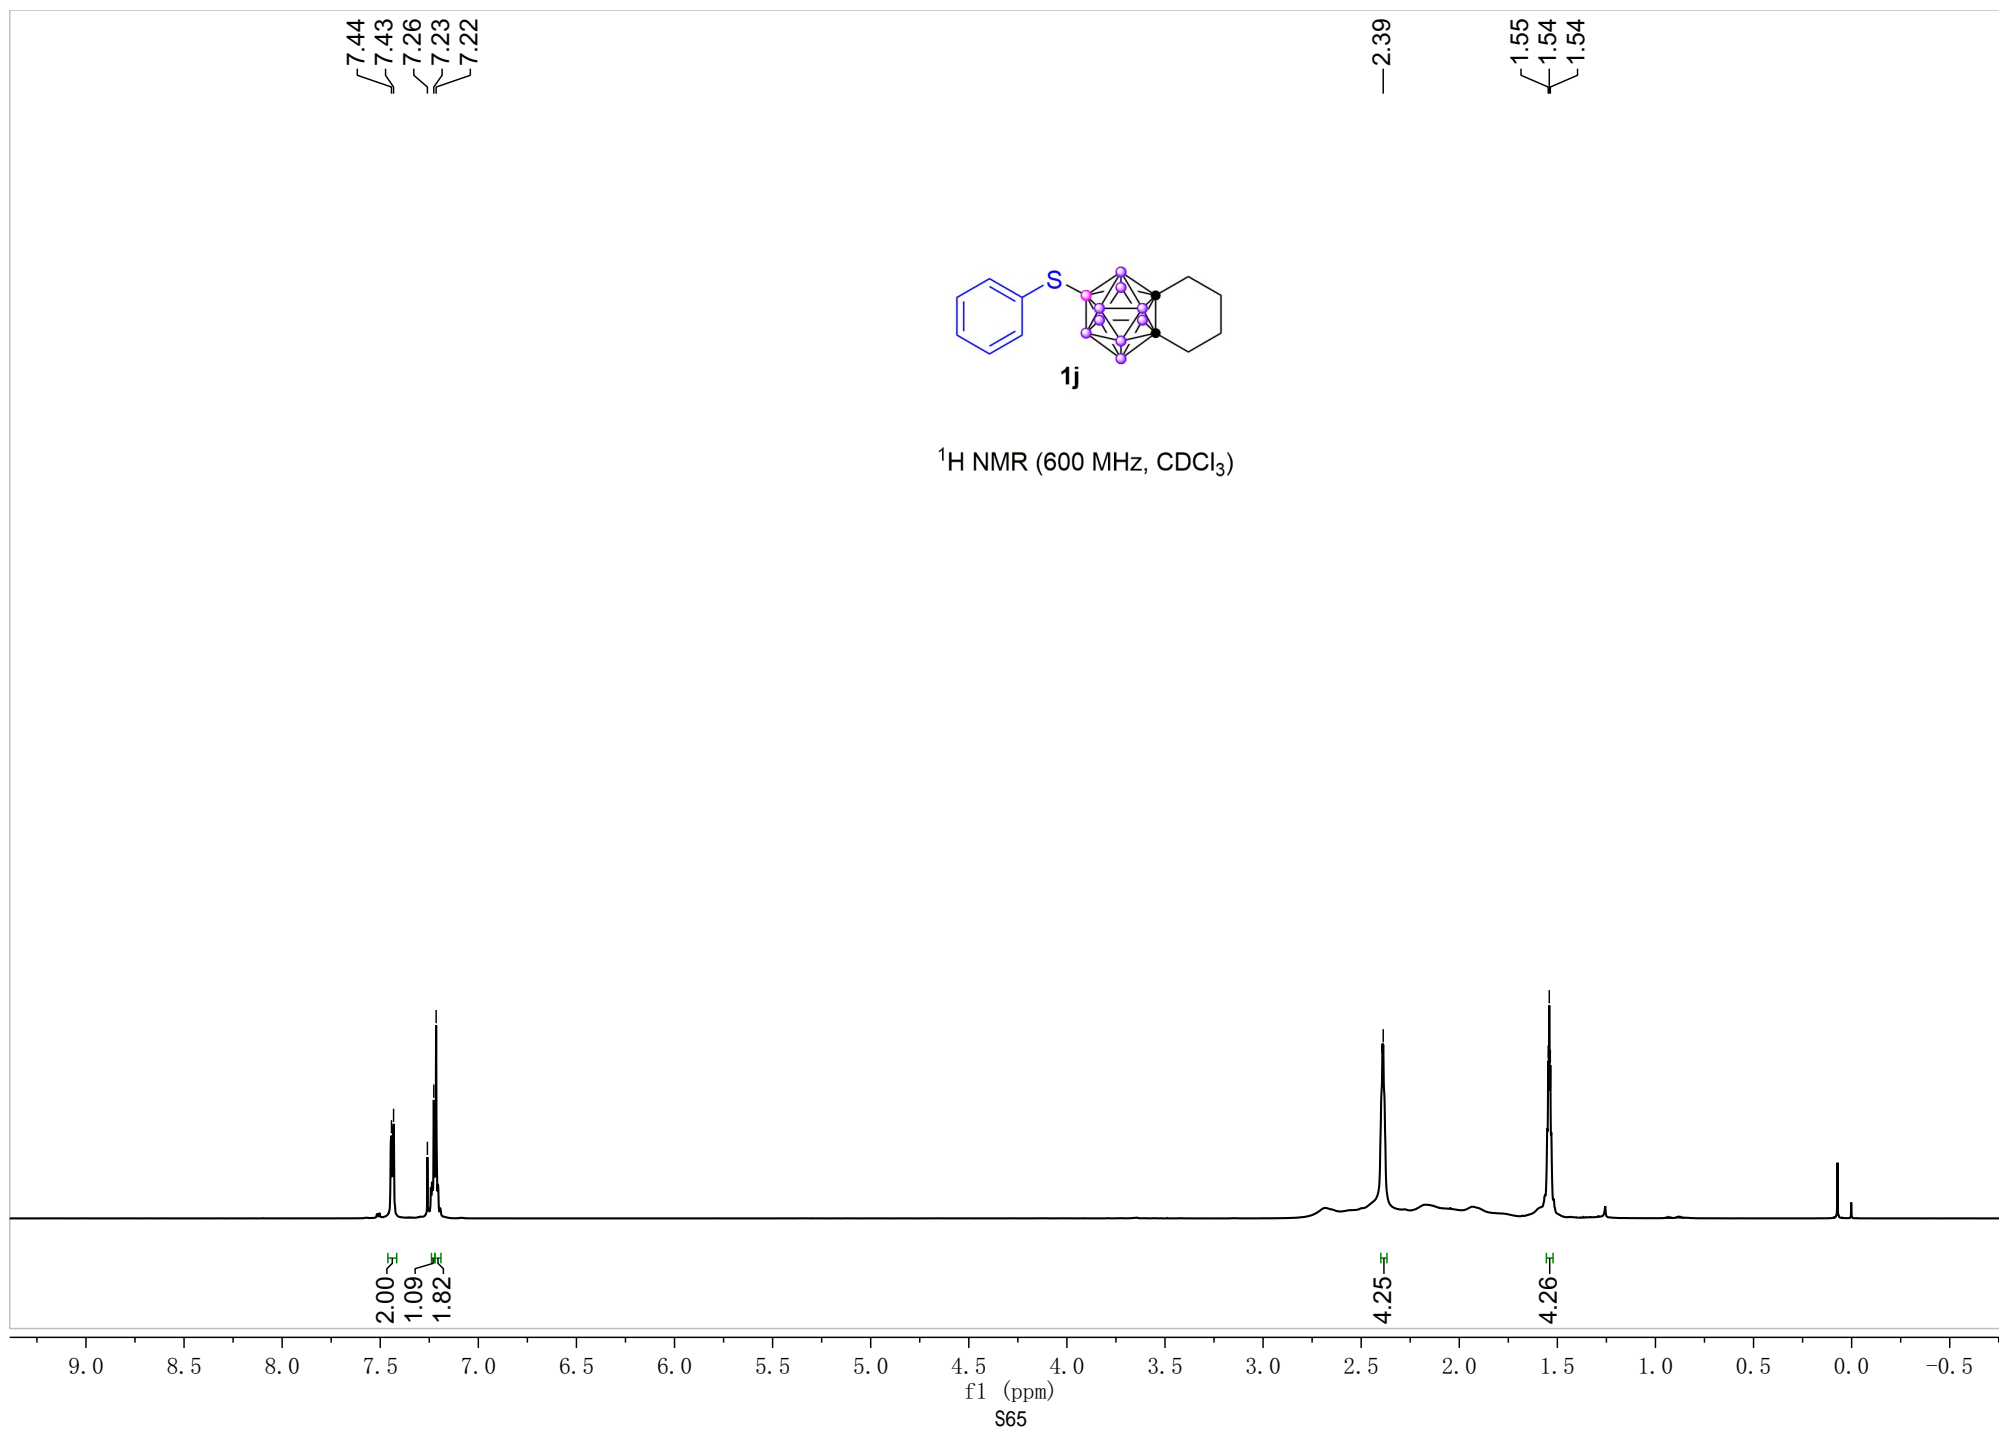

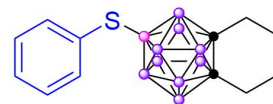

1j

$^1\text{H}\{^{11}\text{B}\}$  NMR (600 MHz,  $\text{CDCl}_3$ )

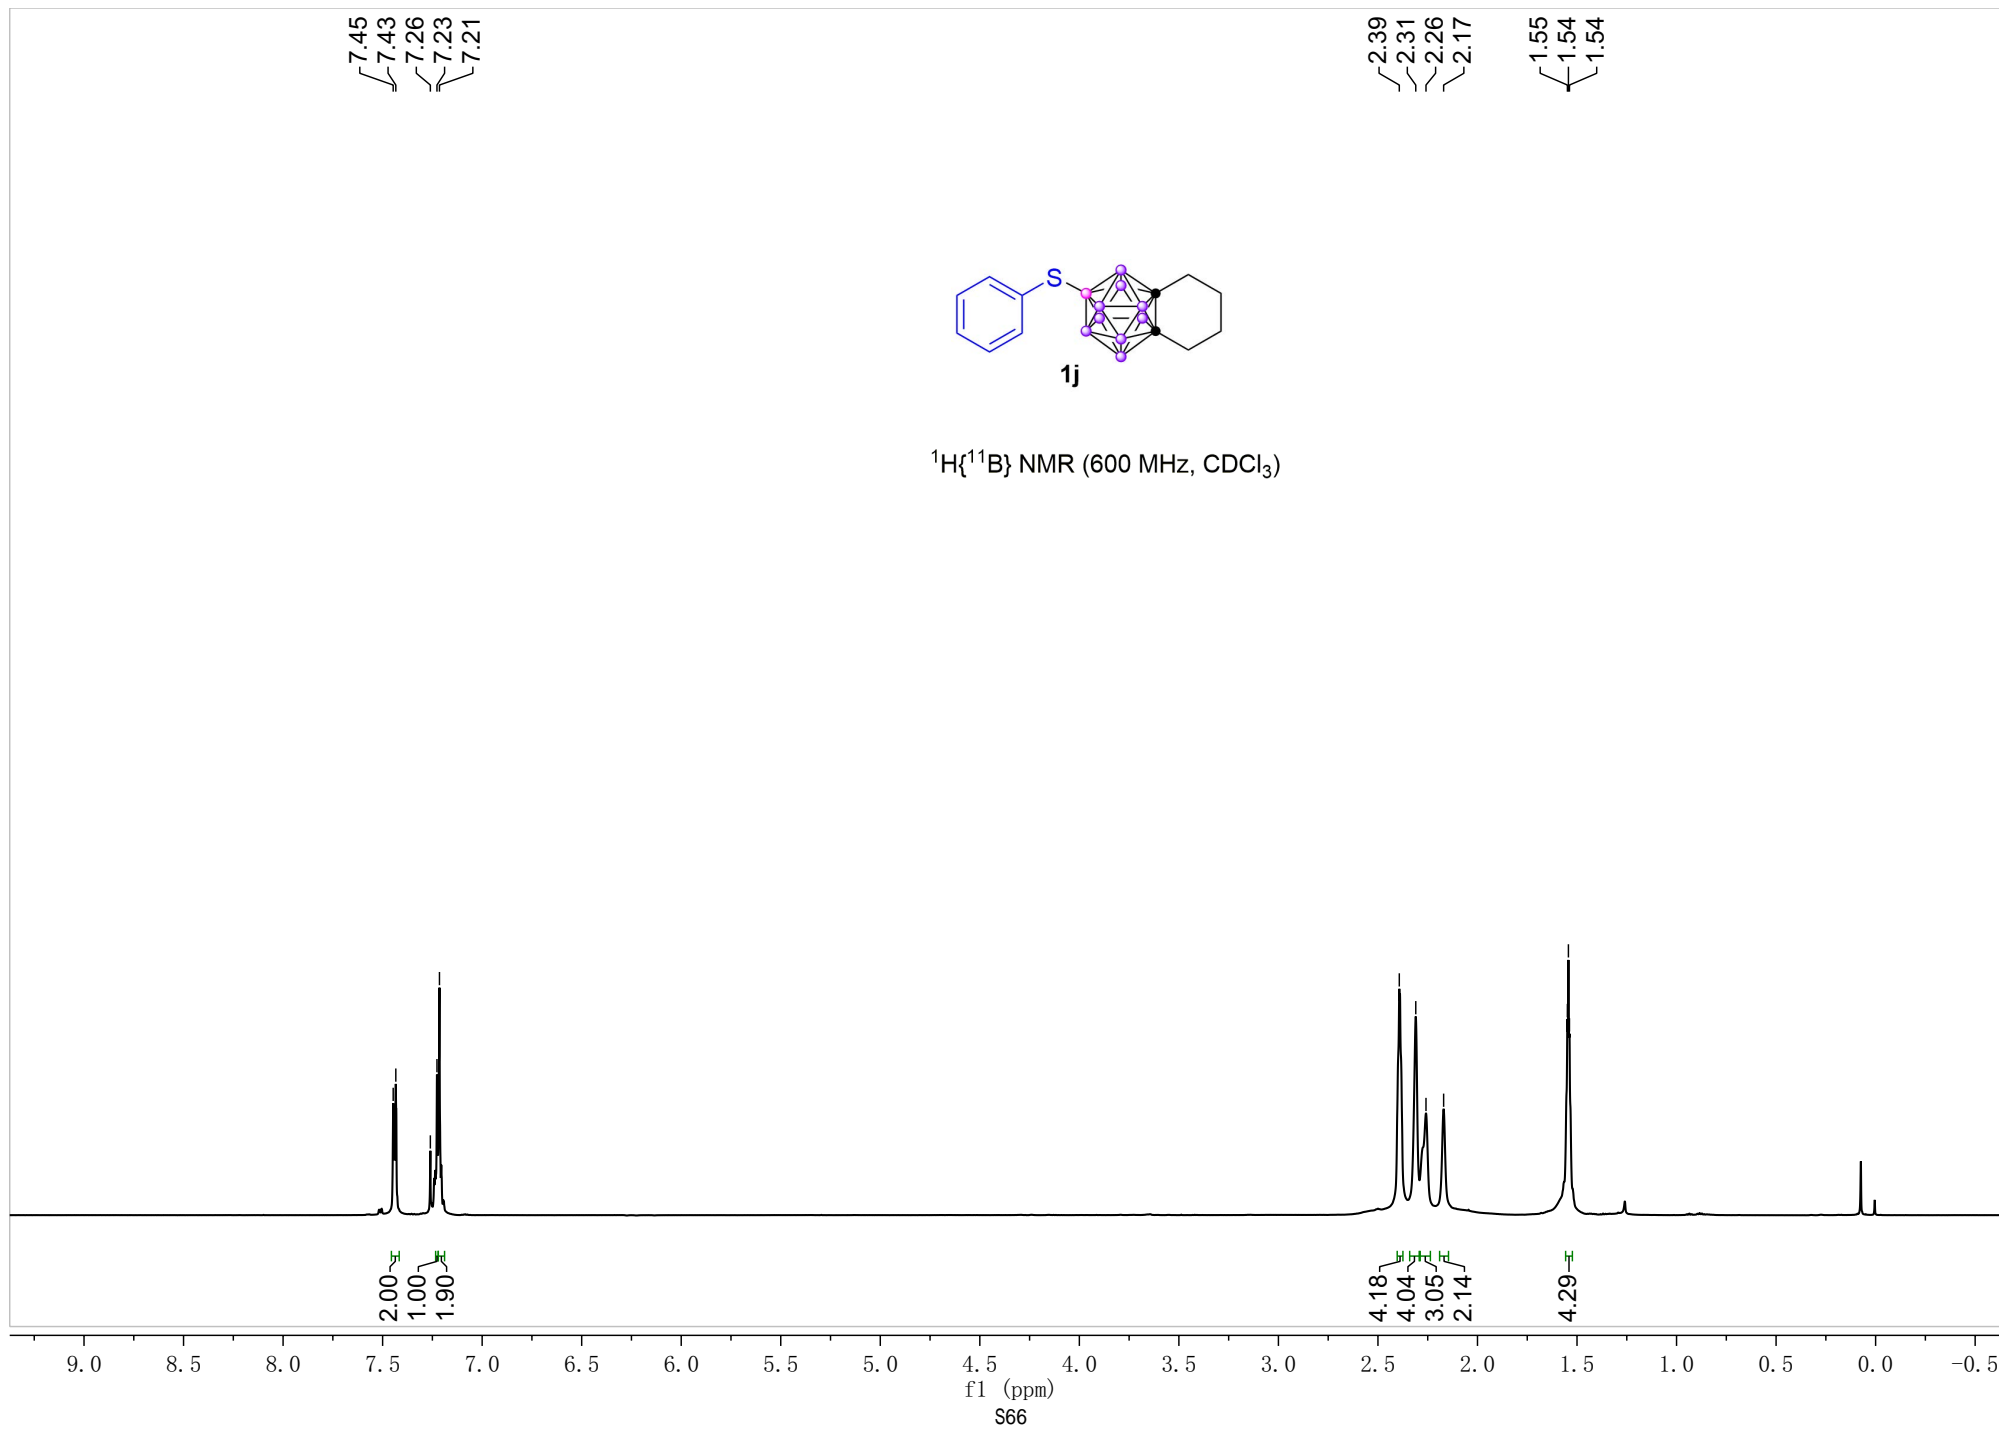

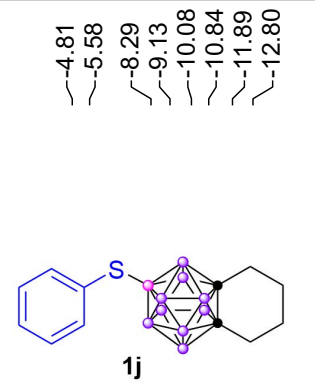

$^{11}\text{B}$  NMR (193 MHz,  $\text{CDCl}_3$ )

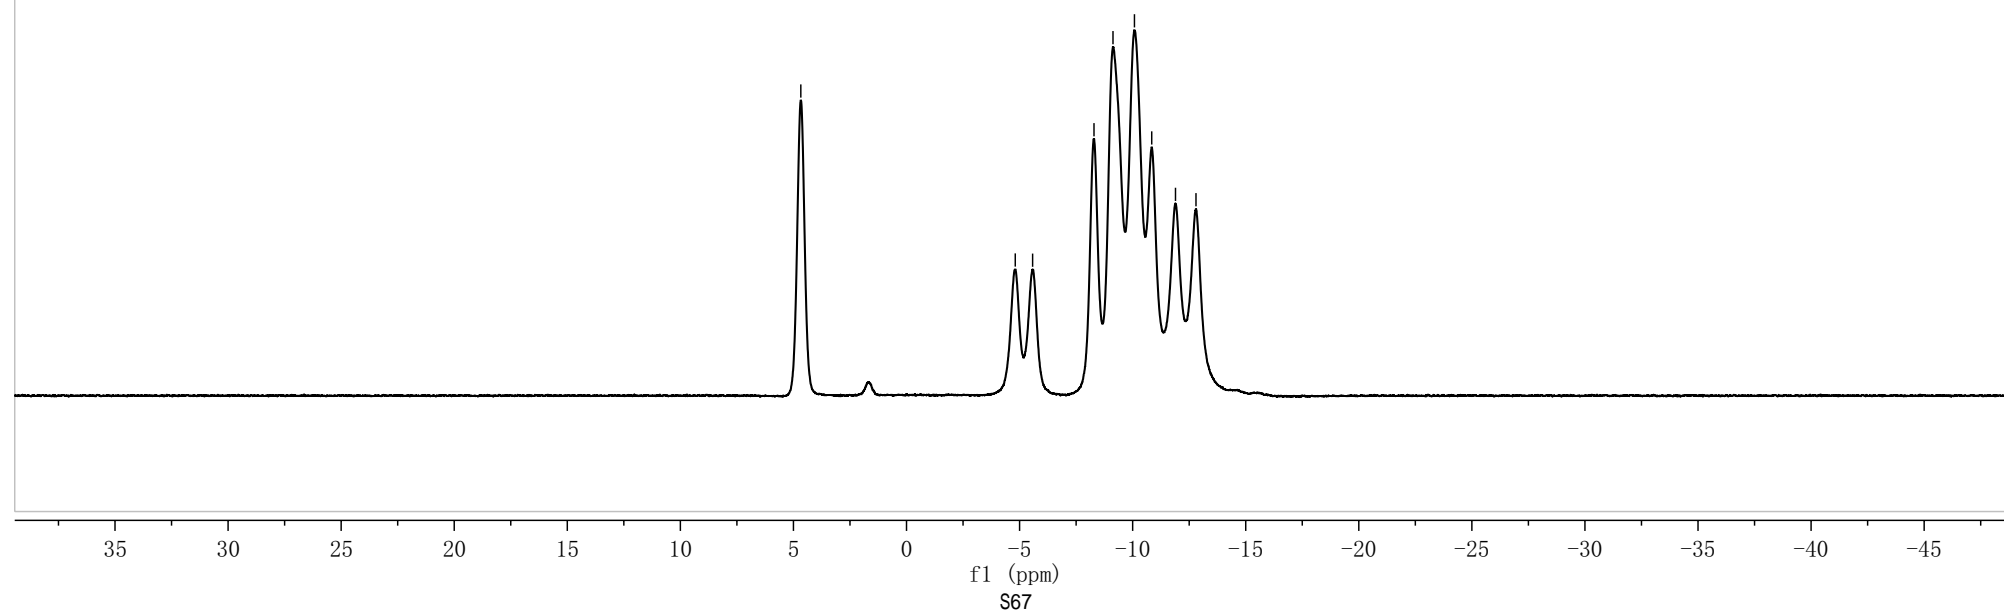

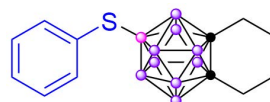

1j

$^{11}\text{B}\{^1\text{H}\}$  NMR (193 MHz,  $\text{CDCl}_3$ )

—4.67

—5.17

—8.68

—9.82

—10.42

—12.33

1.00

1.03

1.90

1.83

1.78

1.75

35

30

25

20

15

10

5

0

f1 (ppm)

S68

-5

-10

-15

-20

-25

-30

-35

-40

-45

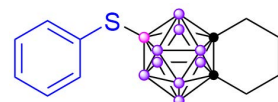

1j

<sup>13</sup>C NMR (151 MHz, CDCl<sub>3</sub>)

135.87  
134.86  
128.39  
126.70

77.21  
77.00  
76.79  
71.56  
66.21

32.71  
31.61

19.65  
19.40

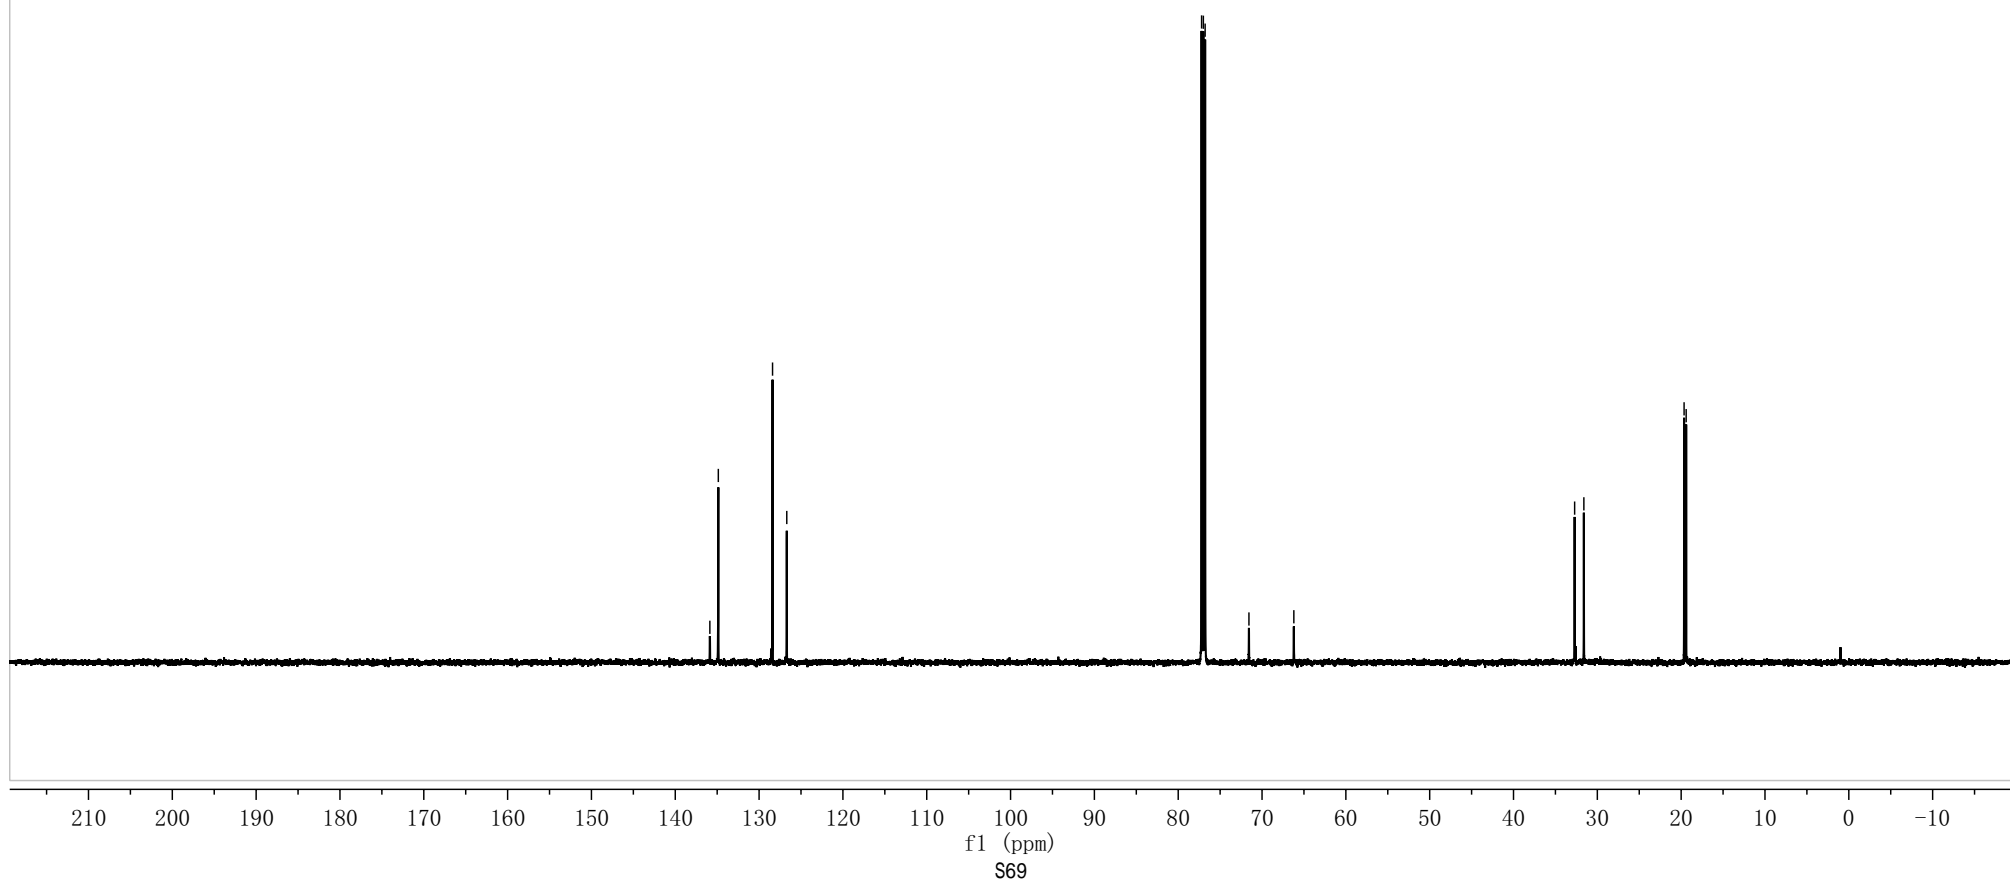

7.44  
7.43  
7.26  
7.23  
7.22

2.45  
2.44  
2.42

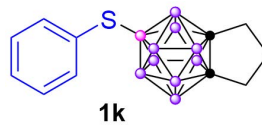

$^1\text{H}$  NMR (600 MHz,  $\text{CDCl}_3$ )

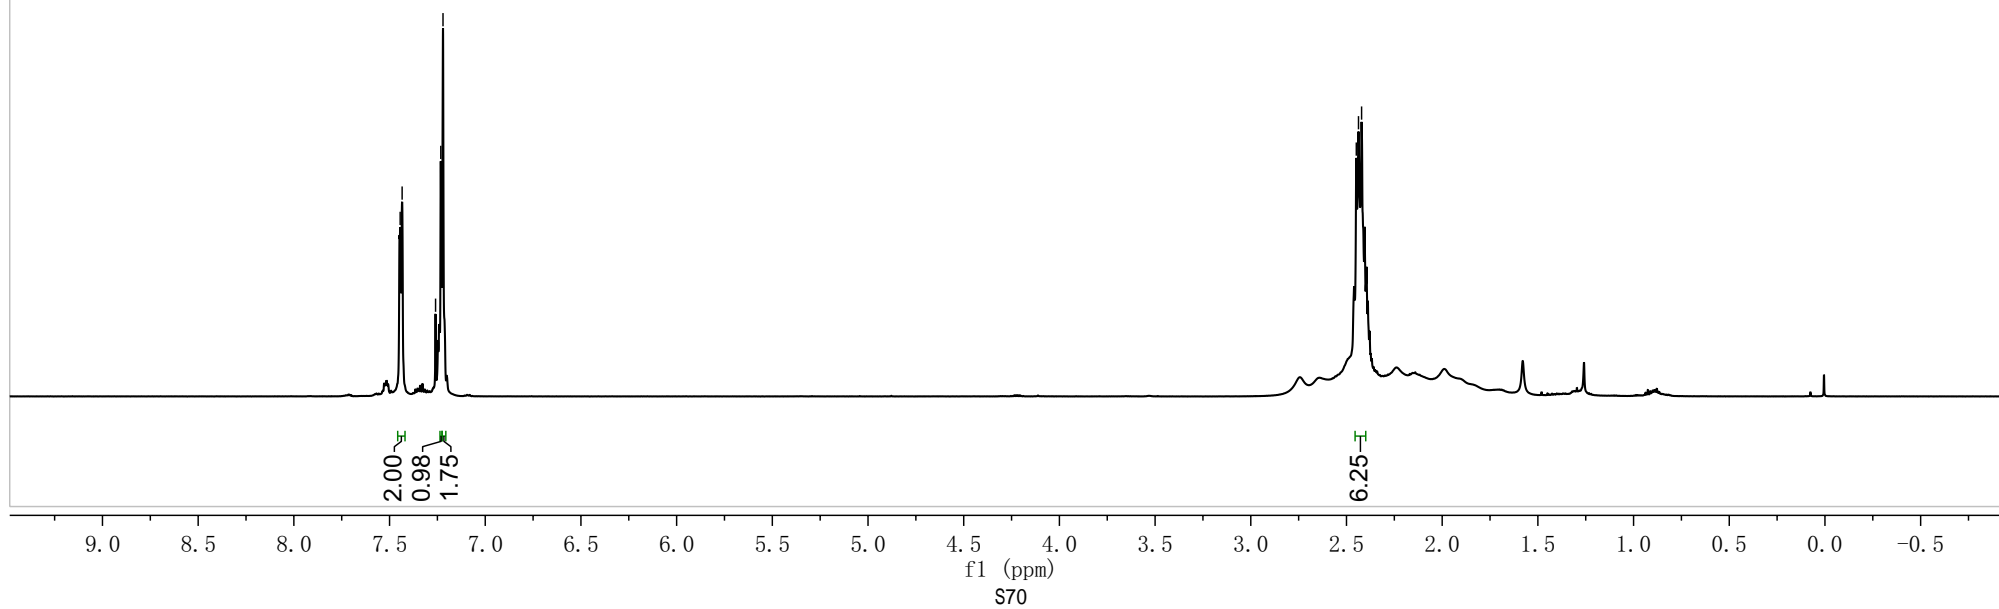



7.45  
7.44  
7.26  
7.23  
7.22

2.45  
2.44  
2.42  
2.37  
2.35  
2.28  
2.24  
2.13

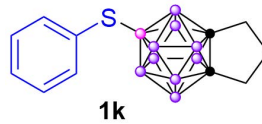

$^1\text{H}\{^{11}\text{B}\}$  NMR (600 MHz,  $\text{CDCl}_3$ )

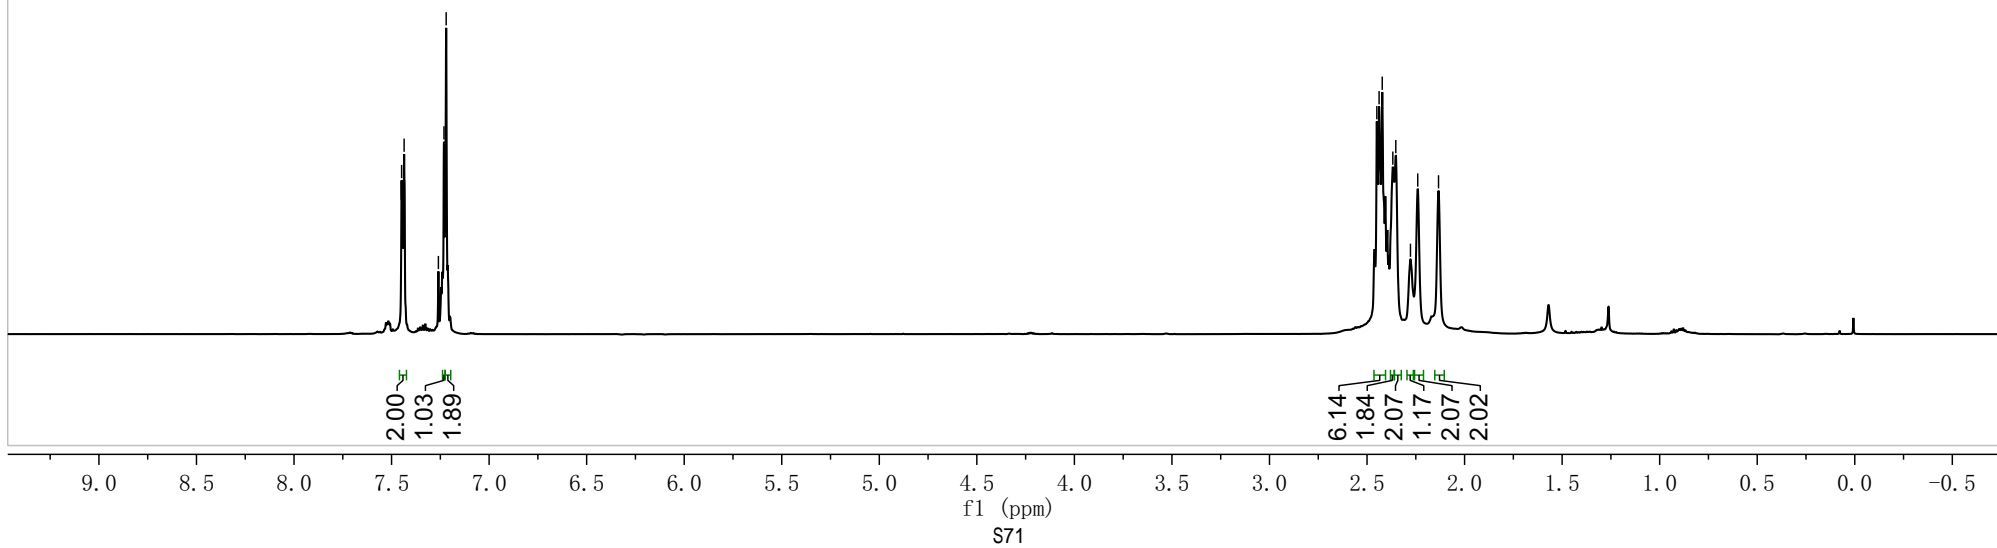

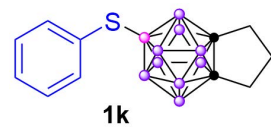

$^{11}\text{B}$  NMR (193 MHz,  $\text{CDCl}_3$ )

—4.19  
—5.65  
—6.41  
—7.07  
—7.86  
—9.25  
—10.15  
—11.41  
—12.14  
—12.92

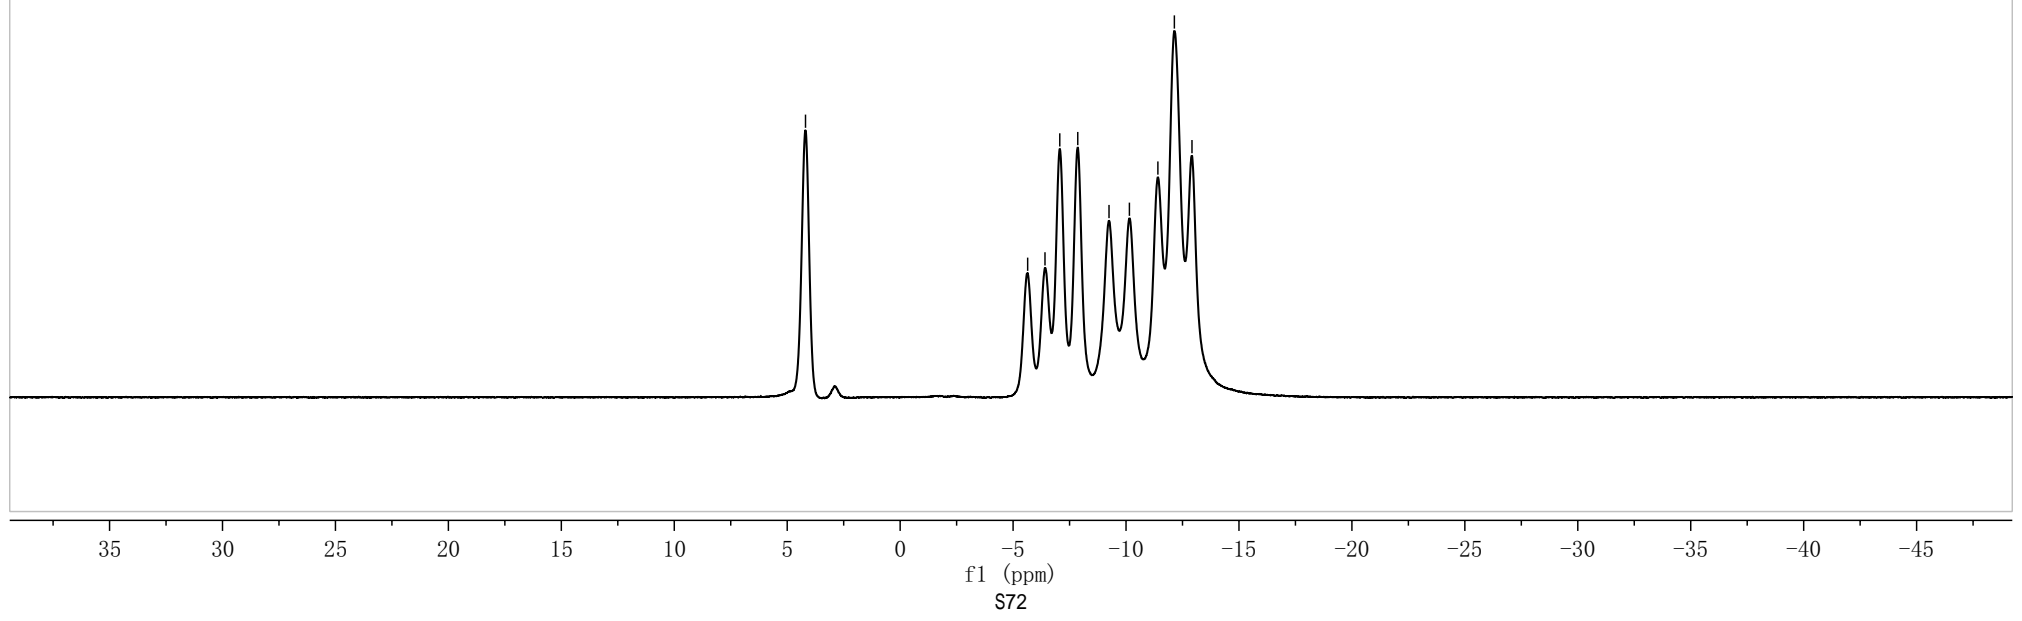

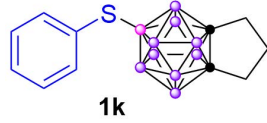

$^{11}\text{B}\{^1\text{H}\}$  NMR (193 MHz,  $\text{CDCl}_3$ )

—4.19

-6.03  
-7.47  
-9.70  
-11.84  
-12.49

1.00

1.01

1.86

1.76

1.79

1.90

35 30 25 20 15 10 5 0 -5 -10 -15 -20 -25 -30 -35 -40 -45

f1 (ppm)

S73

135.87  
134.92  
128.40  
126.73

82.87  
77.79  
77.21  
77.00  
76.79

34.36  
33.34  
32.33

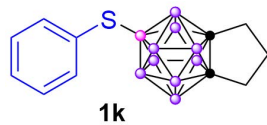

$^{13}\text{C}$  NMR (151 MHz,  $\text{CDCl}_3$ )

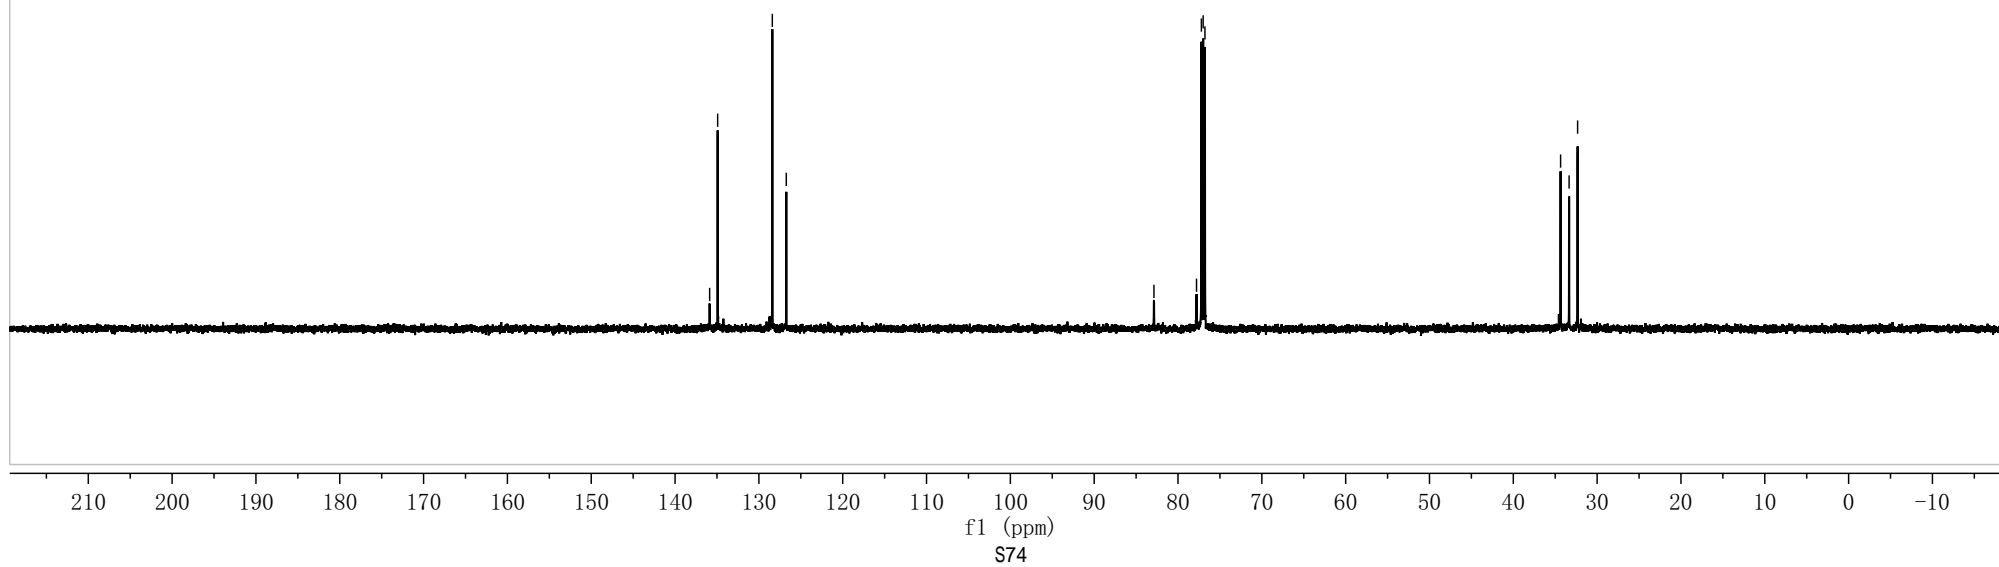

7.59  
7.57  
7.29  
7.28  
7.26  
7.25  
7.23  
7.21

3.55

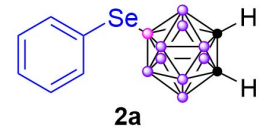

<sup>1</sup>H NMR (400 MHz, CDCl<sub>3</sub>)

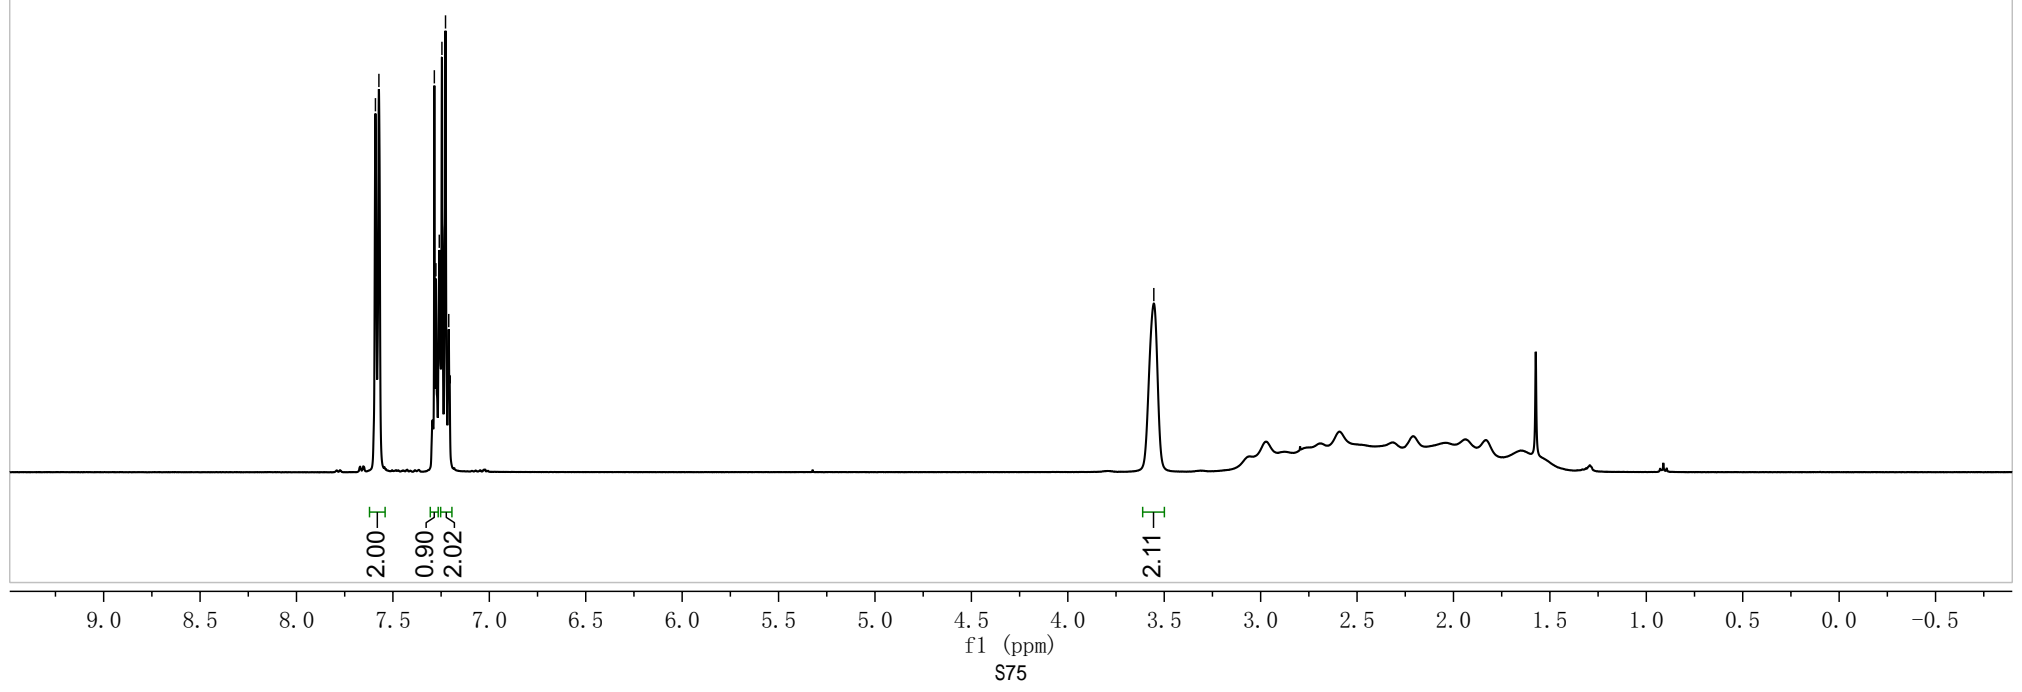

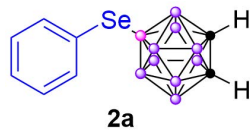

$^1\text{H}\{^{11}\text{B}\}$  NMR (400 MHz,  $\text{CDCl}_3$ )

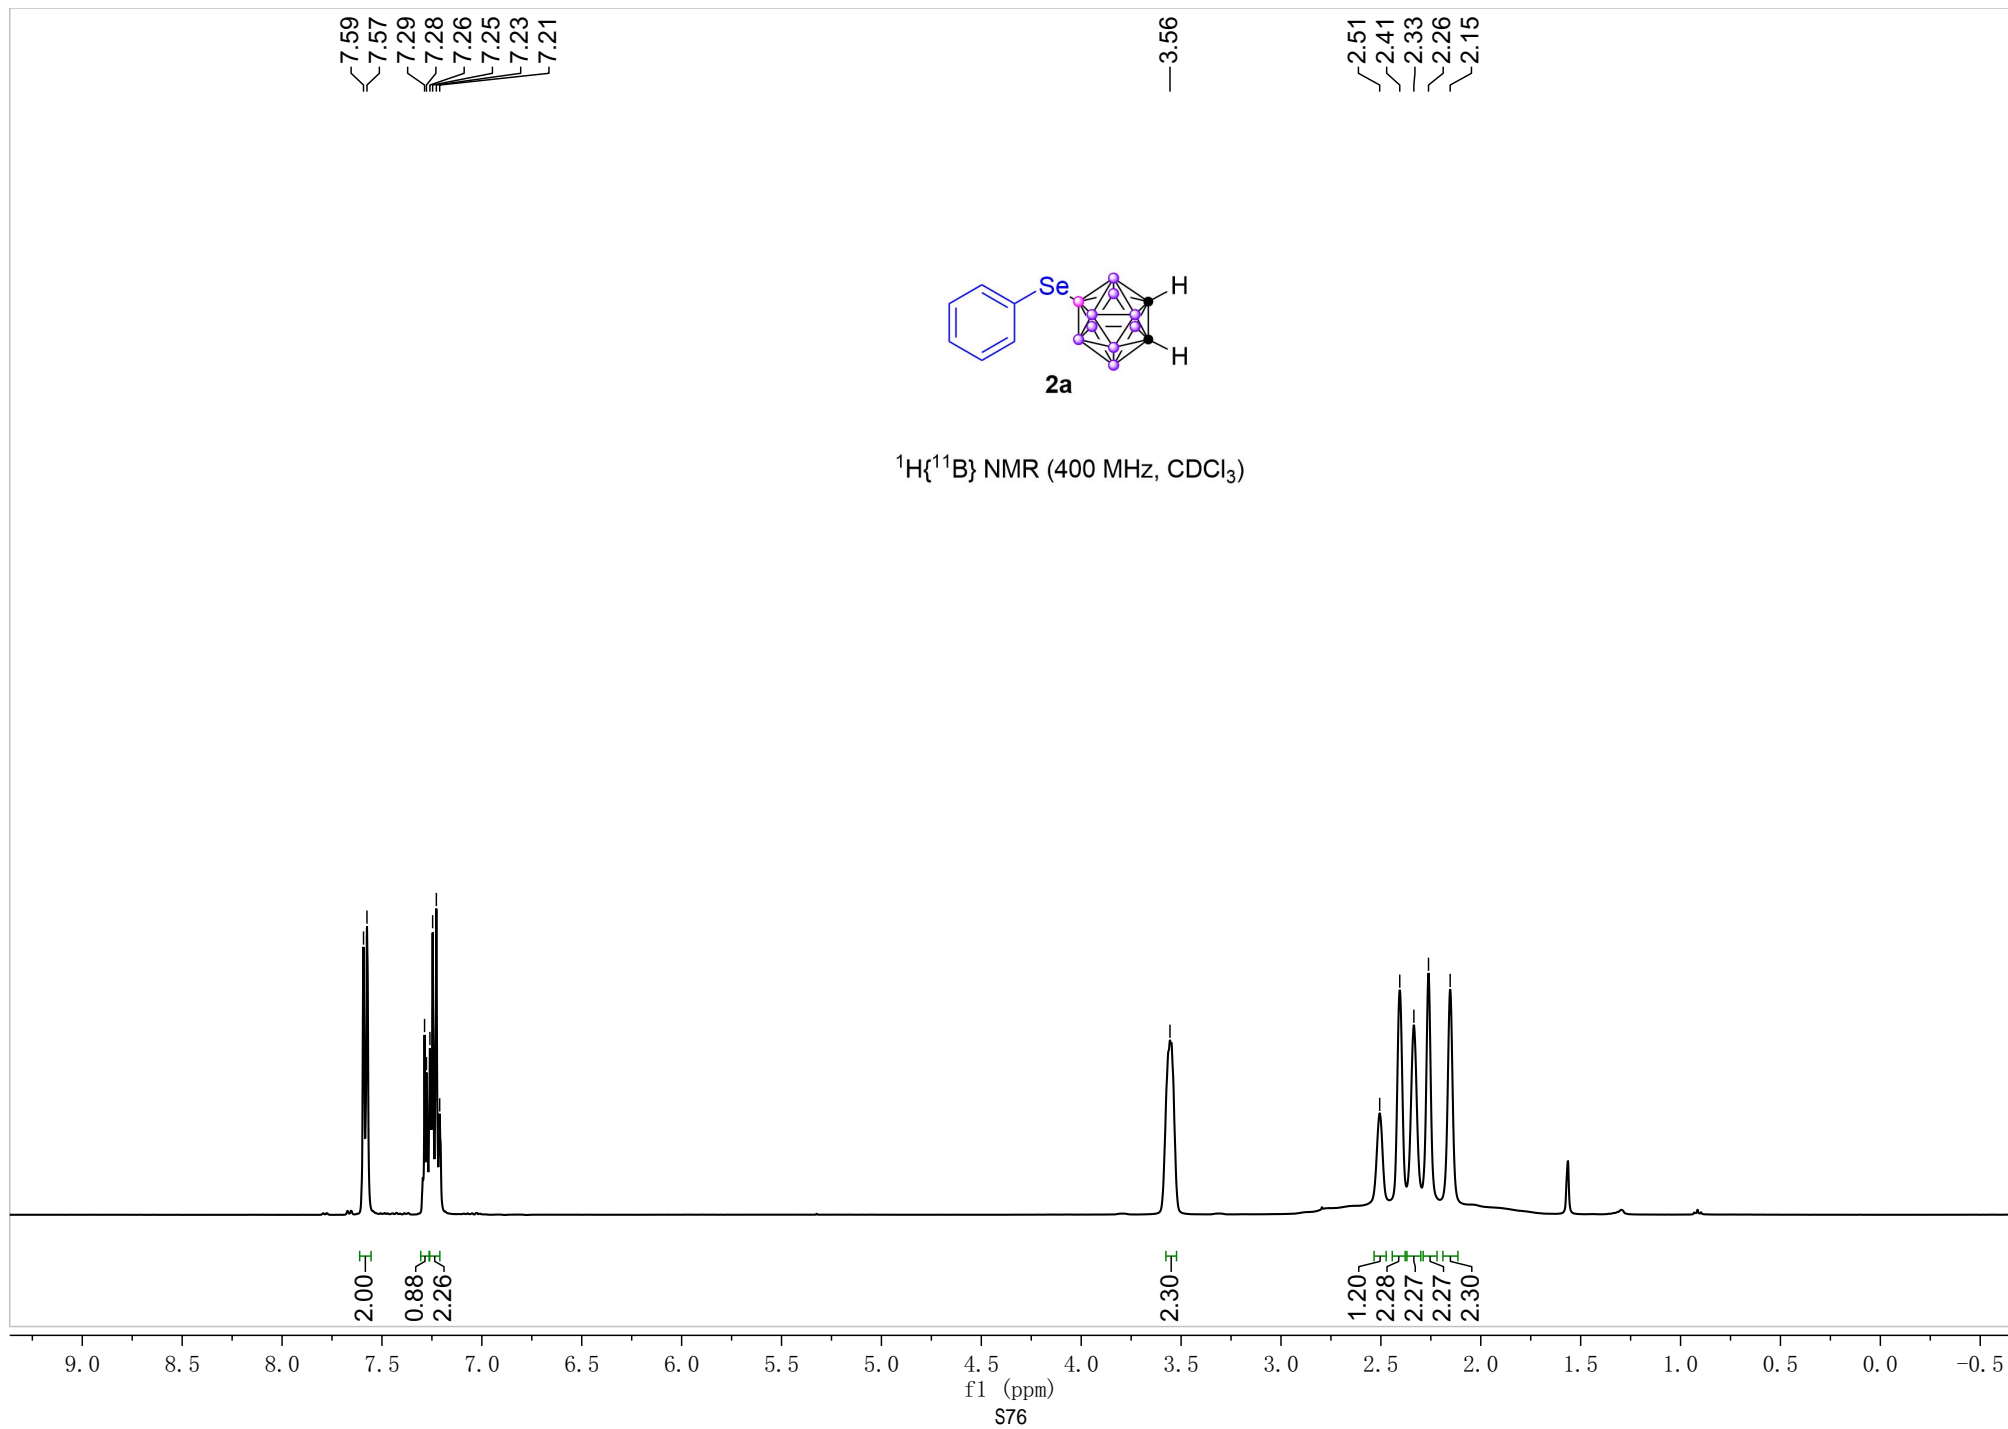

—3.06  
—1.33  
—2.51  
—7.78  
—8.98  
—13.30  
—14.46  
—15.81

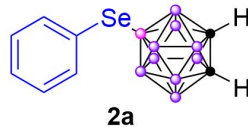

$^{11}\text{B}$  NMR (128 MHz,  $\text{CDCl}_3$ )

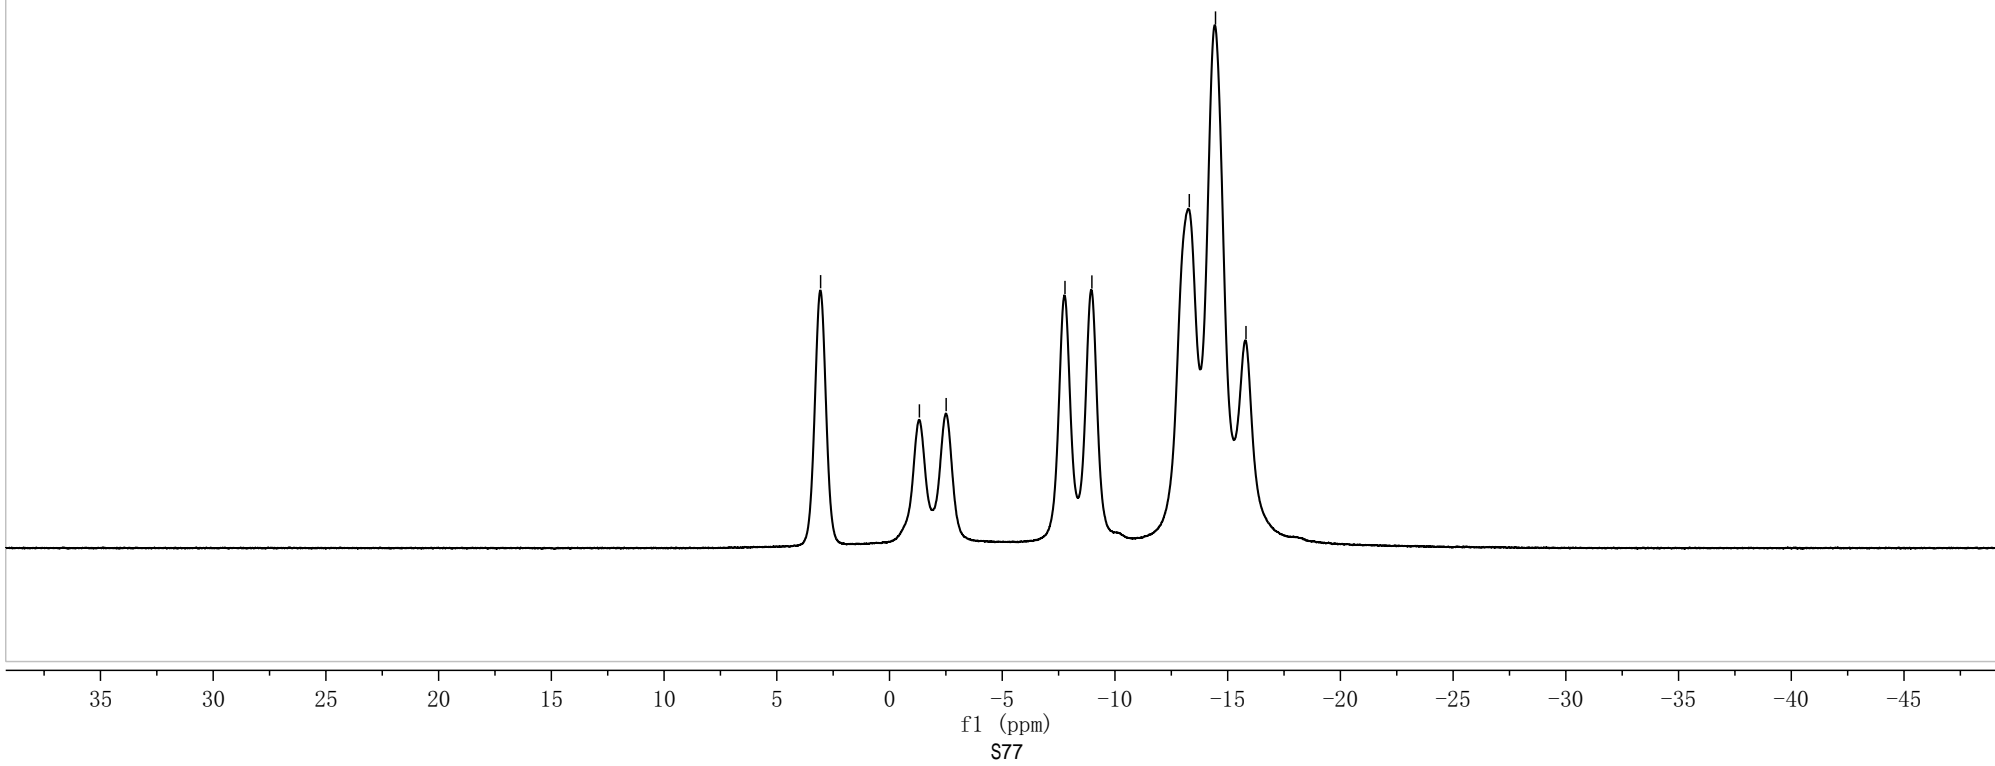

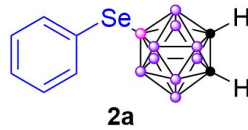

$^{11}\text{B}\{^1\text{H}\}$  NMR (128 MHz,  $\text{CDCl}_3$ )

—3.03  
—1.95  
—8.42  
—14.00  
—15.14

1.00  
1.08  
1.80  
3.60  
1.58

f1 (ppm)  
S78

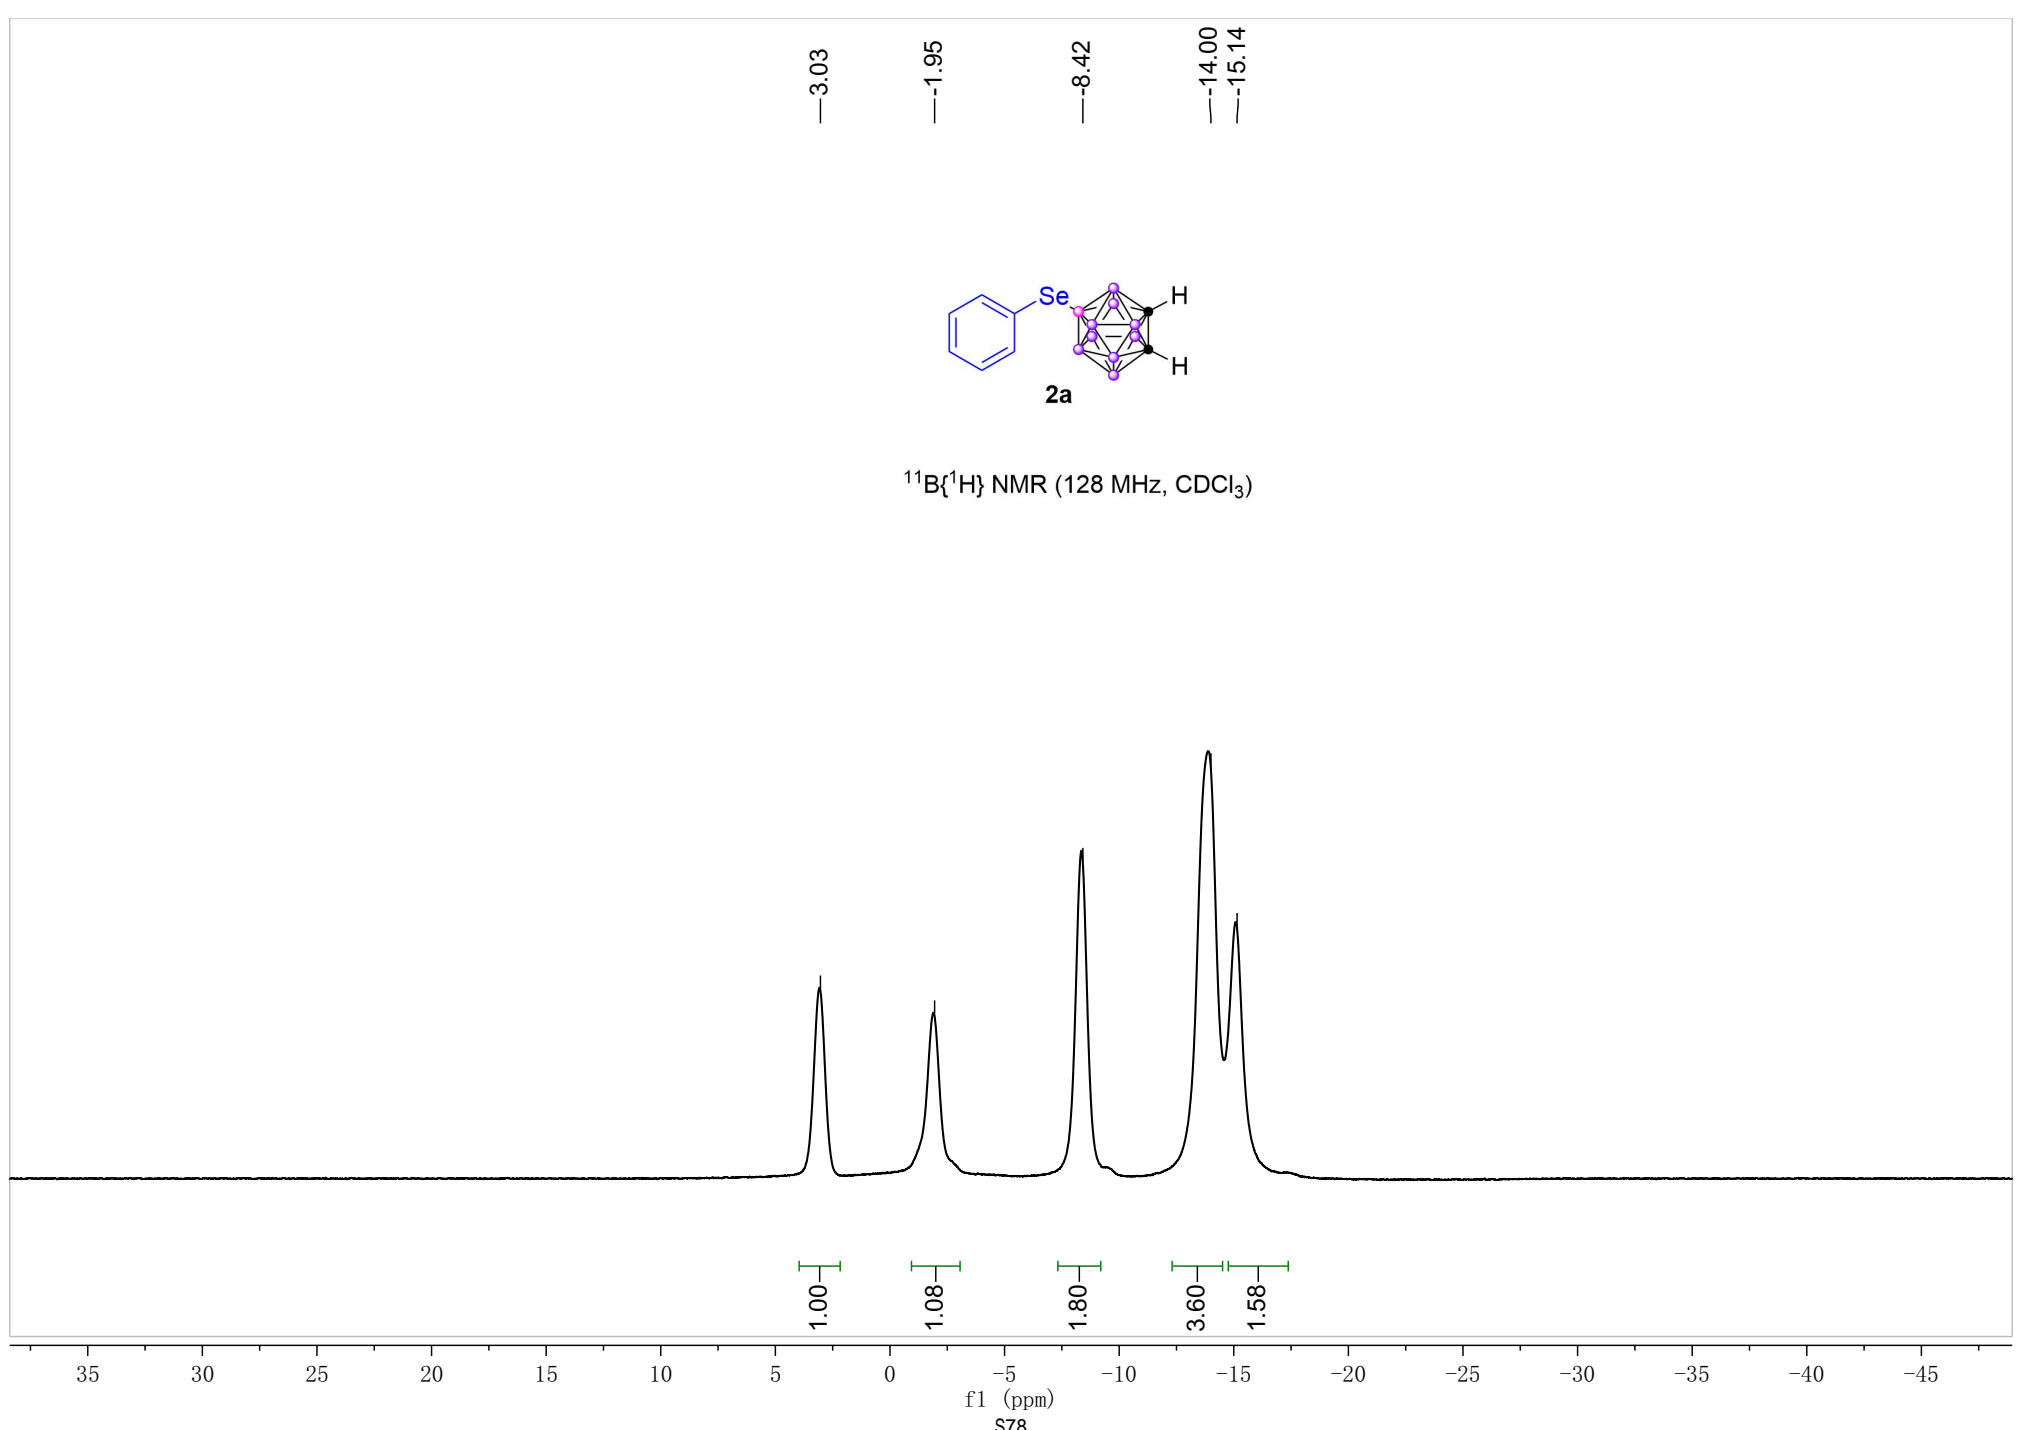





$^{13}\text{C}$  NMR (101 MHz,  $\text{CDCl}_3$ )

—136.22  
—129.06  
—128.57  
—127.00

—77.32  
—77.00  
—76.68

—53.74  
—49.41

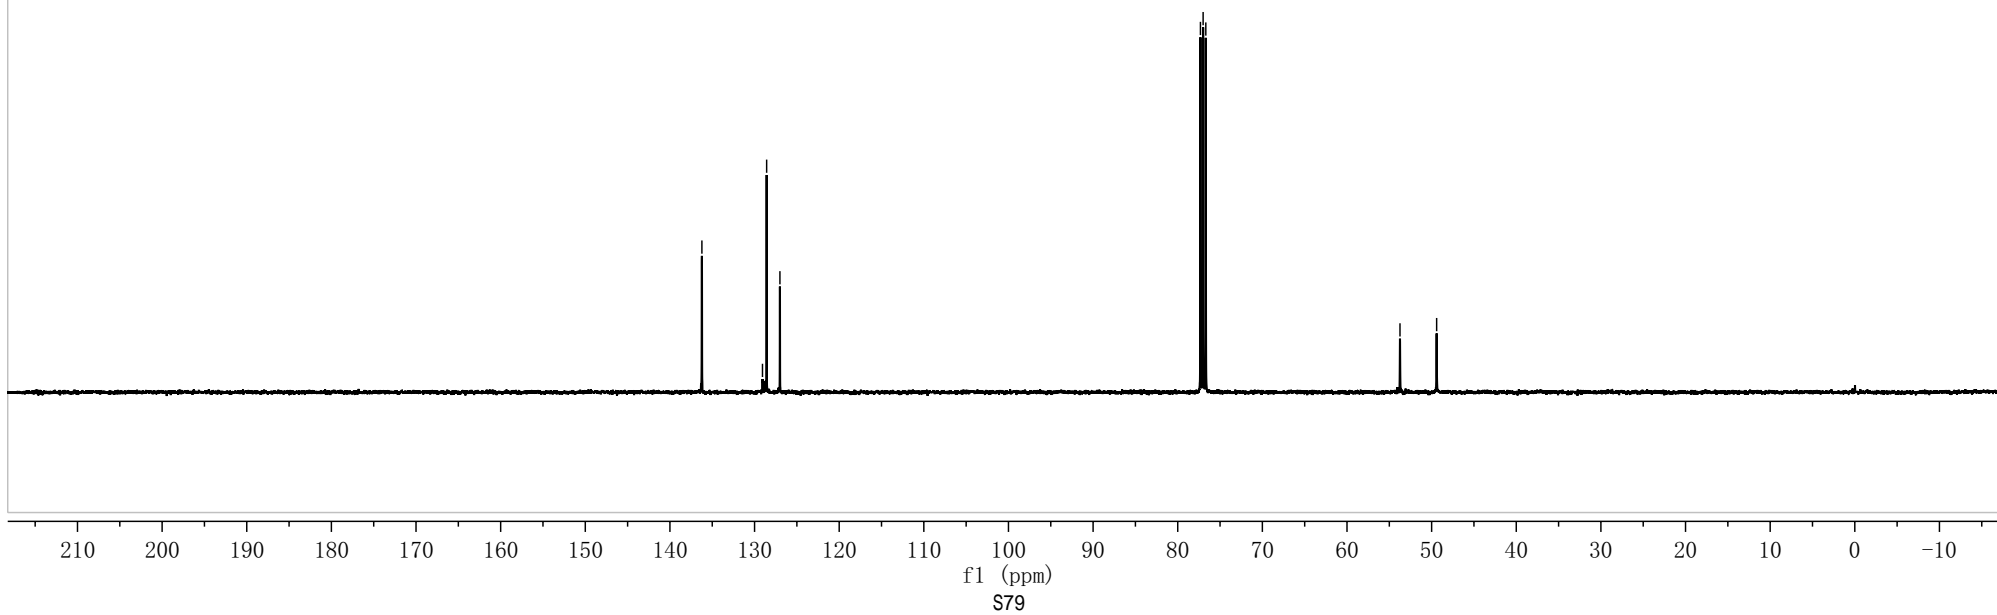

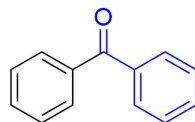

**3a**

<sup>1</sup>H NMR (400 MHz, CD<sub>3</sub>CN)

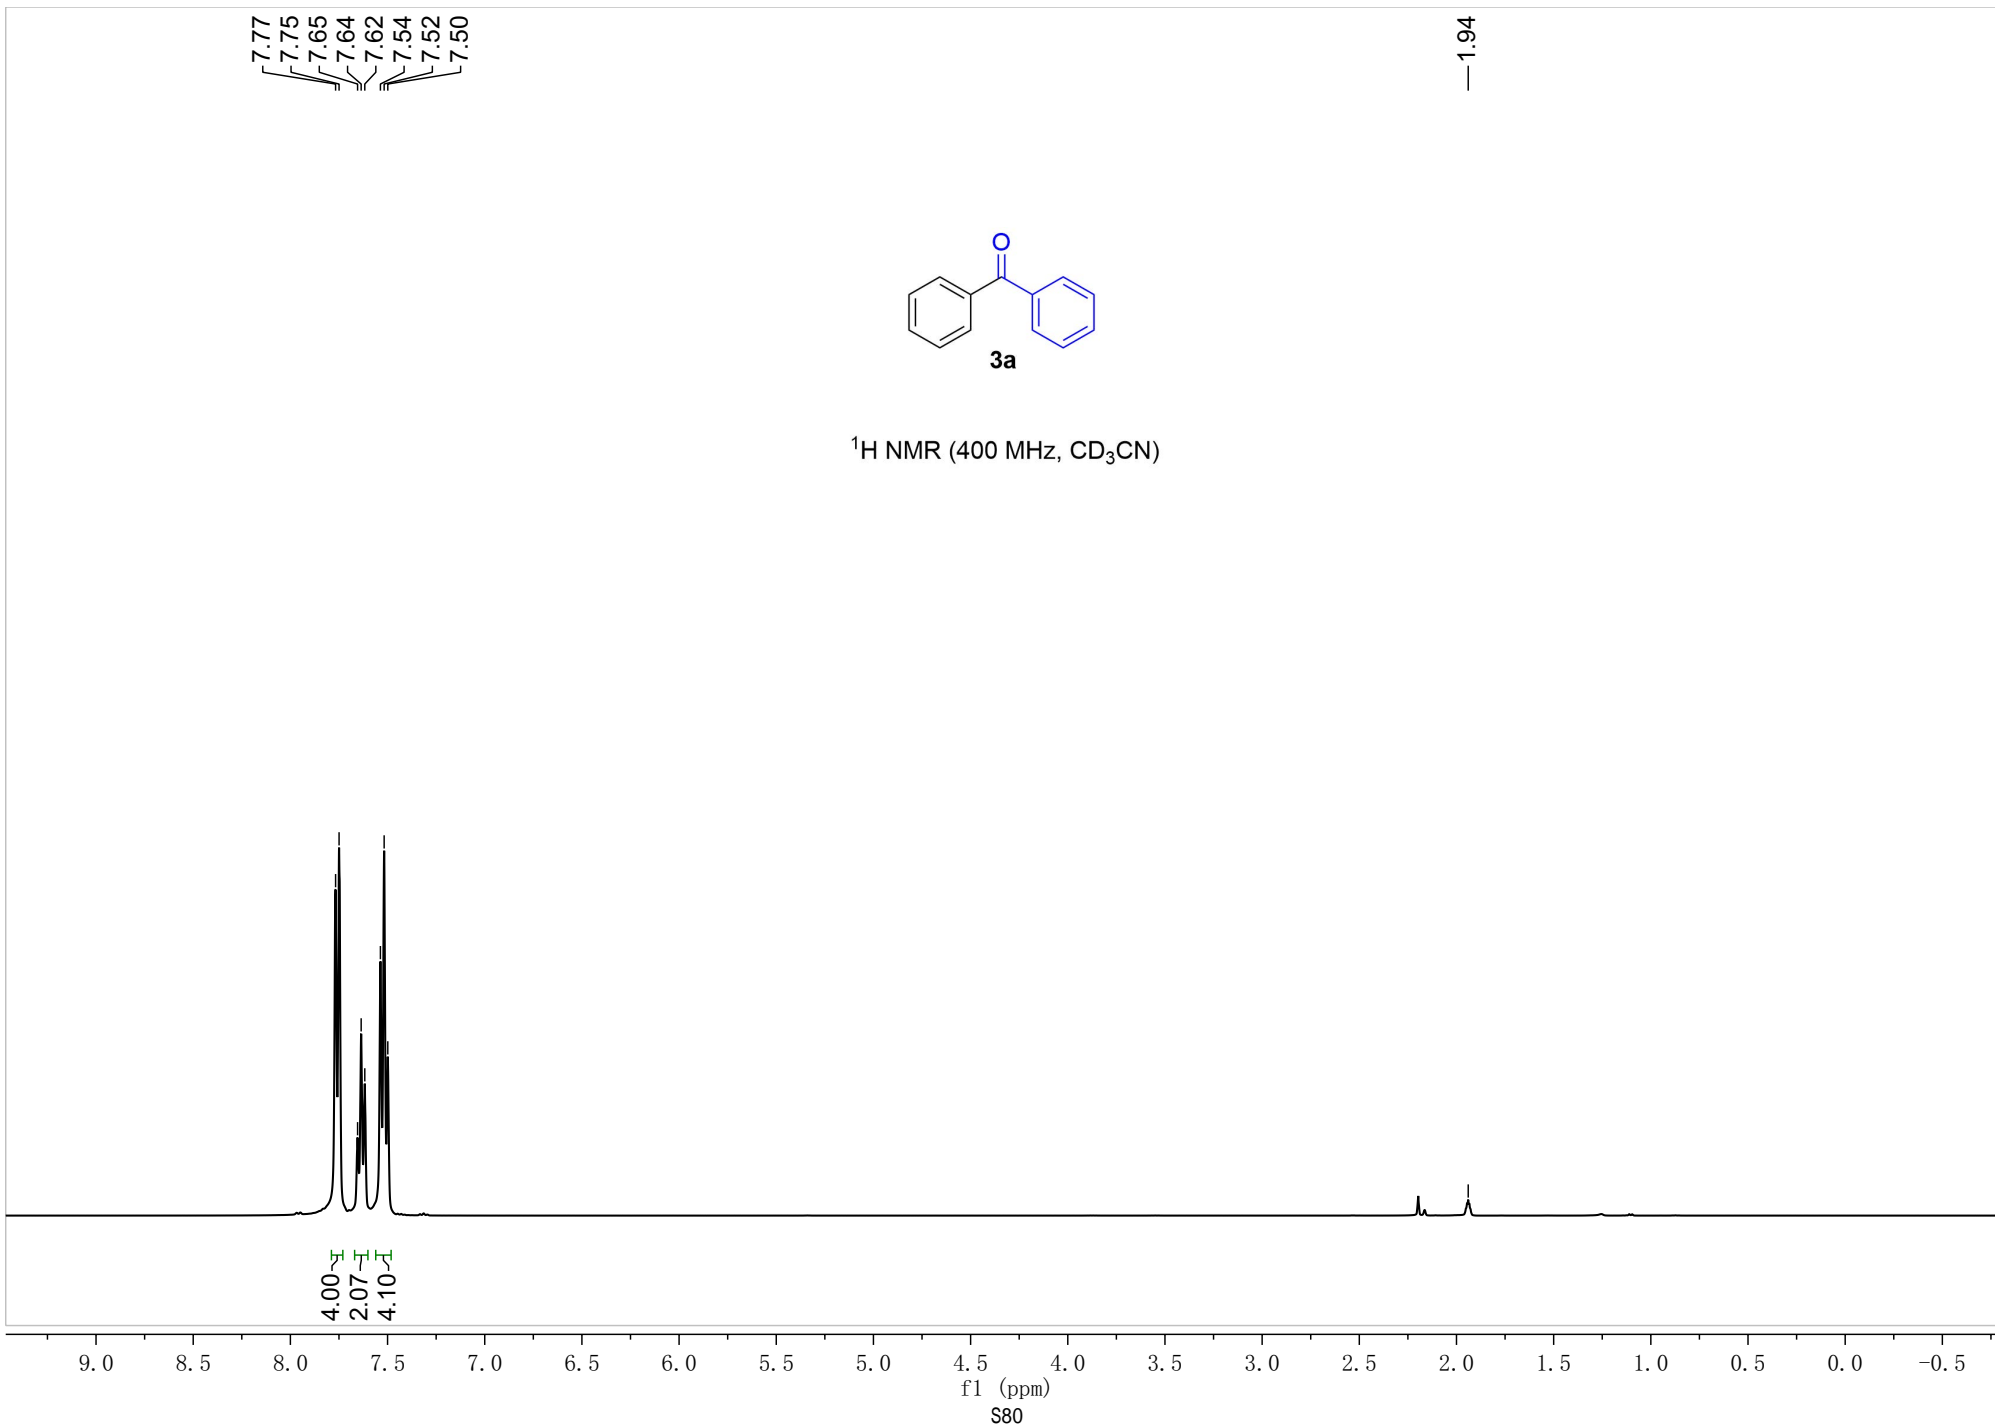

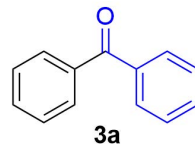

<sup>13</sup>C NMR (101 MHz, CD<sub>3</sub>CN)

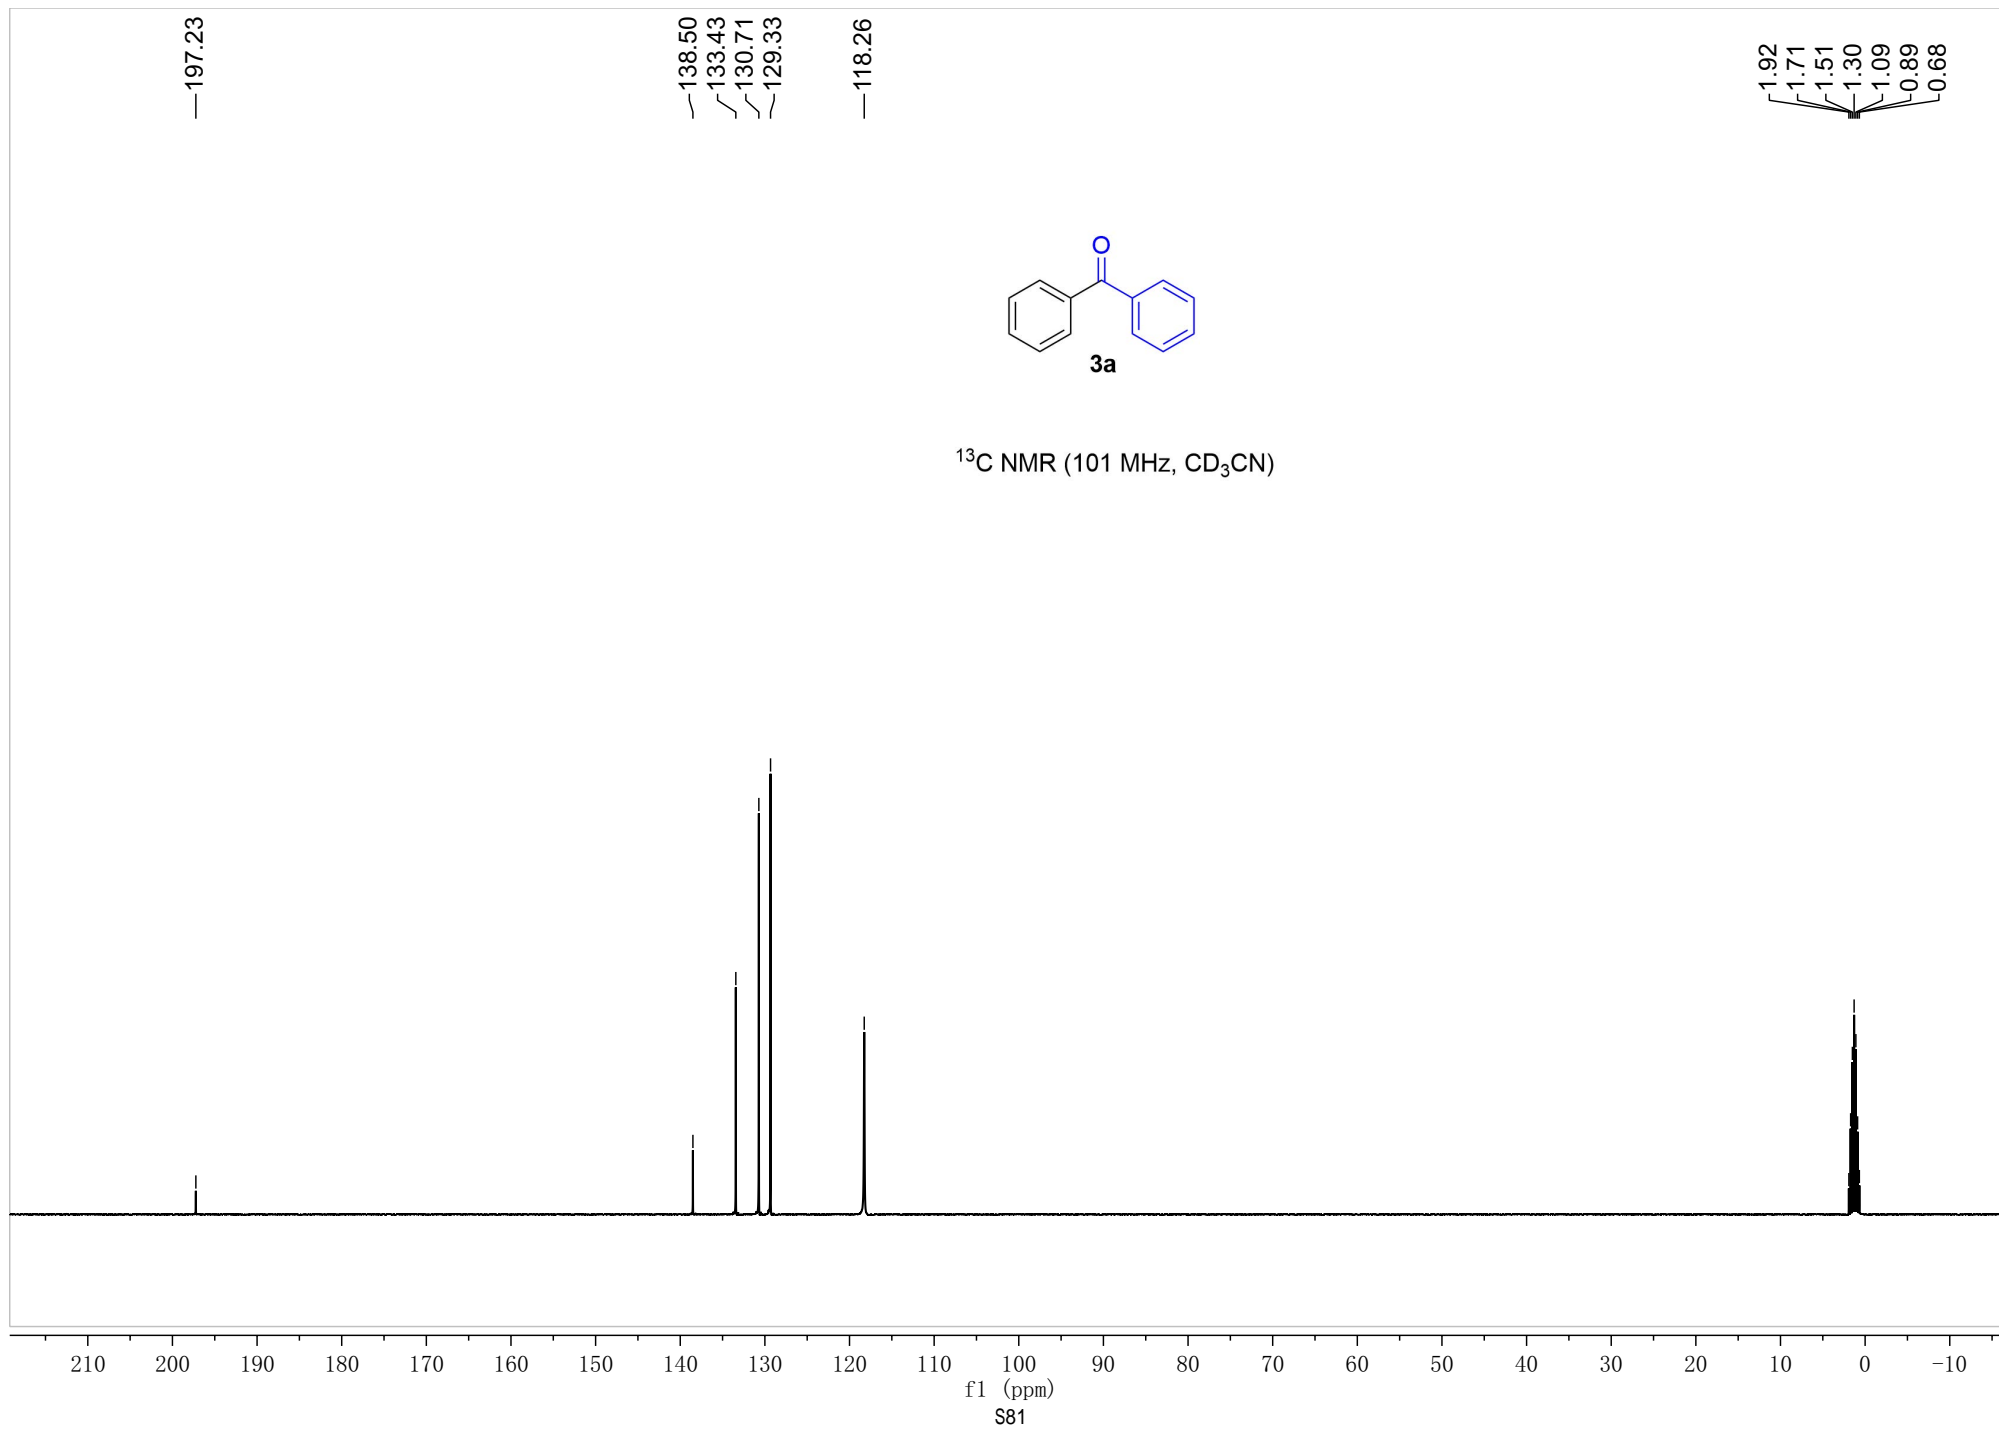

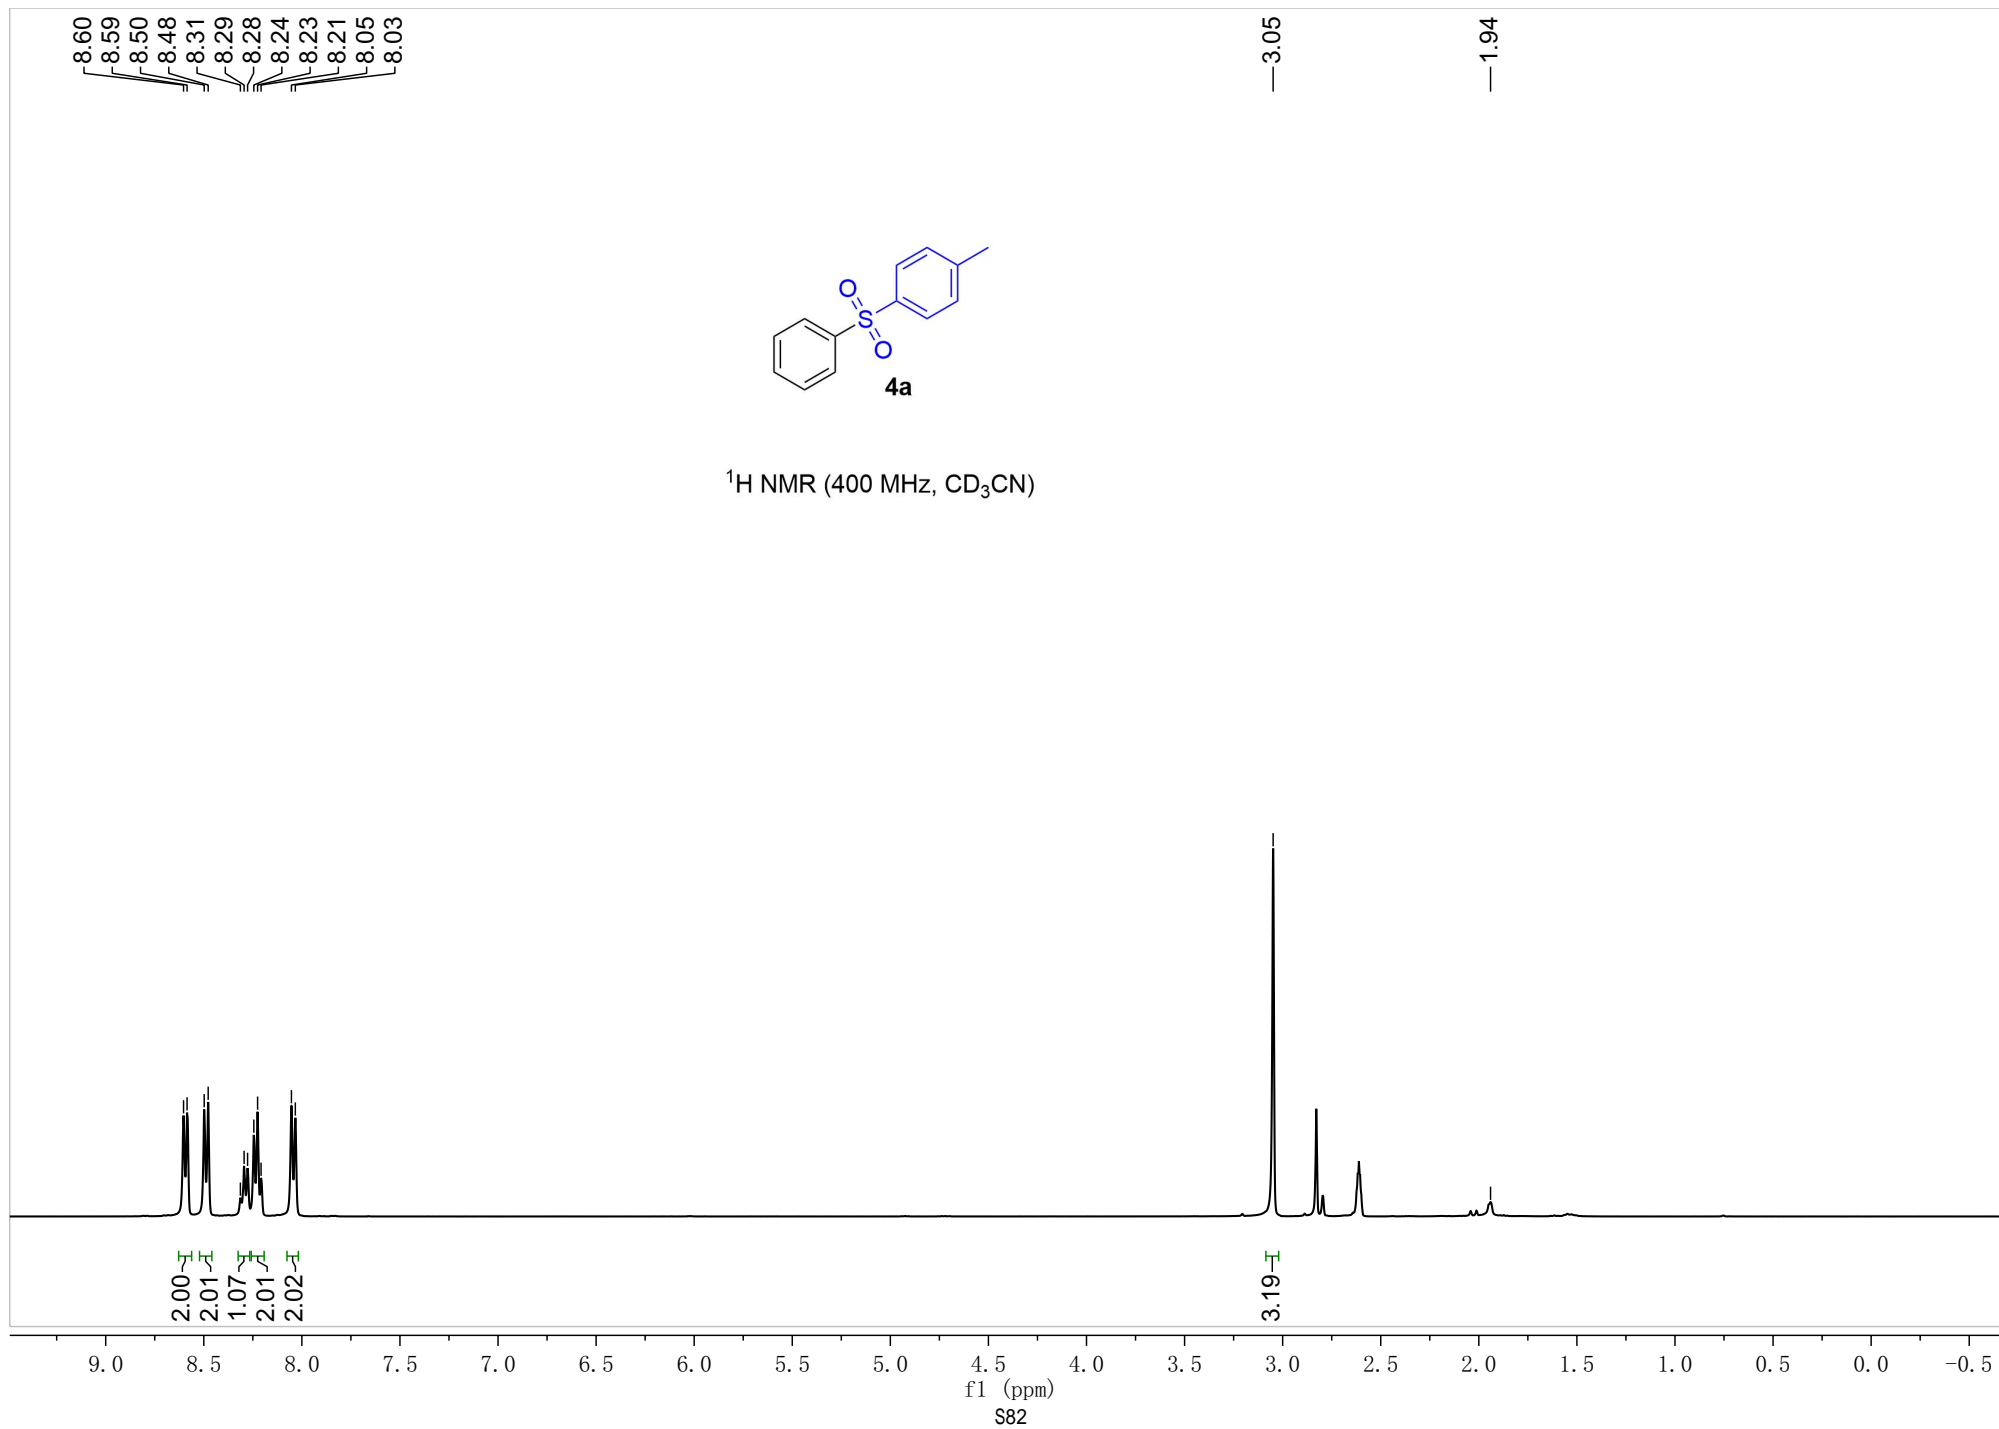

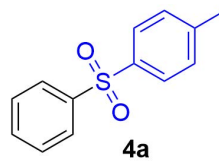

<sup>13</sup>C NMR (101 MHz, CD<sub>3</sub>CN)

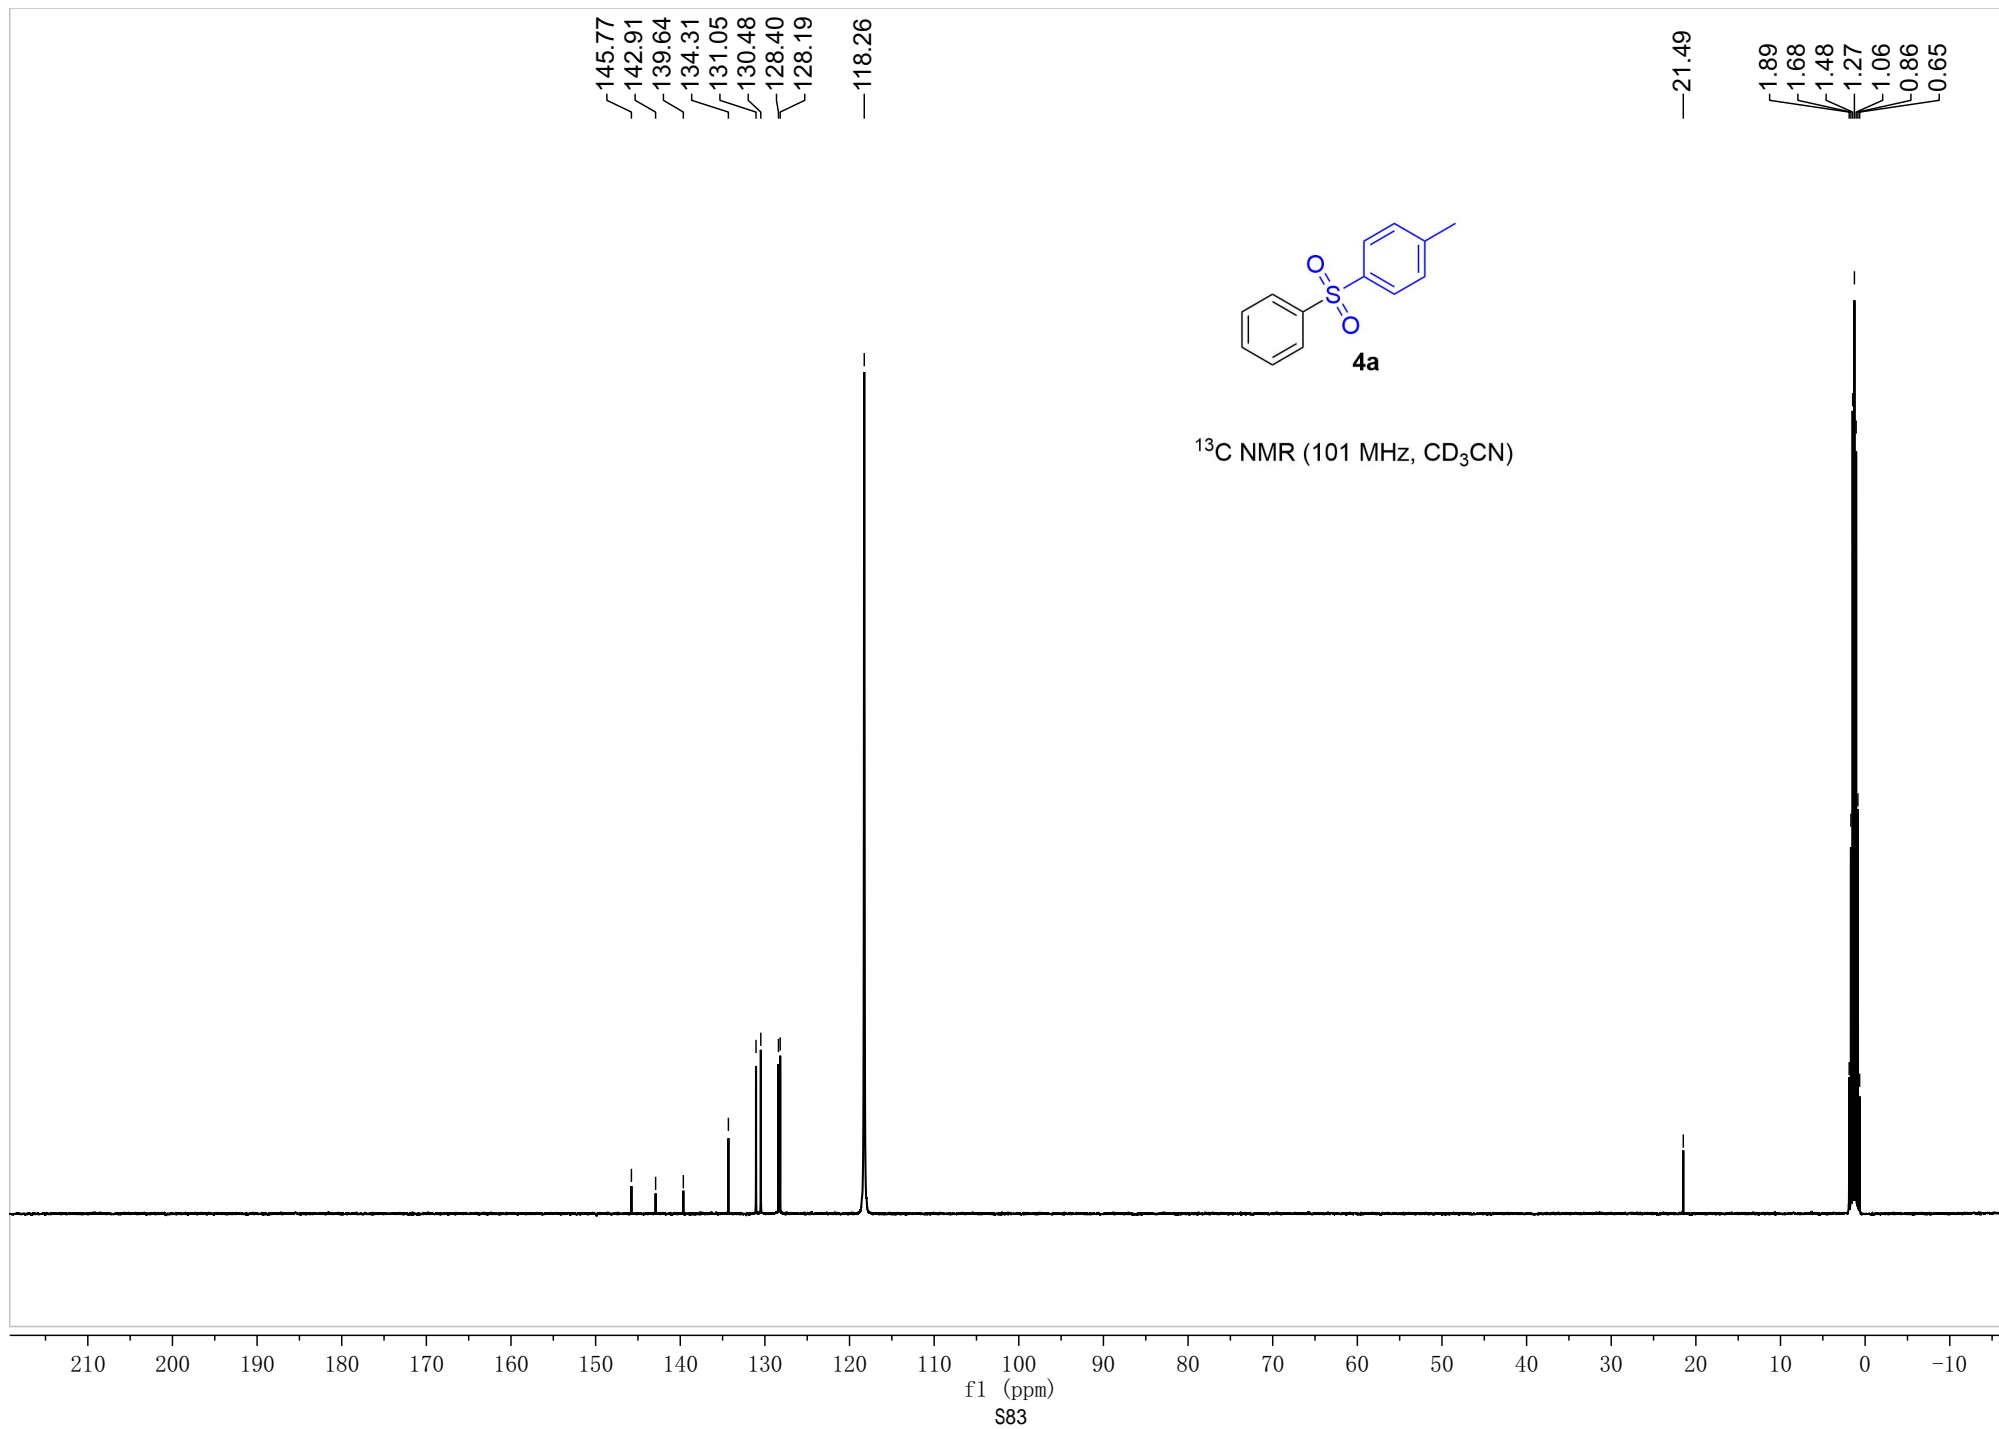

—7.26

—3.54

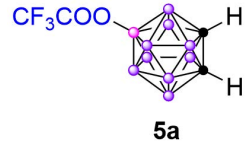

<sup>1</sup>H NMR (400 MHz, CDCl<sub>3</sub>)

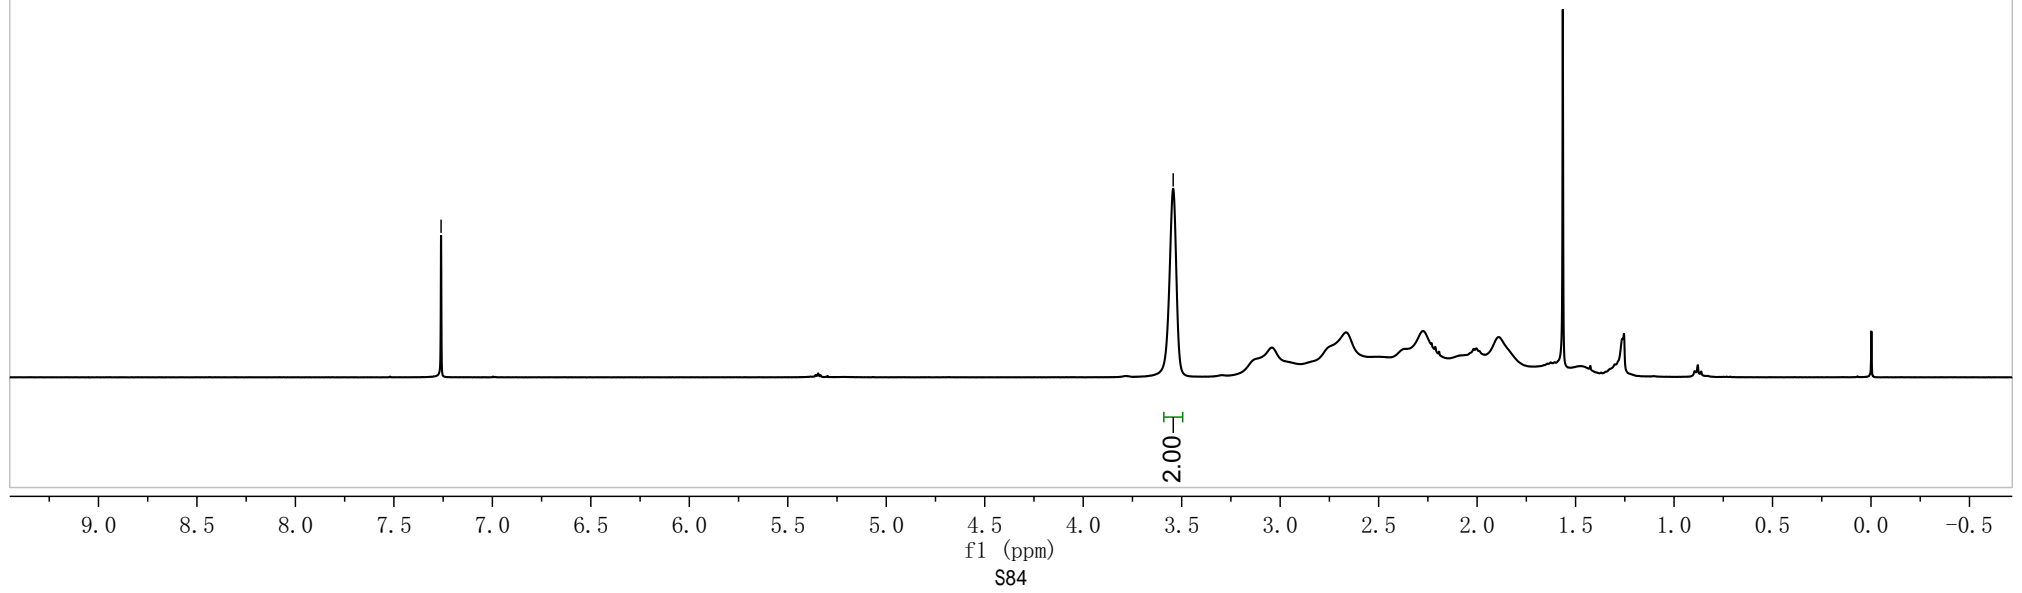

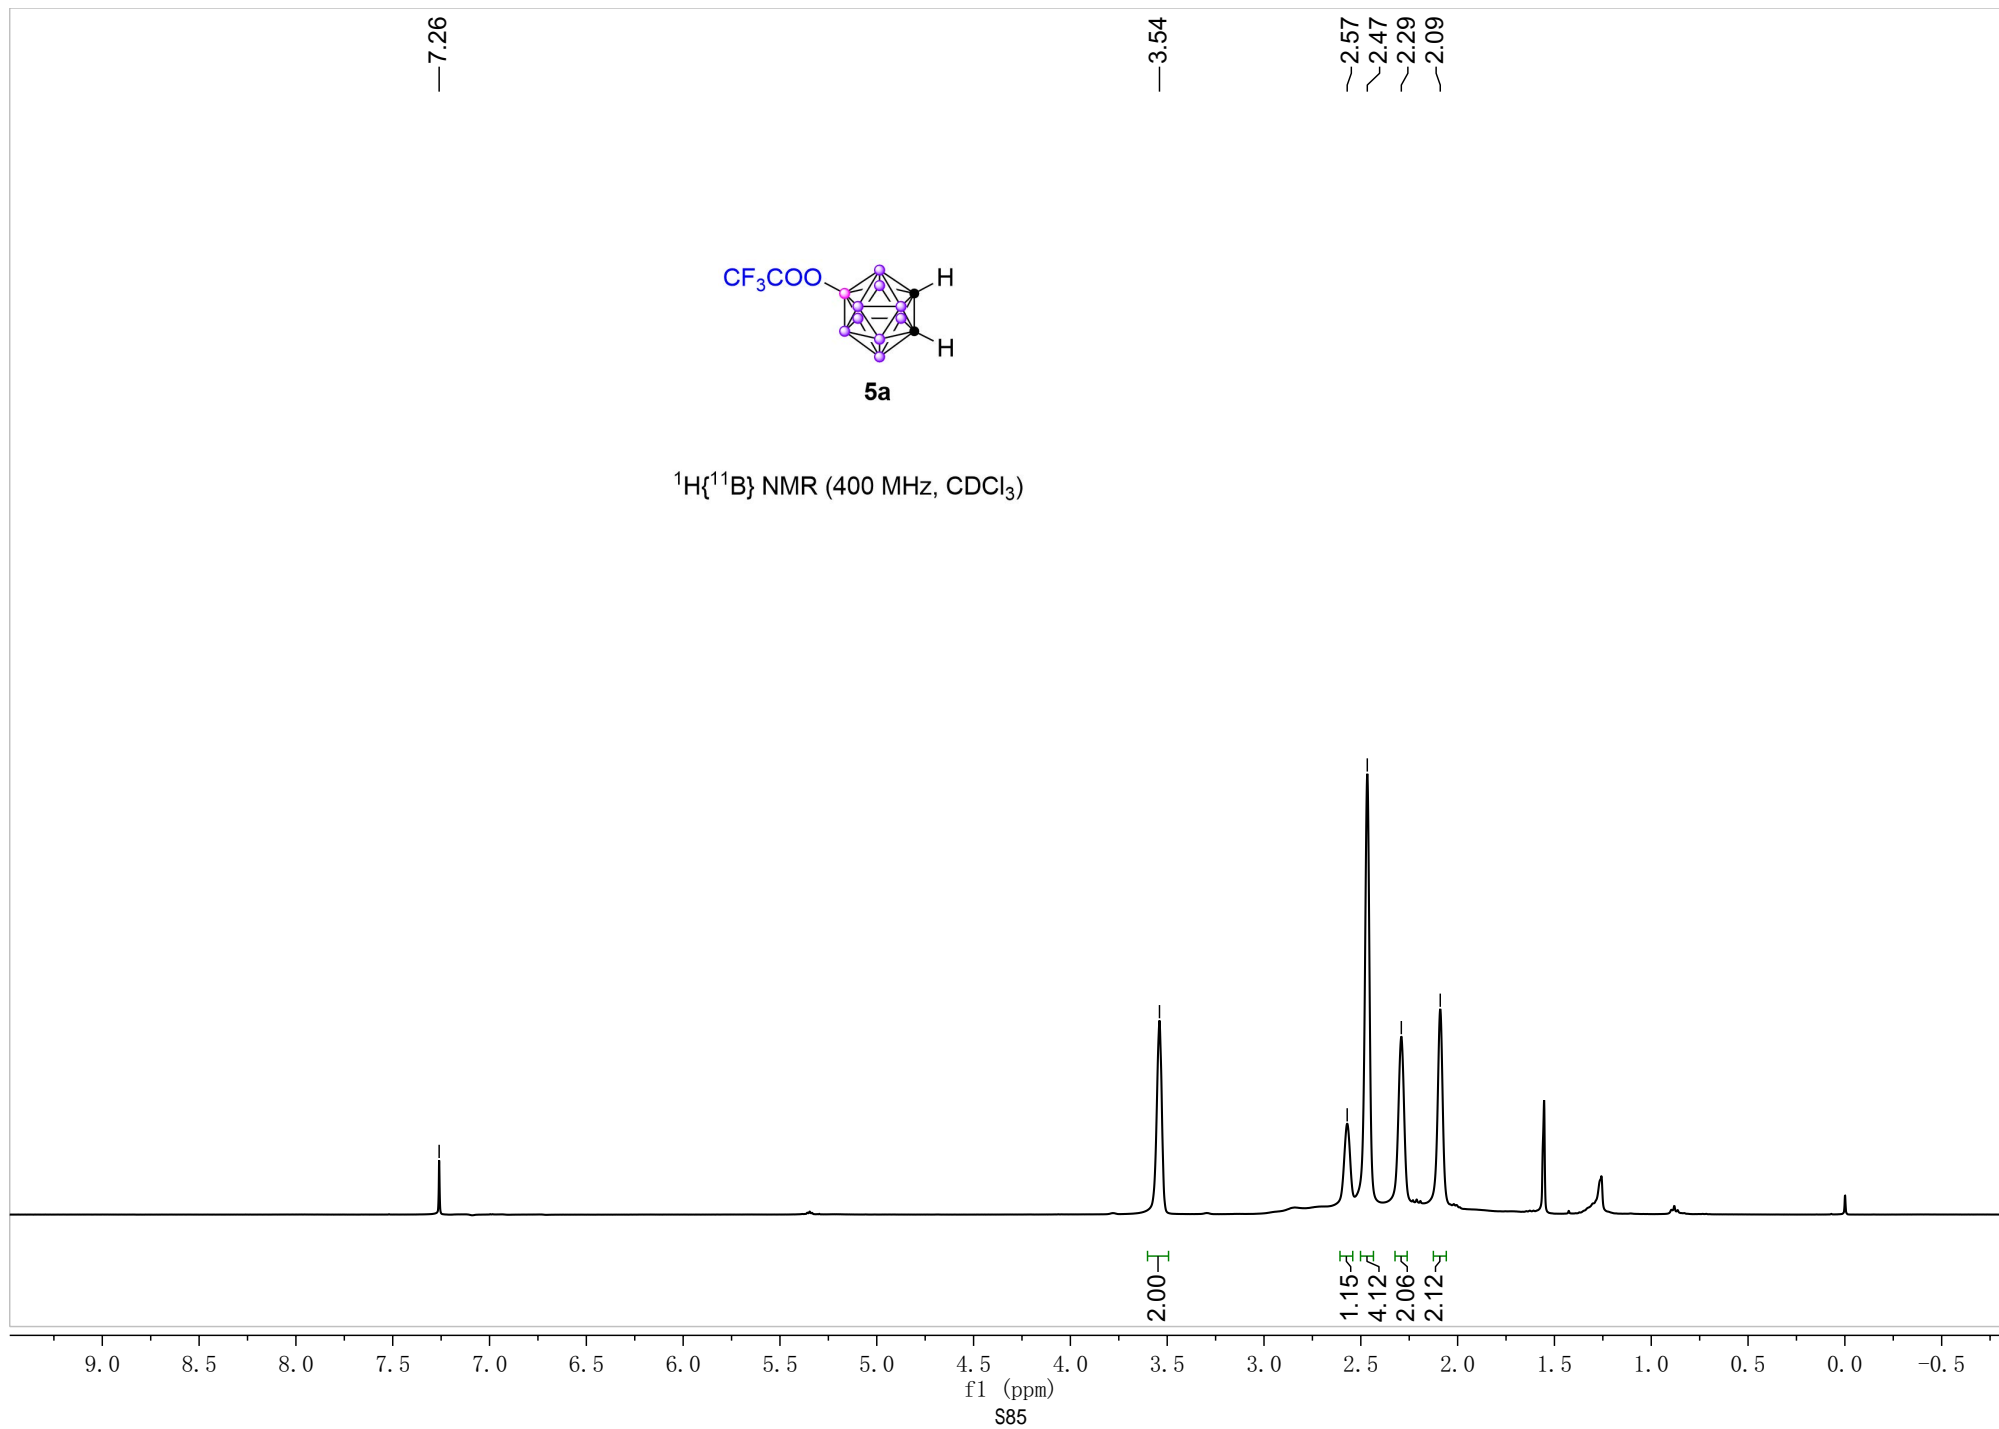

—9.99  
—2.86  
—4.06  
—9.75  
—10.94  
—14.37  
—15.55  
—16.63  
—17.86

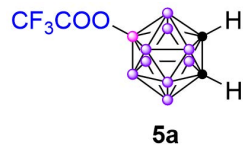

<sup>11</sup>B NMR (128 MHz, CDCl<sub>3</sub>)

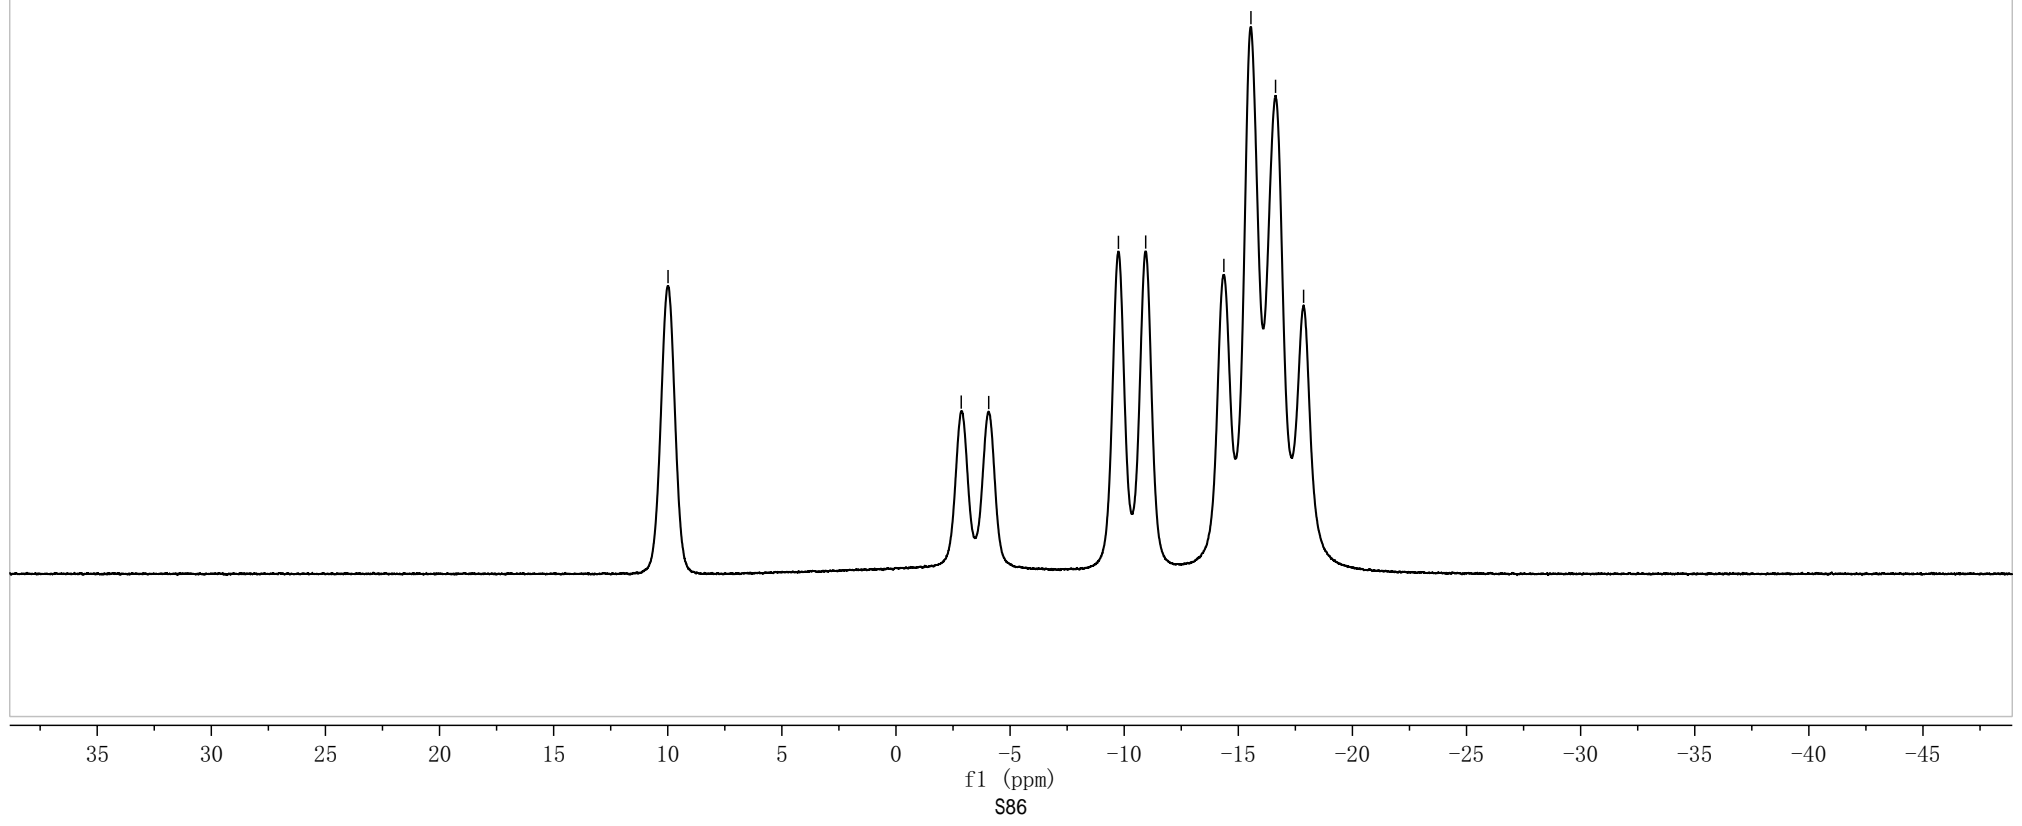



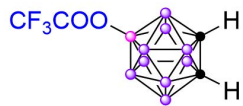

**5a**

<sup>11</sup>B{<sup>1</sup>H} NMR (128 MHz, CDCl<sub>3</sub>)

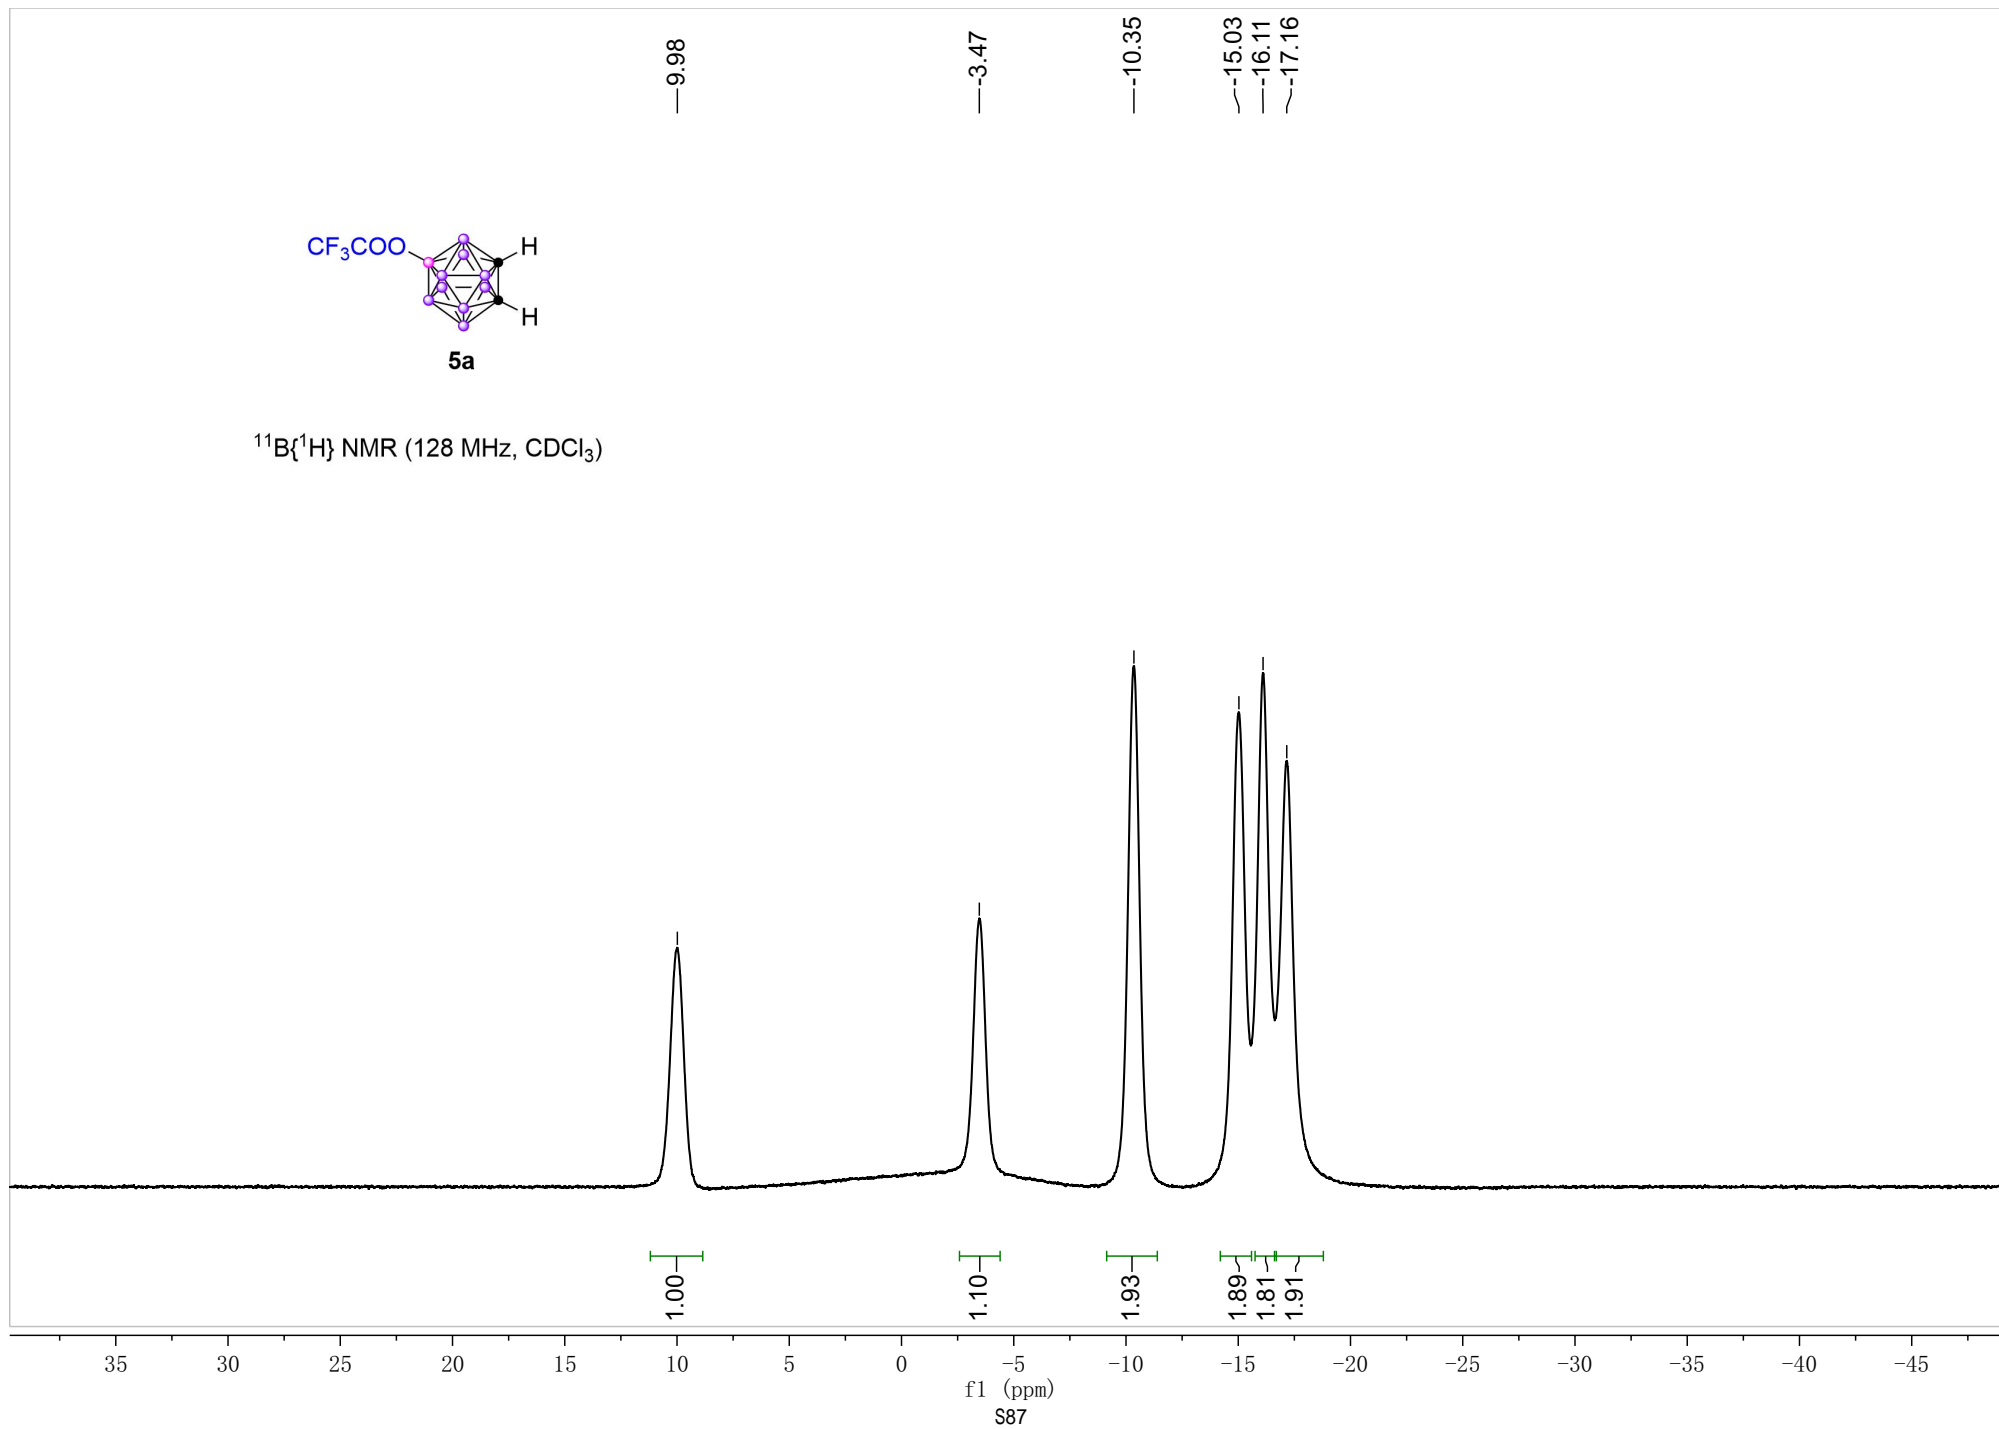

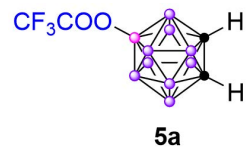

$^{19}\text{F}$  NMR (377 MHz,  $\text{CDCl}_3$ )

---75.88

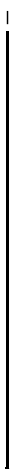

10 0 -10 -20 -30 -40 -50 -60 -70 -80 -90 -100 -110 -120 -130 -140 -150 -160 -170 -180 -190 -200 -210

f1 (ppm)  
S88

156.41  
155.99  
155.58  
155.16

118.80  
115.92  
113.08  
110.31

77.32  
77.00  
76.68

50.48  
44.28

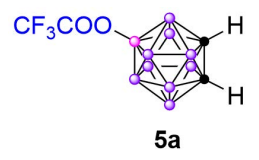

<sup>13</sup>C NMR (101 MHz, CDCl<sub>3</sub>)

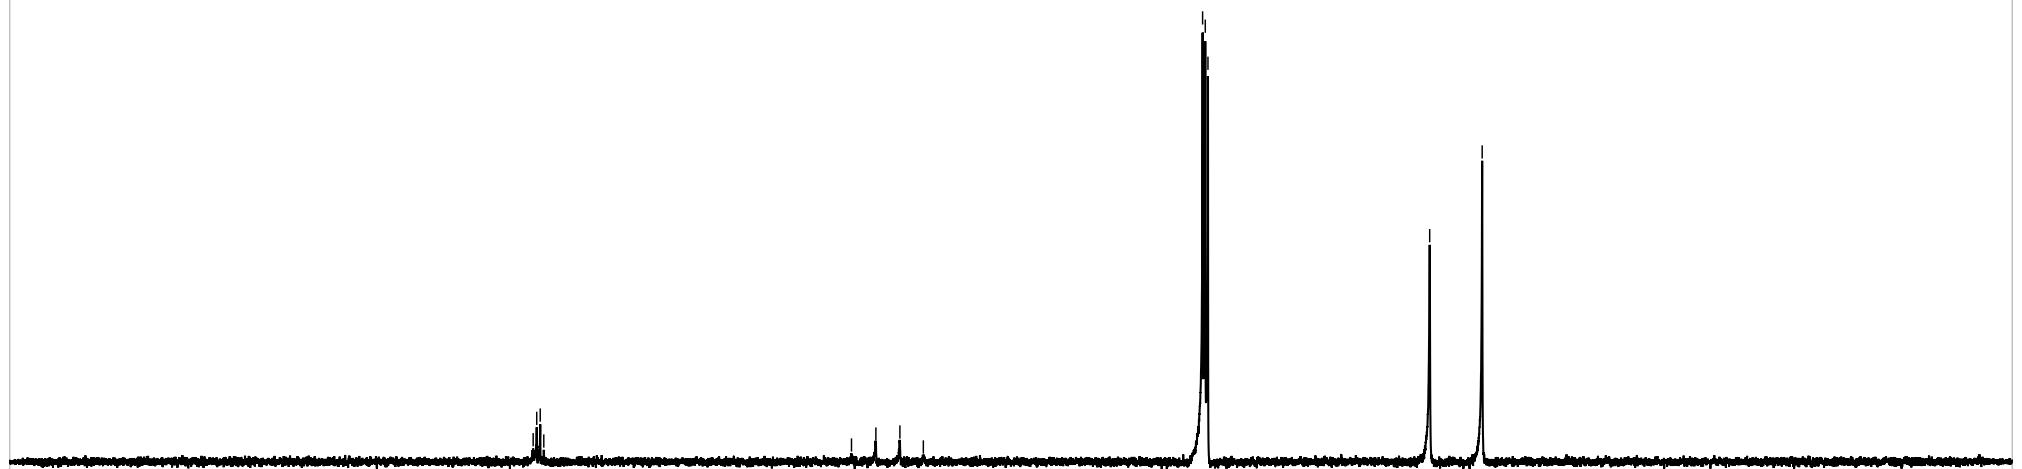

210 200 190 180 170 160 150 140 130 120 110 100 90 80 70 60 50 40 30 20 10 0 -10

f1 (ppm)  
S89

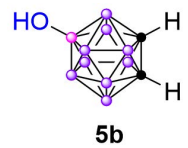

<sup>1</sup>H NMR (400 MHz, CDCl<sub>3</sub>)

—7.26

—3.38  
—3.26

—1.84

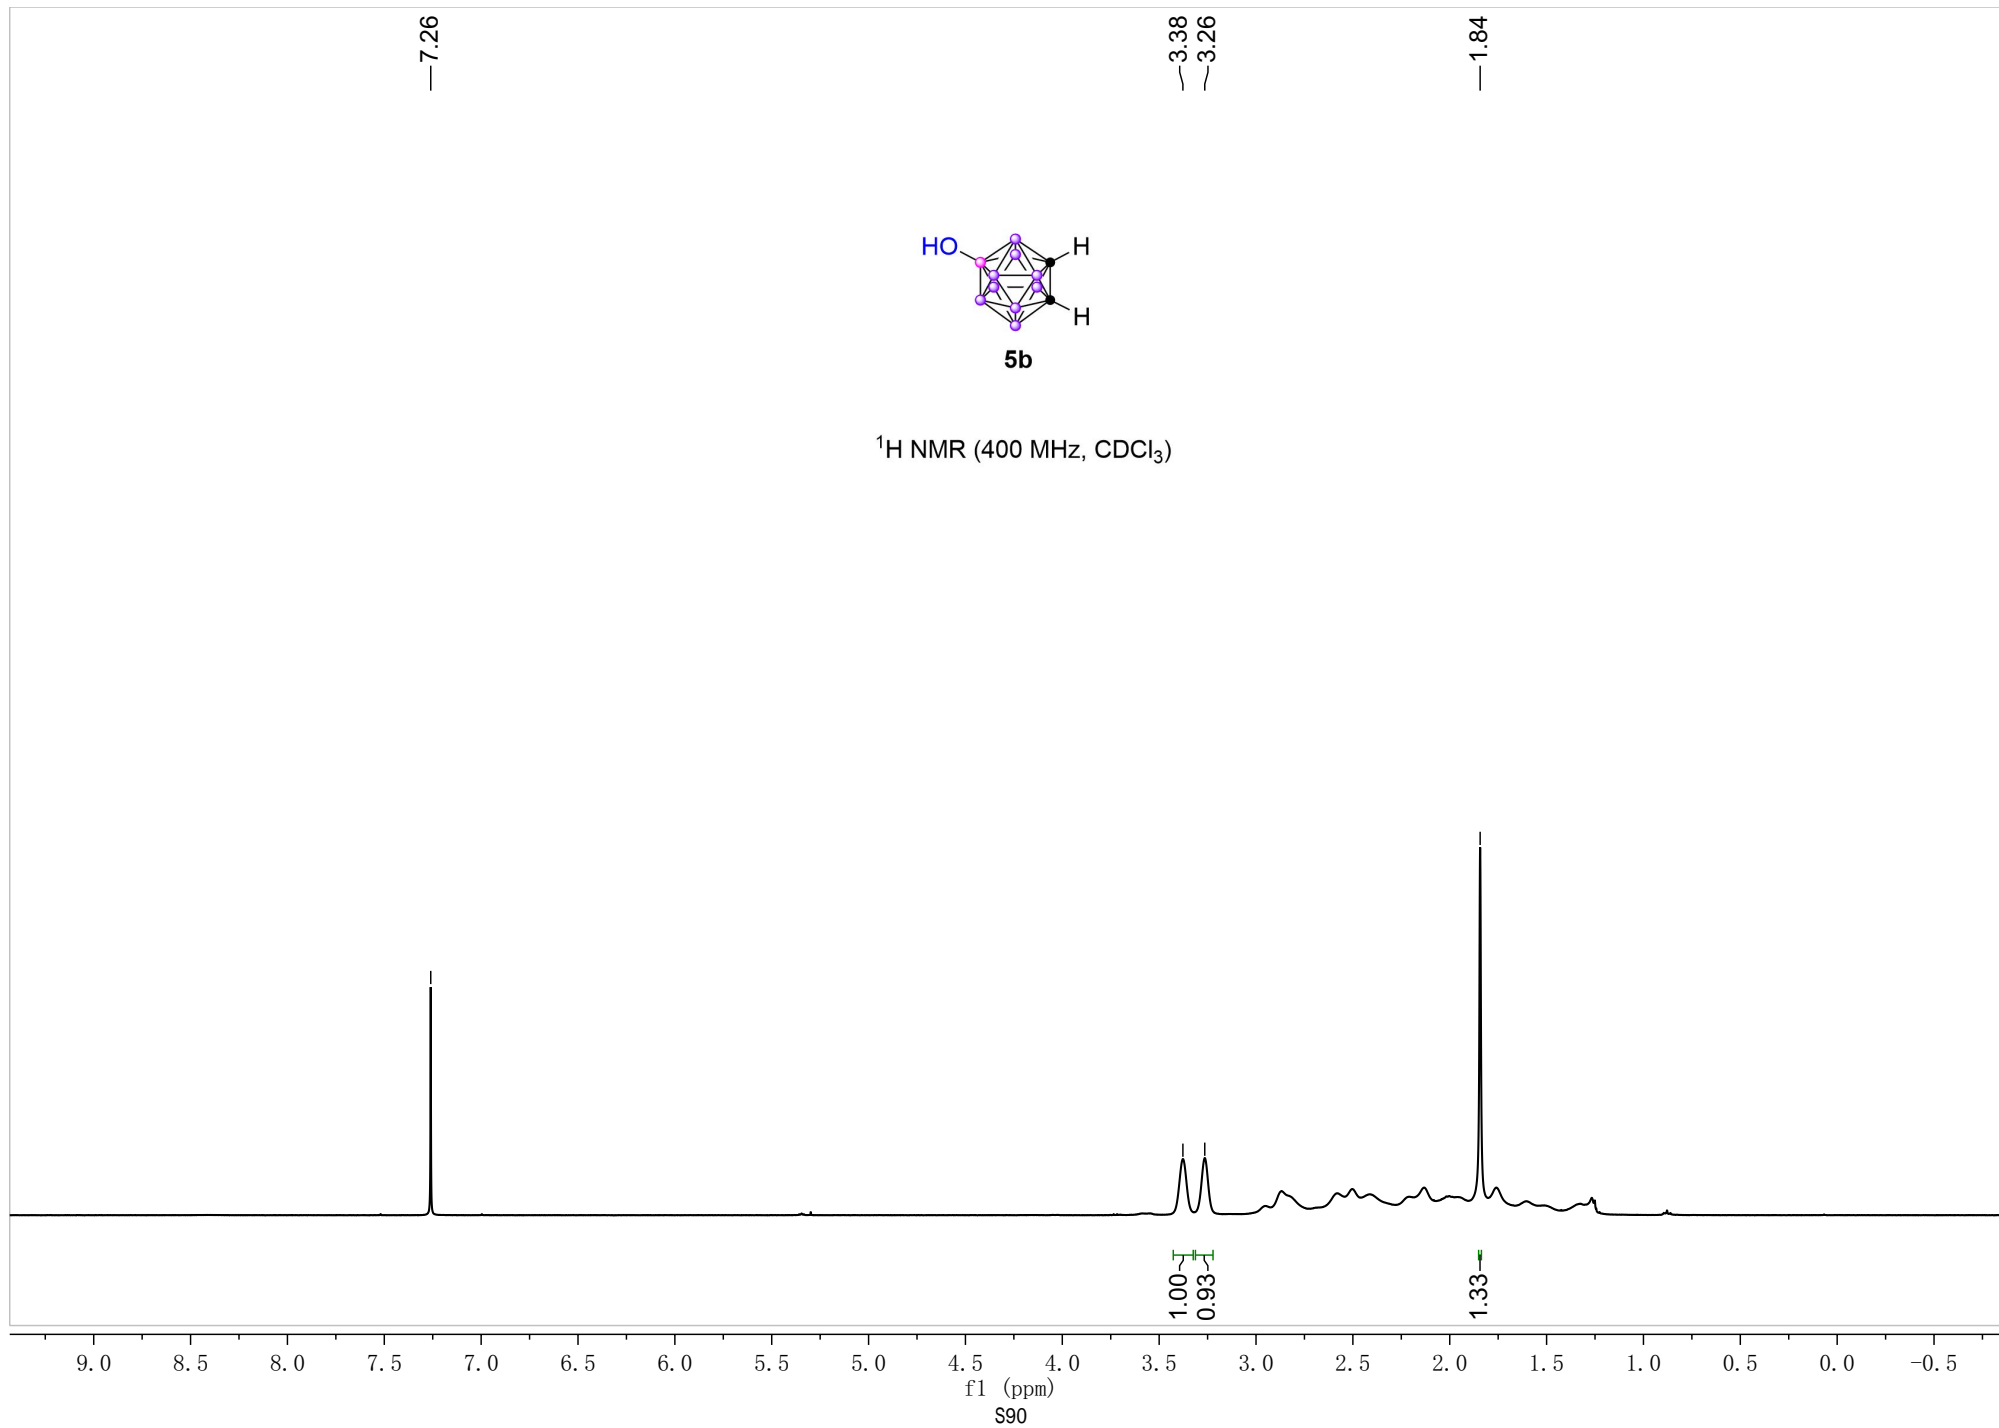



$^1\text{H}\{^{11}\text{B}\}$  NMR (400 MHz,  $\text{CDCl}_3$ )

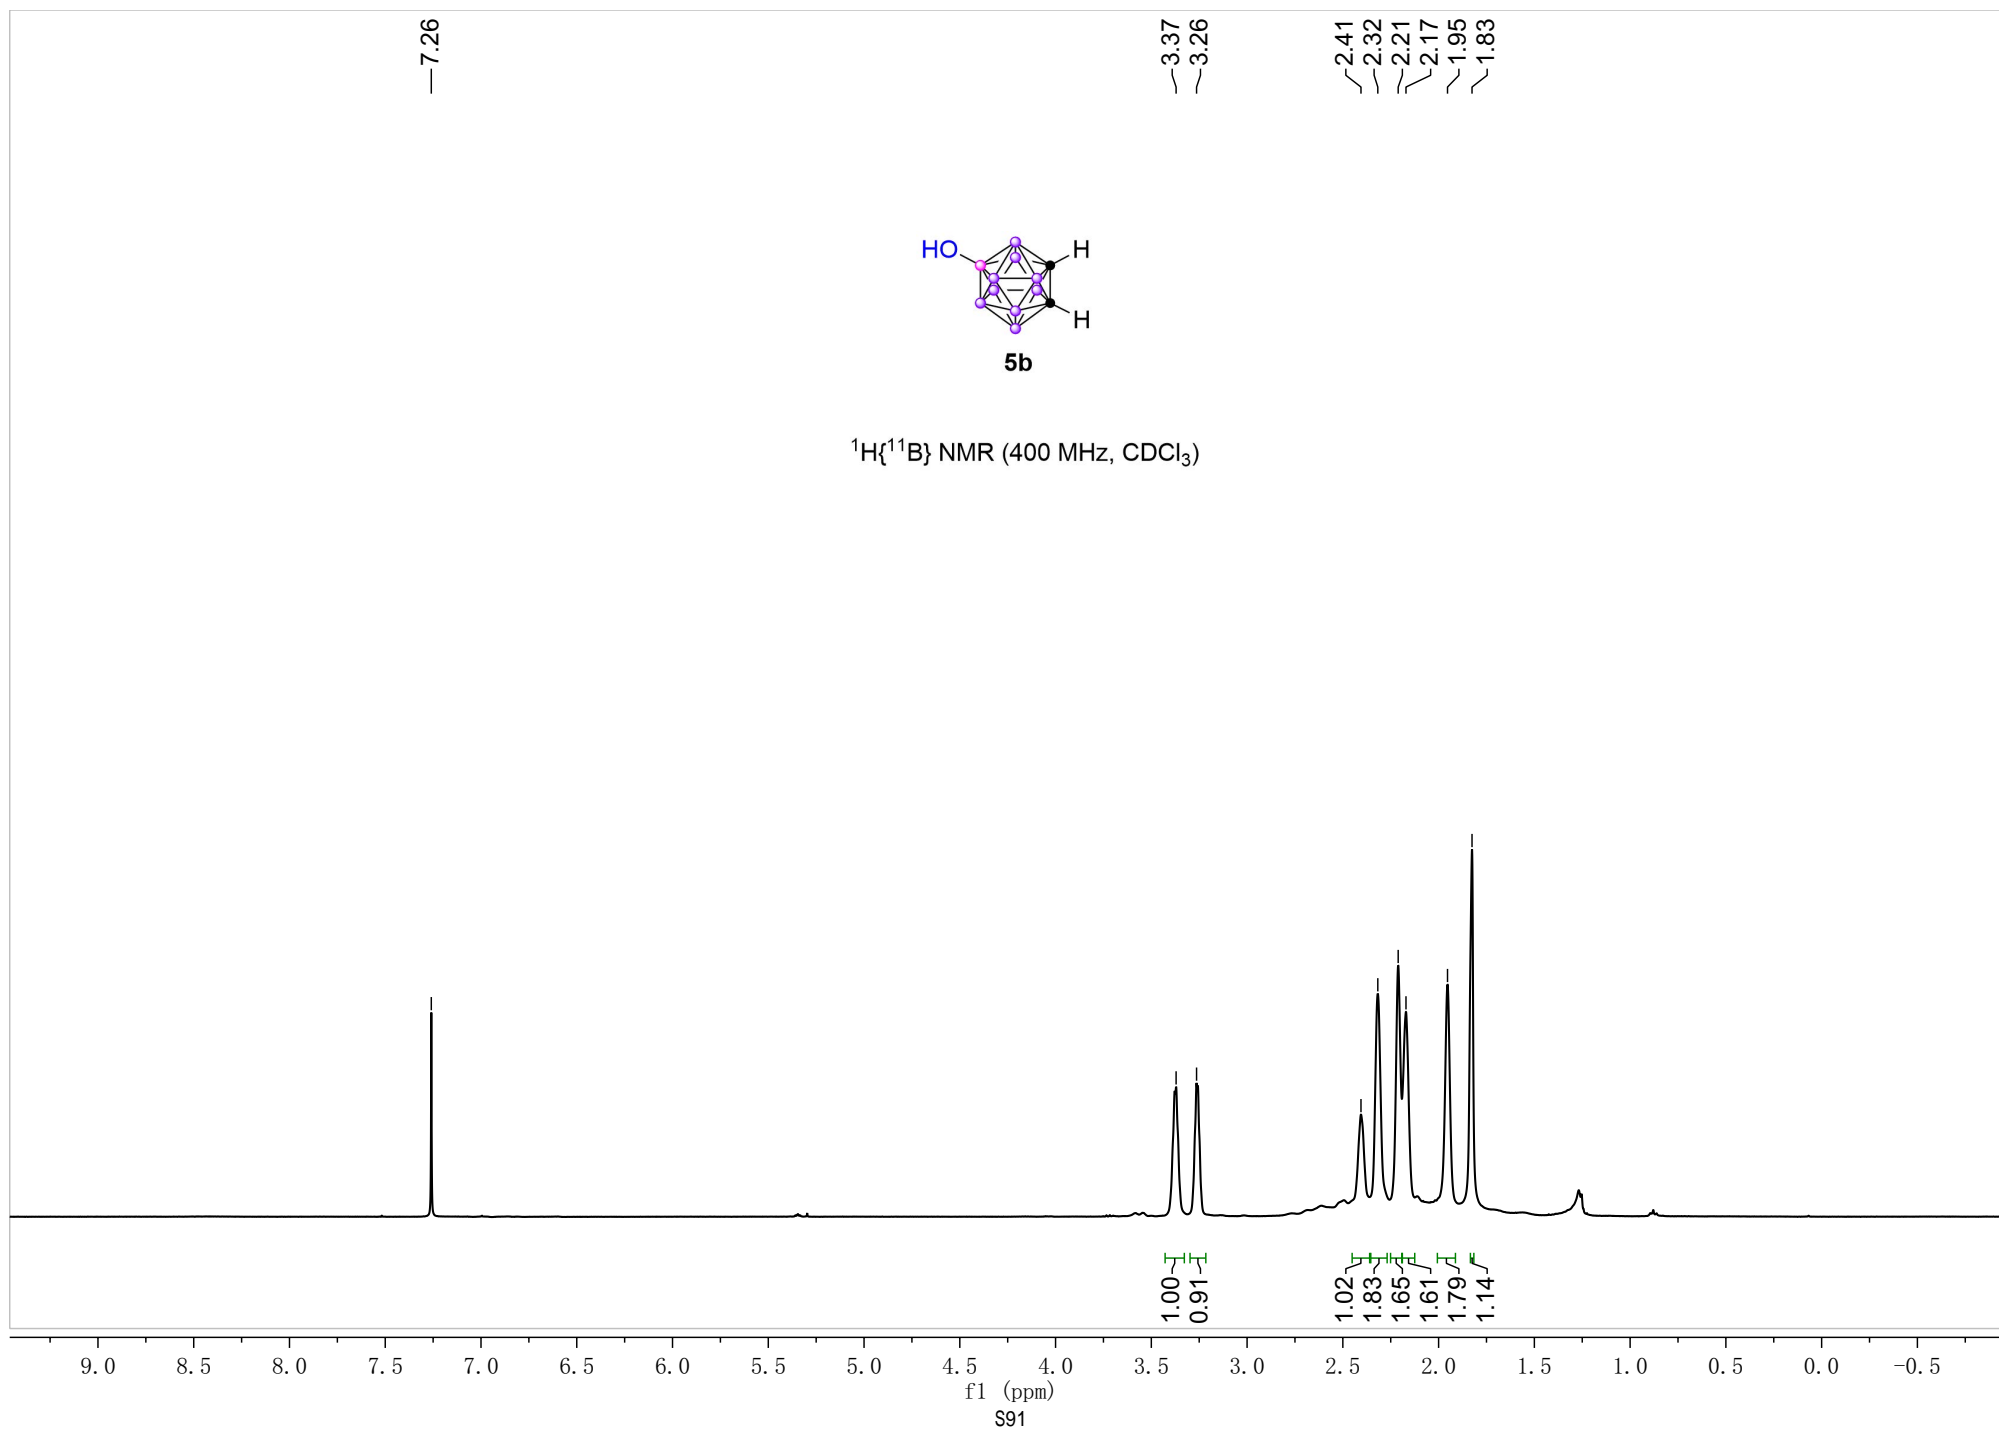

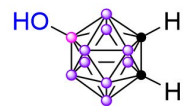

**5b**

$^{11}\text{B}$  NMR (128 MHz,  $\text{CDCl}_3$ )

—14.65

—3.20  
—4.35

—9.61  
—10.78

—14.57  
—16.01  
—17.32  
—18.40

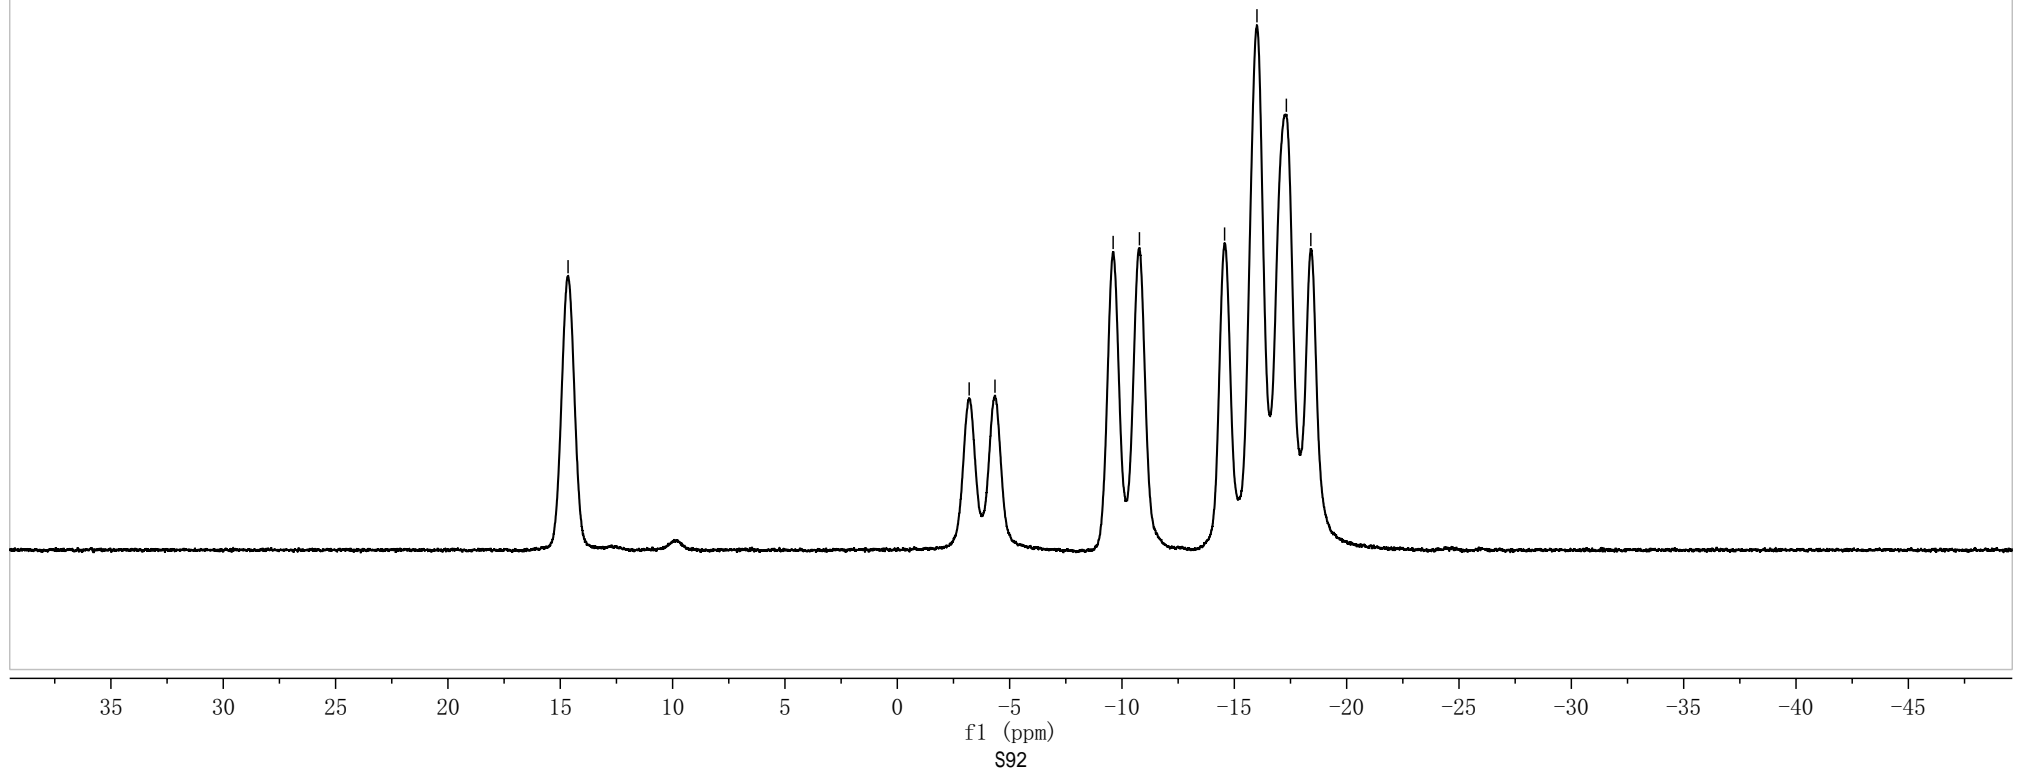



$^{11}\text{B}\{^1\text{H}\}$  NMR (128 MHz,  $\text{CDCl}_3$ )

—14.68

—-3.76

—-10.18

—-15.21

—-16.75

—-17.72

1.00

1.17

2.07

2.09

2.07

1.89

35 30 25 20 15 10 5 0 -5 -10 -15 -20 -25 -30 -35 -40 -45

f1 (ppm)  
S93



$^{13}\text{C}$  NMR (101 MHz,  $\text{CDCl}_3$ )

77.32  
77.00  
76.68

49.10

37.07

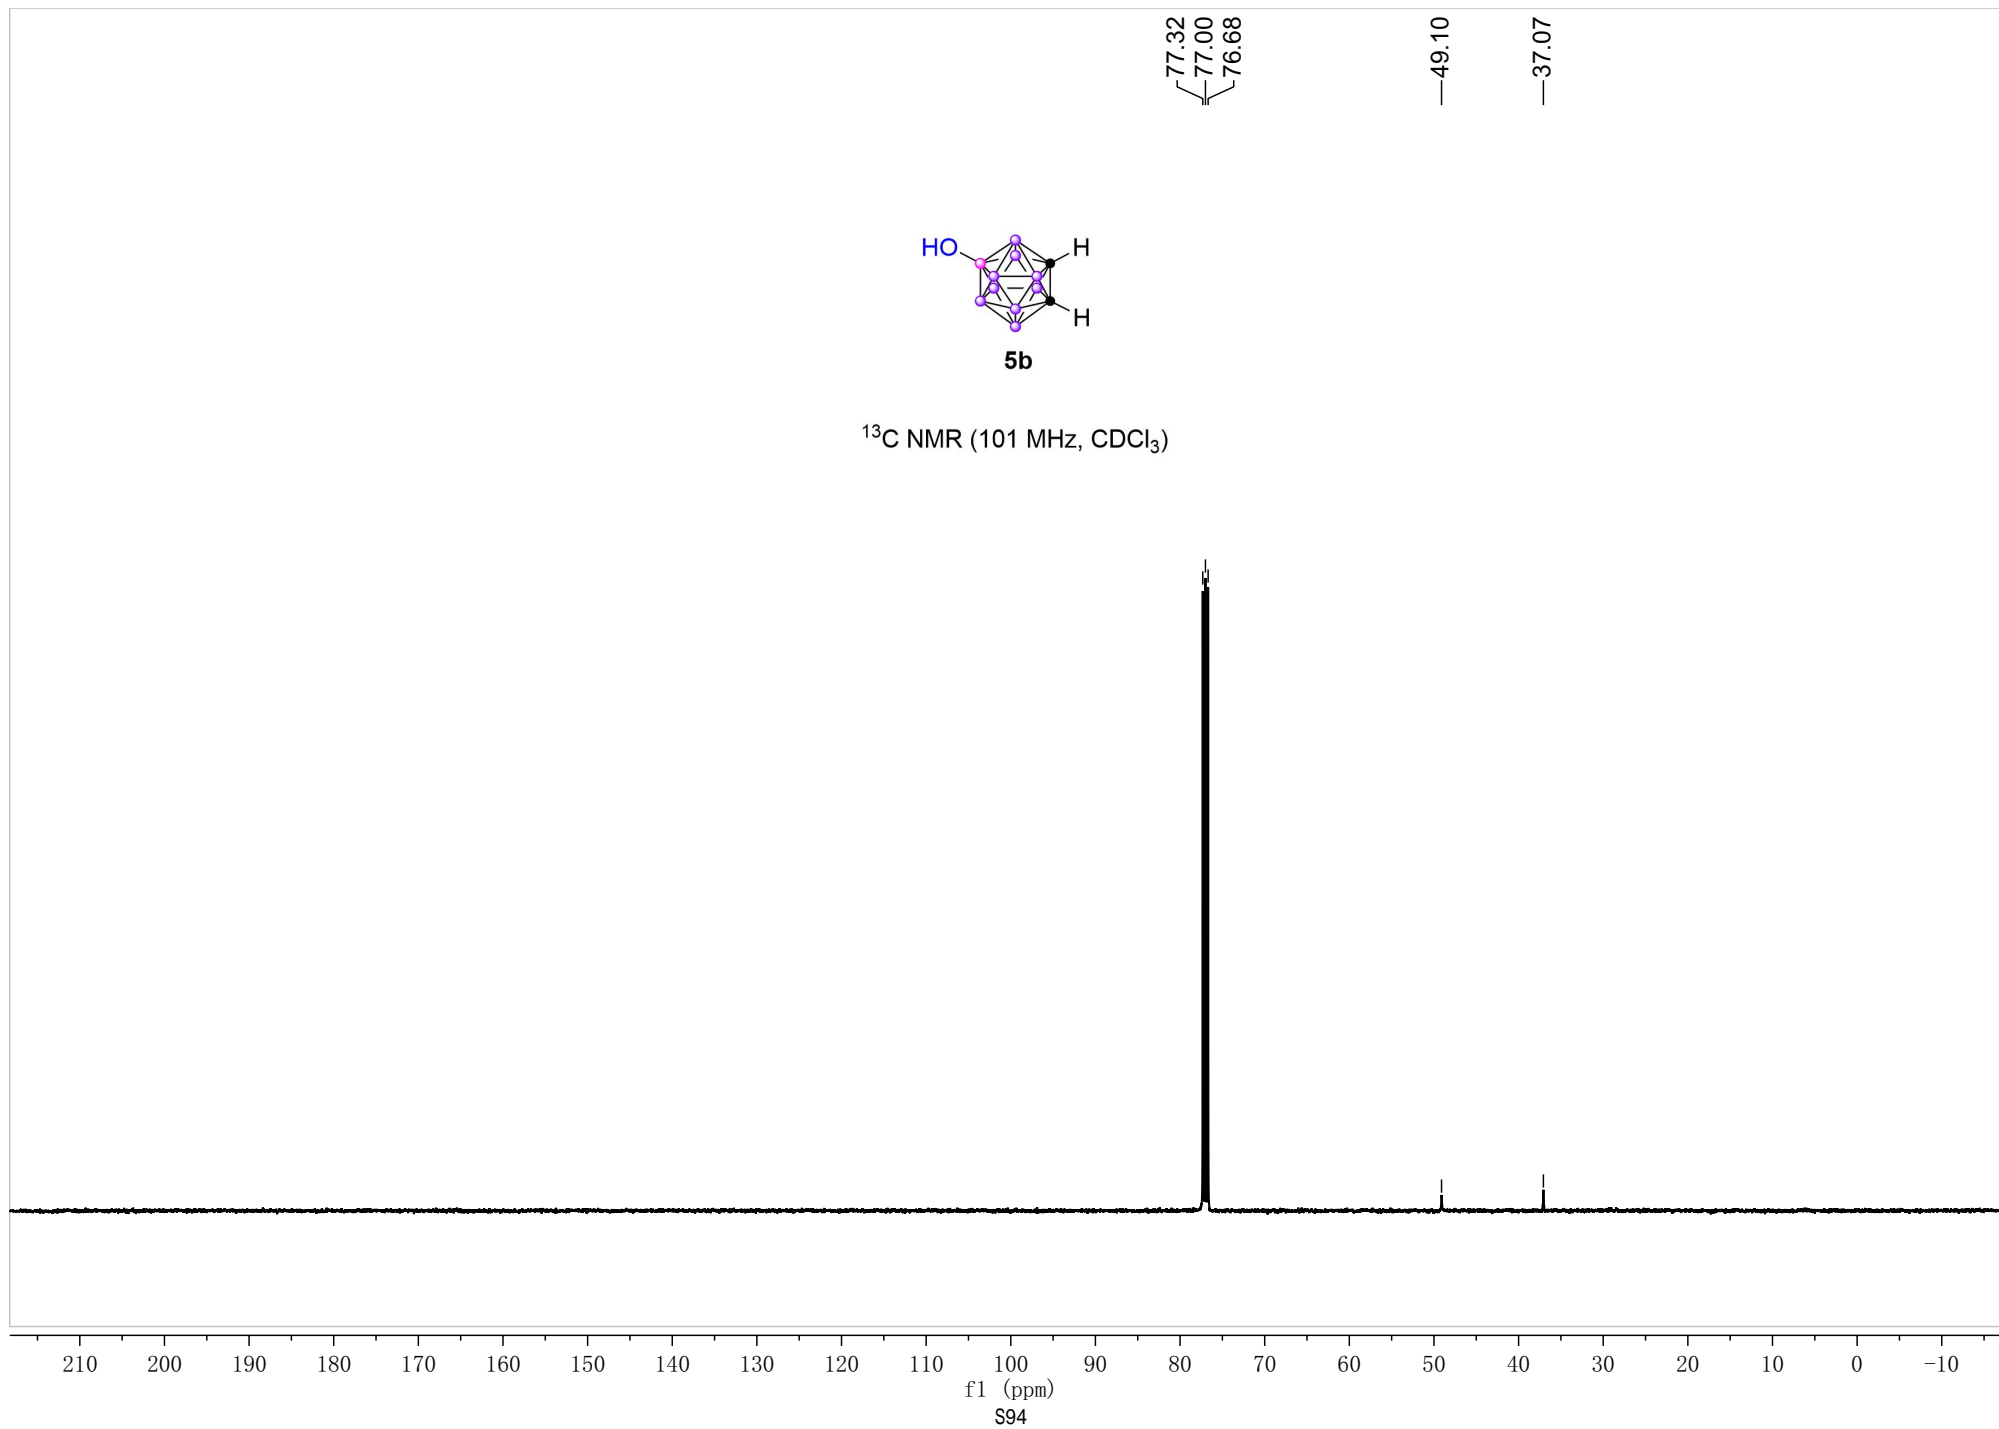



—7.26

—3.55

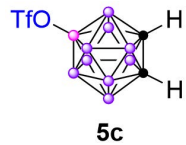

$^1\text{H}$  NMR (400 MHz,  $\text{CDCl}_3$ )

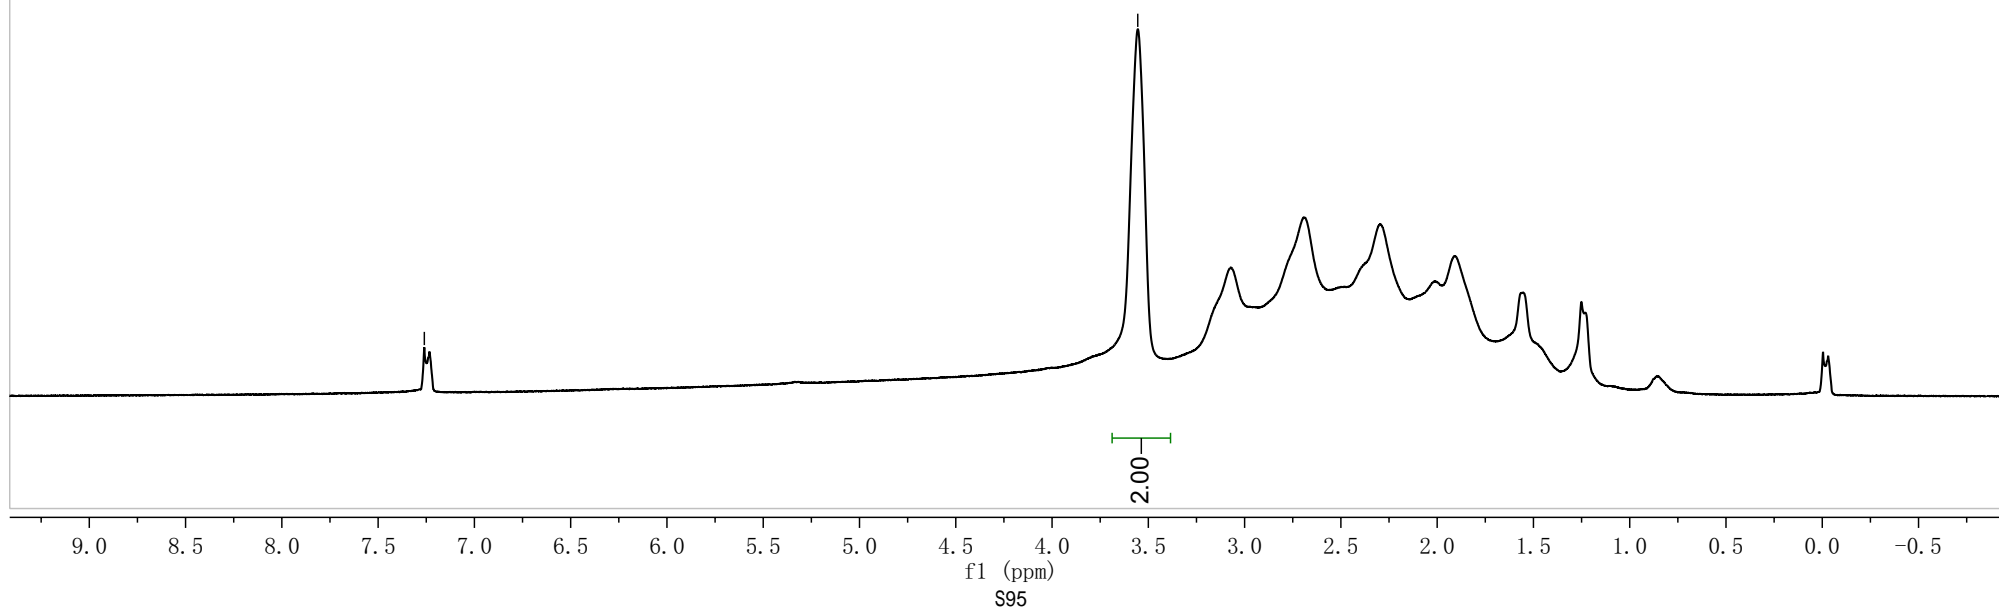

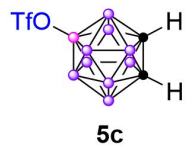

$^1\text{H}\{^{11}\text{B}\}$  NMR (400 MHz,  $\text{CDCl}_3$ )

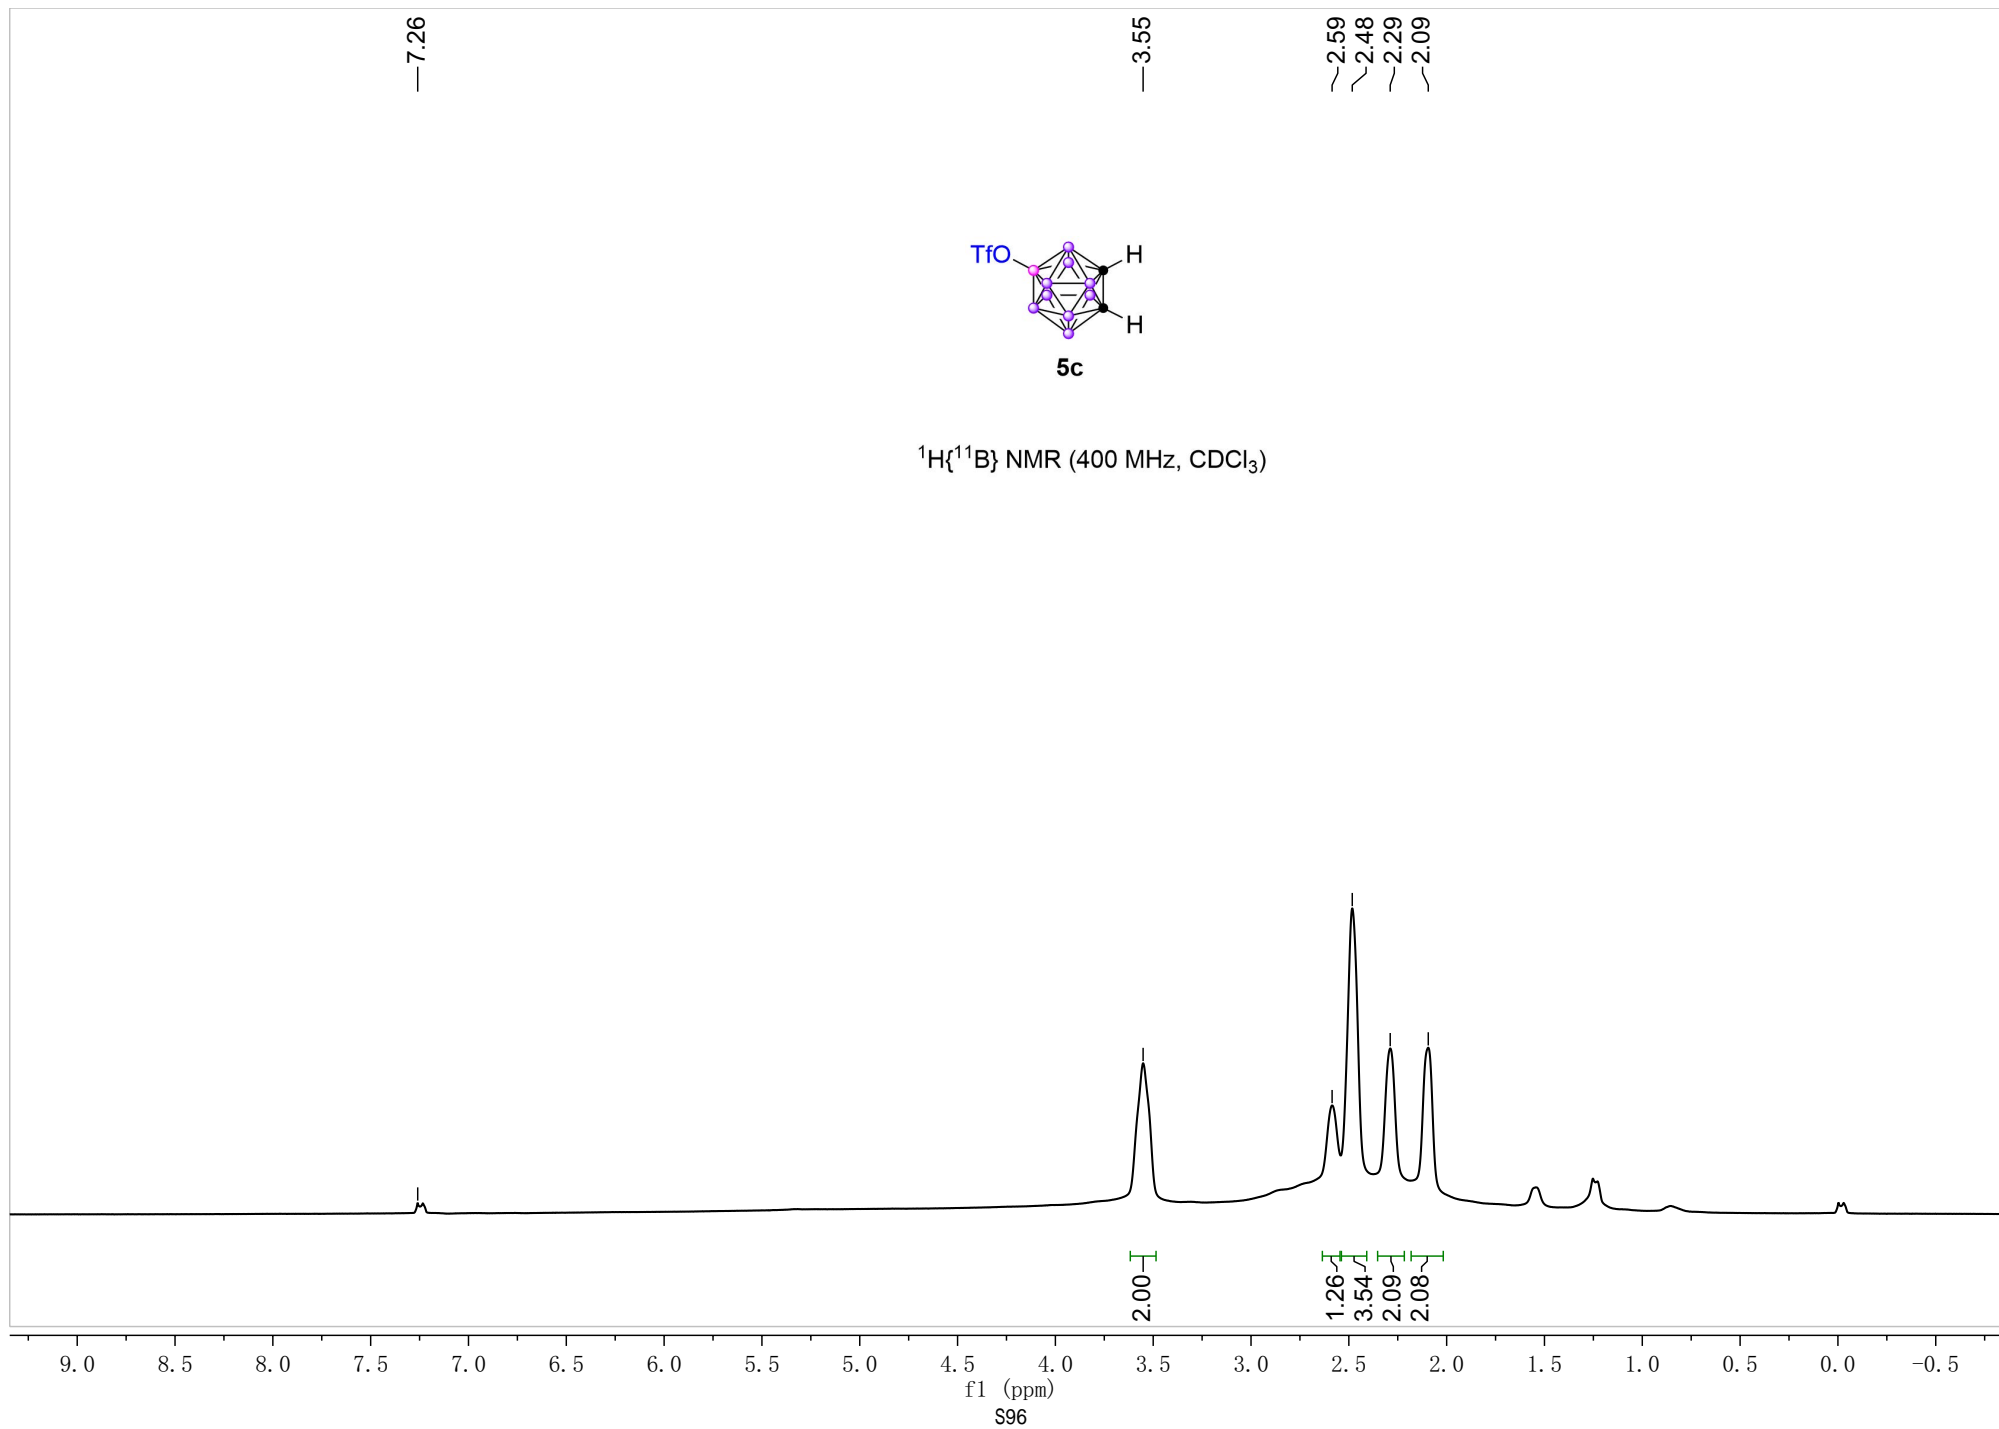



$^{11}\text{B}$  NMR (128 MHz,  $\text{CDCl}_3$ )

—9.92

—3.03  
—4.18

—9.81  
—11.04

—14.49  
—15.76  
—16.52  
—17.81

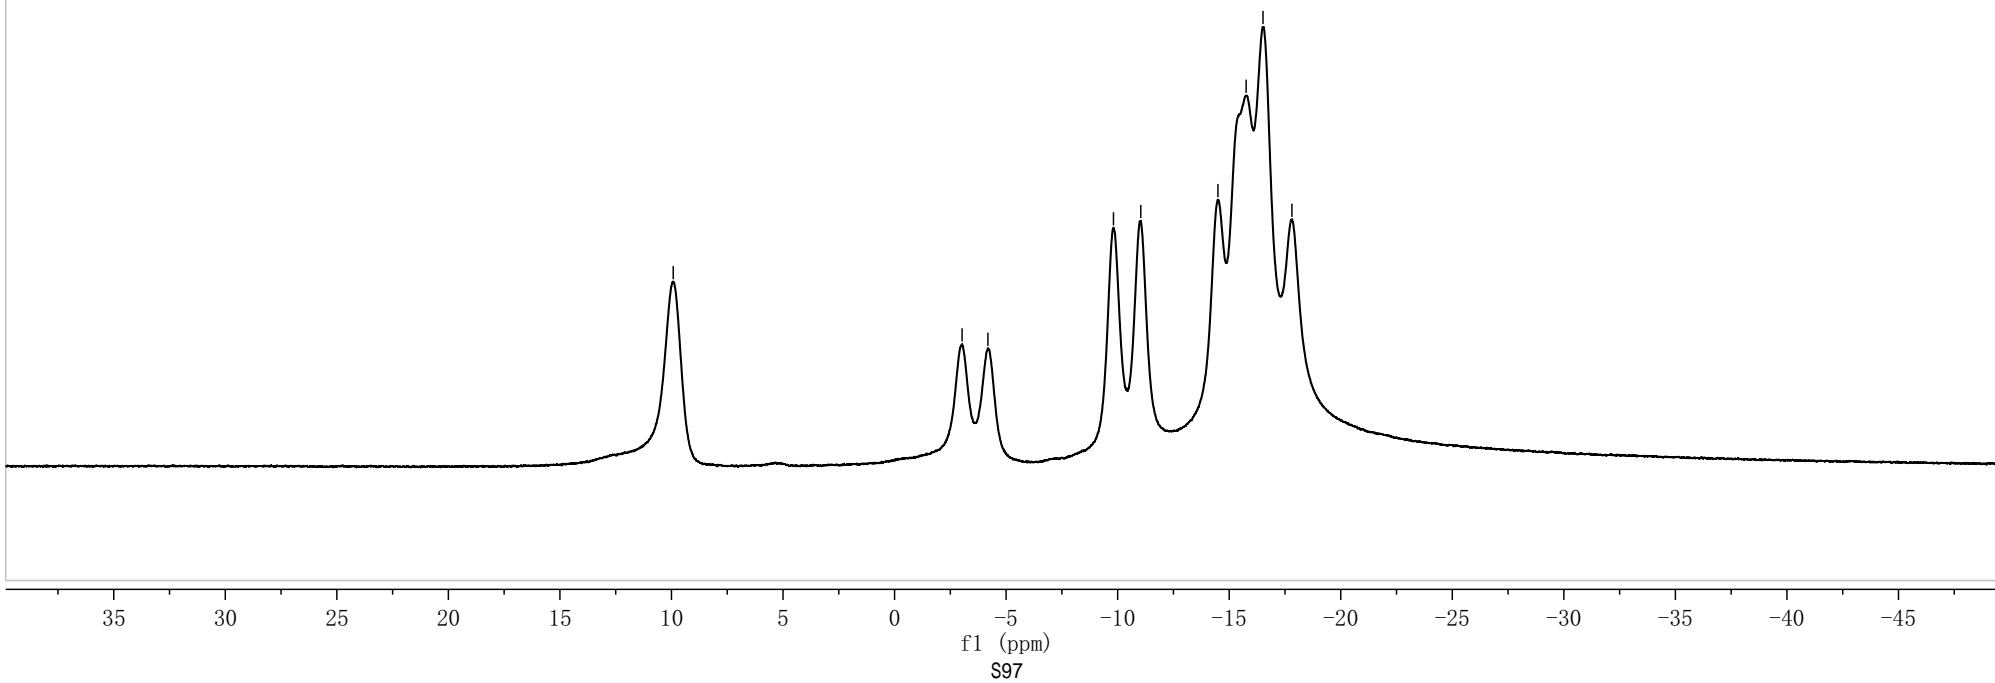



$^{11}\text{B}\{^1\text{H}\}$  NMR (128 MHz,  $\text{CDCl}_3$ )

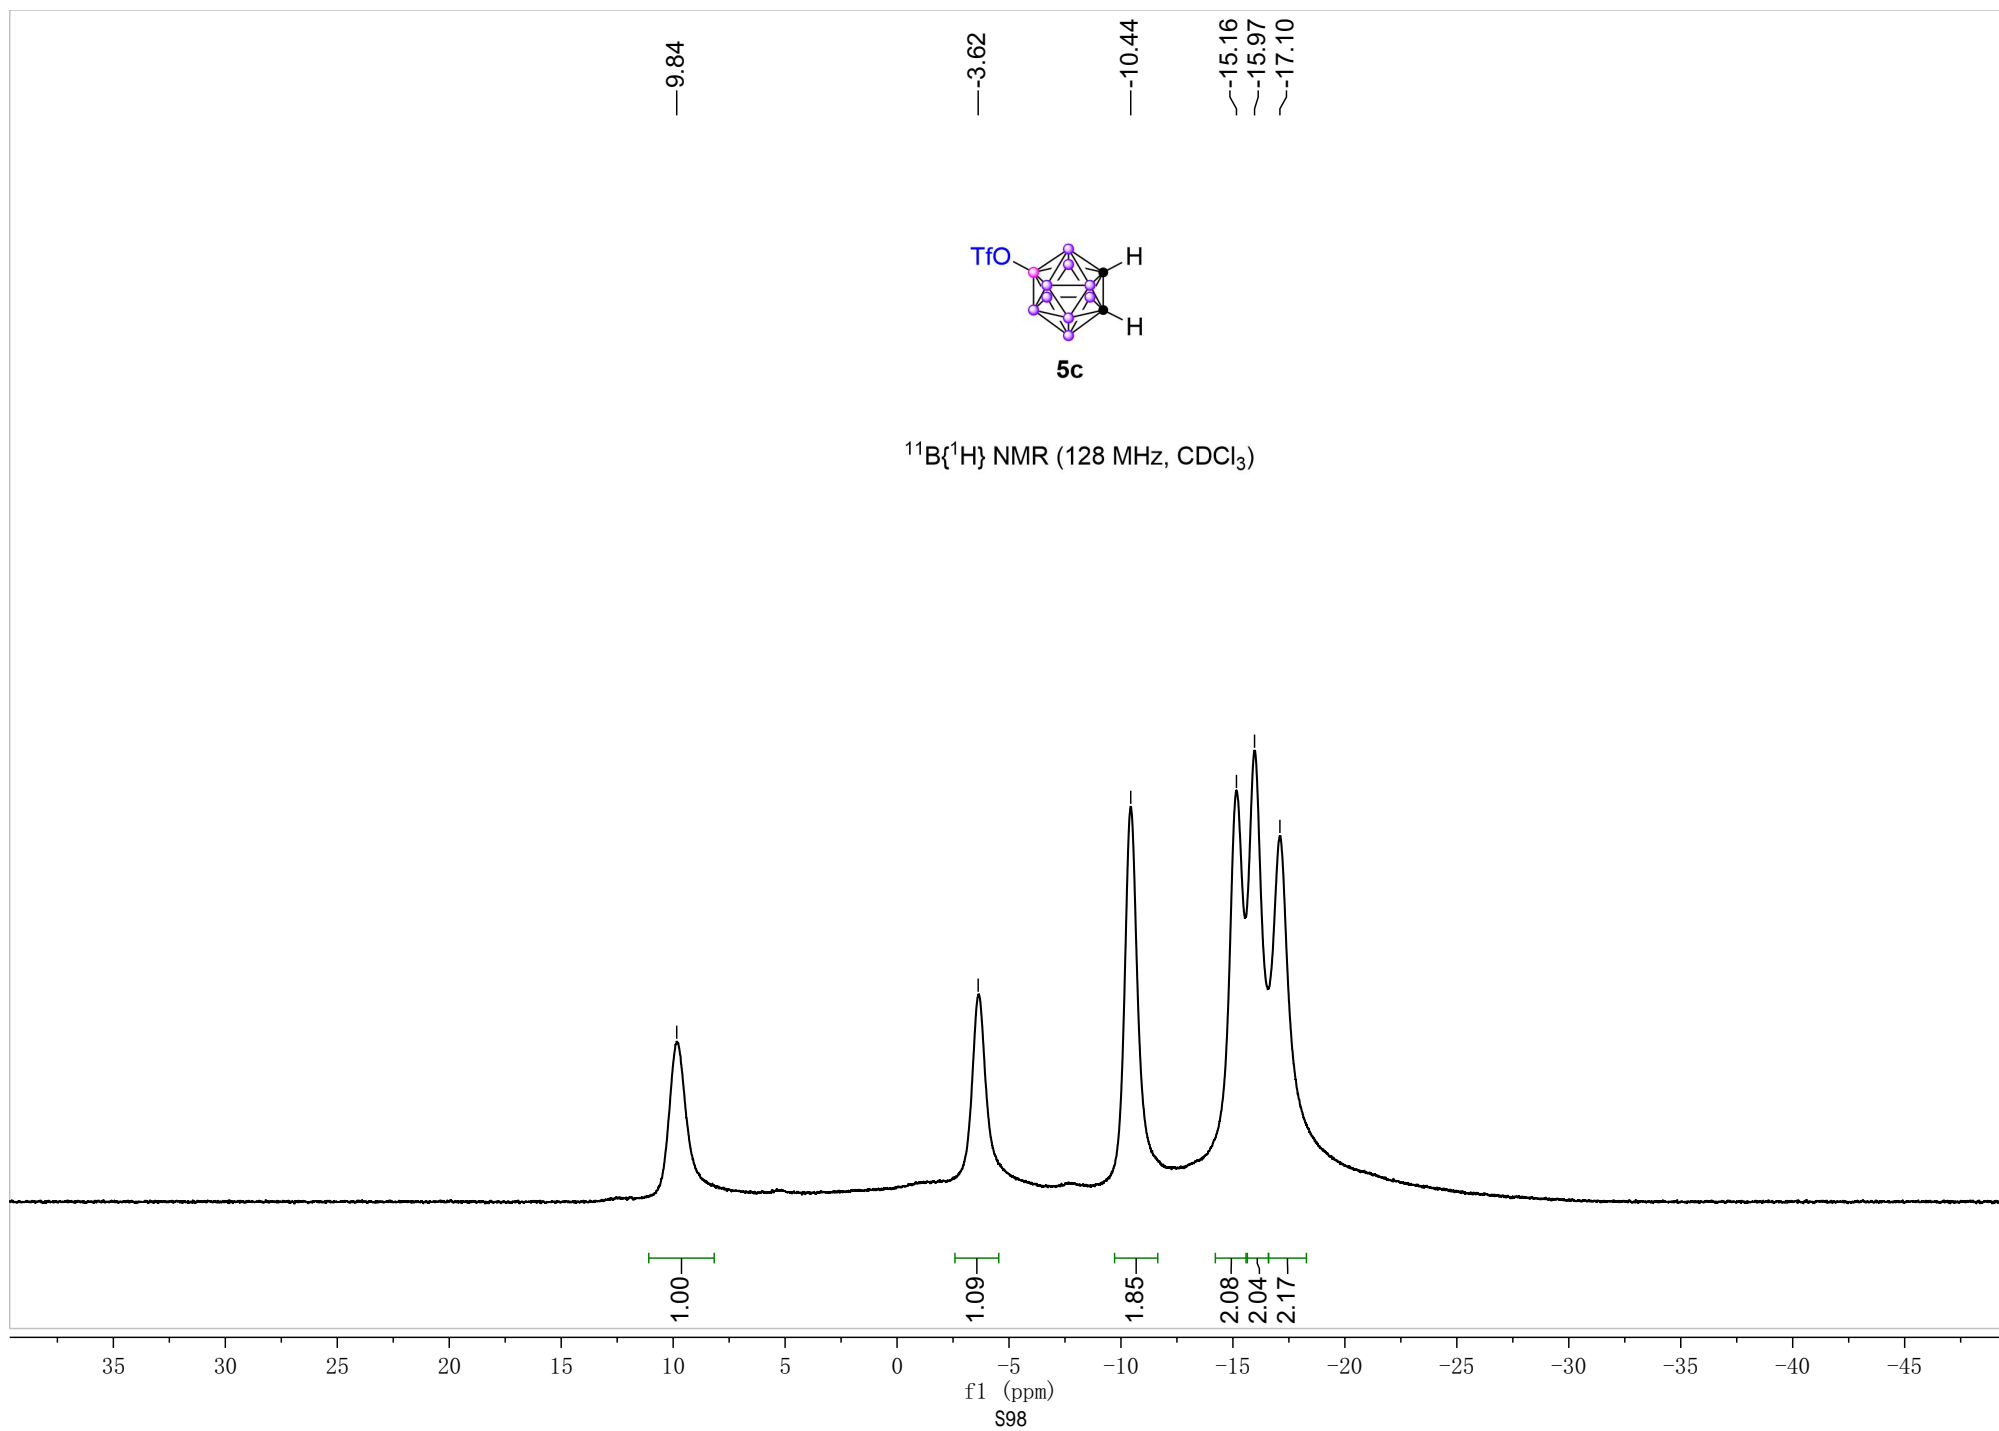



$^{19}\text{F}$  NMR (377 MHz,  $\text{CDCl}_3$ )

---75.91

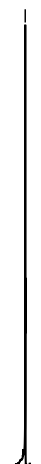

20 10 0 -10 -20 -30 -40 -50 -60 -70 -80 -90 -100 -110 -120 -130 -140 -150 -160 -170 -180 -190 -200 -210 -220  
f1 (ppm)  
S99

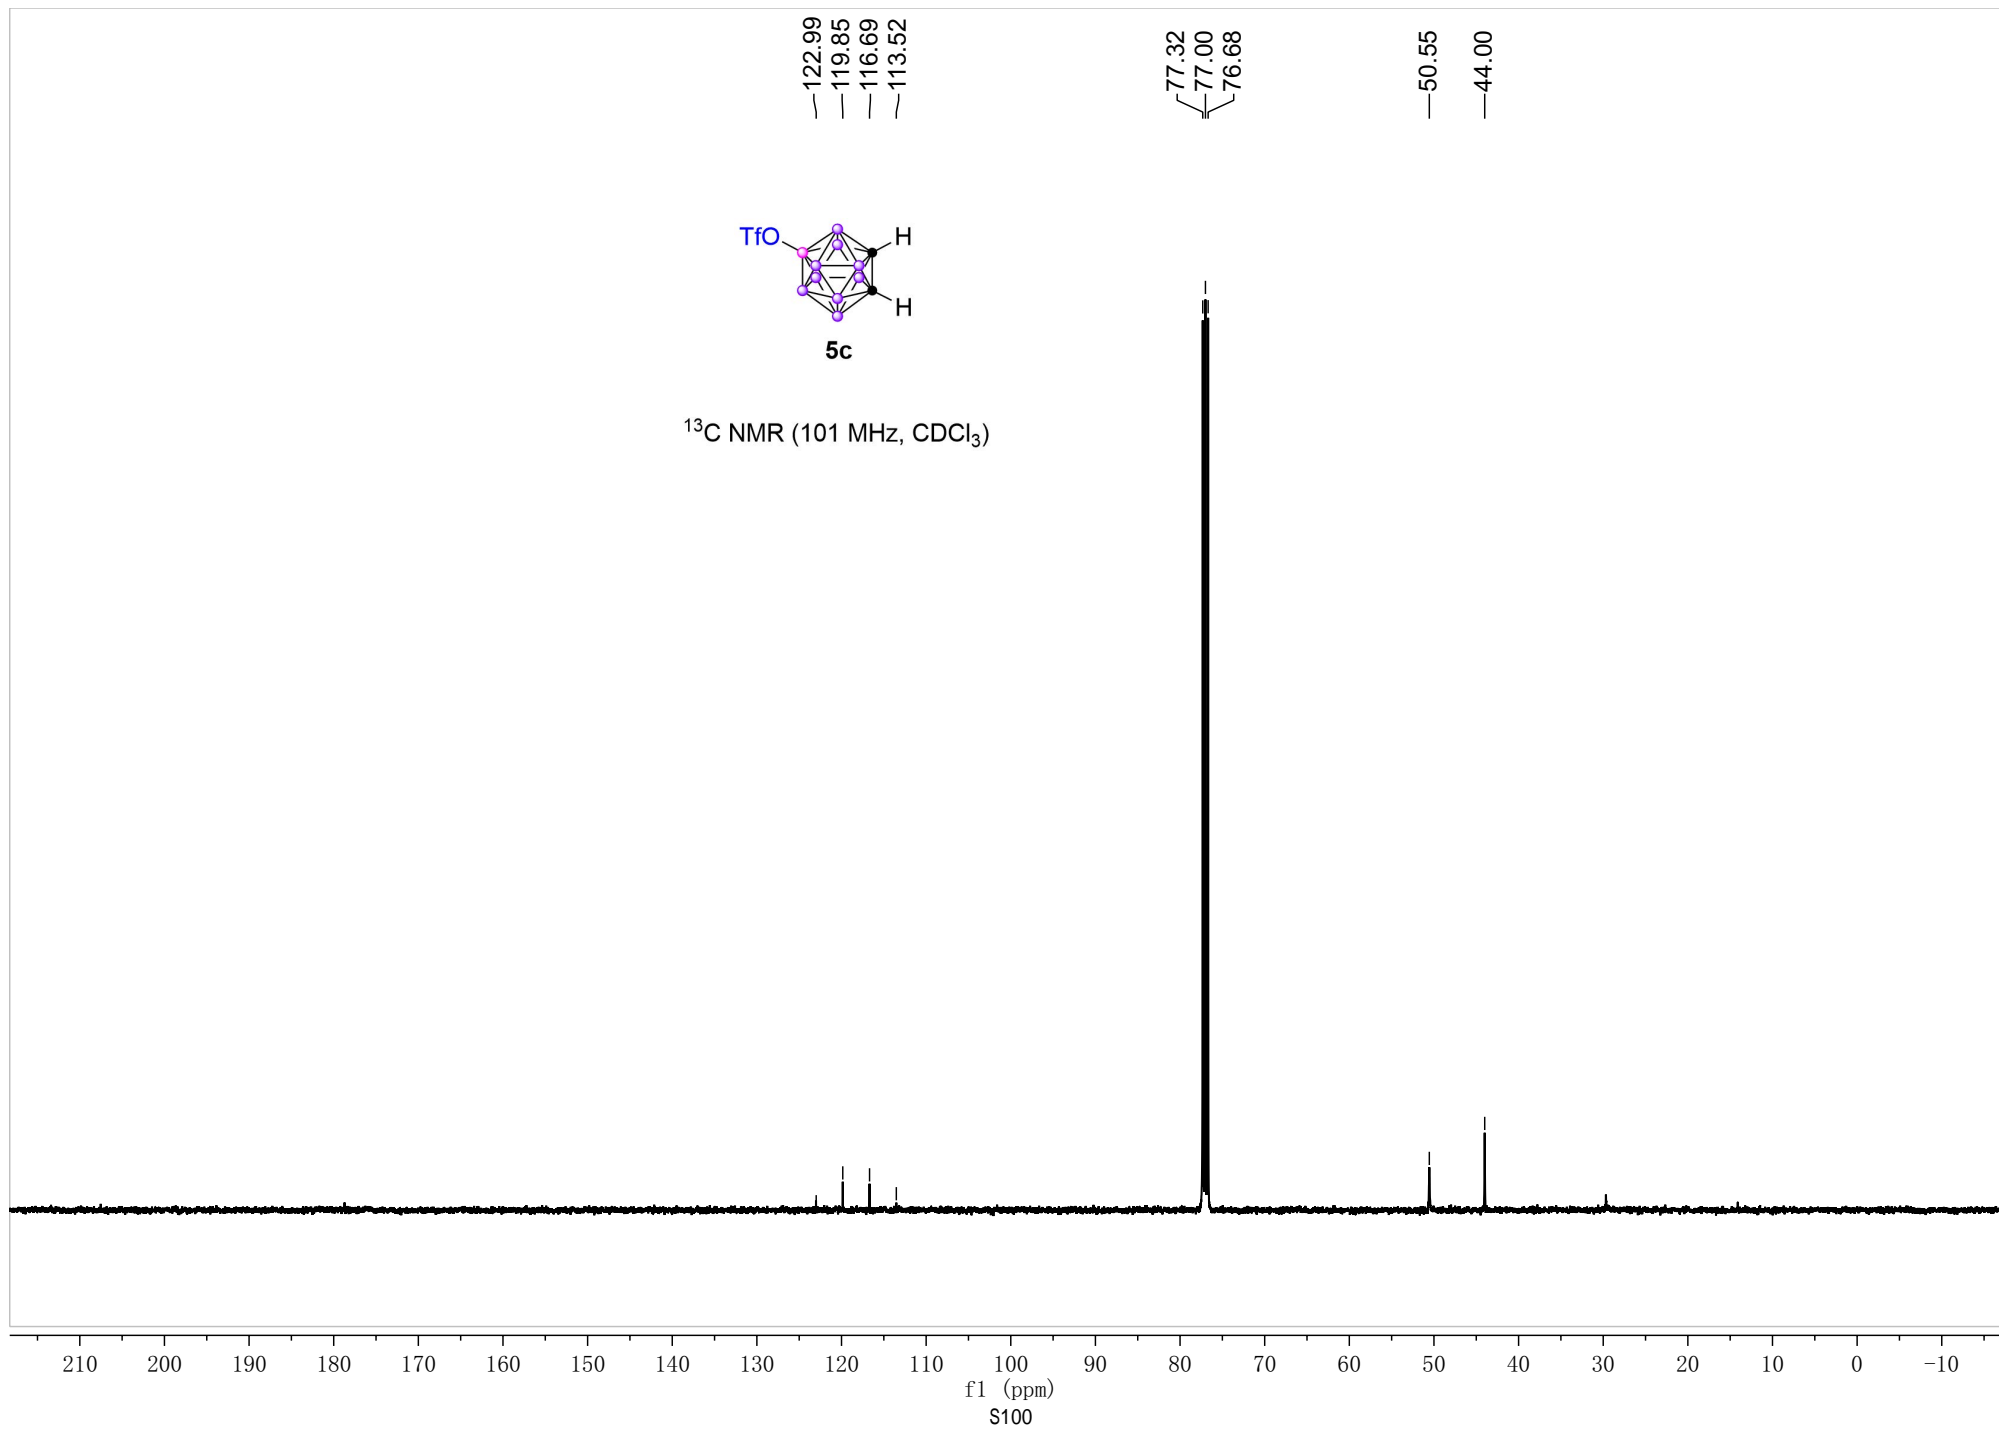

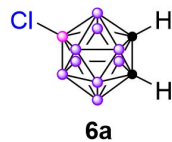

$^1\text{H}$  NMR (400 MHz,  $\text{CDCl}_3$ )

—7.26

—3.57  
—3.45

1.00  
0.96

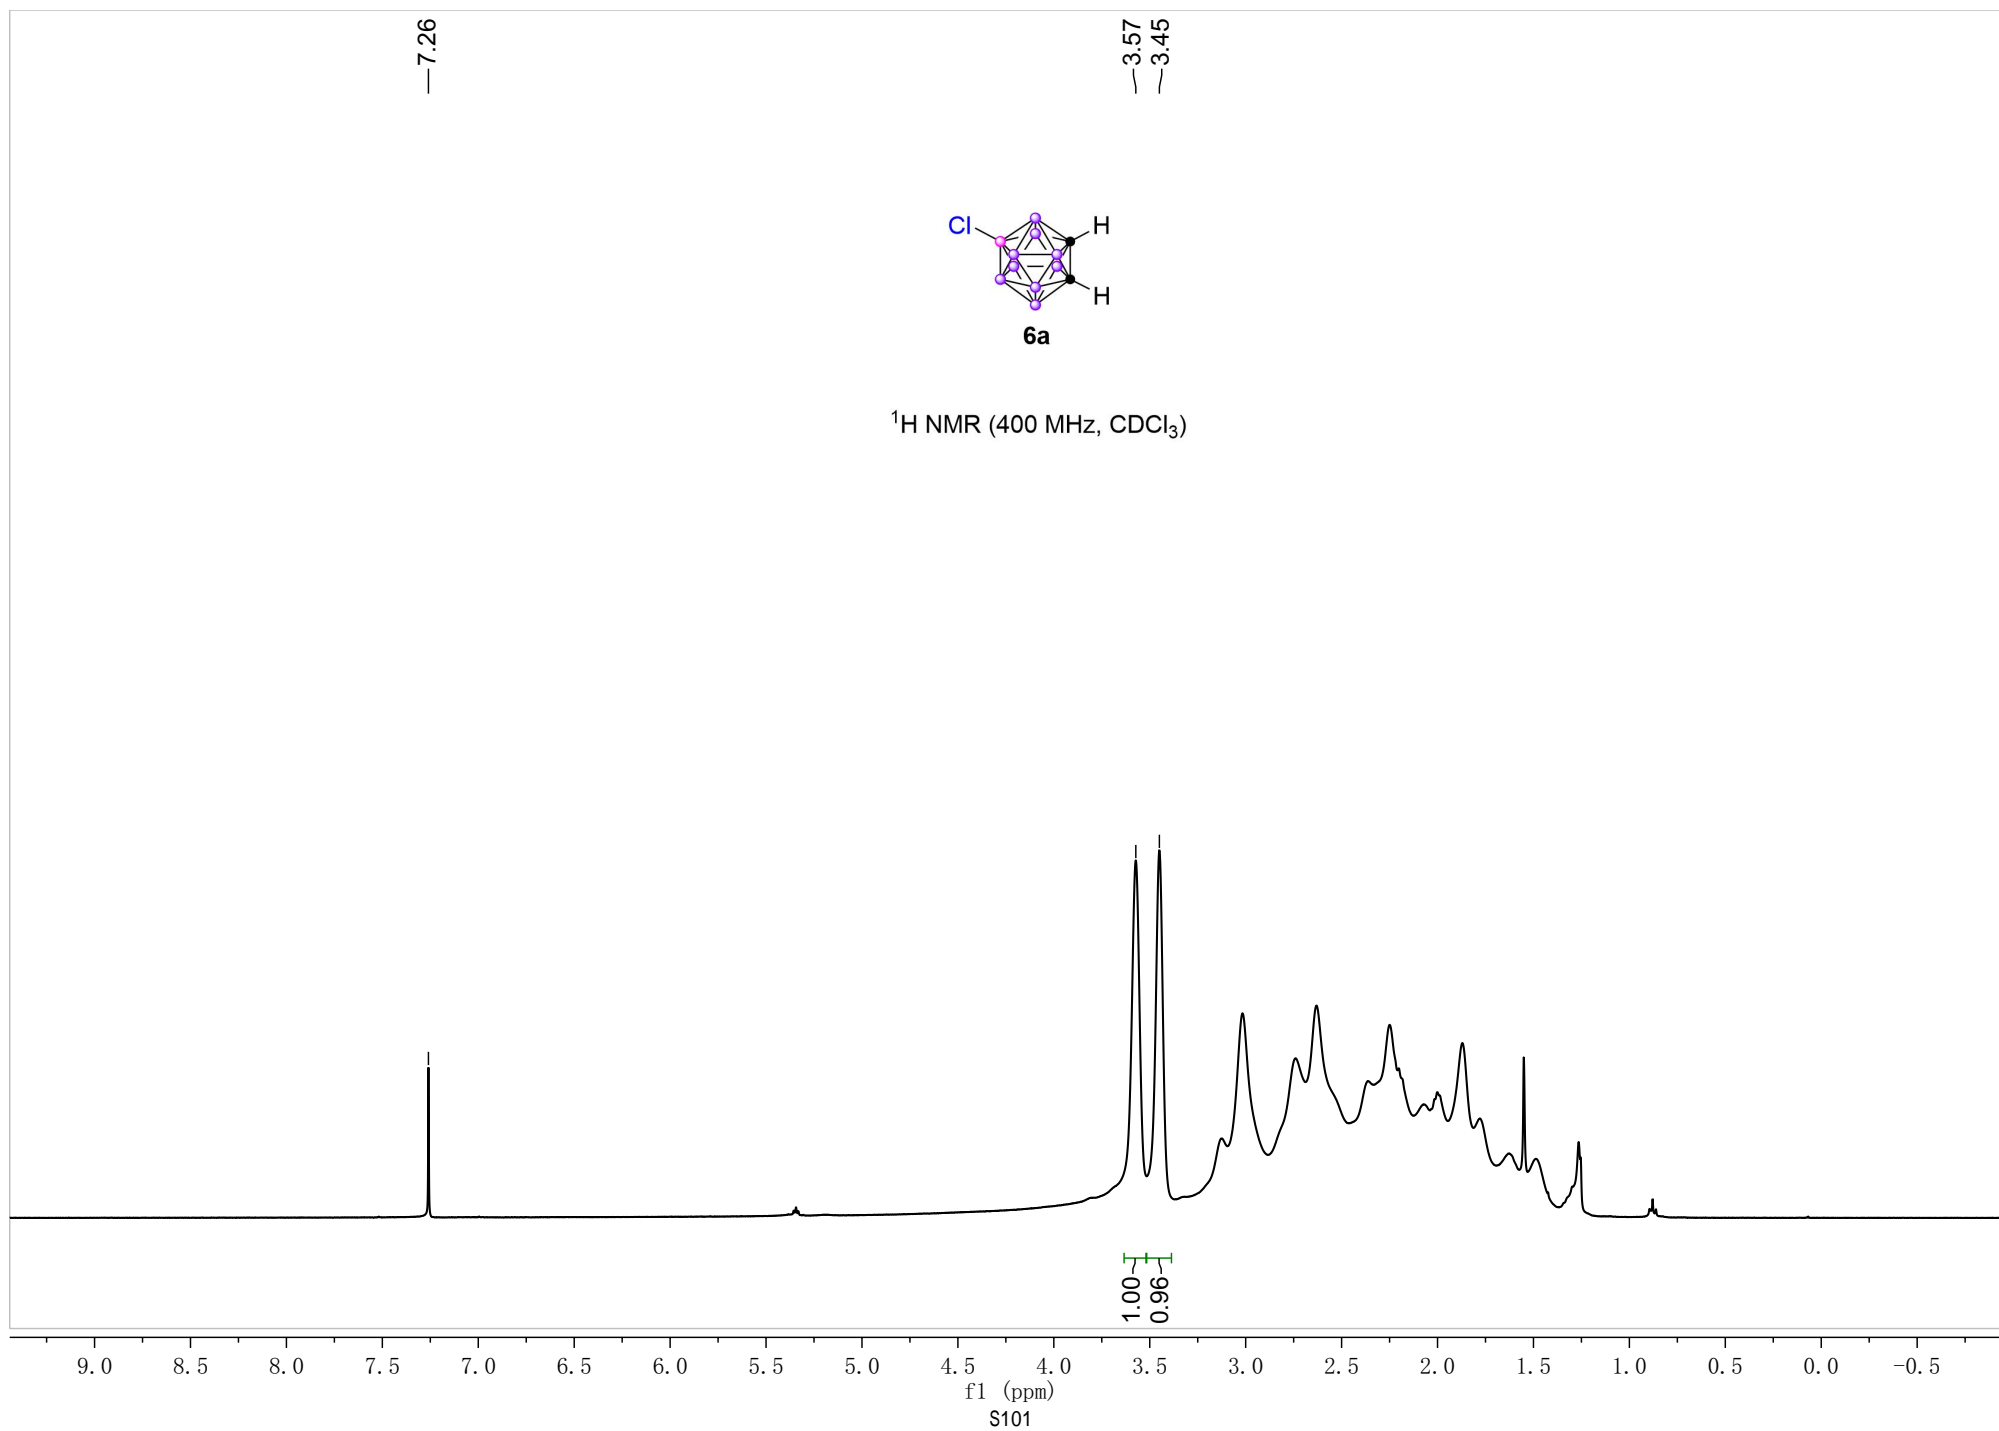



$^1\text{H}\{^{11}\text{B}\}$  NMR (400 MHz,  $\text{CDCl}_3$ )

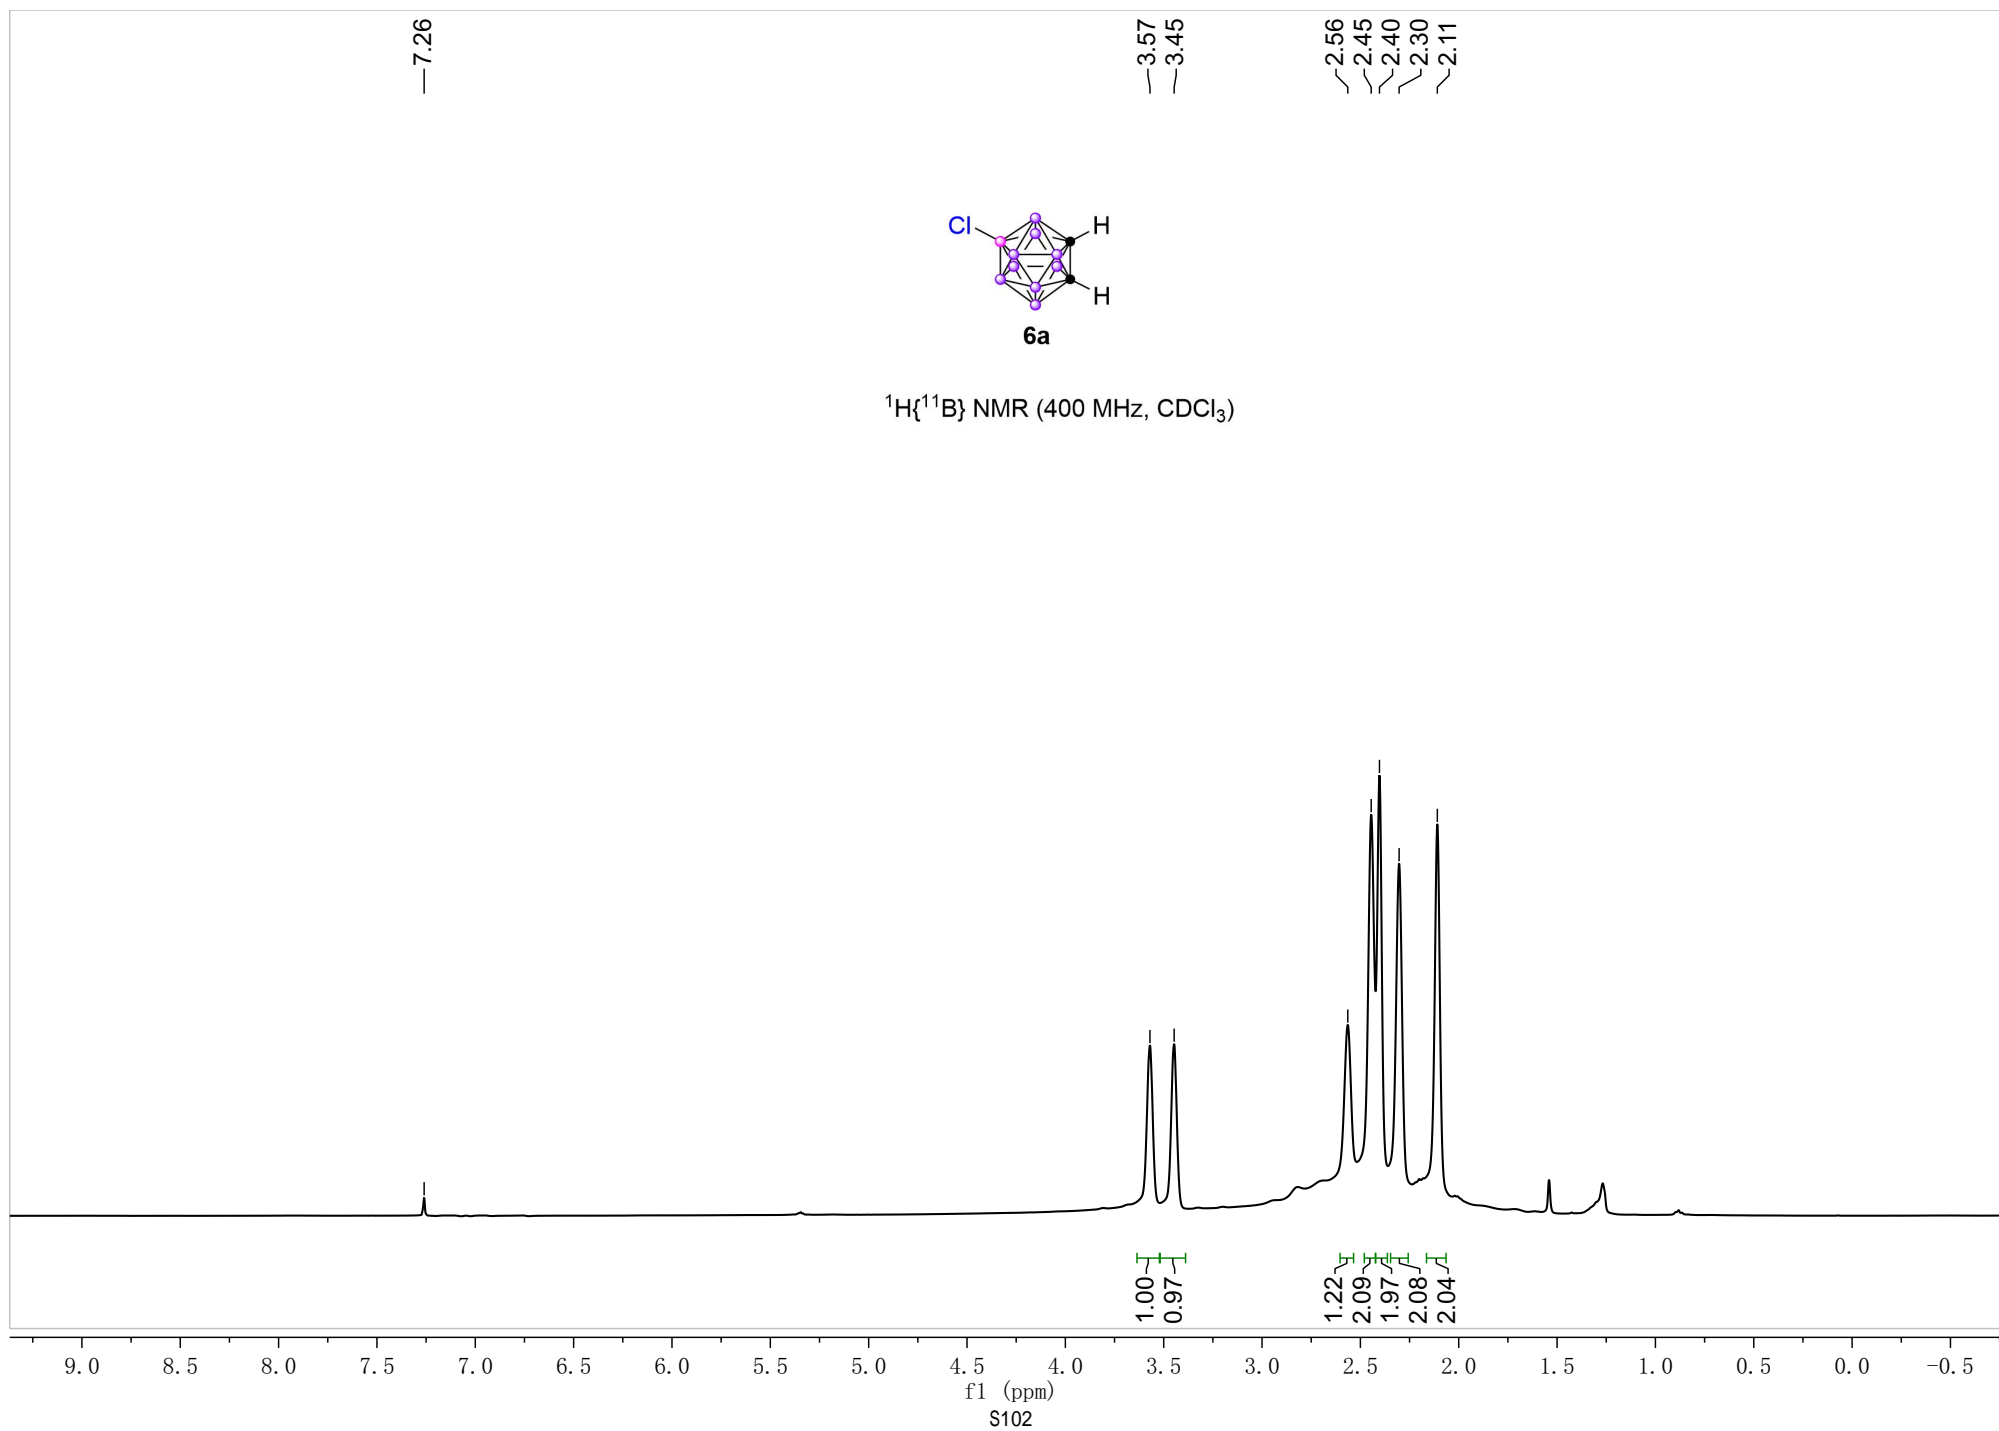



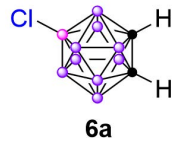

<sup>11</sup>B NMR (128 MHz, CDCl<sub>3</sub>)

7.40  
-1.47  
-2.66  
-8.19  
-9.38  
-13.20  
-14.48  
-15.68  
-16.96

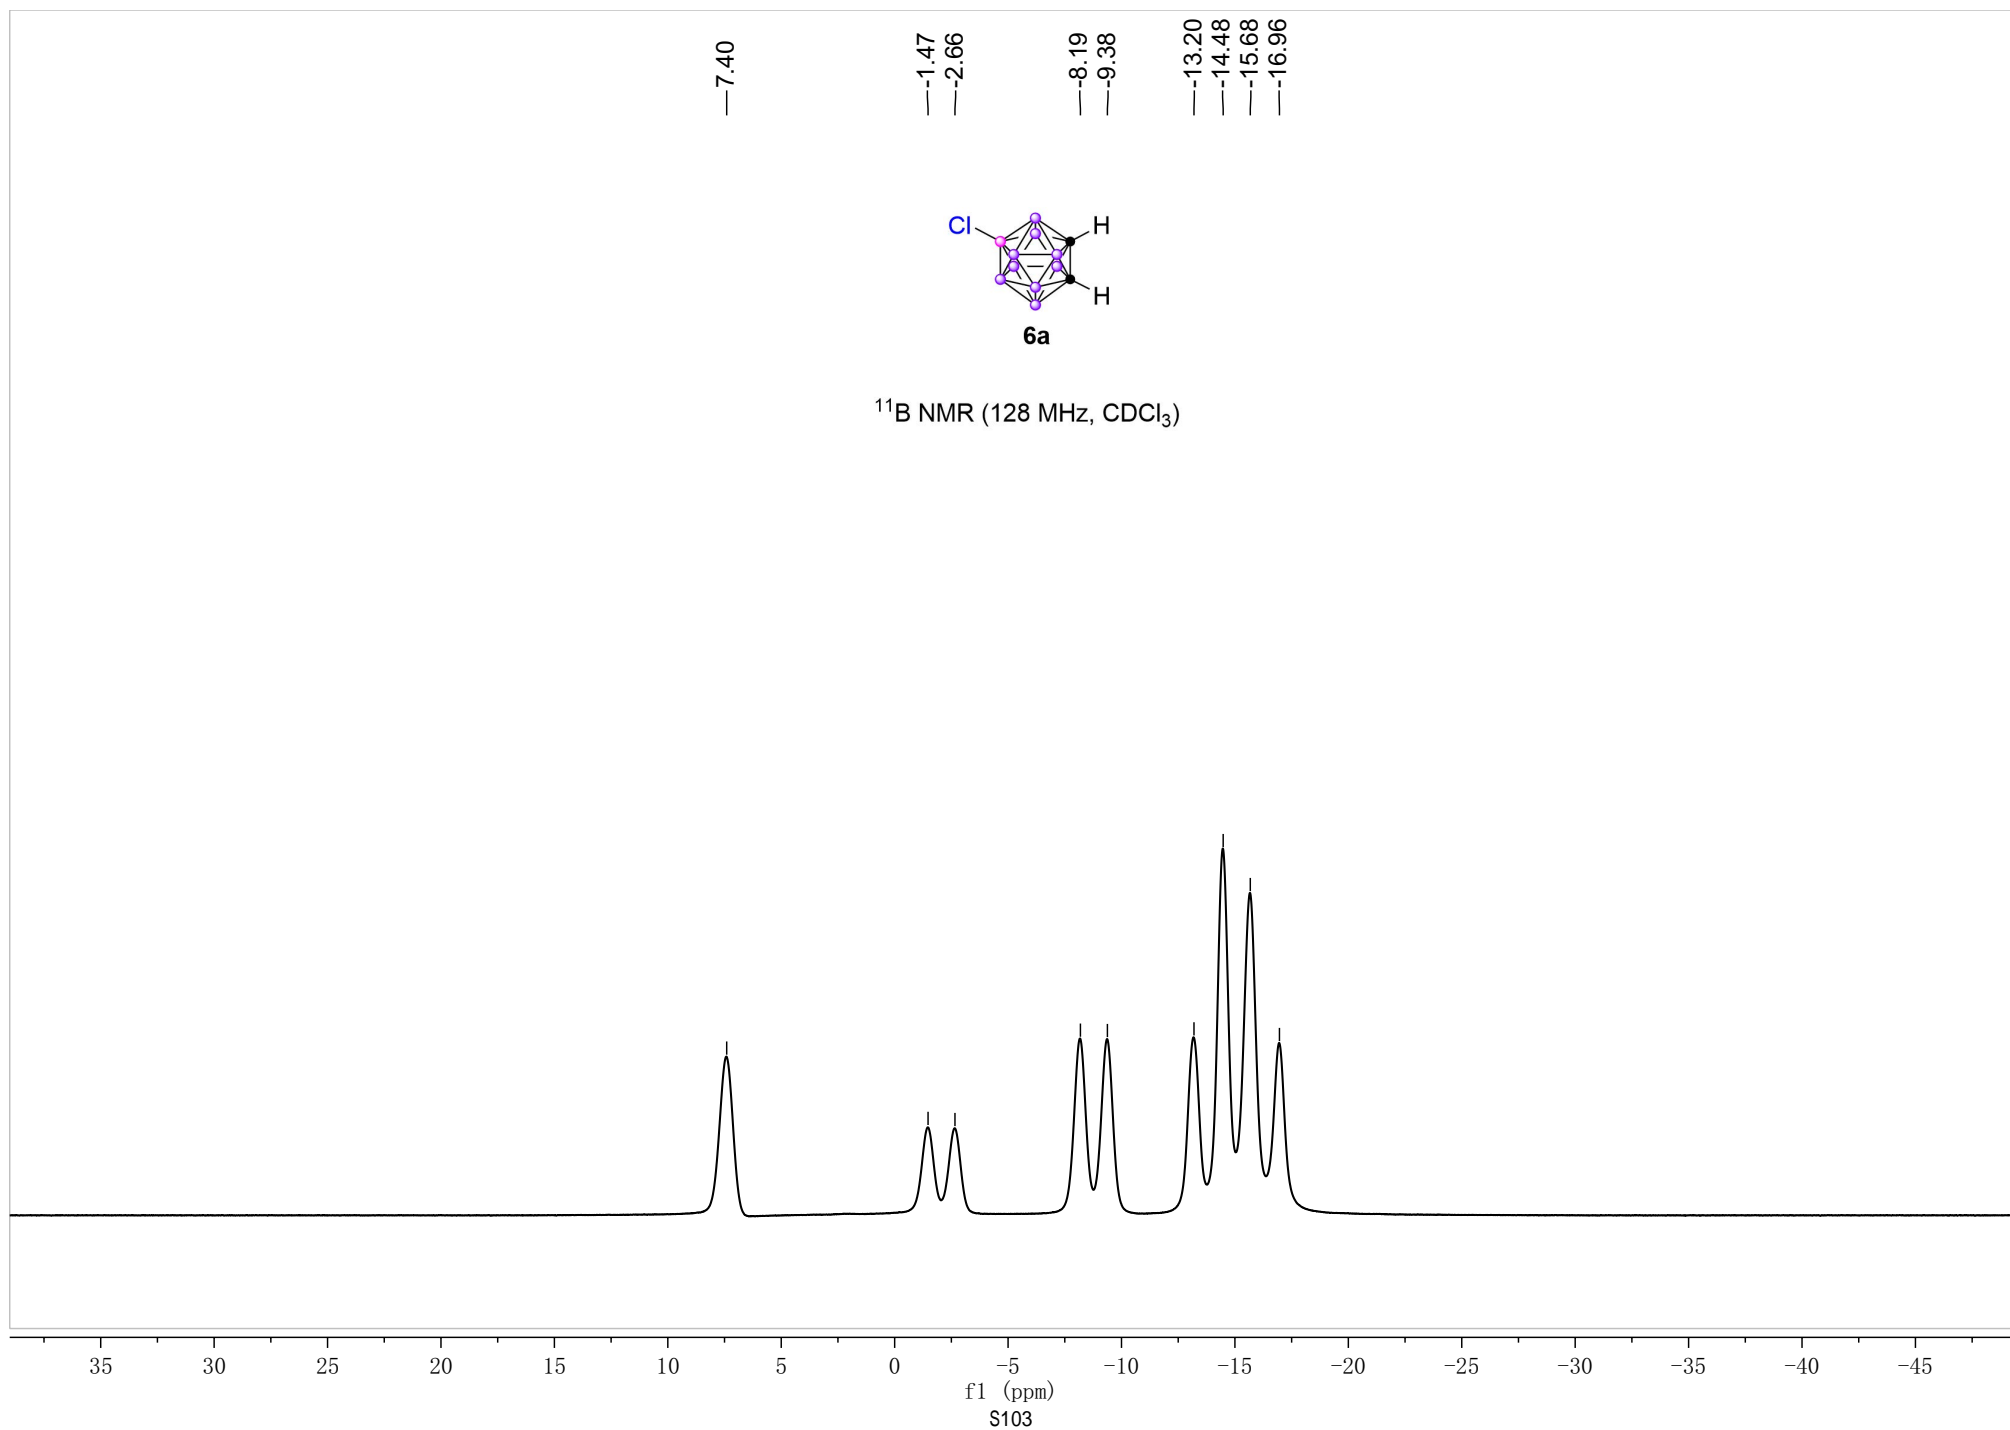

35 30 25 20 15 10 5 0 -5 -10 -15 -20 -25 -30 -35 -40 -45  
f1 (ppm)  
S103



$^{11}\text{B}\{^1\text{H}\}$  NMR (128 MHz,  $\text{CDCl}_3$ )

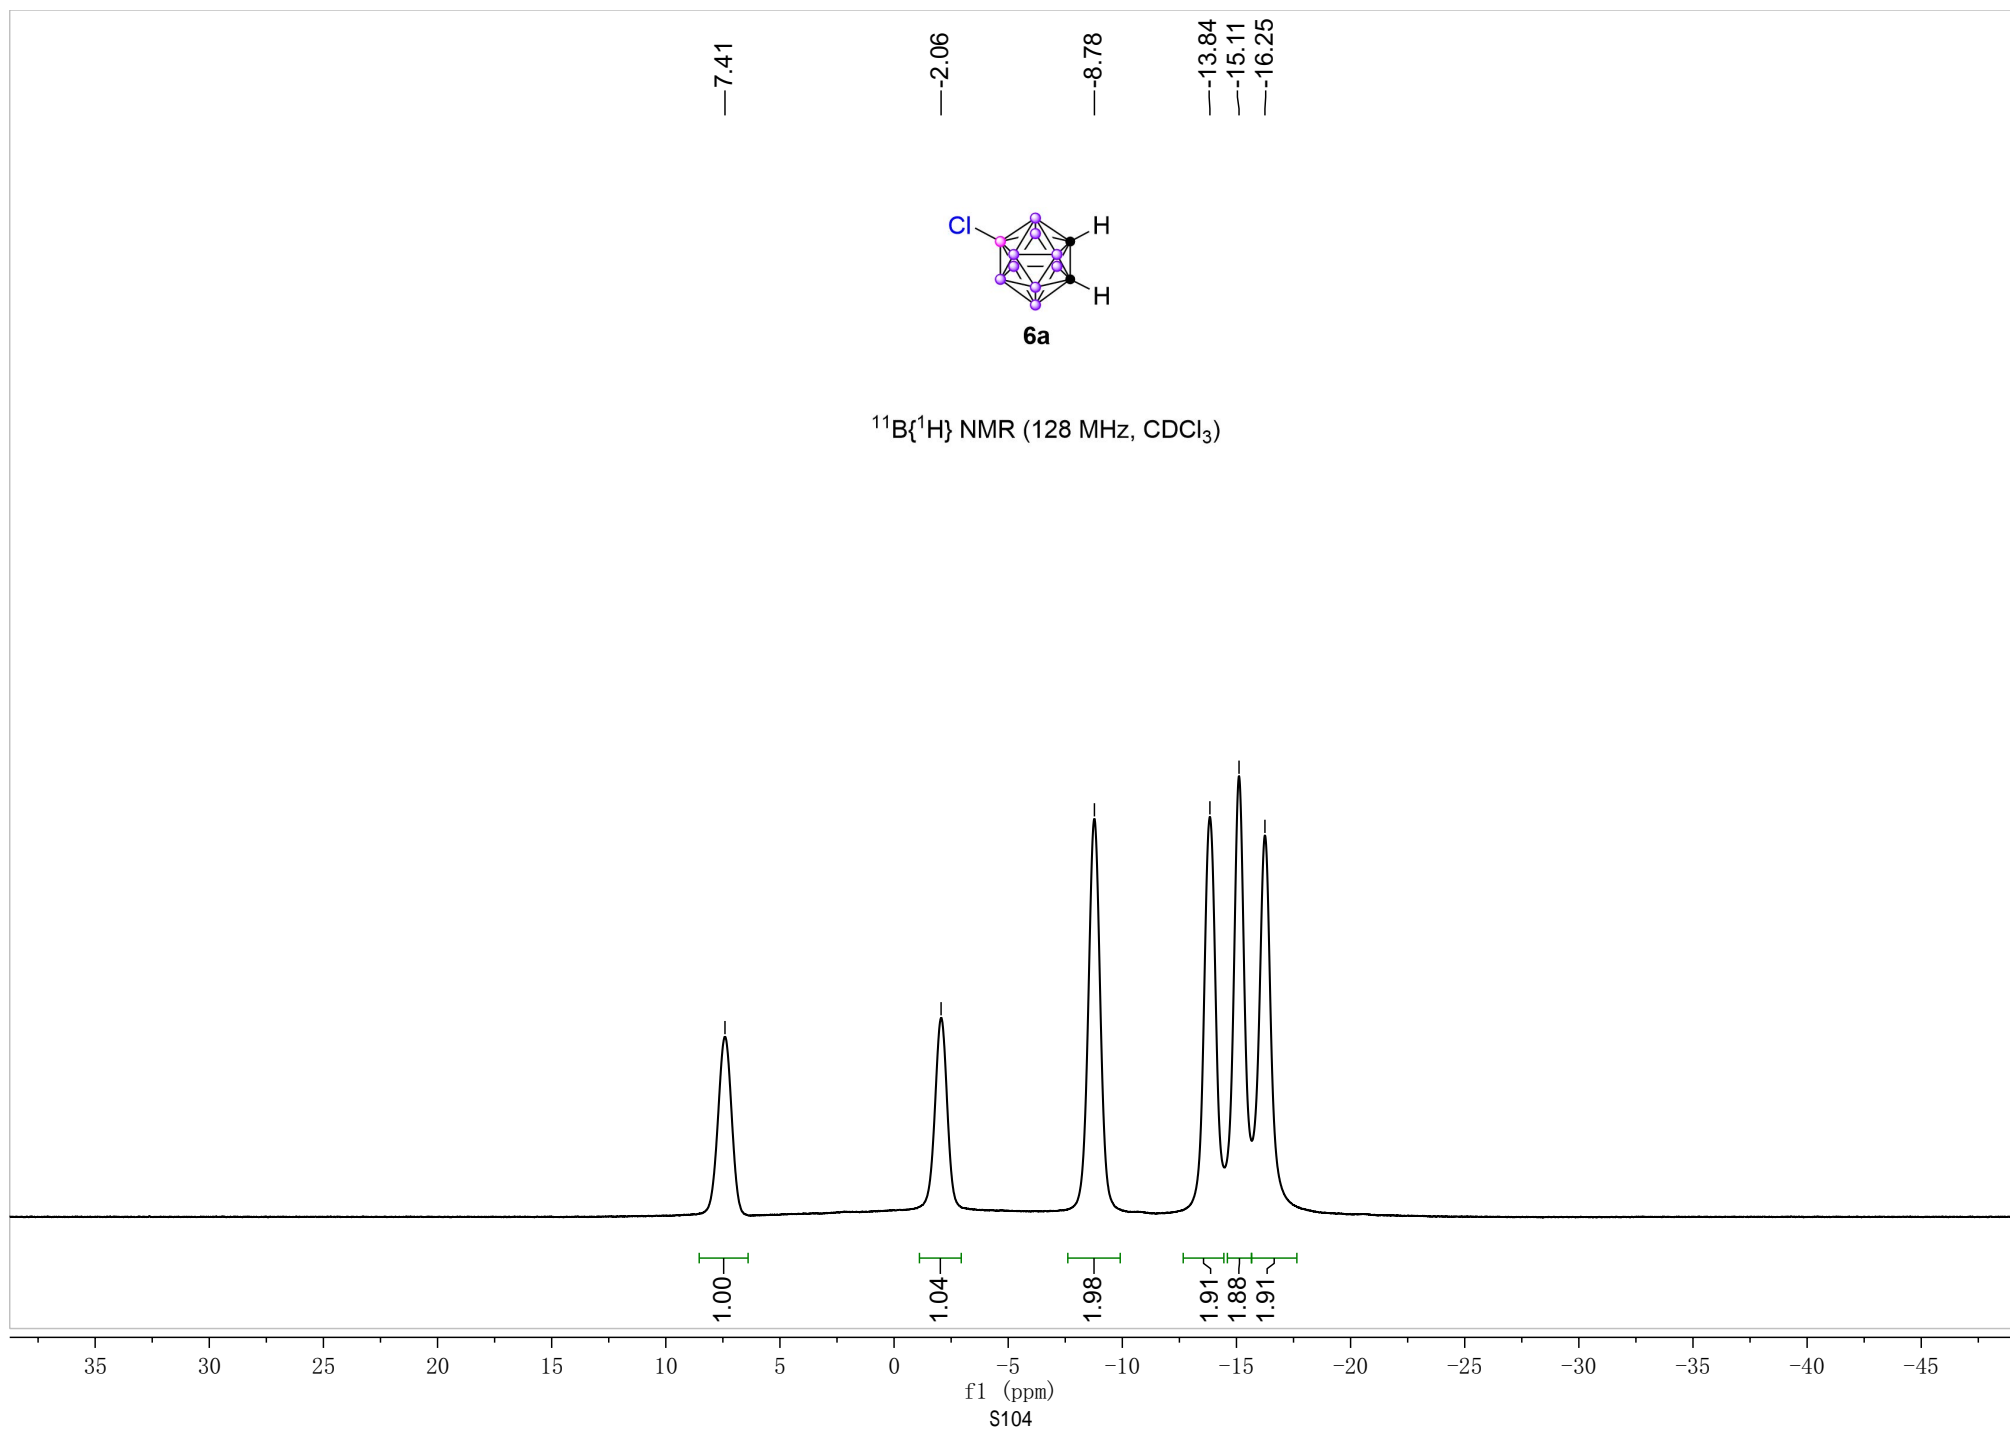

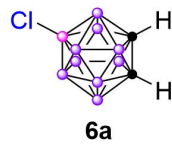

$^{13}\text{C}$  NMR (101 MHz,  $\text{CDCl}_3$ )

77.32  
77.00  
76.68

52.10

44.39

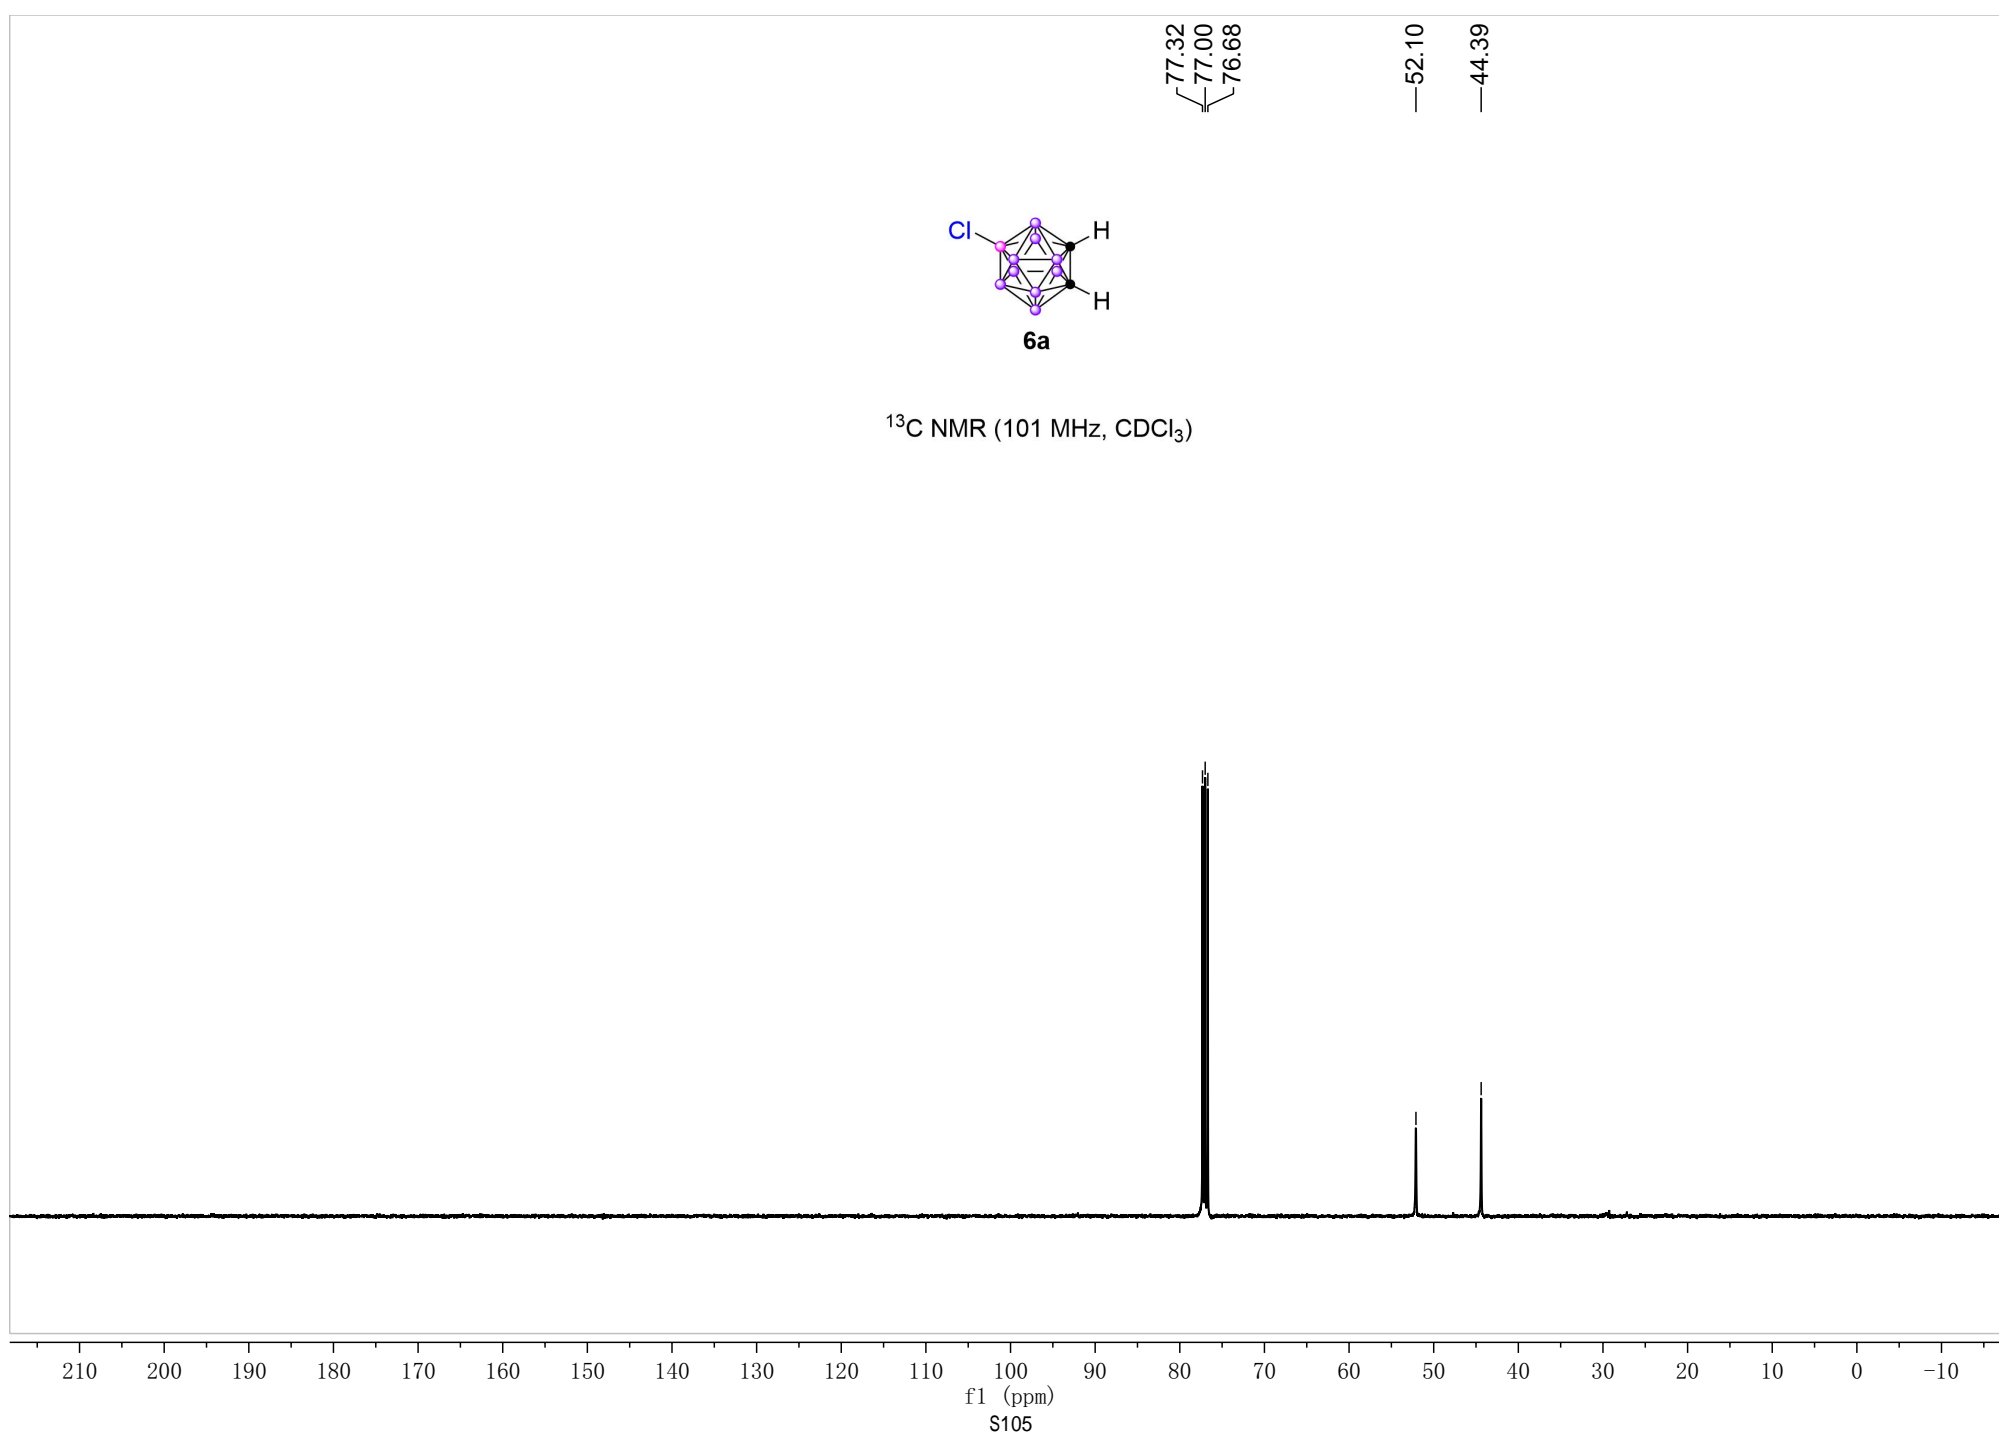

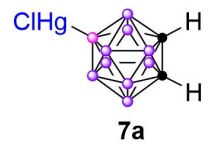

<sup>1</sup>H NMR (400 MHz, CDCl<sub>3</sub>)

—7.26

—3.74  
—3.54

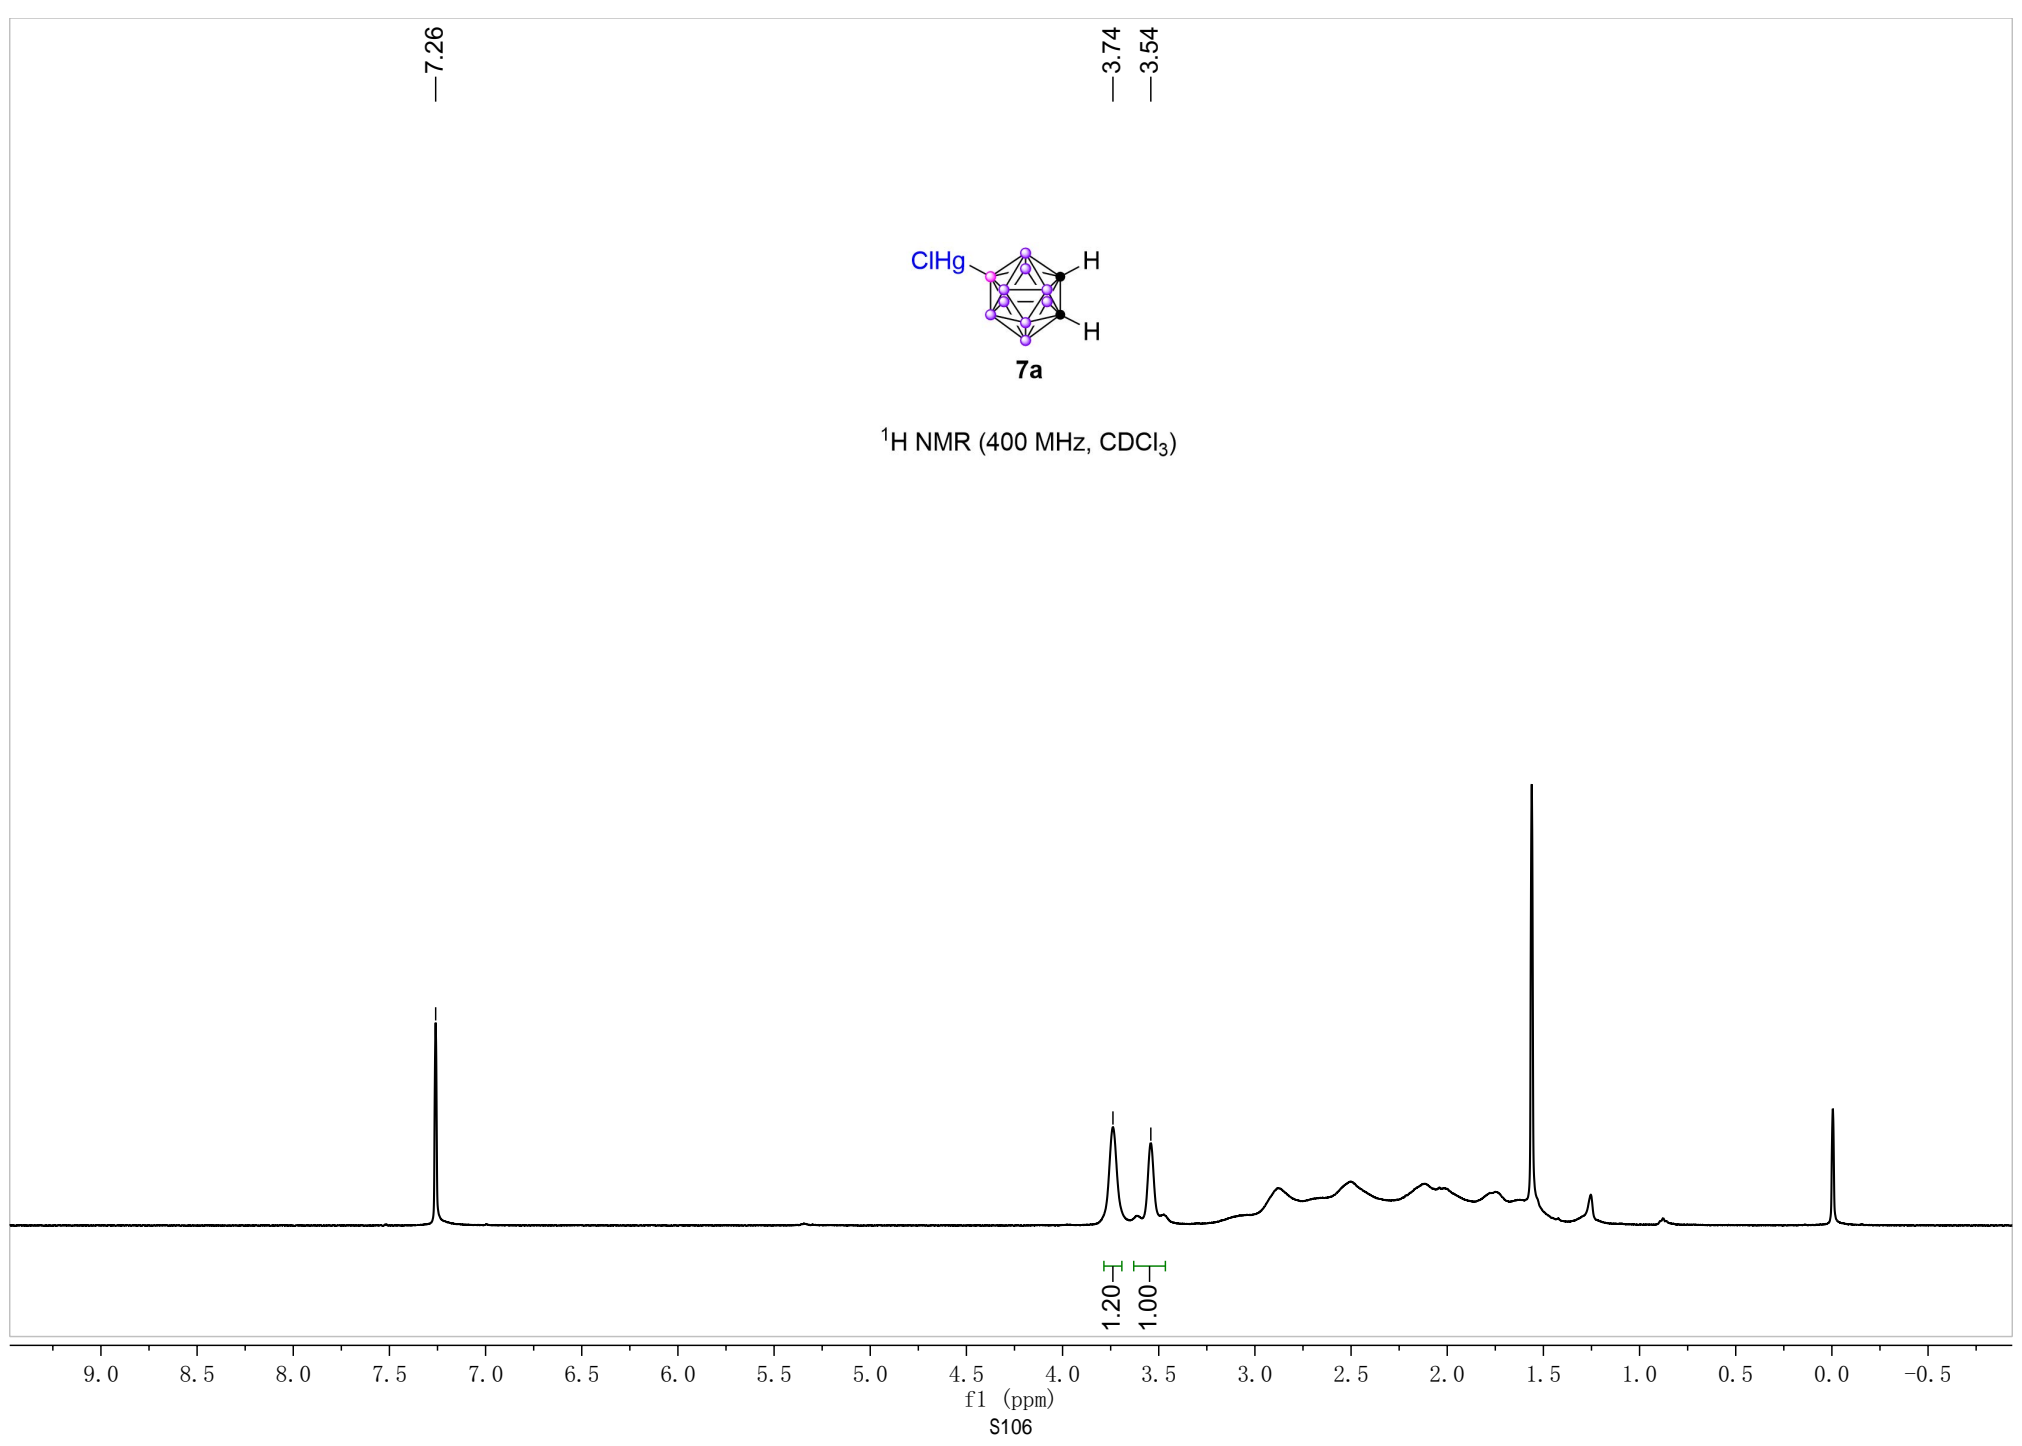



$^1\text{H}\{^{11}\text{B}\}$  NMR (400 MHz,  $\text{CDCl}_3$ )

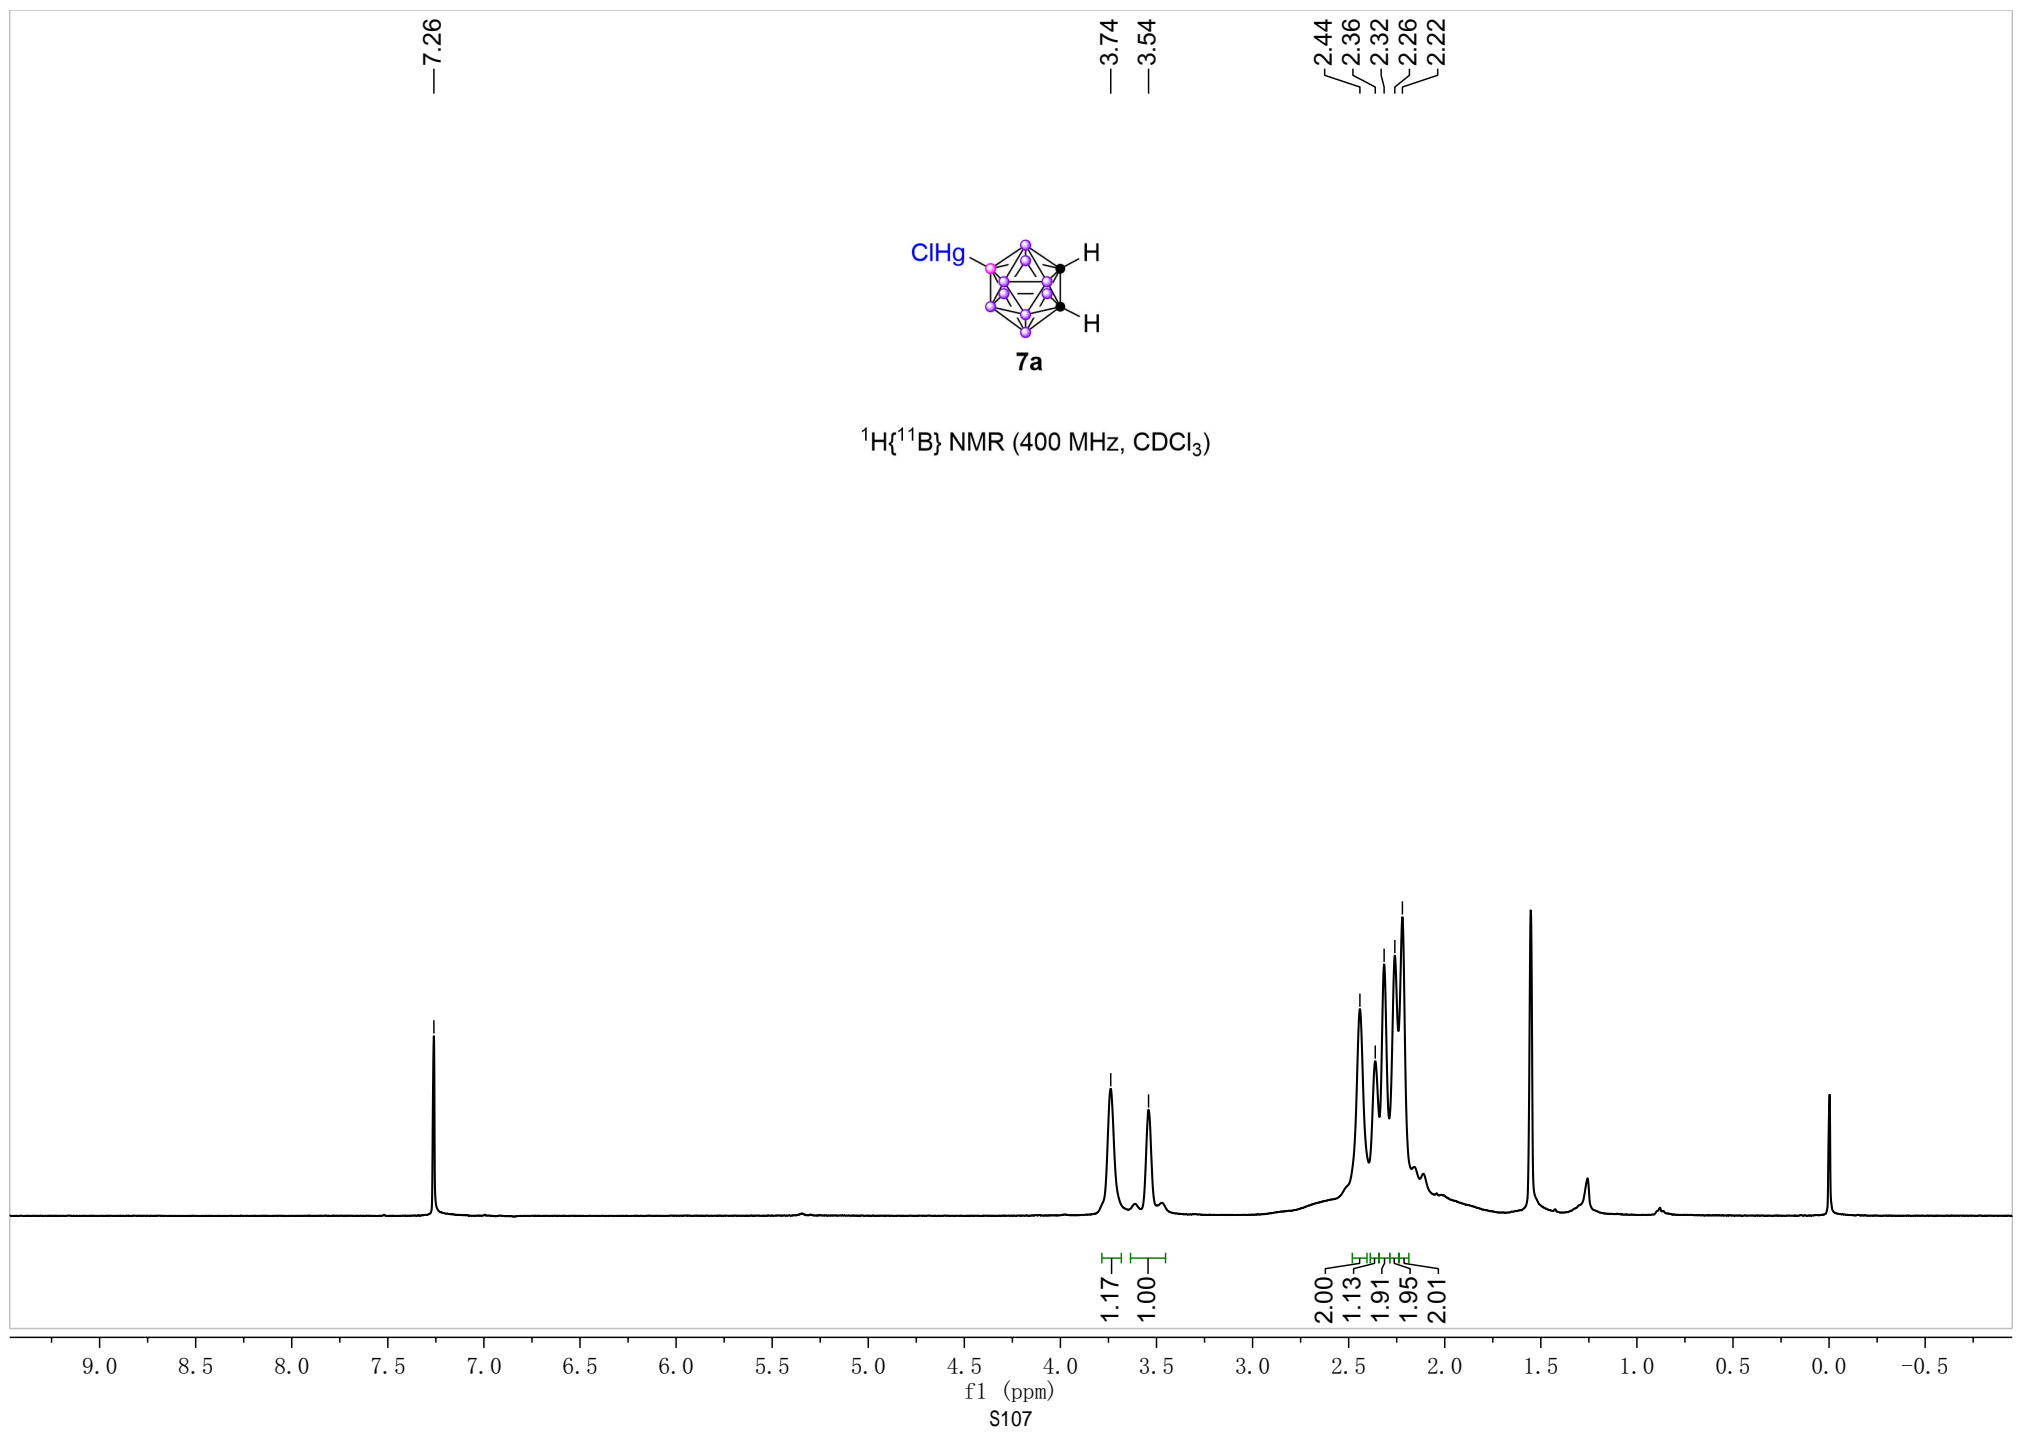

— 3.48  
— 0.46  
— 1.63  
— 7.49  
— 8.65  
— 11.79  
— 13.04  
— 14.38



<sup>11</sup>B NMR (128 MHz, CDCl<sub>3</sub>)

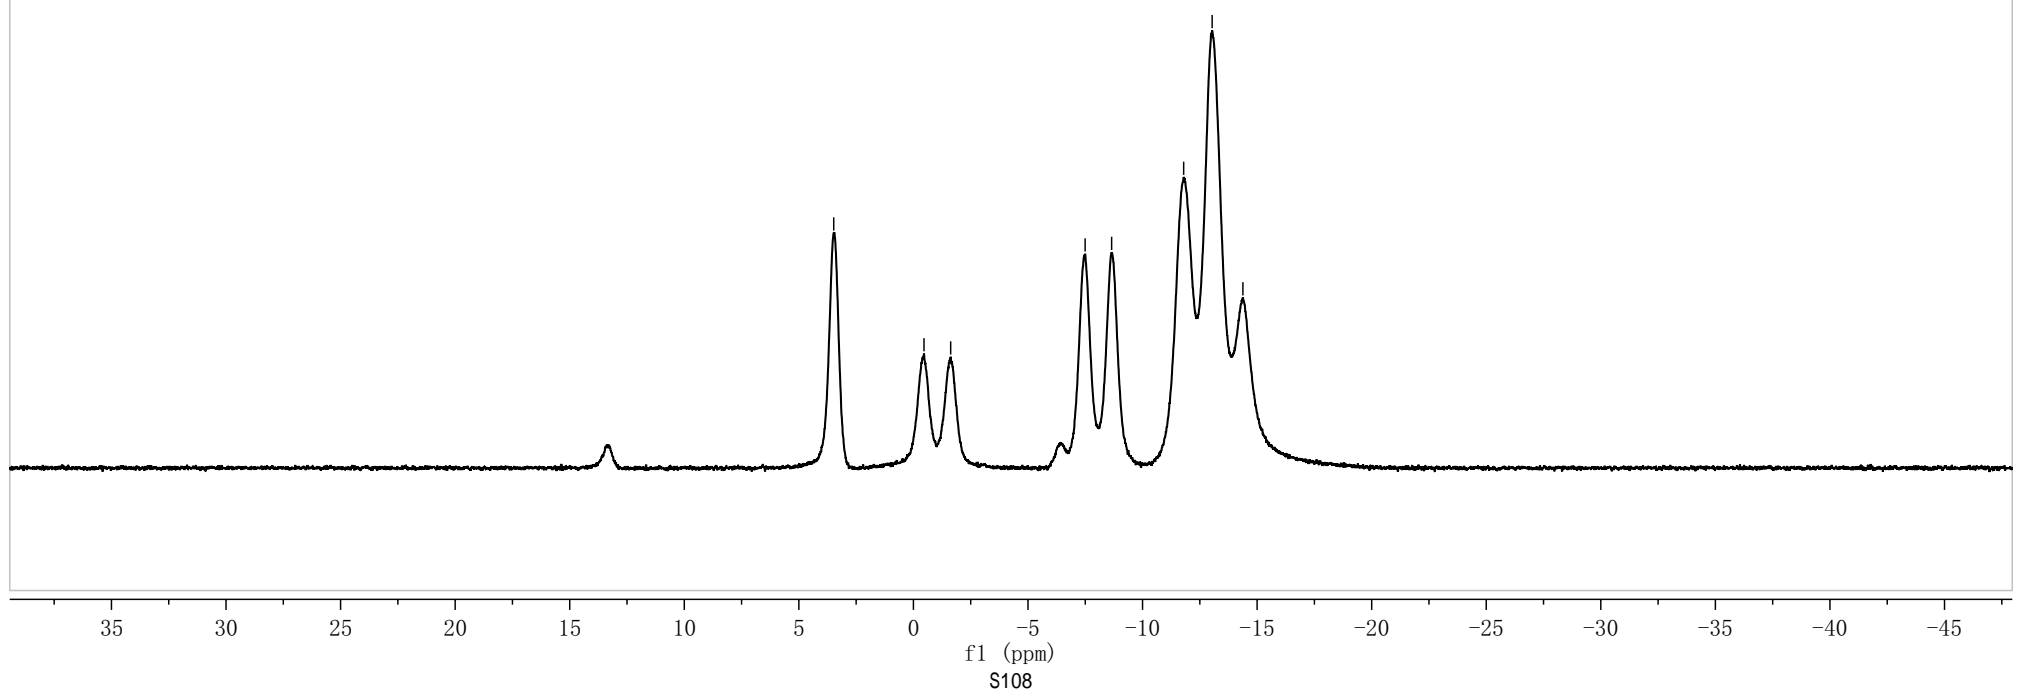



$^{11}\text{B}\{^1\text{H}\}$  NMR (128 MHz,  $\text{CDCl}_3$ )

—3.45  
—-1.03  
—-8.07  
—-12.47  
—-13.68

1.00  
1.13  
2.20  
4.17  
2.38

f1 (ppm)  
S109

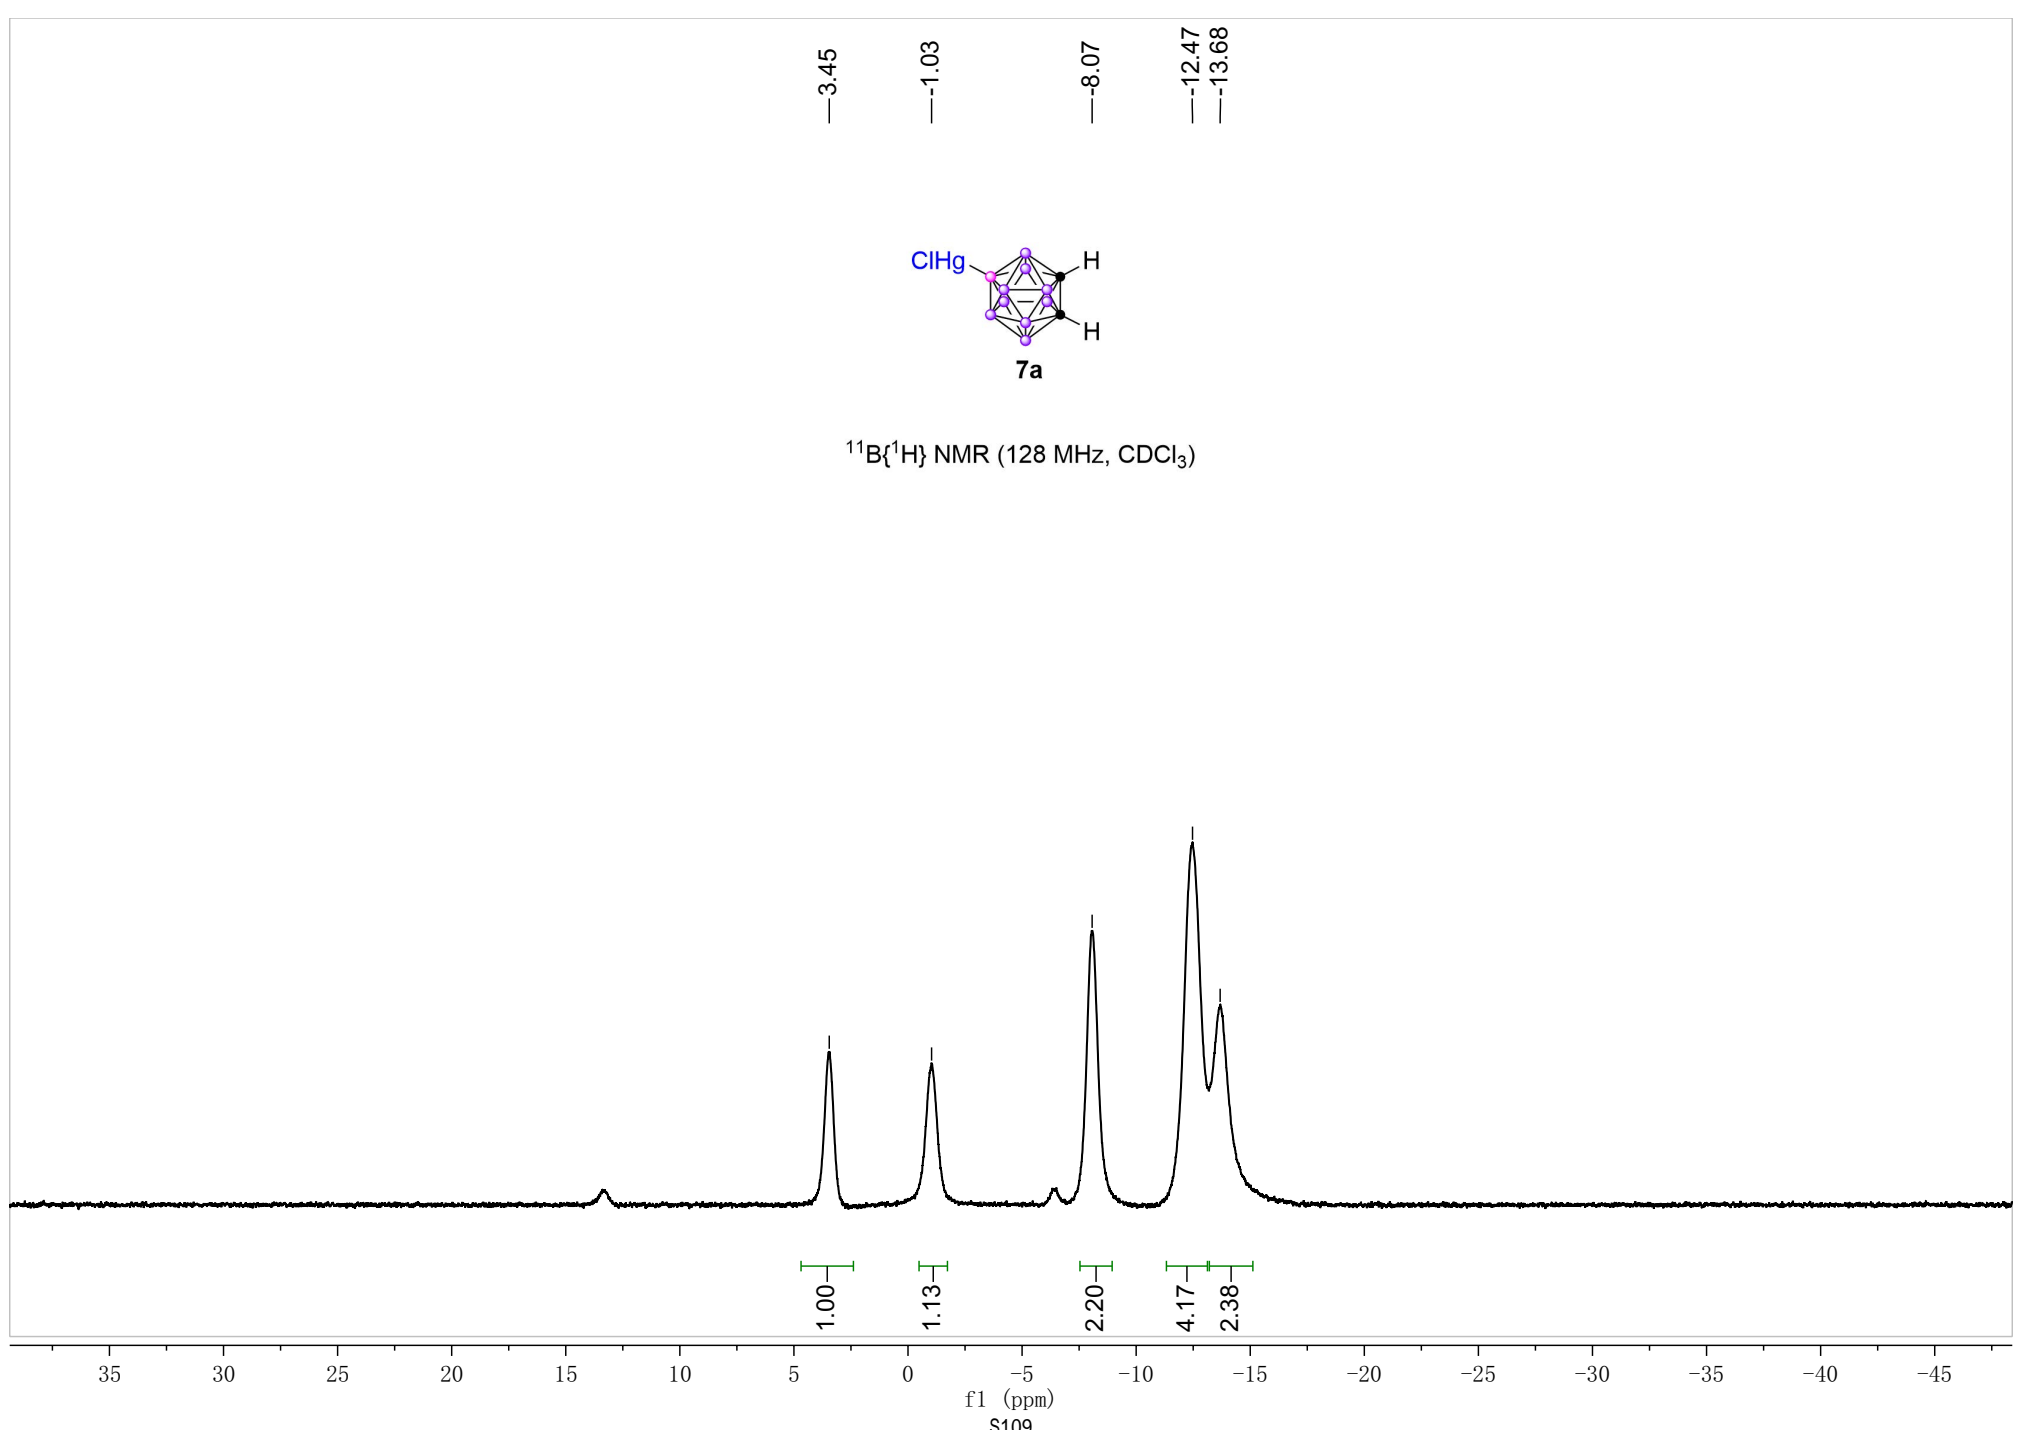



<sup>13</sup>C NMR (101 MHz, CDCl<sub>3</sub>)

77.32  
77.00  
76.68  
58.91  
57.00

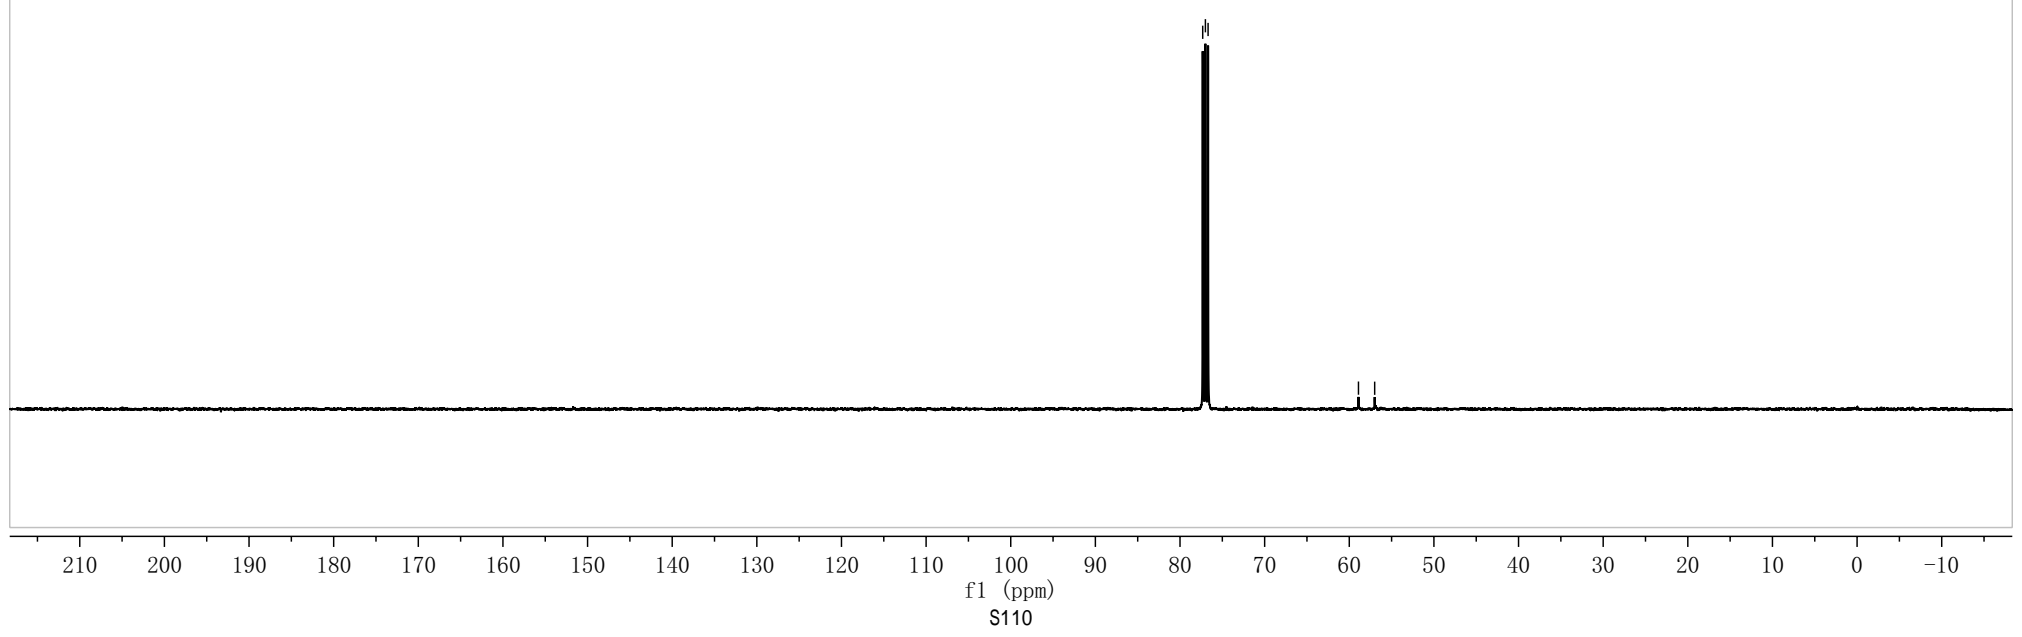



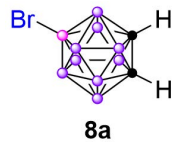

$^1\text{H}$  NMR (400 MHz,  $\text{CDCl}_3$ )

—7.26

—3.62

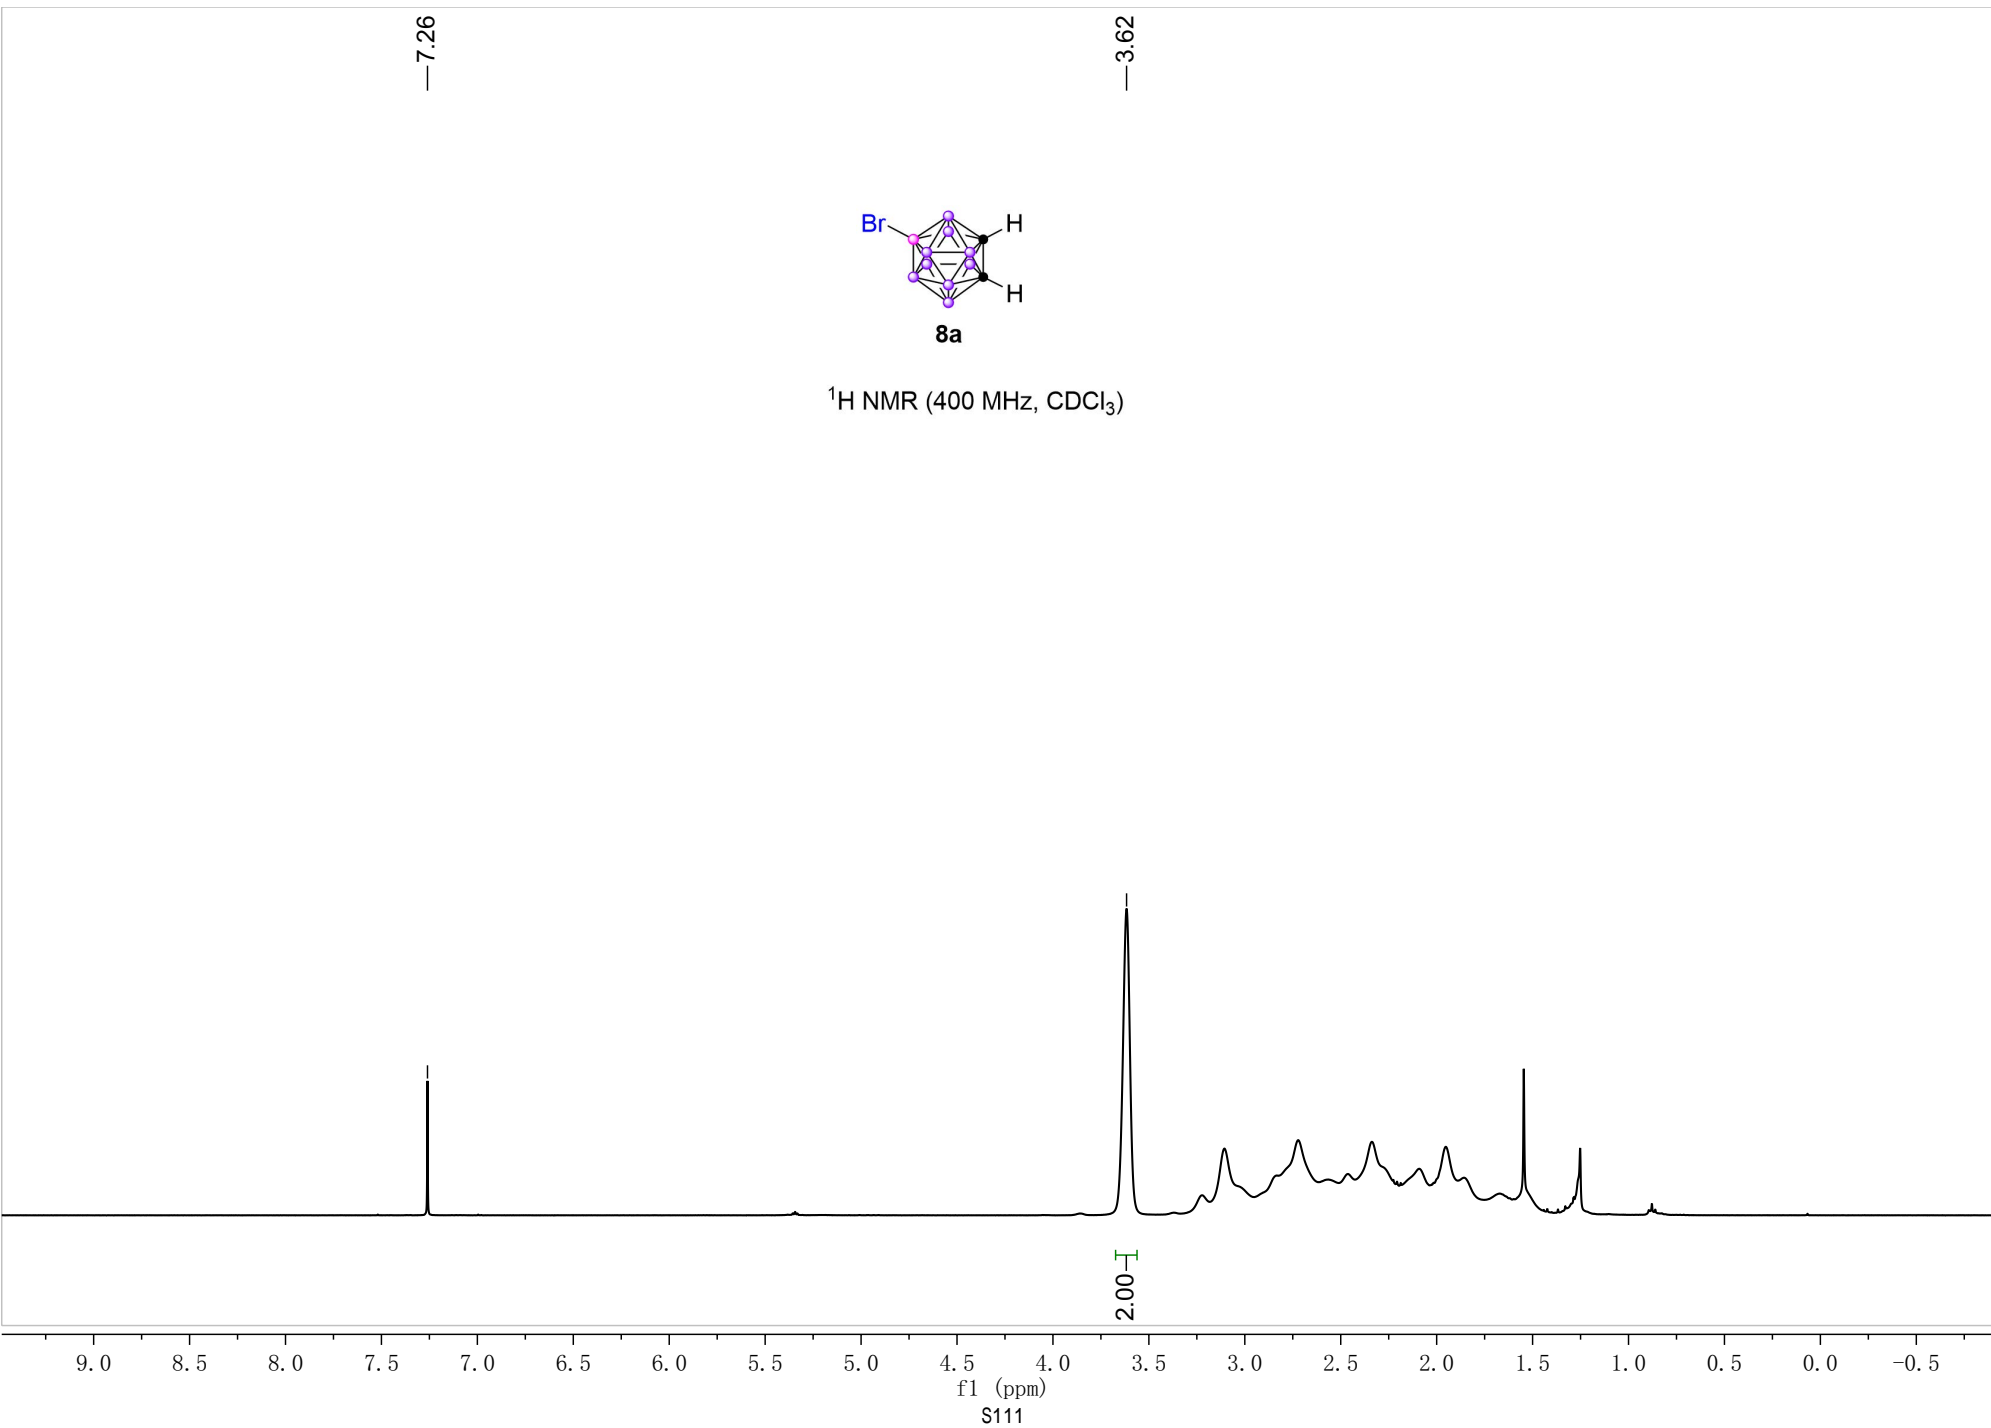



$^1\text{H}\{^{11}\text{B}\}$  NMR (400 MHz,  $\text{CDCl}_3$ )

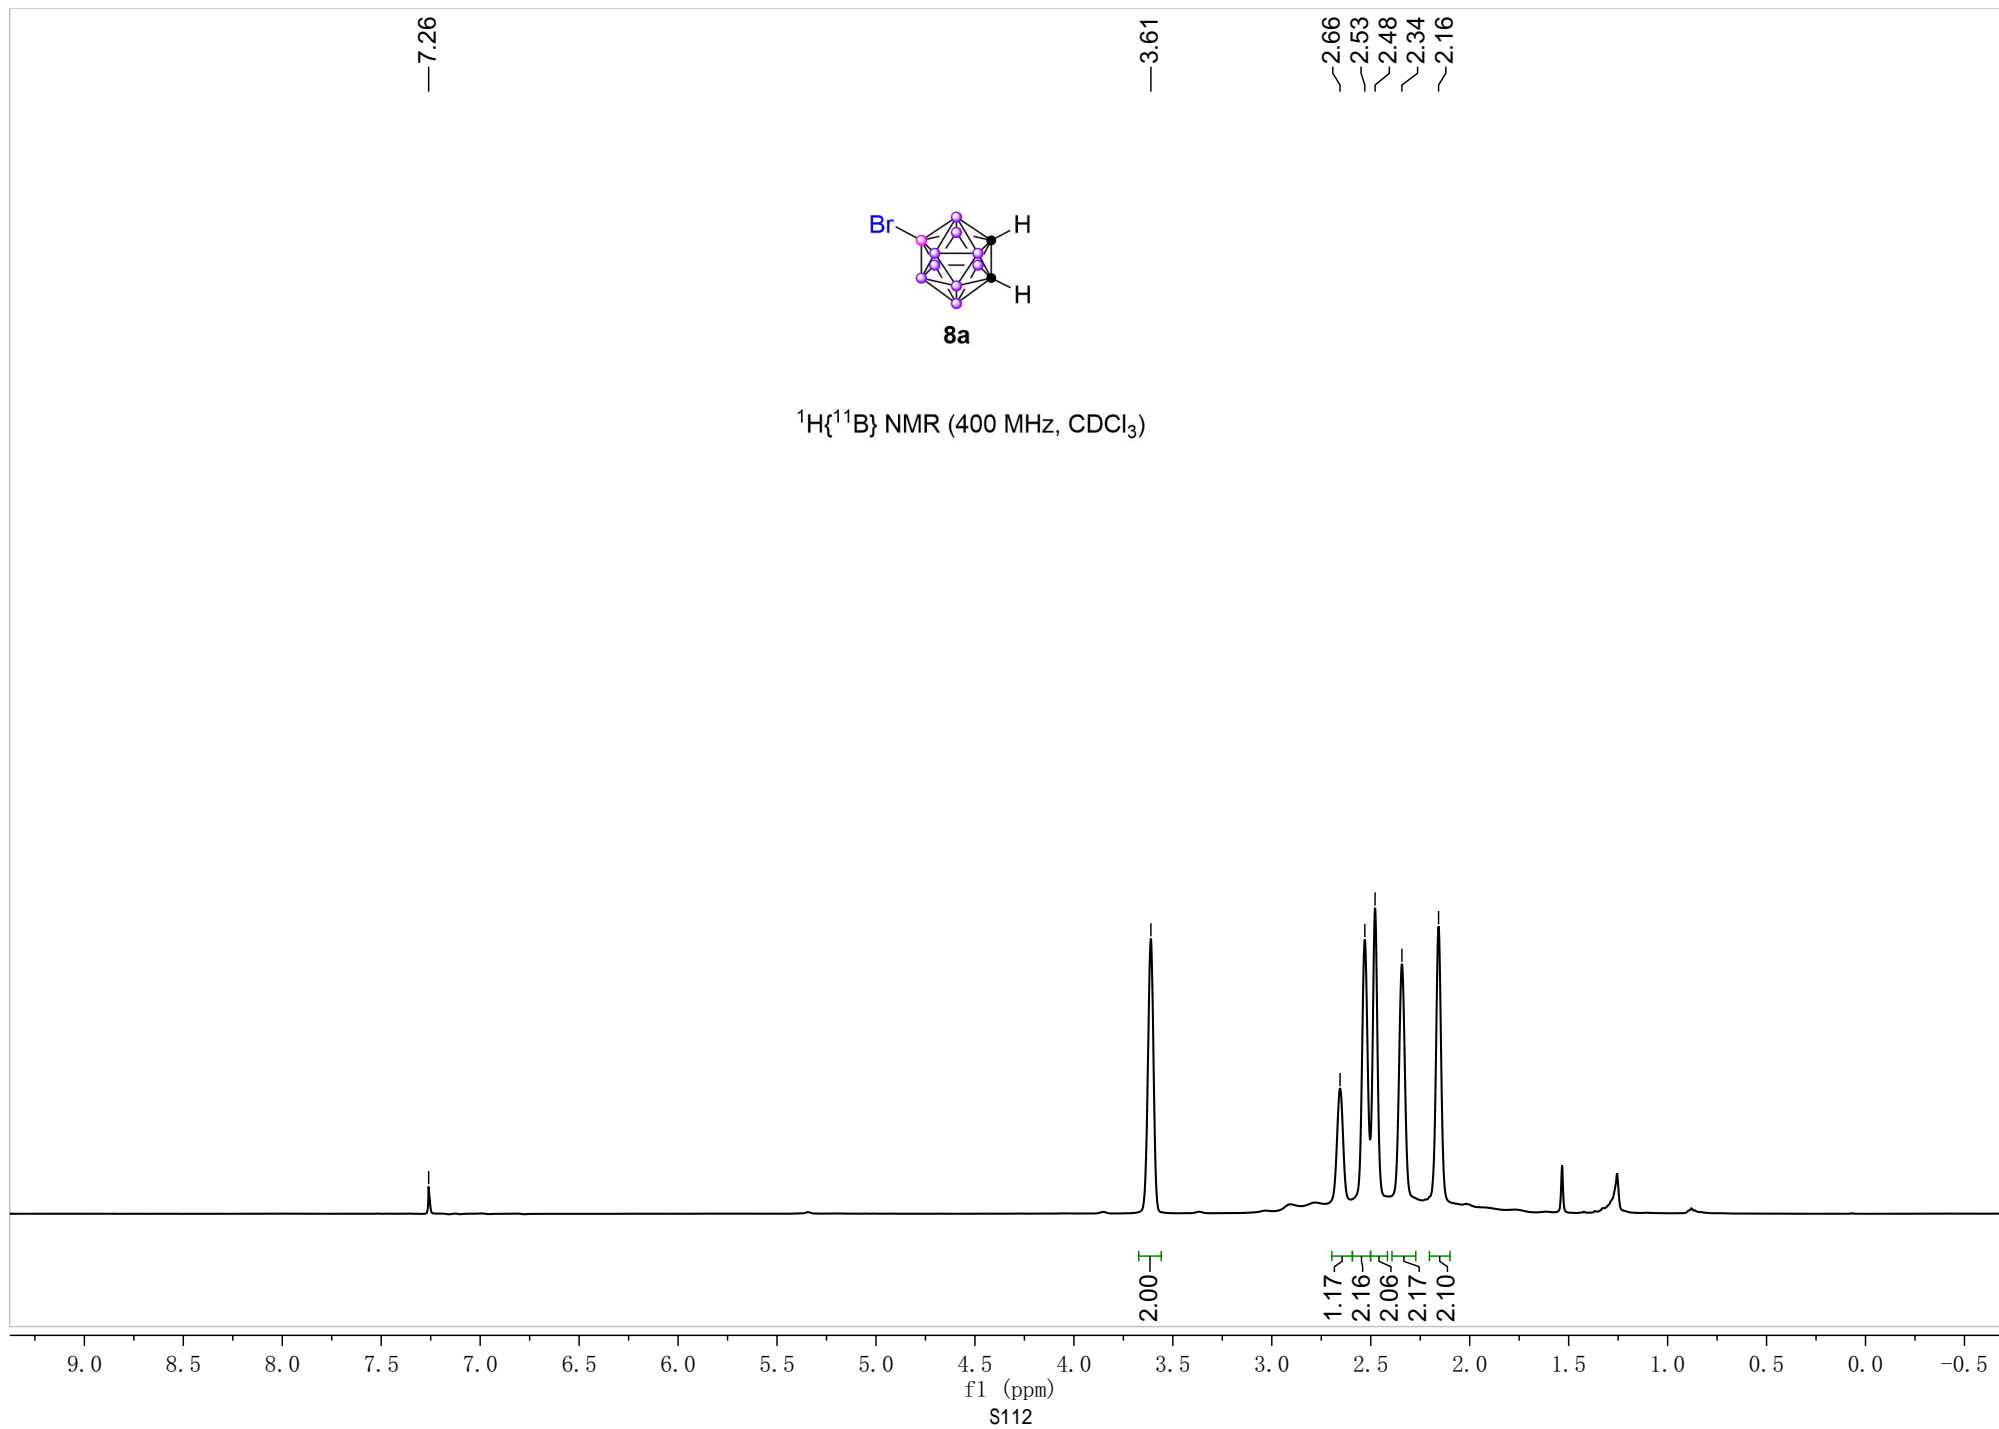

-0.09  
-1.03  
-2.24  
  
-7.71  
-8.91  
  
-12.85  
-13.96  
-15.05  
-16.38

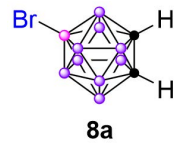

$^{11}\text{B}$  NMR (128 MHz,  $\text{CDCl}_3$ )

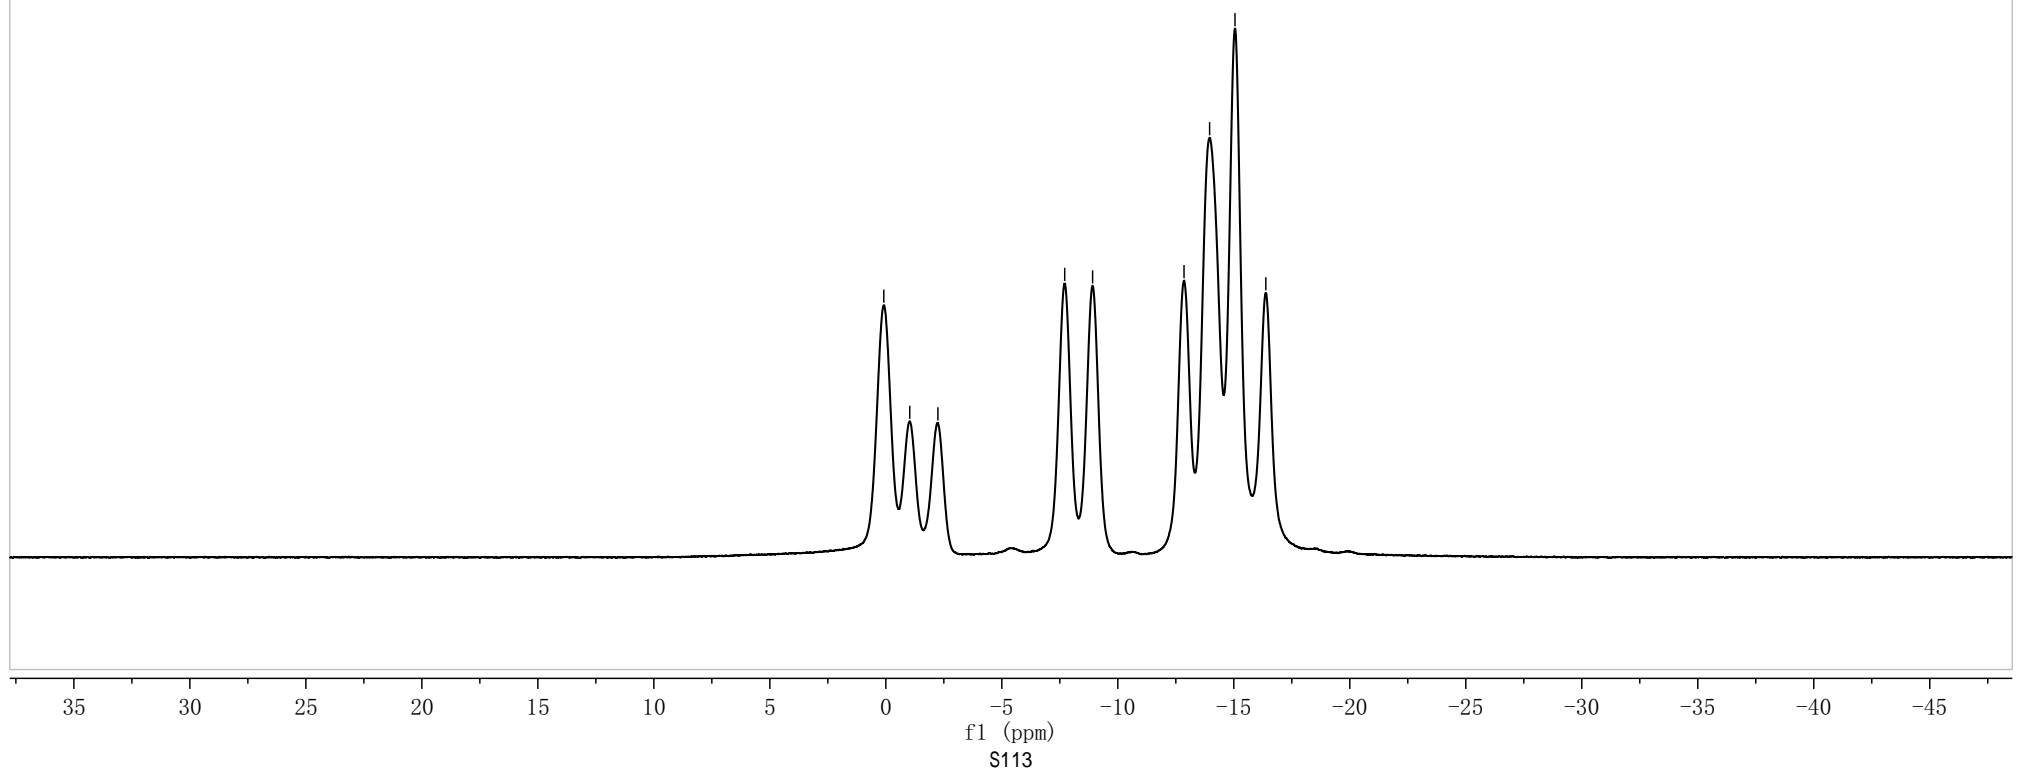

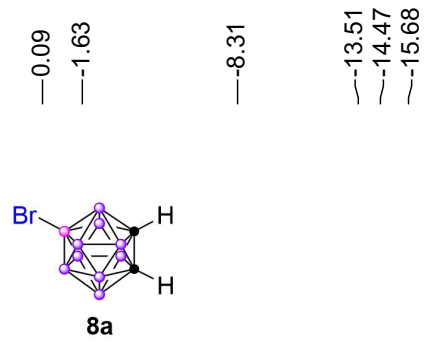

<sup>11</sup>B{<sup>1</sup>H} NMR (128 MHz, CDCl<sub>3</sub>)

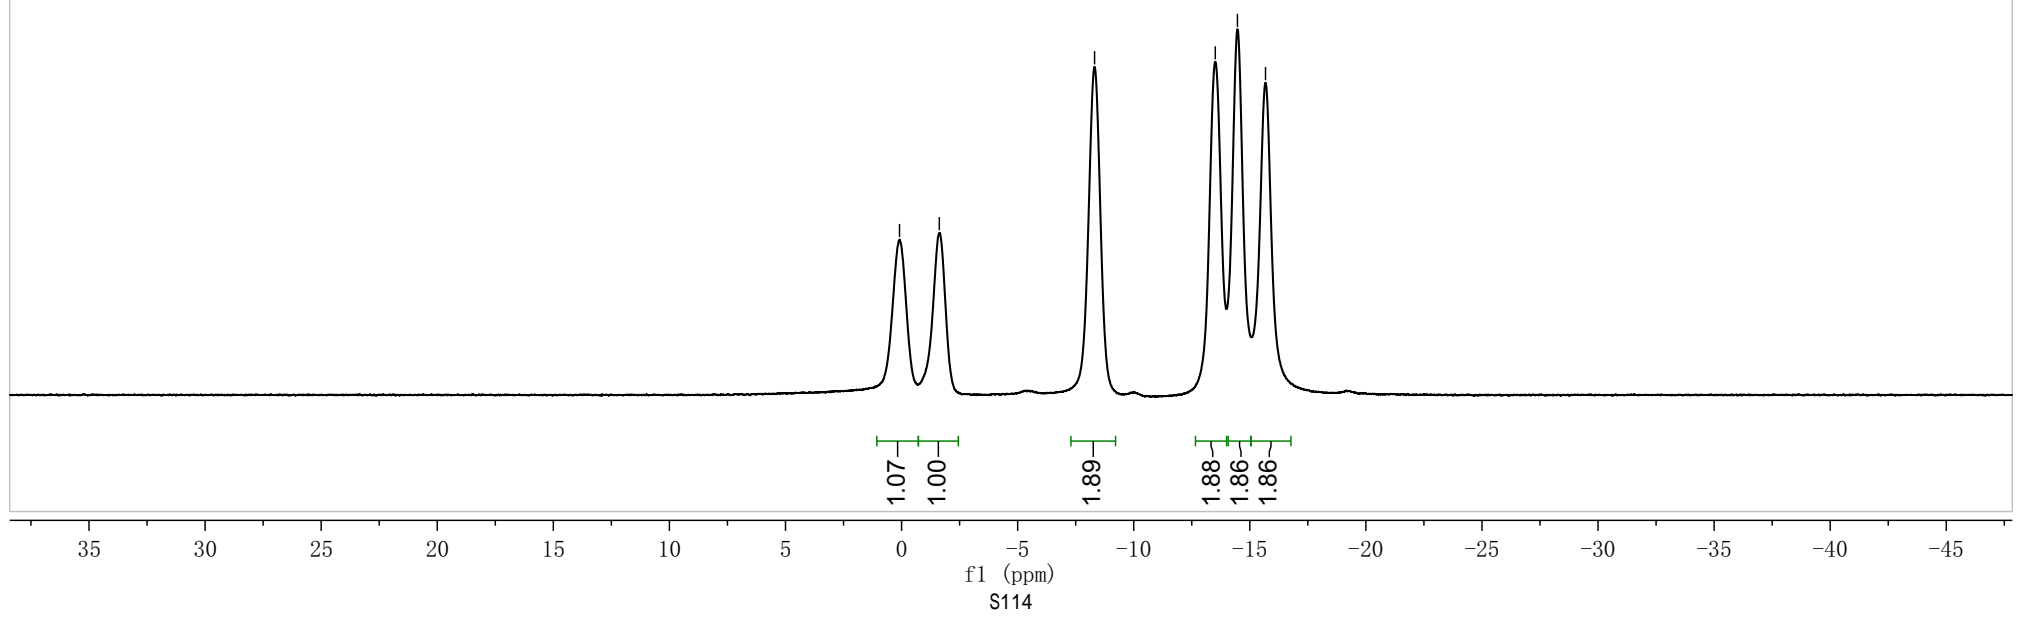

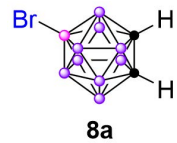

$^{13}\text{C}$  NMR (101 MHz,  $\text{CDCl}_3$ )

77.32  
77.00  
76.68

53.21  
46.72

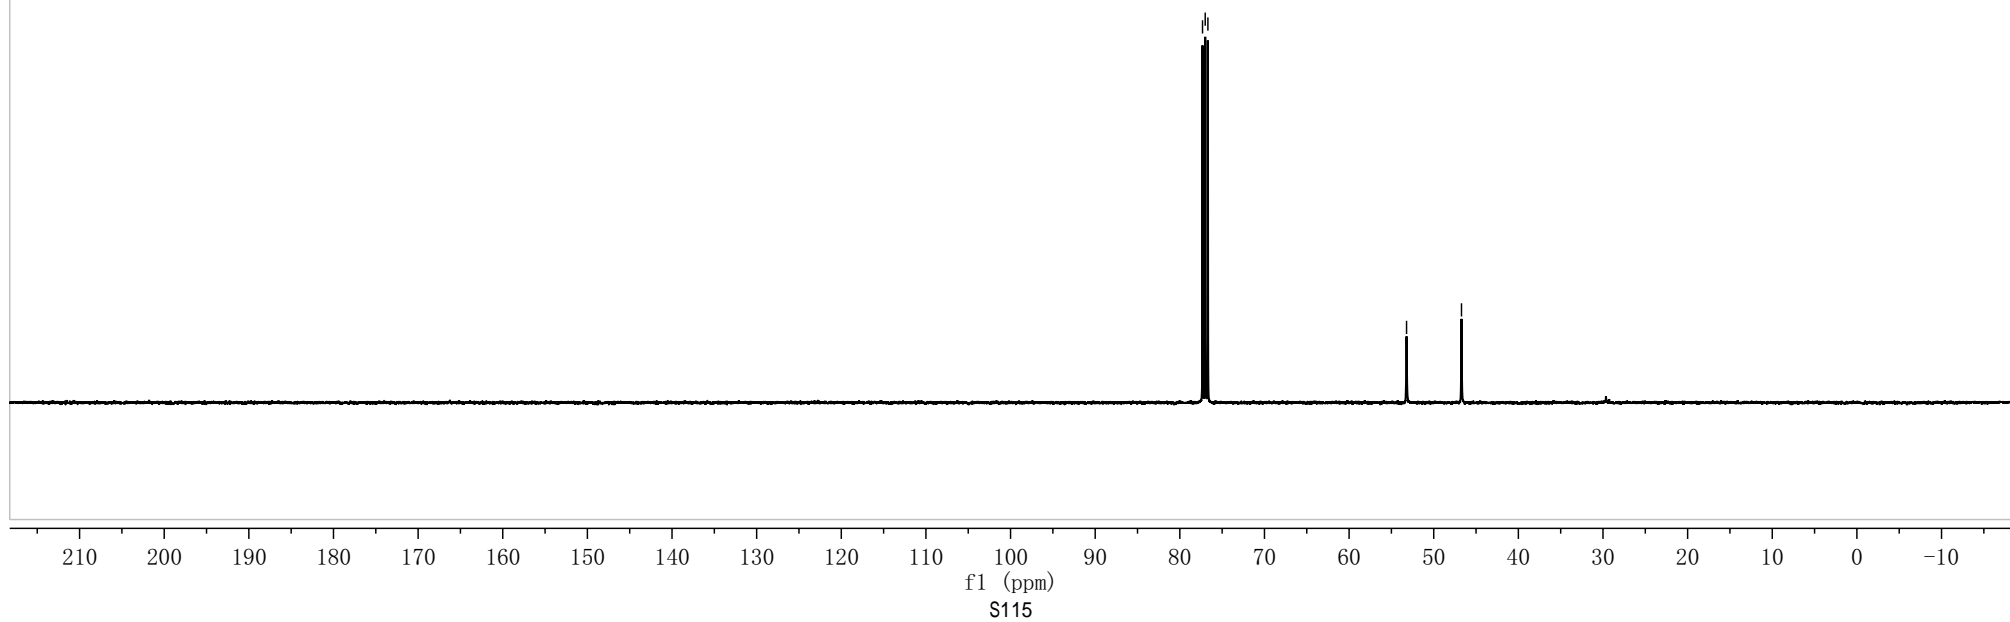

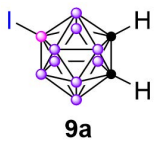

$^1\text{H}$  NMR (600 MHz,  $\text{CDCl}_3$ )

—7.26

—3.87

—3.66

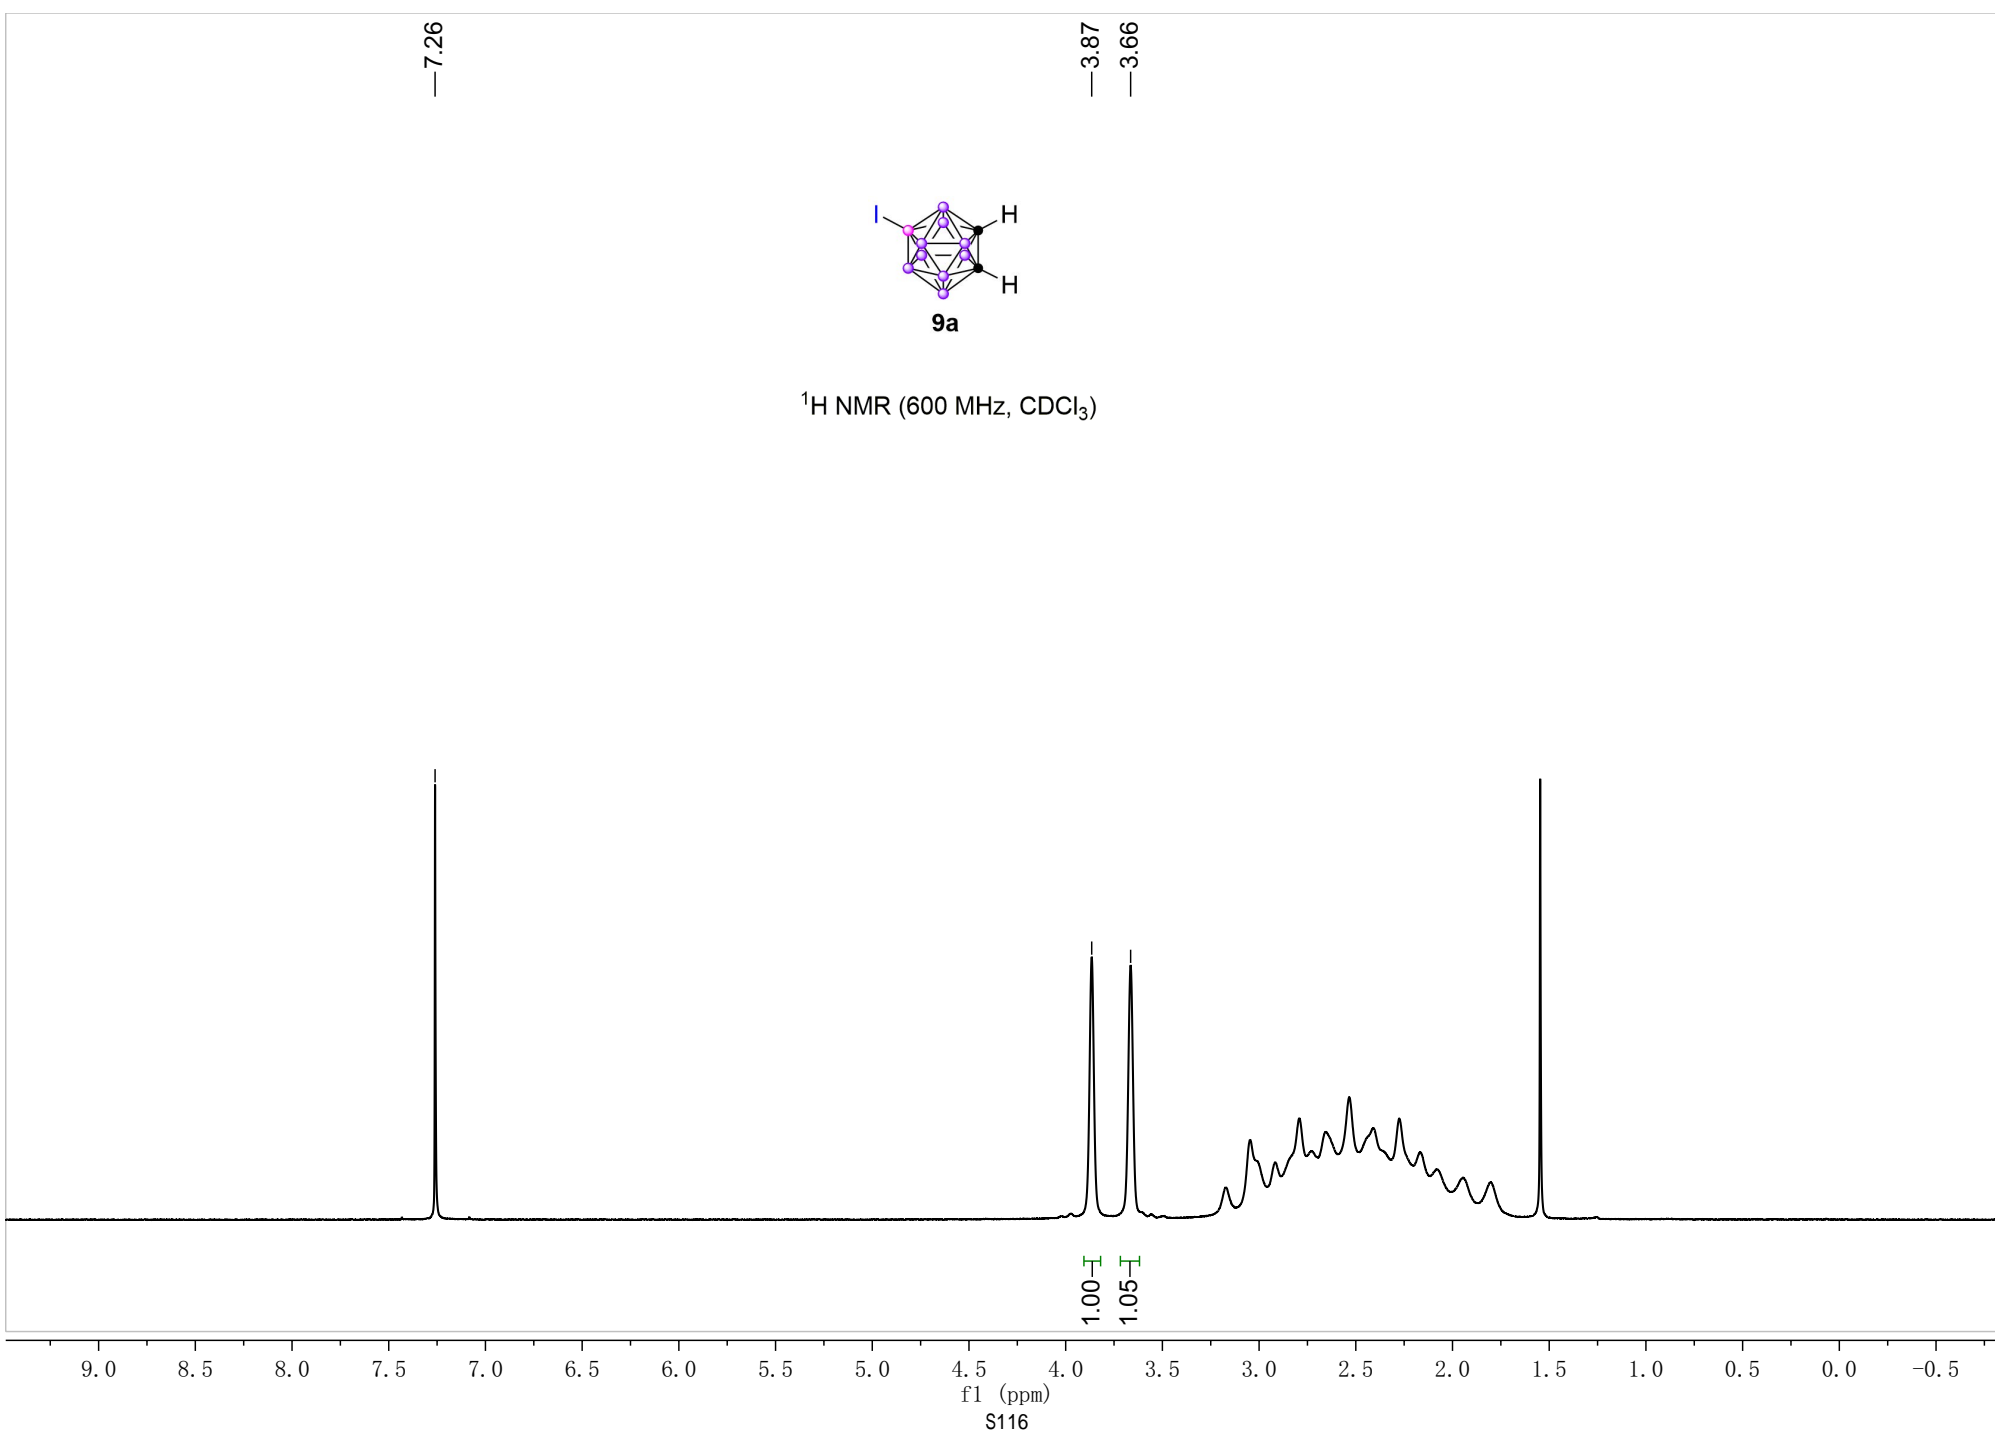



$^1\text{H}\{^1\text{B}\}$  NMR (600 MHz,  $\text{CDCl}_3$ )

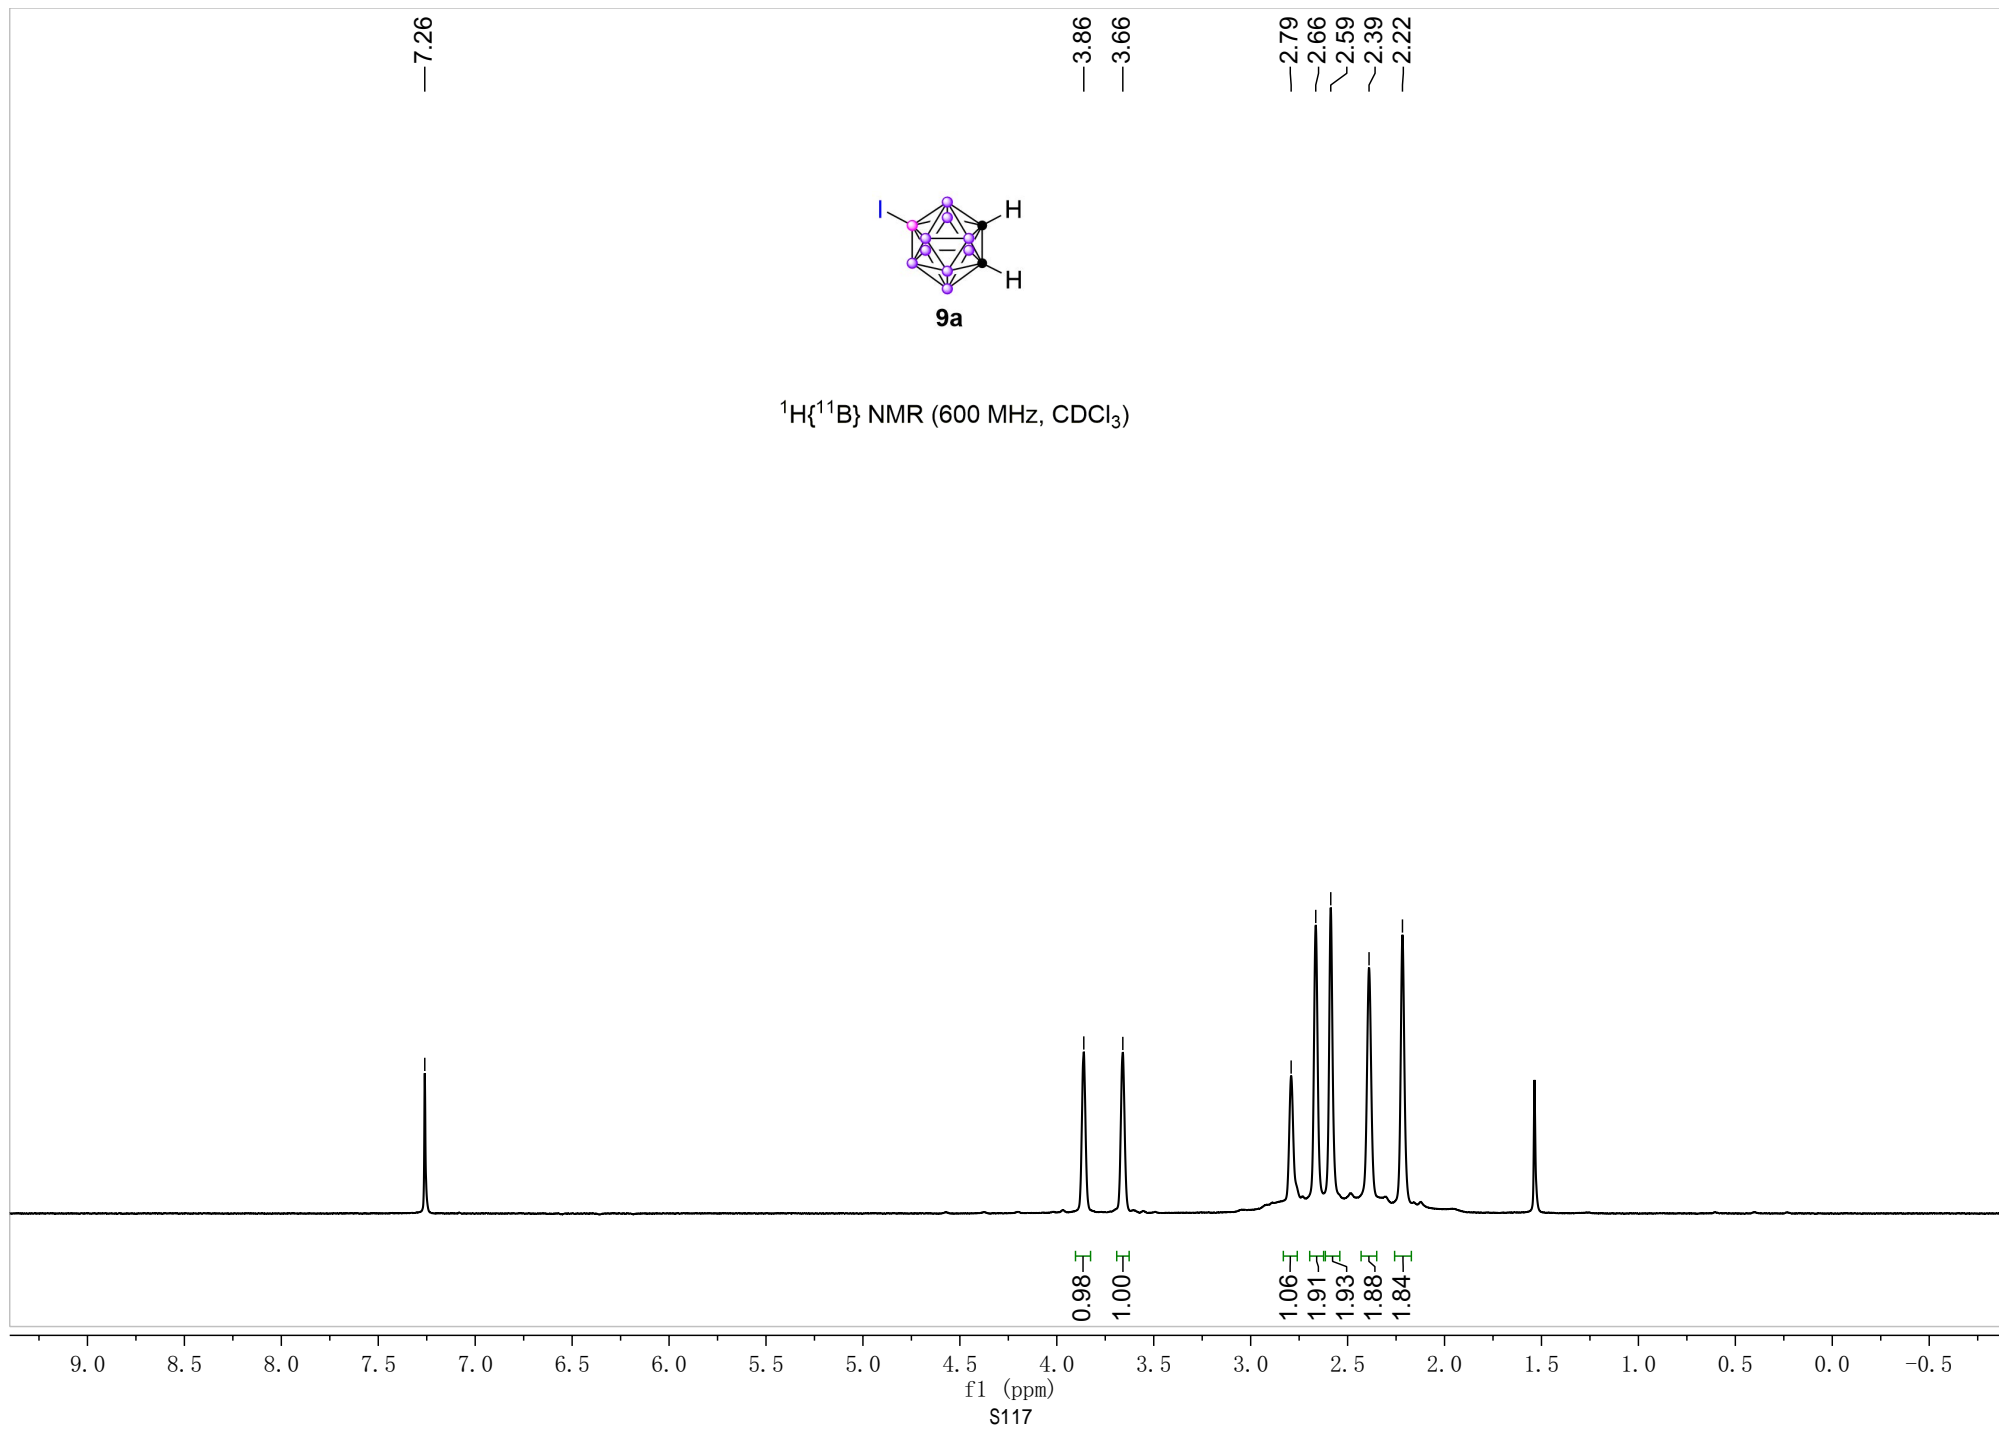

-0.46  
-1.26  
-7.05  
-7.87  
-12.36  
-13.11  
-13.89  
-14.25  
-15.22  
-16.59

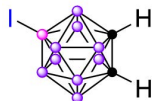

9a

$^{11}\text{B}$  NMR (193 MHz,  $\text{CDCl}_3$ )

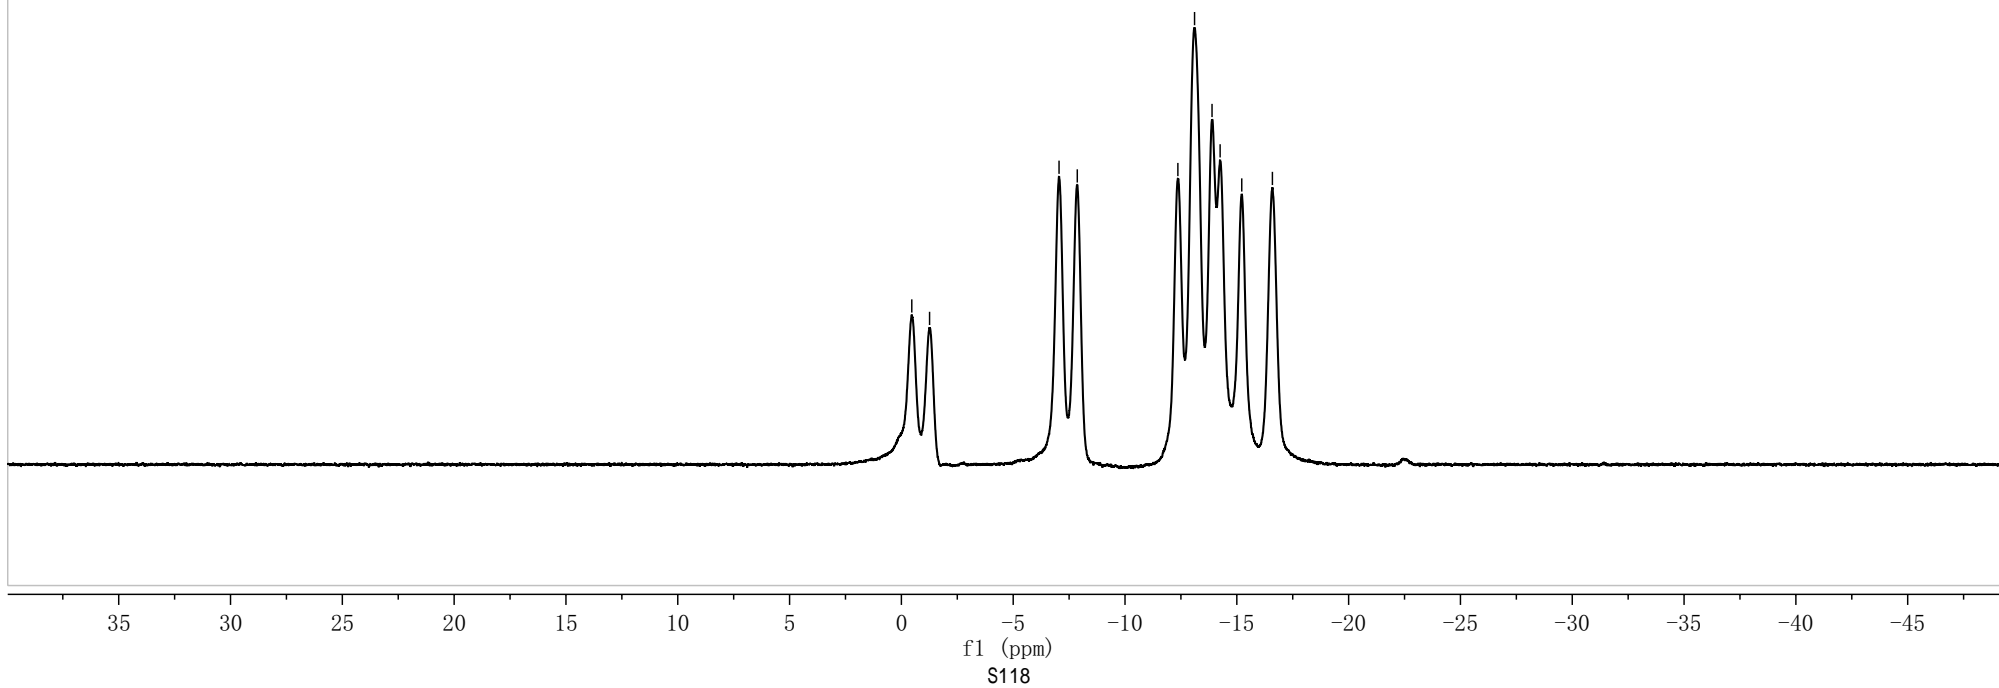



---0.87  
---7.45  
---12.80  
---13.44  
---14.75  
---16.57

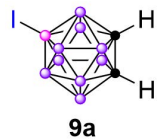

$^{11}\text{B}\{^1\text{H}\}$  NMR (193 MHz,  $\text{CDCl}_3$ )

1.08  
2.00  
1.97  
2.00  
2.03  
1.09

f1 (ppm)  
S119

35 30 25 20 15 10 5 0 -5 -10 -15 -20 -25 -30 -35 -40 -45

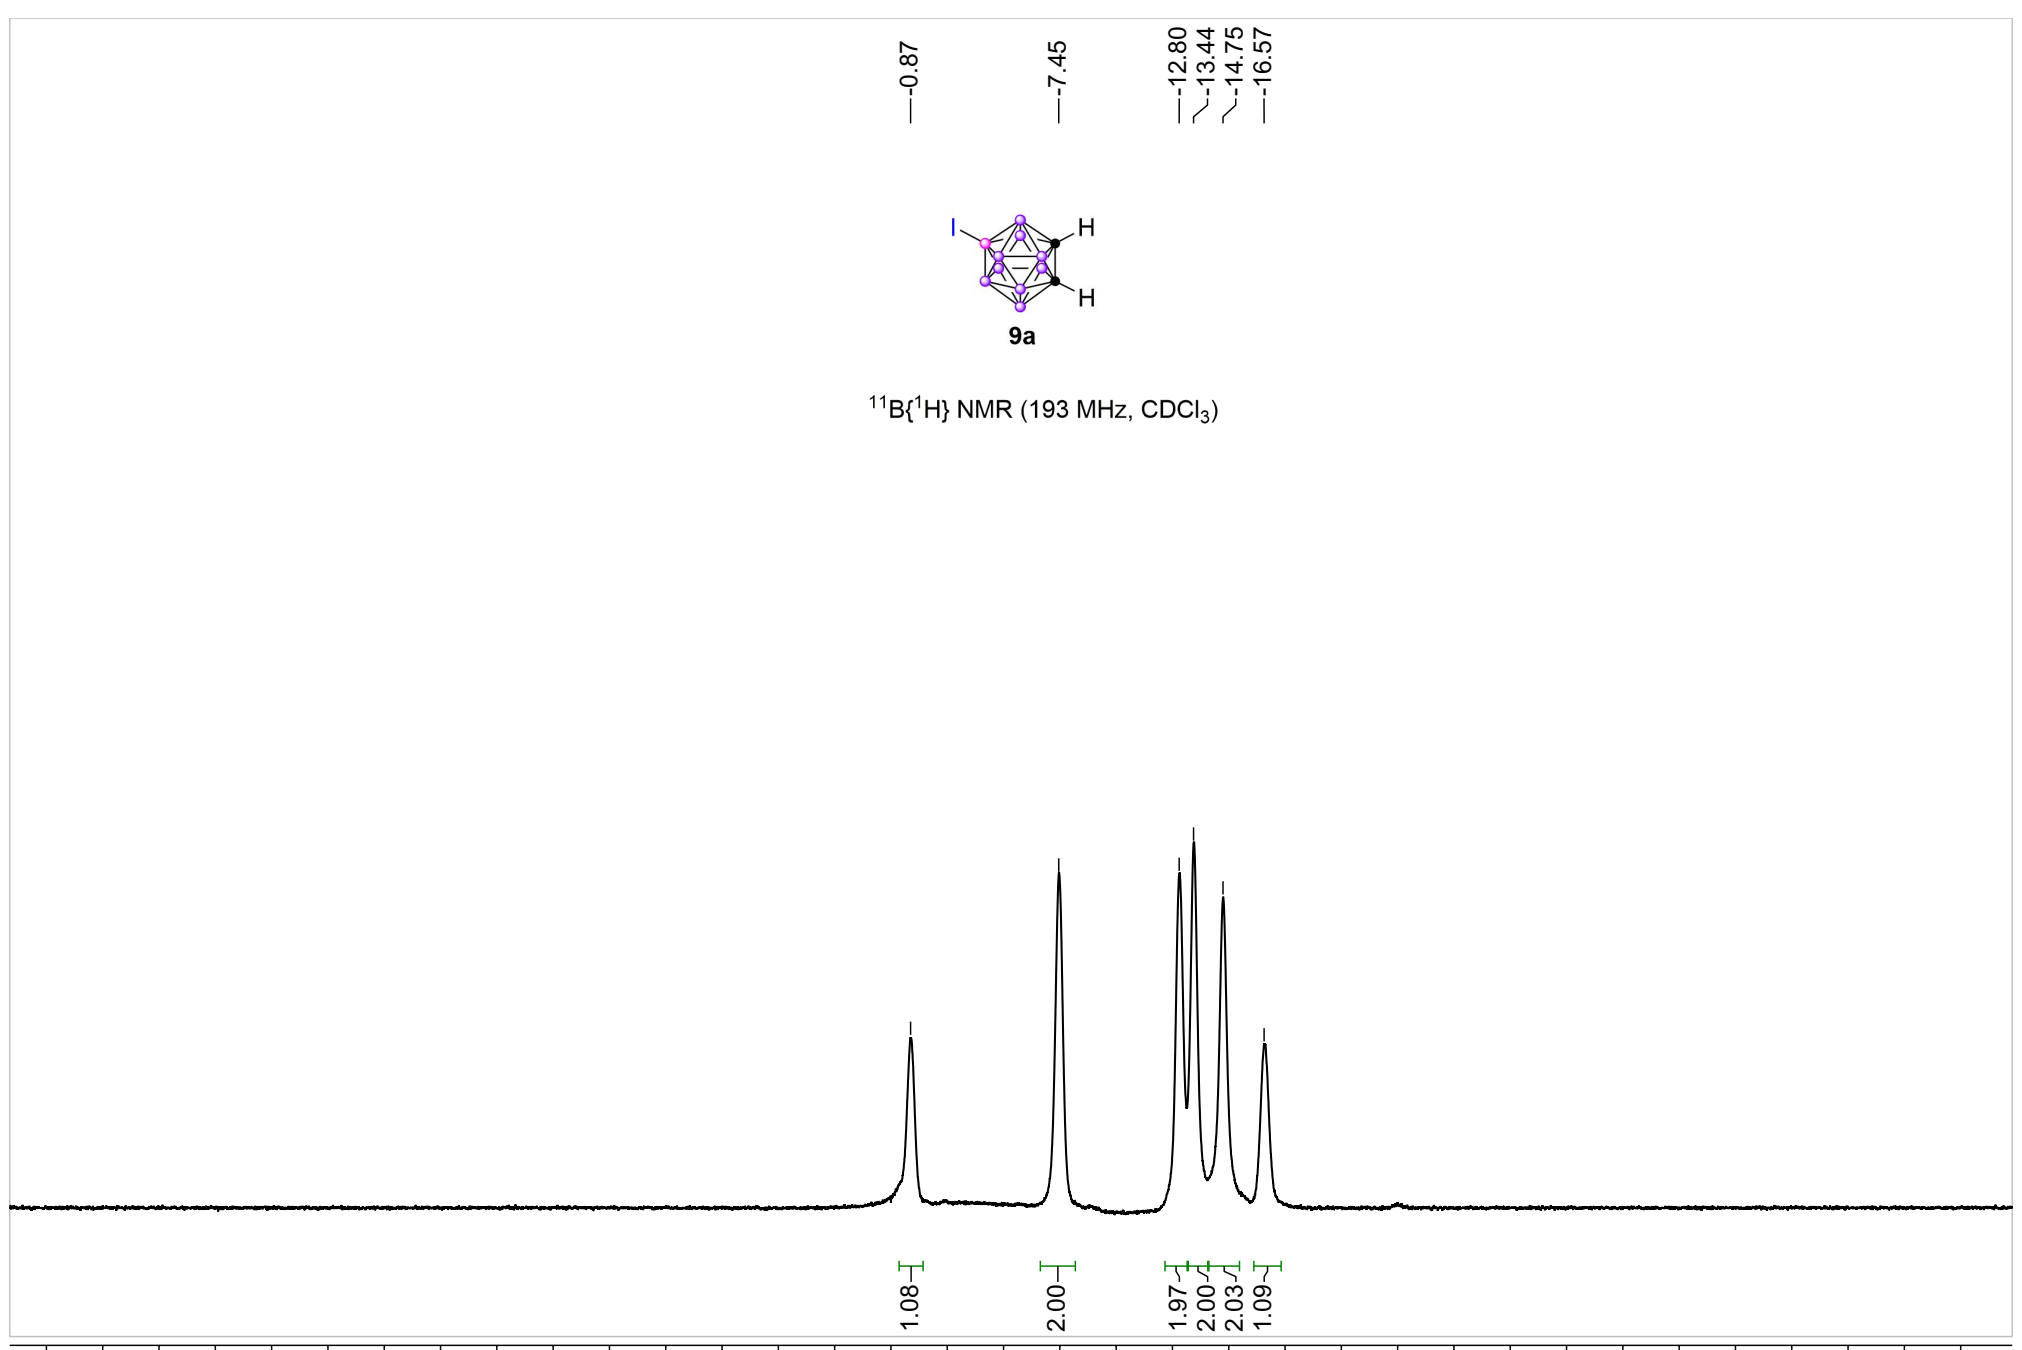

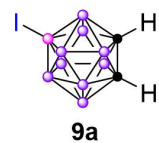

$^{13}\text{C}$  NMR (151 MHz,  $\text{CDCl}_3$ )

77.21  
77.00  
76.79

54.82  
50.67

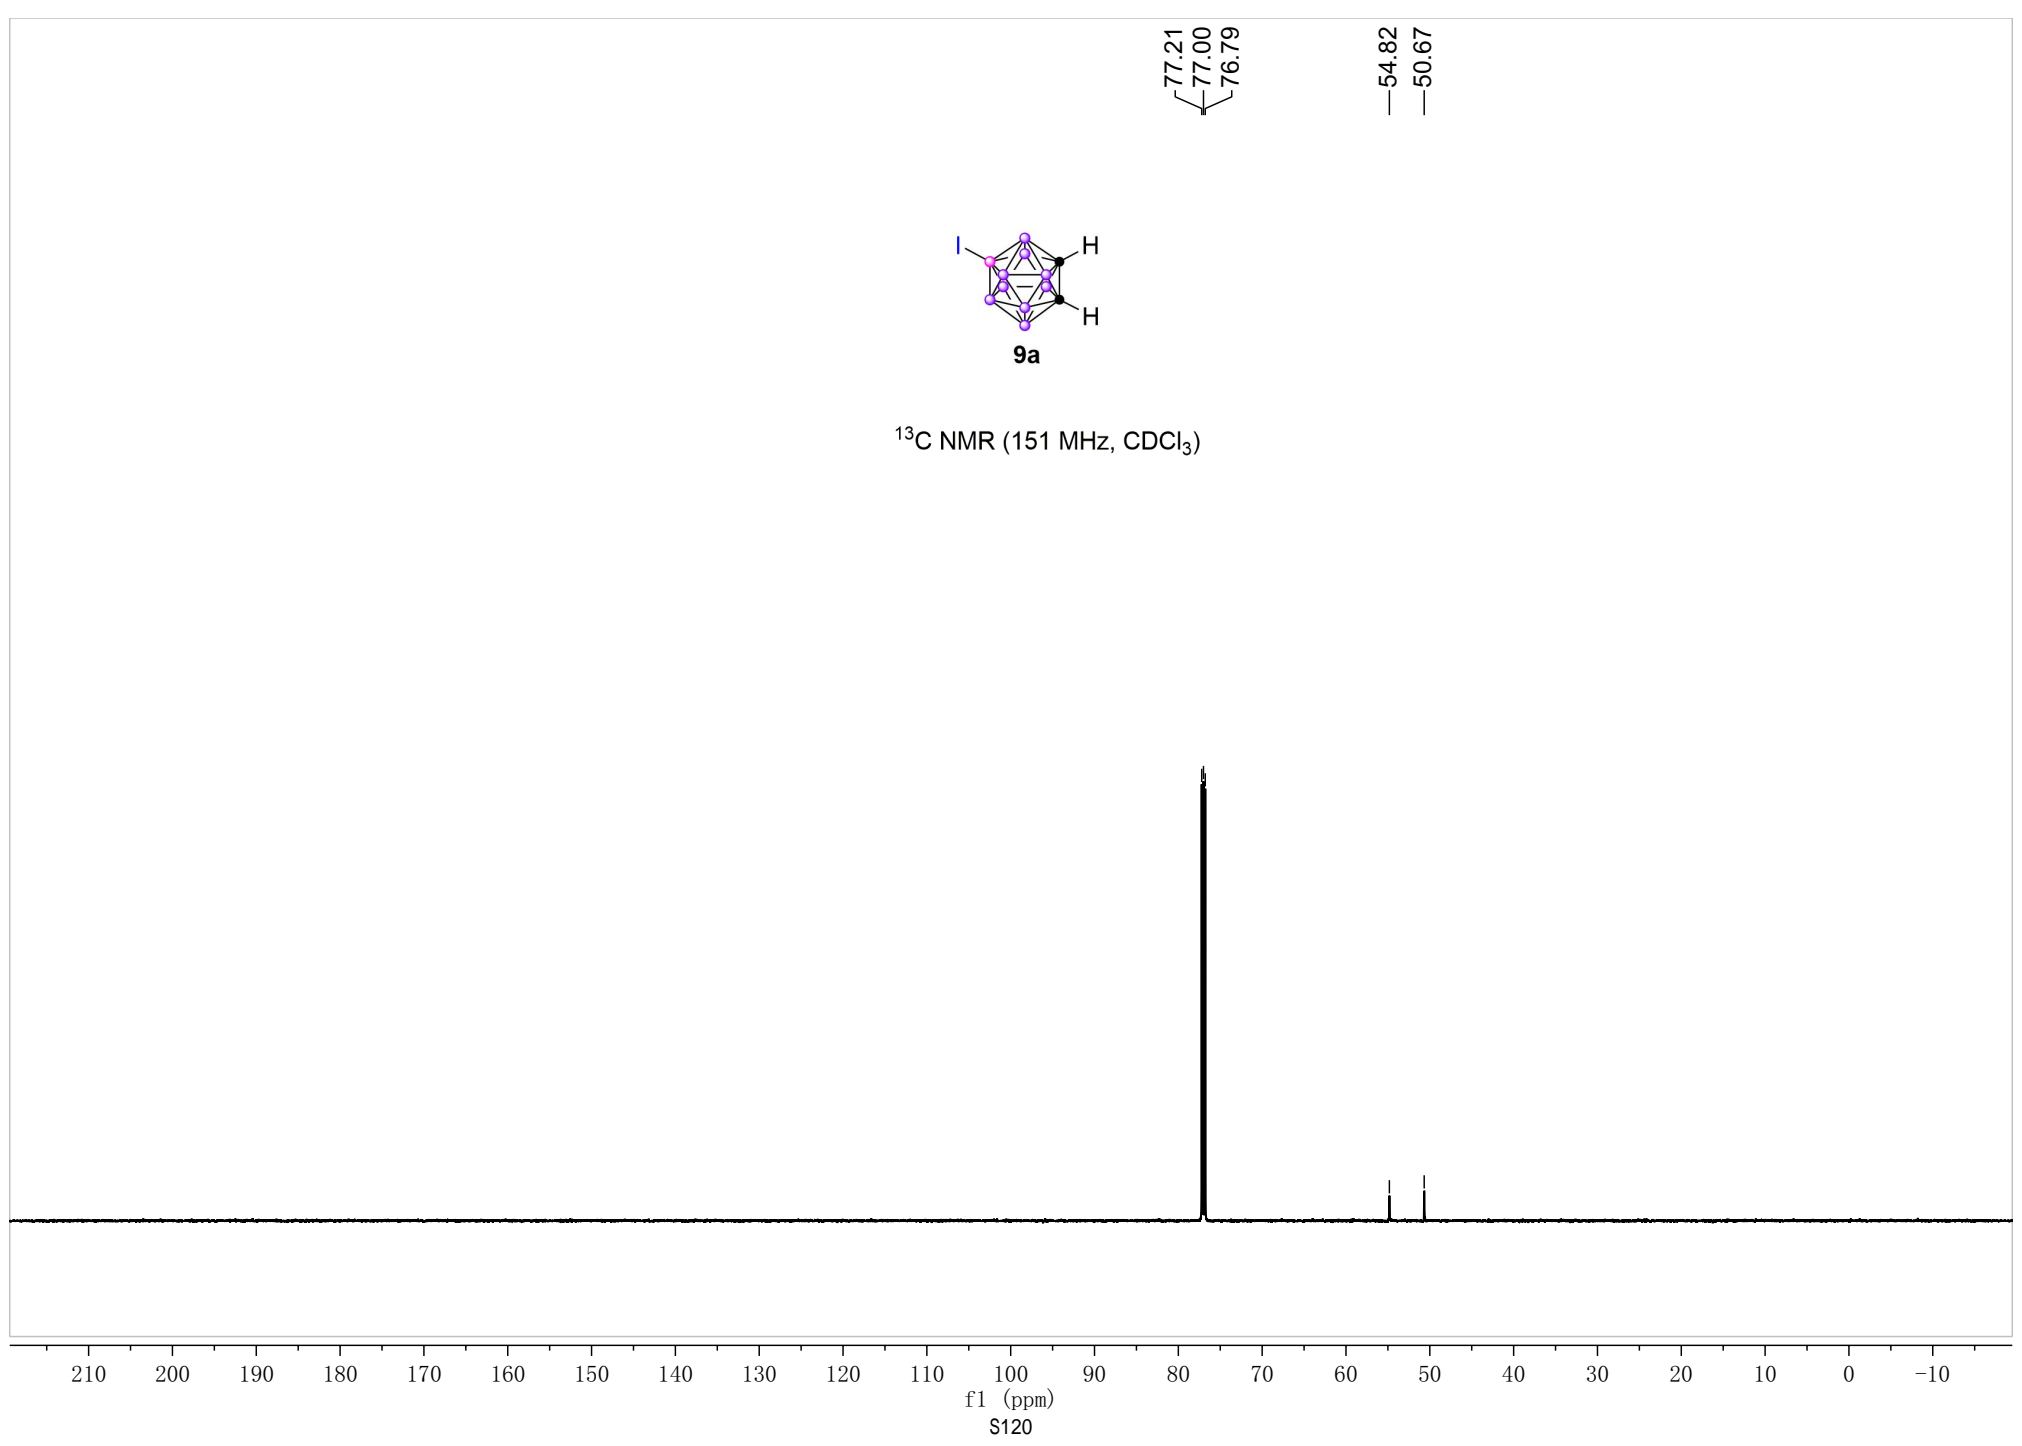

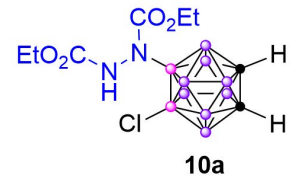

<sup>1</sup>H NMR (600 MHz, CDCl<sub>3</sub>)

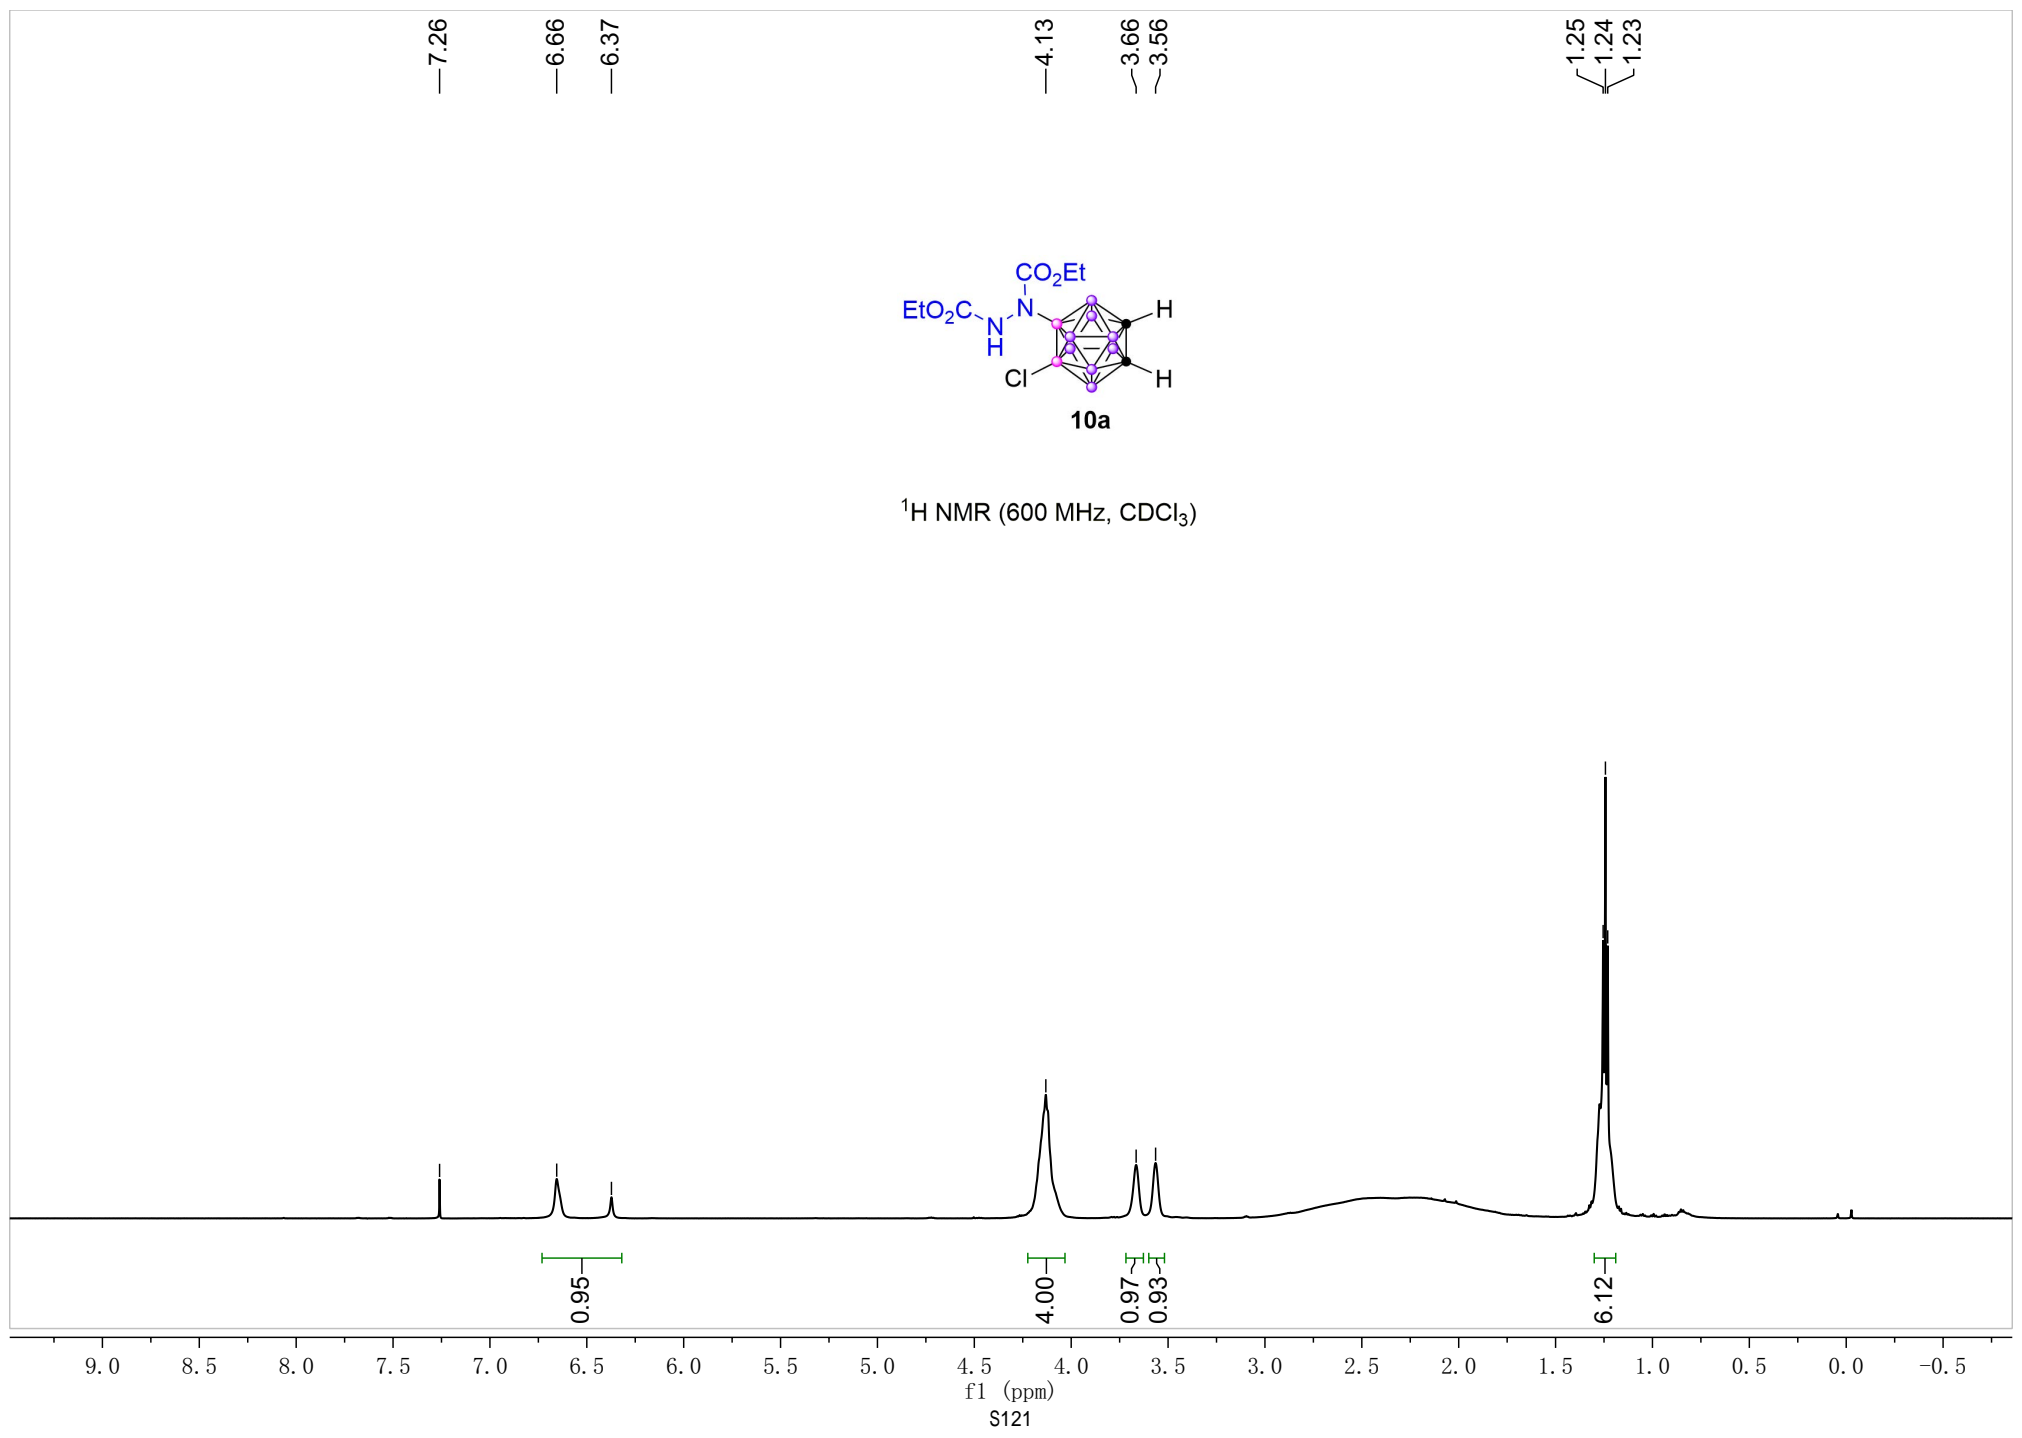



$^1\text{H}\{^{11}\text{B}\}$  NMR (600 MHz,  $\text{CDCl}_3$ )

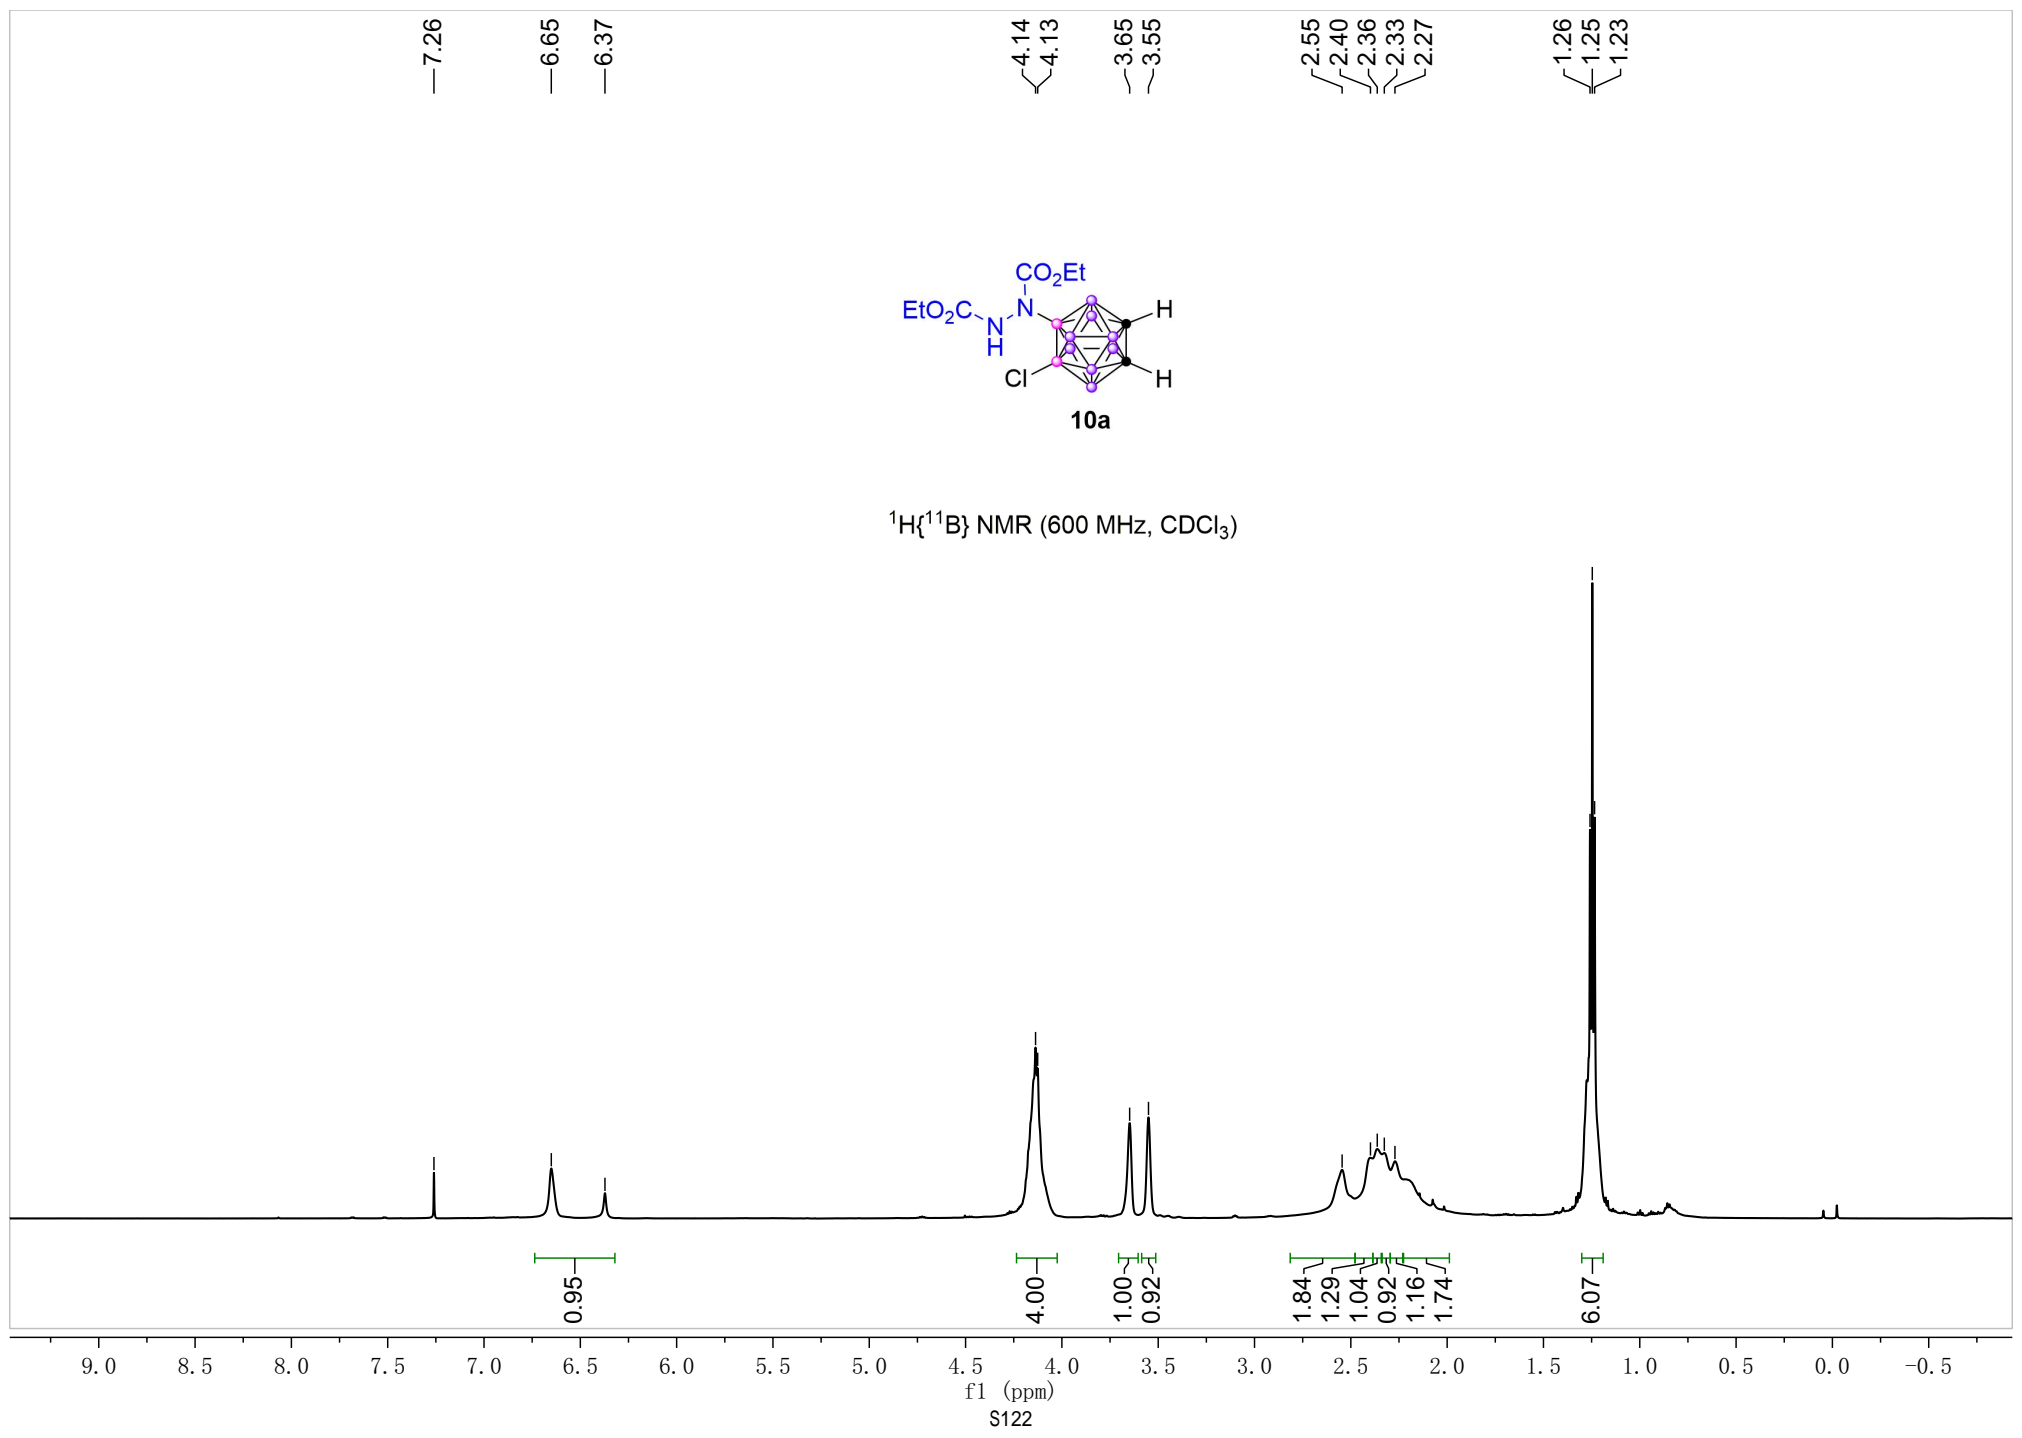

—7.26

—6.65

—6.37

4.14

4.13

3.65

3.55

2.55

2.40

2.36

2.33

2.27

1.26

1.25

1.23

0.95

4.00

1.00

0.92

1.84

1.29

1.04

0.92

1.16

1.74

6.07

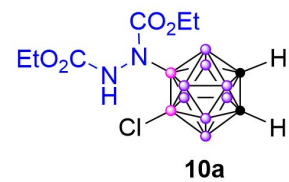

$^{11}\text{B}$  NMR (193 MHz,  $\text{CDCl}_3$ )

7.30  
6.37

9.27  
10.21  
11.16

15.78  
18.43

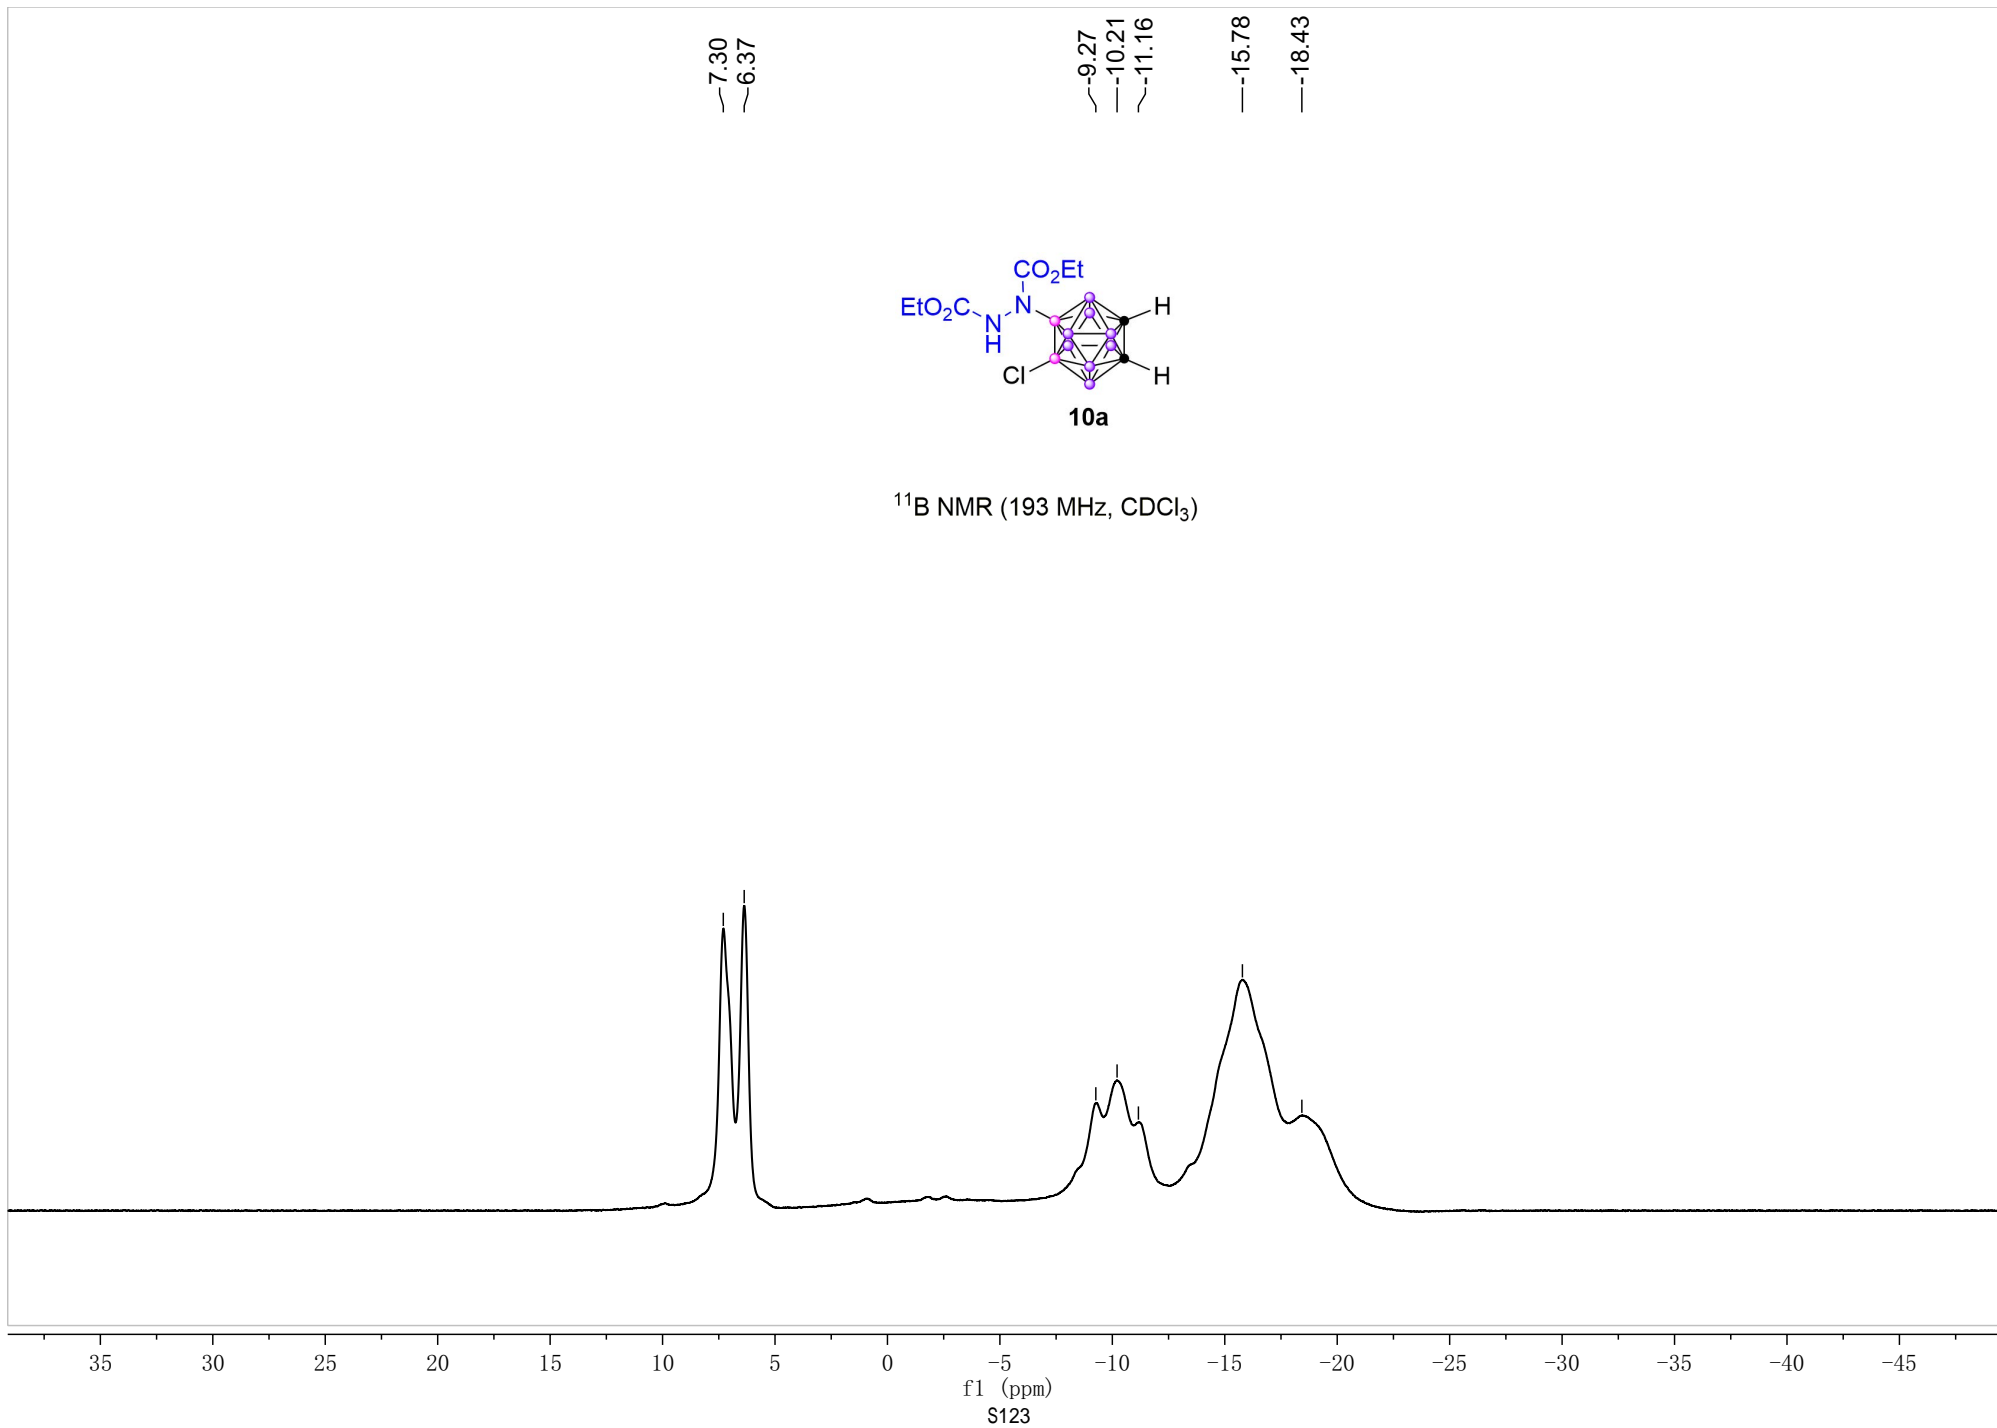



$^{11}\text{B}\{^1\text{H}\}$  NMR (193 MHz,  $\text{CDCl}_3$ )

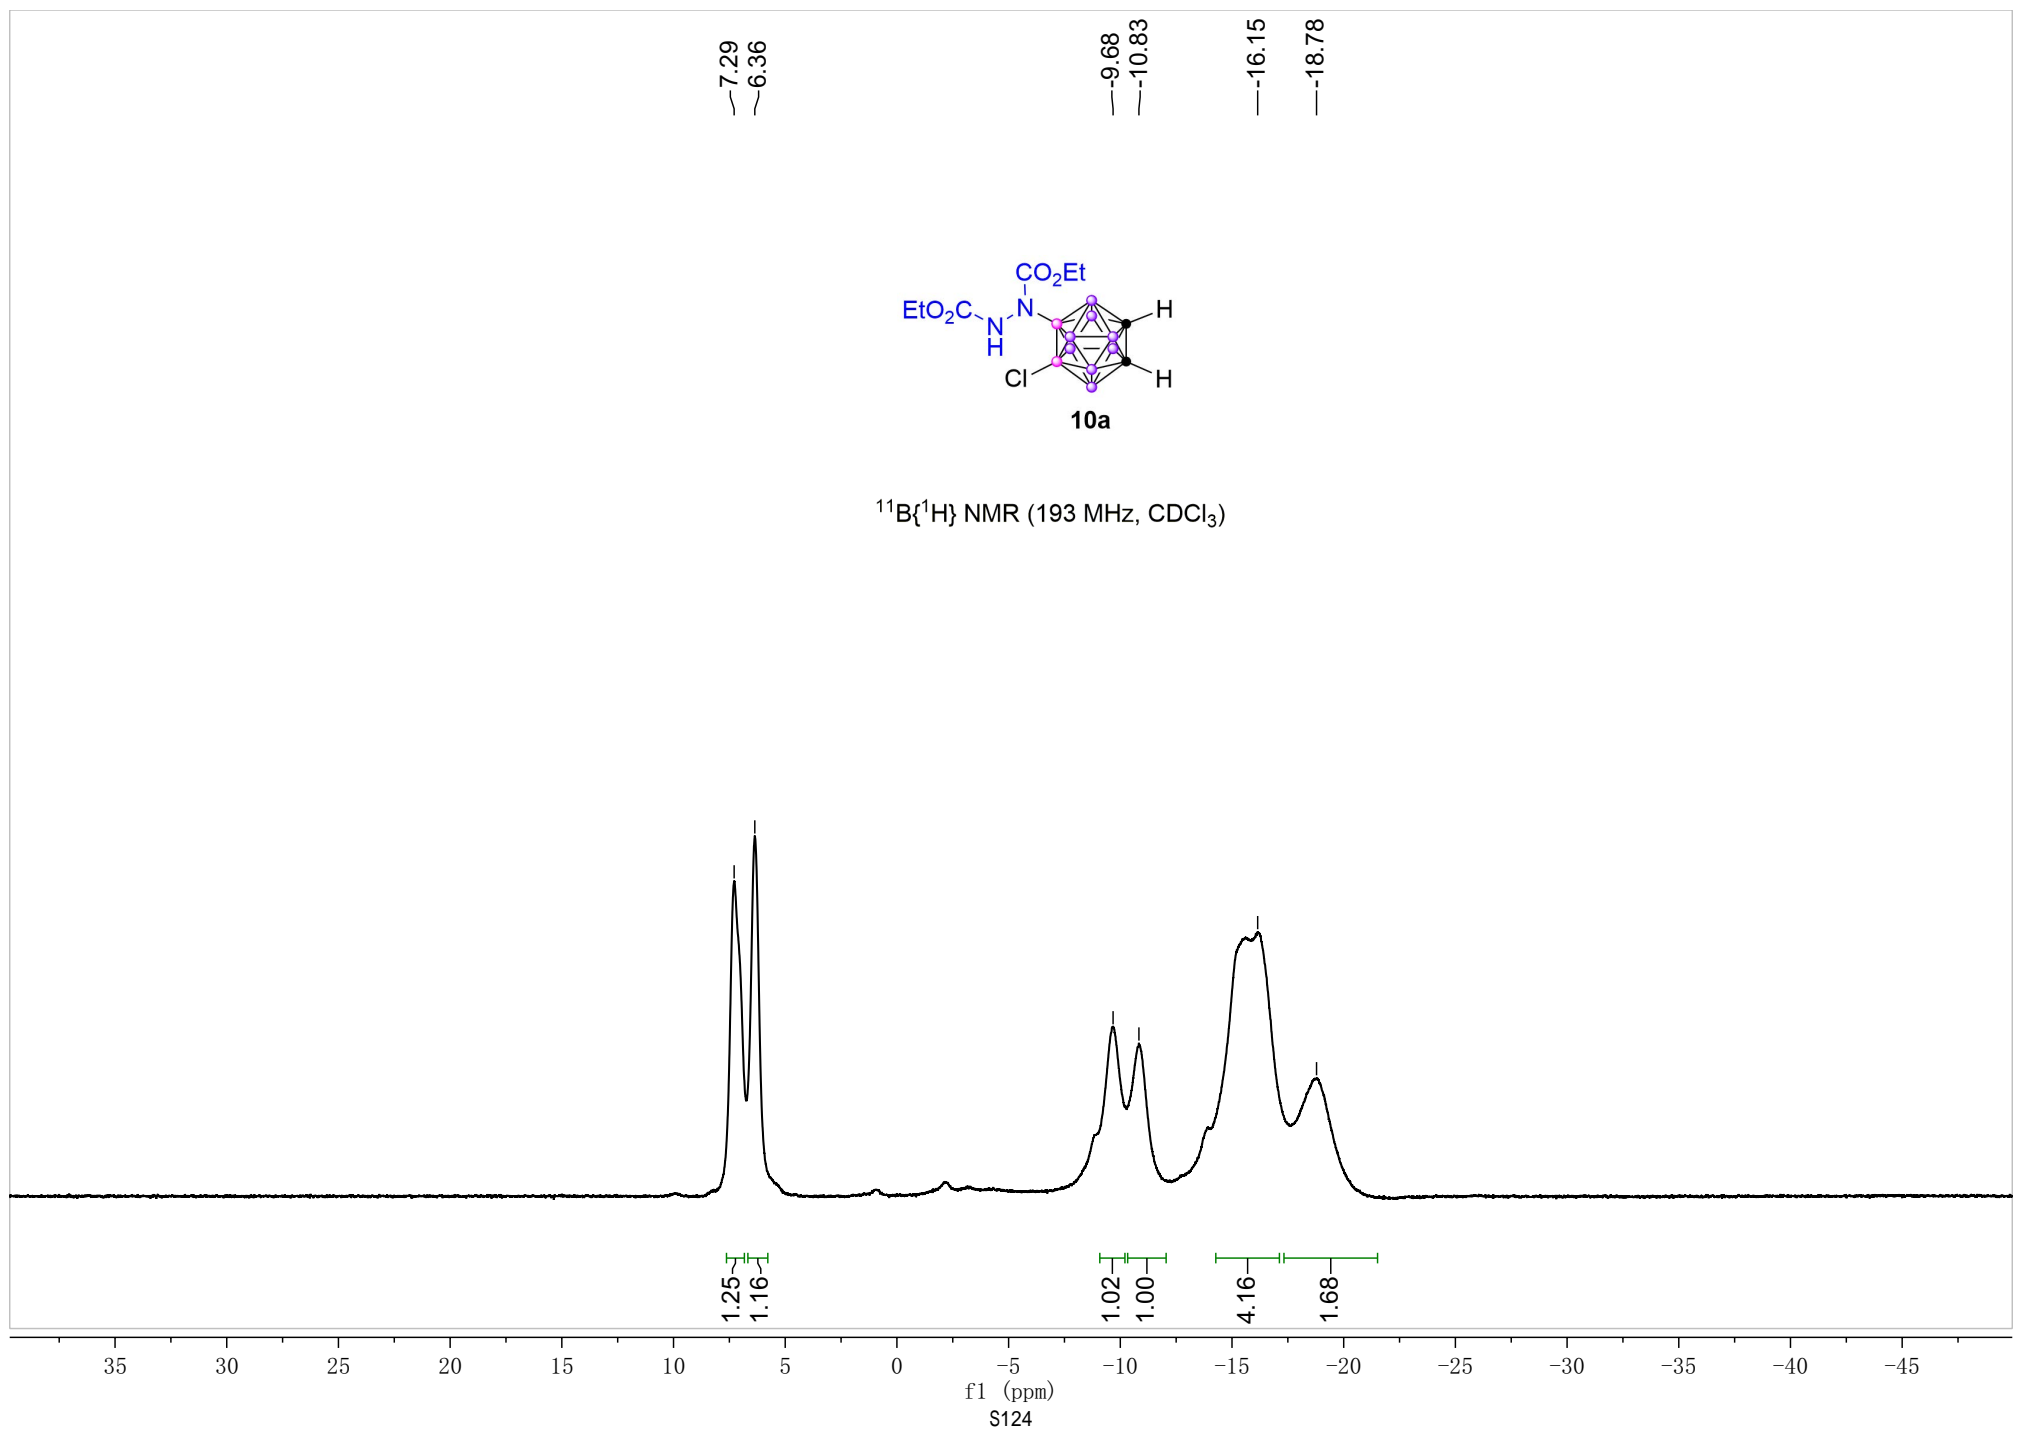

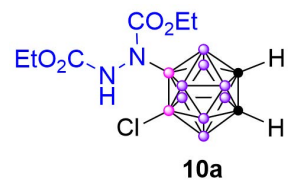

<sup>13</sup>C NMR (151 MHz, CDCl<sub>3</sub>)

157.66  
156.27

77.21  
77.00  
76.79

62.50  
61.60

44.35  
43.06

14.42  
14.18

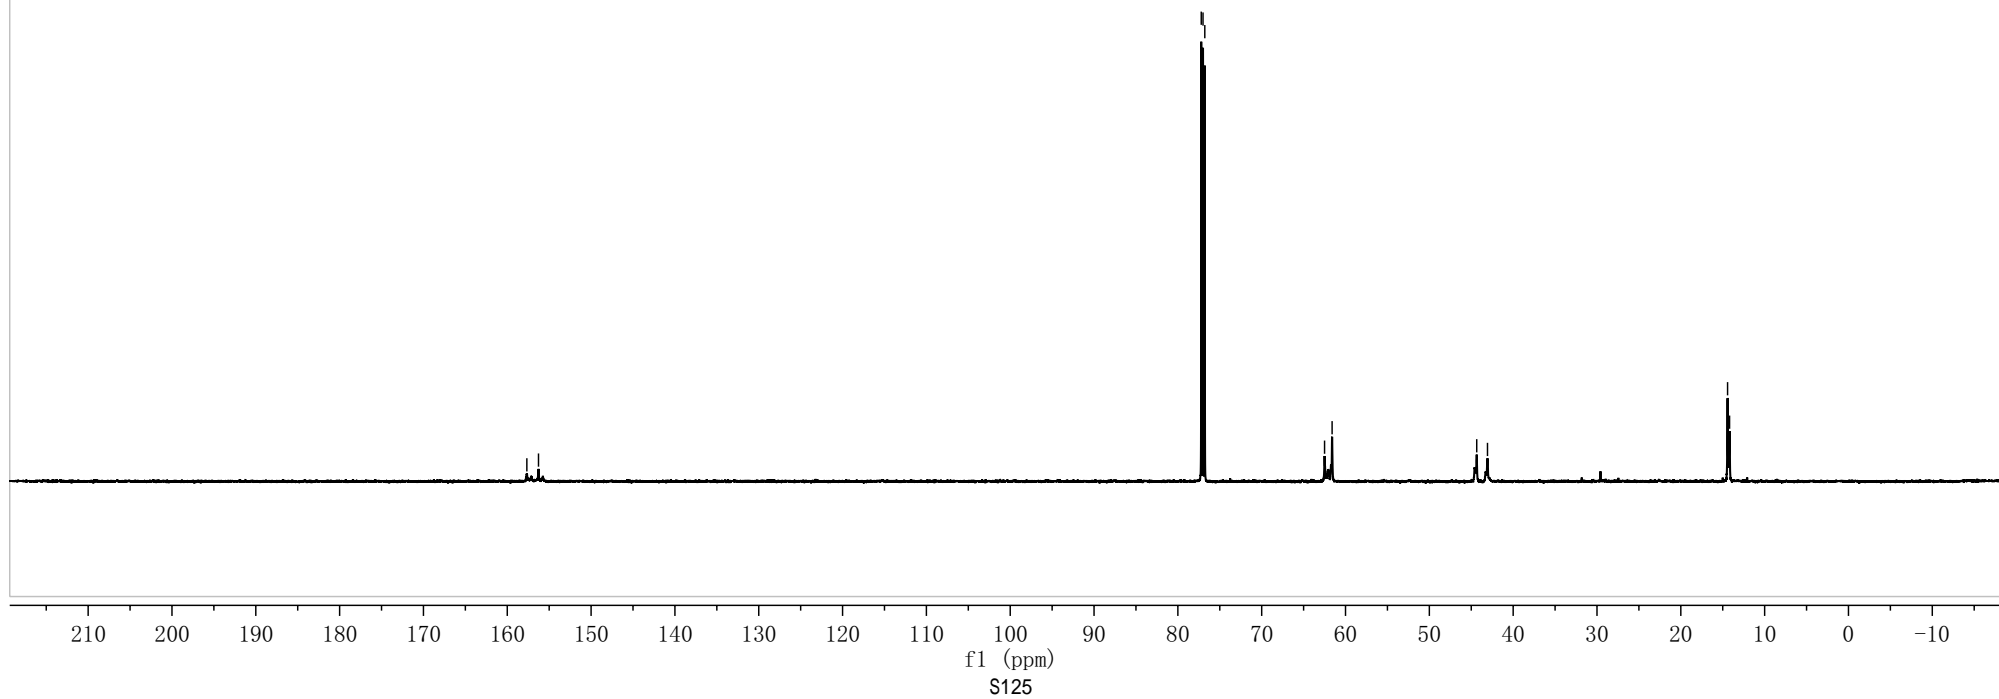

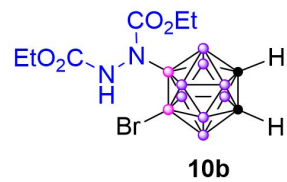

<sup>1</sup>H NMR (600 MHz, CDCl<sub>3</sub>)

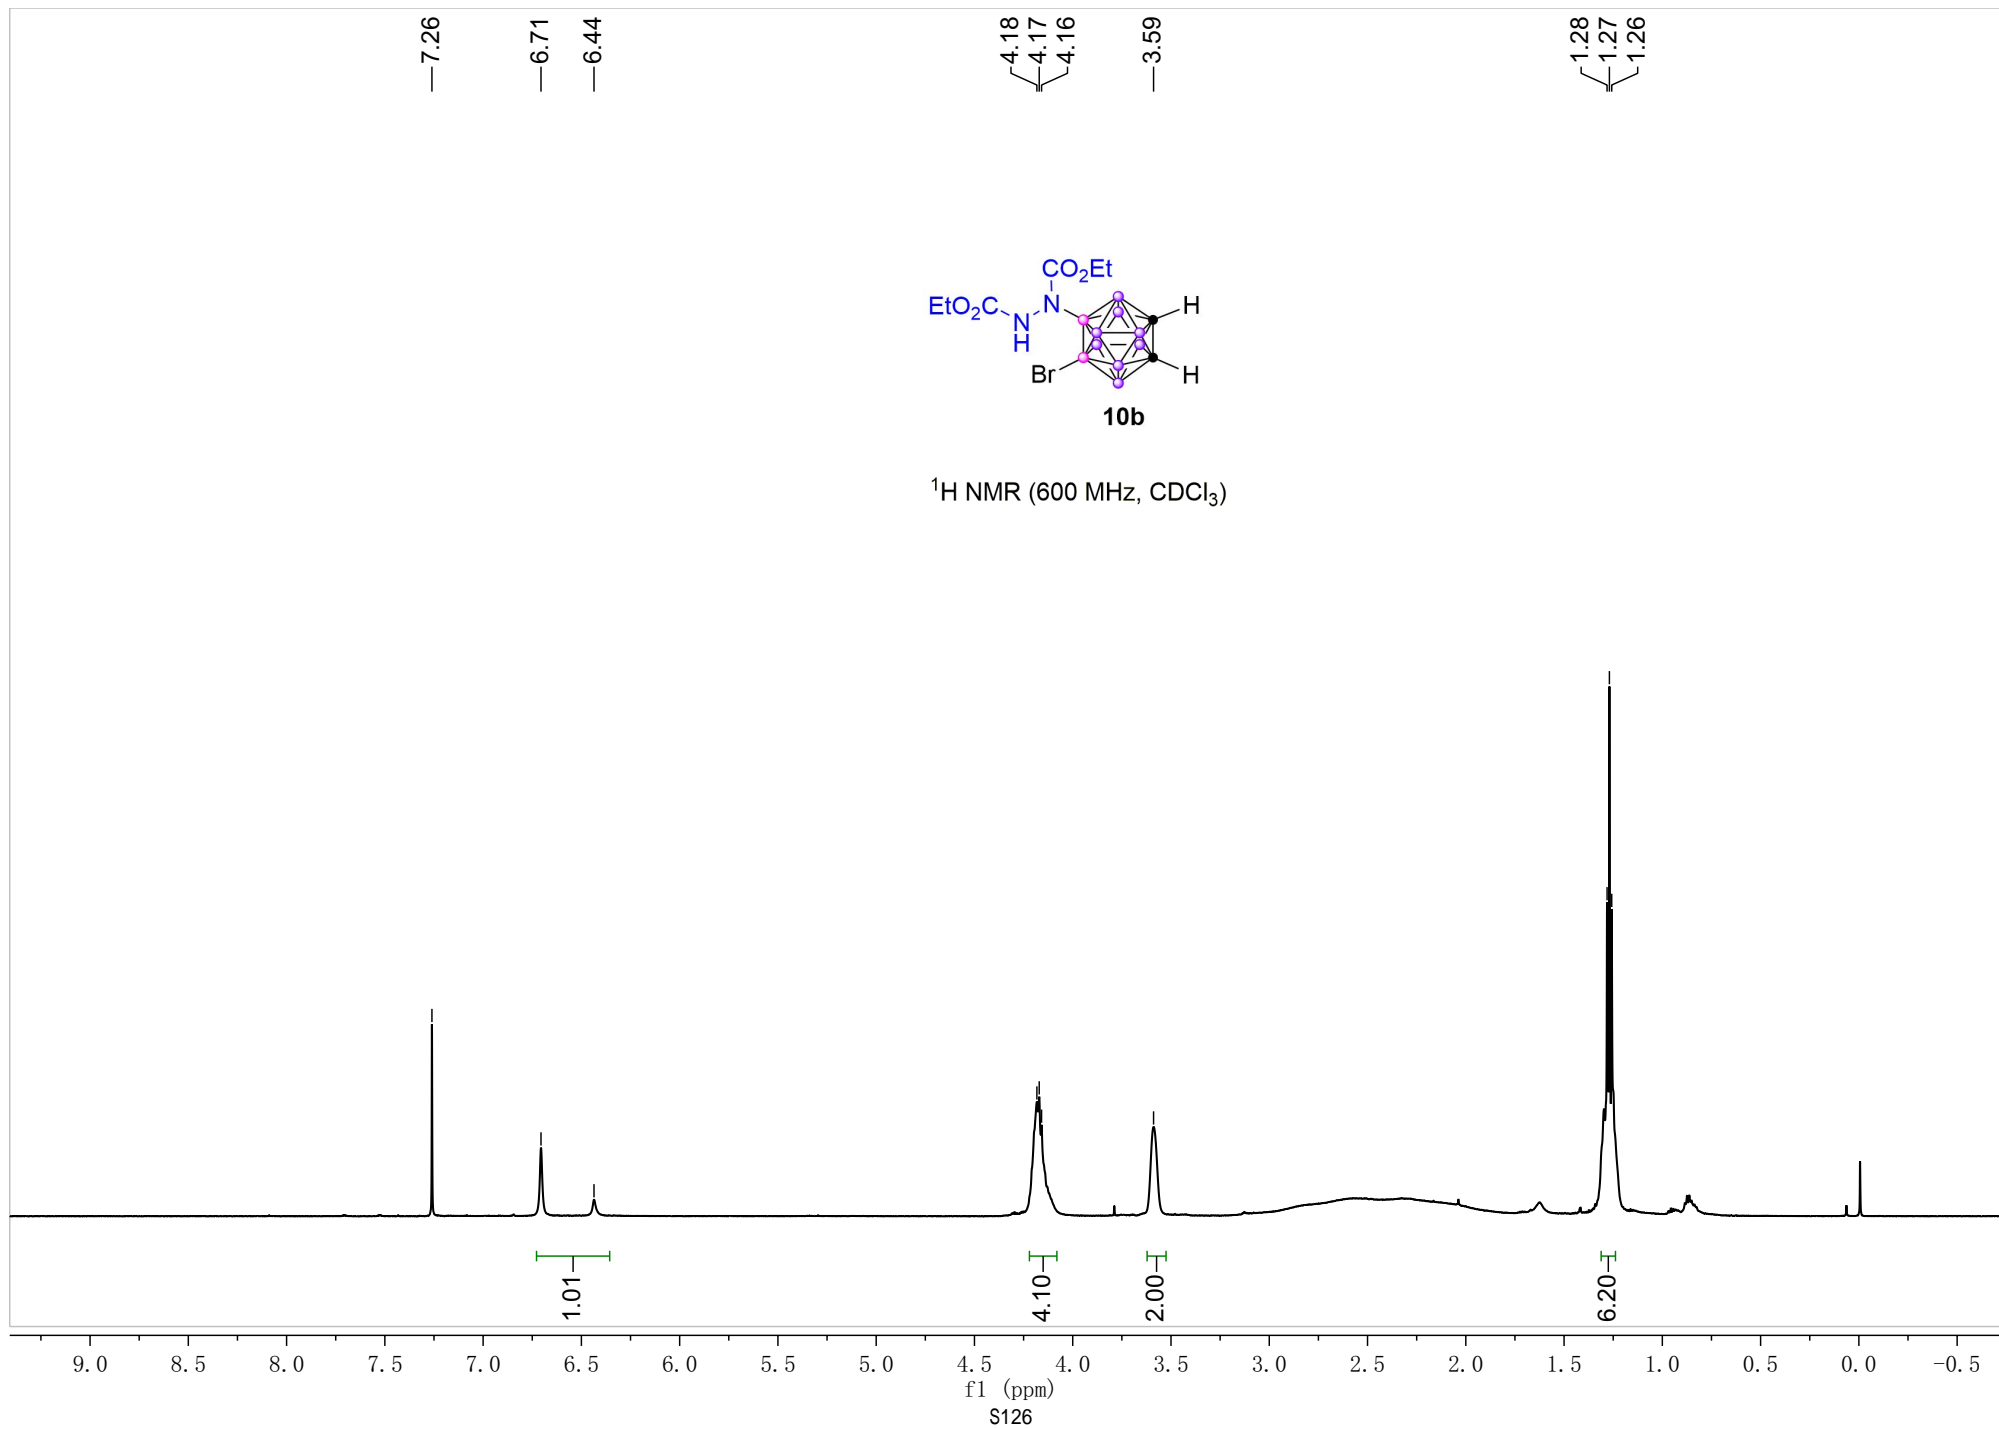





<sup>1</sup>H{<sup>11</sup>B} NMR (600 MHz, CDCl<sub>3</sub>)

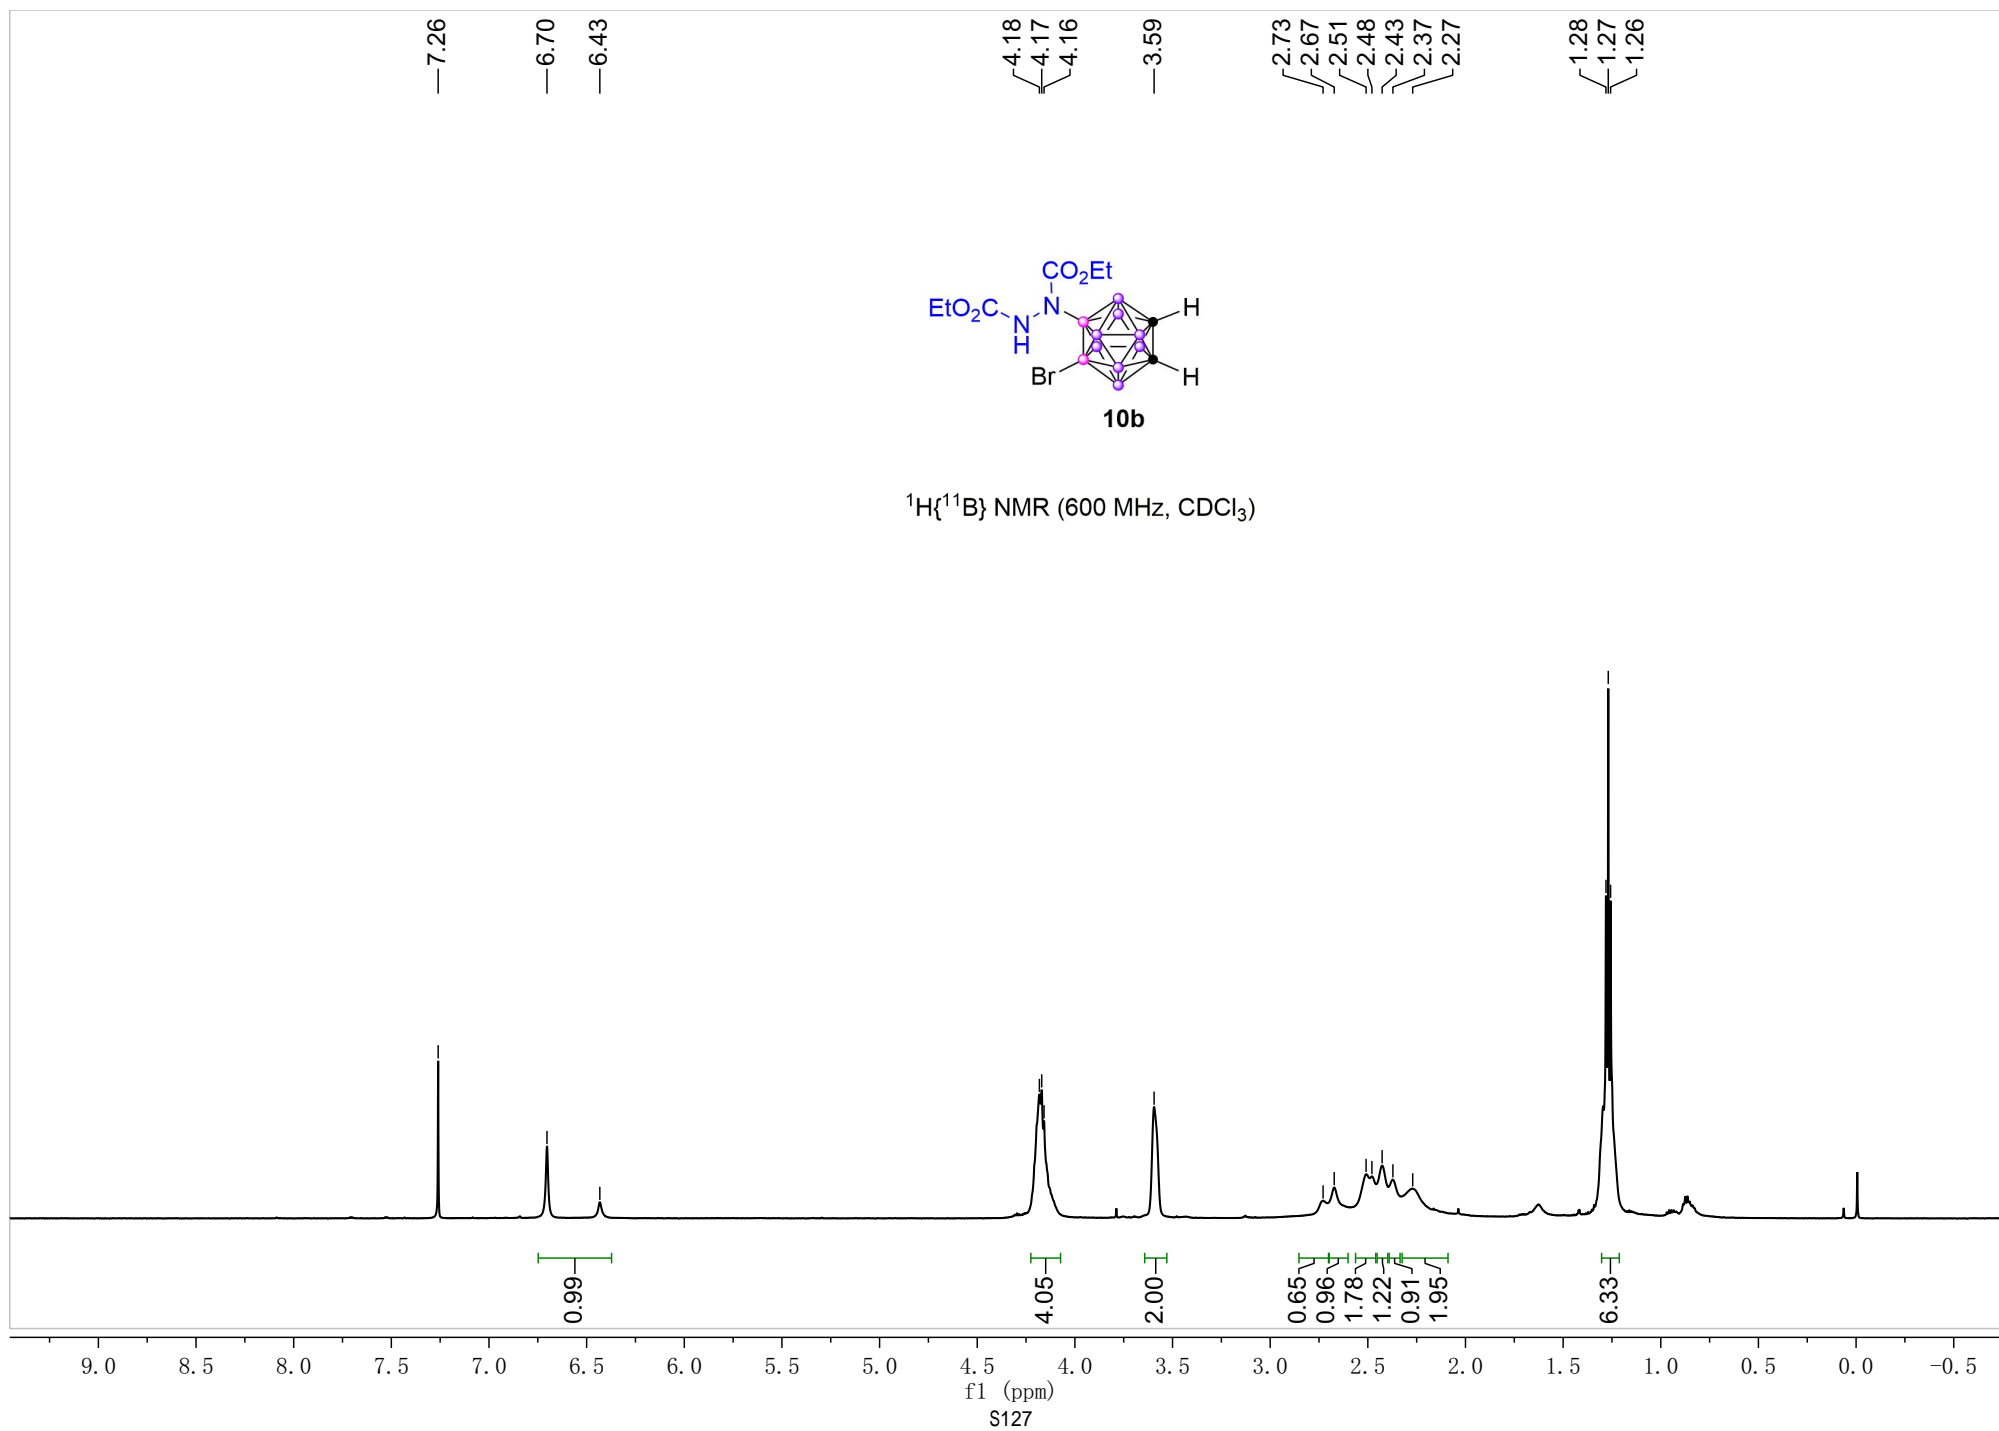



$^{11}\text{B}$  NMR (193 MHz,  $\text{CDCl}_3$ )

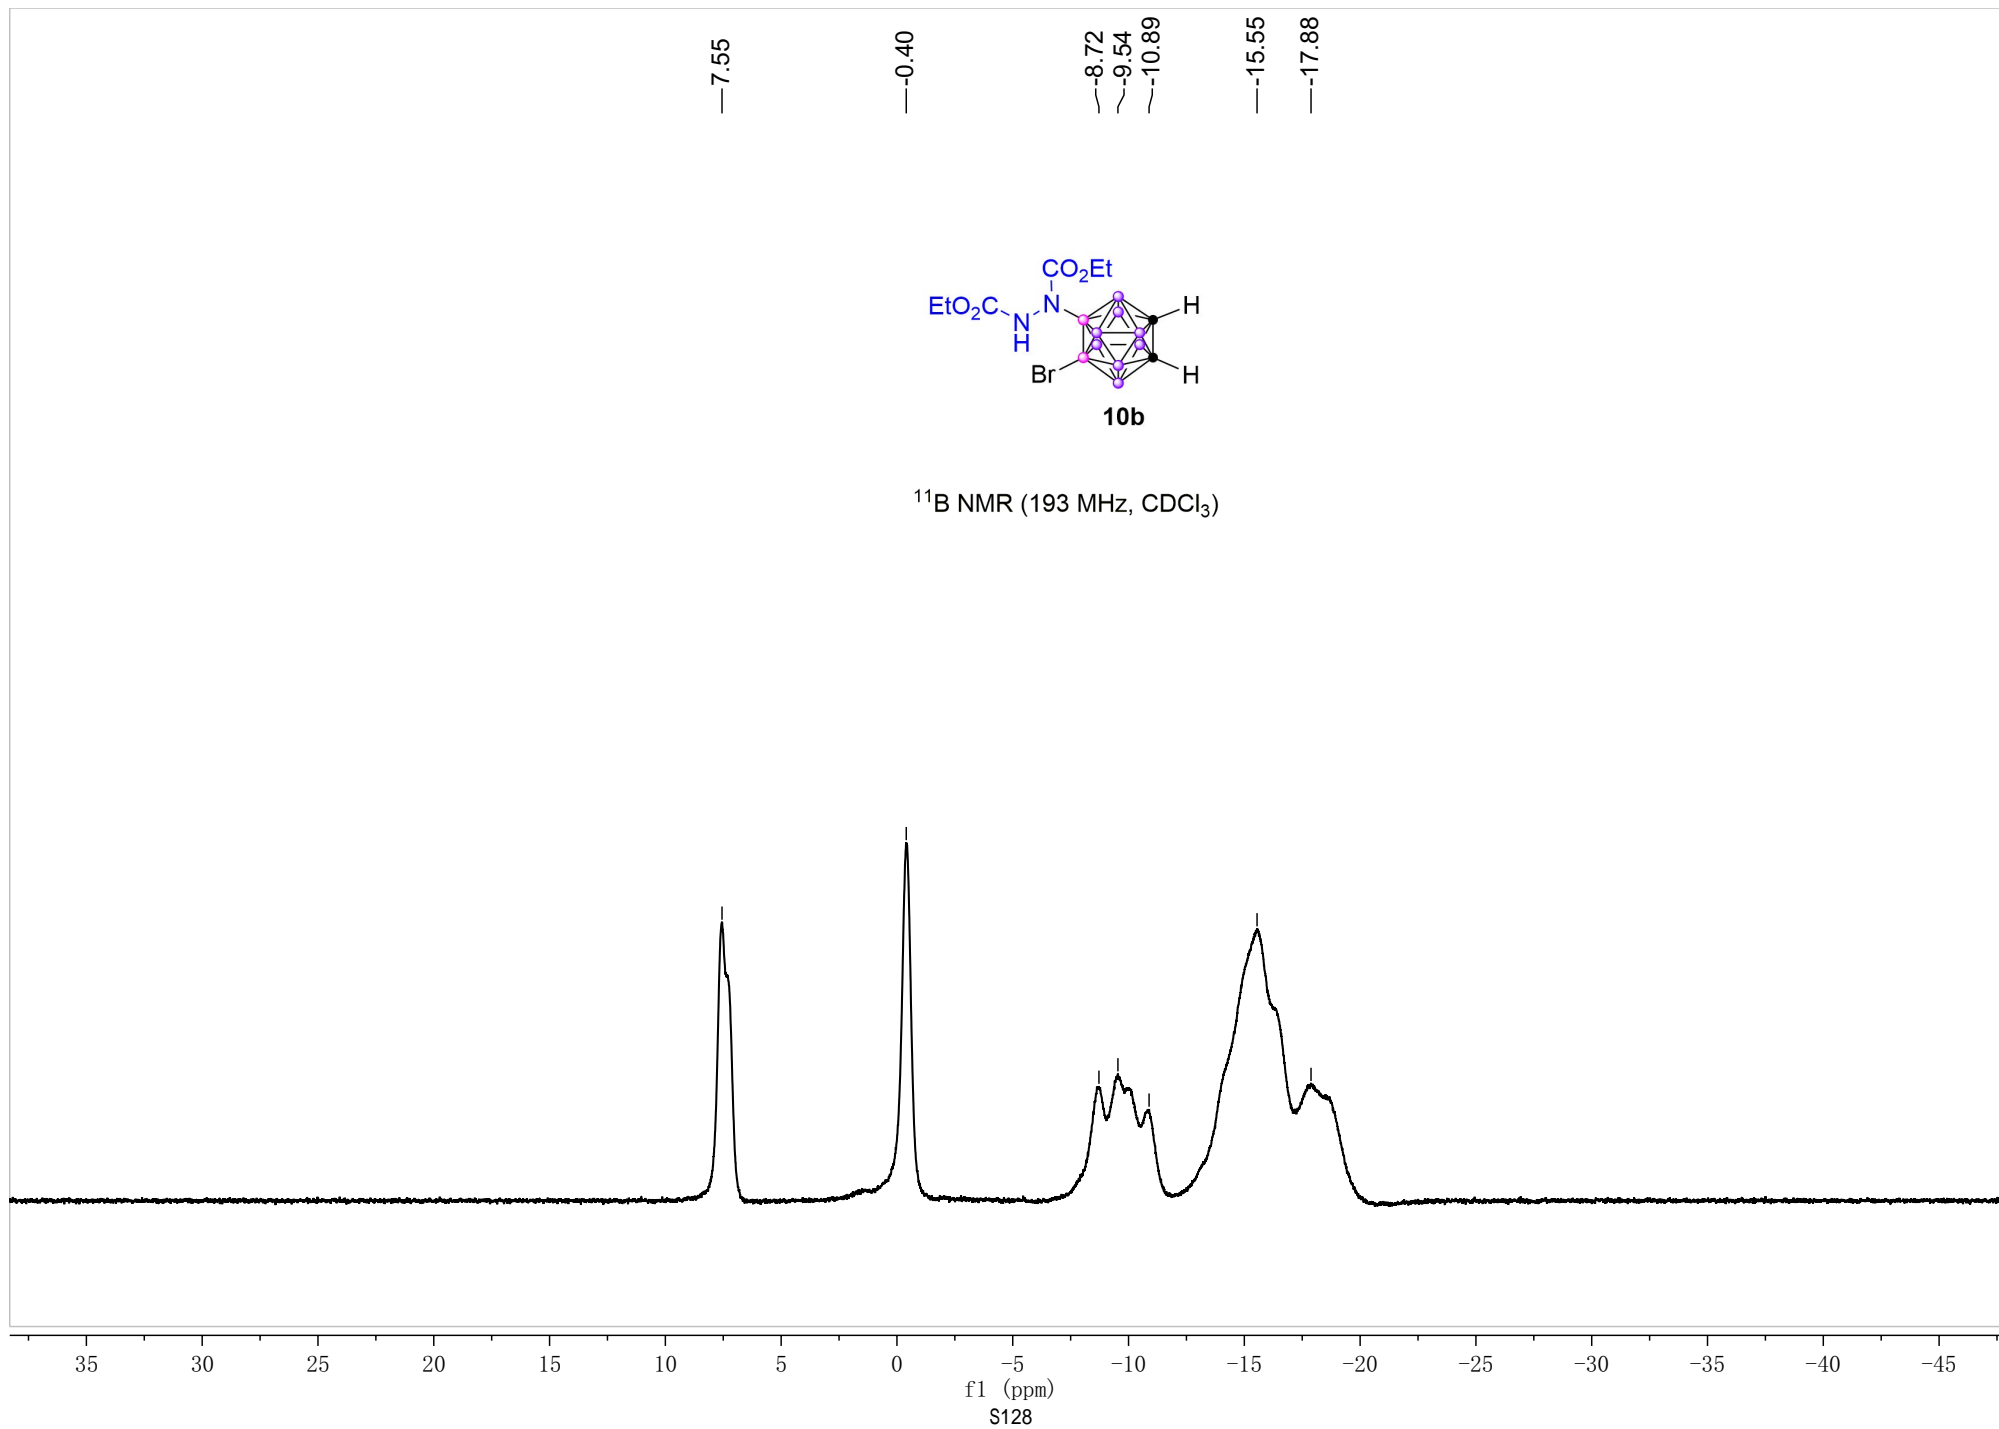

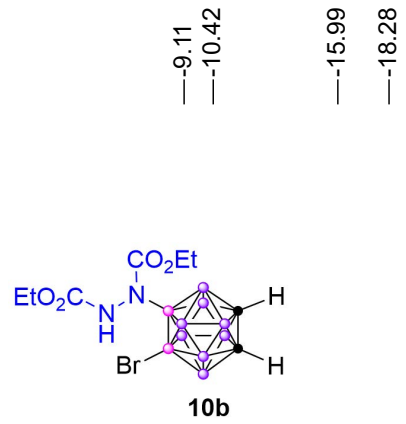

<sup>11</sup>B{<sup>1</sup>H} NMR (193 MHz, CDCl<sub>3</sub>)

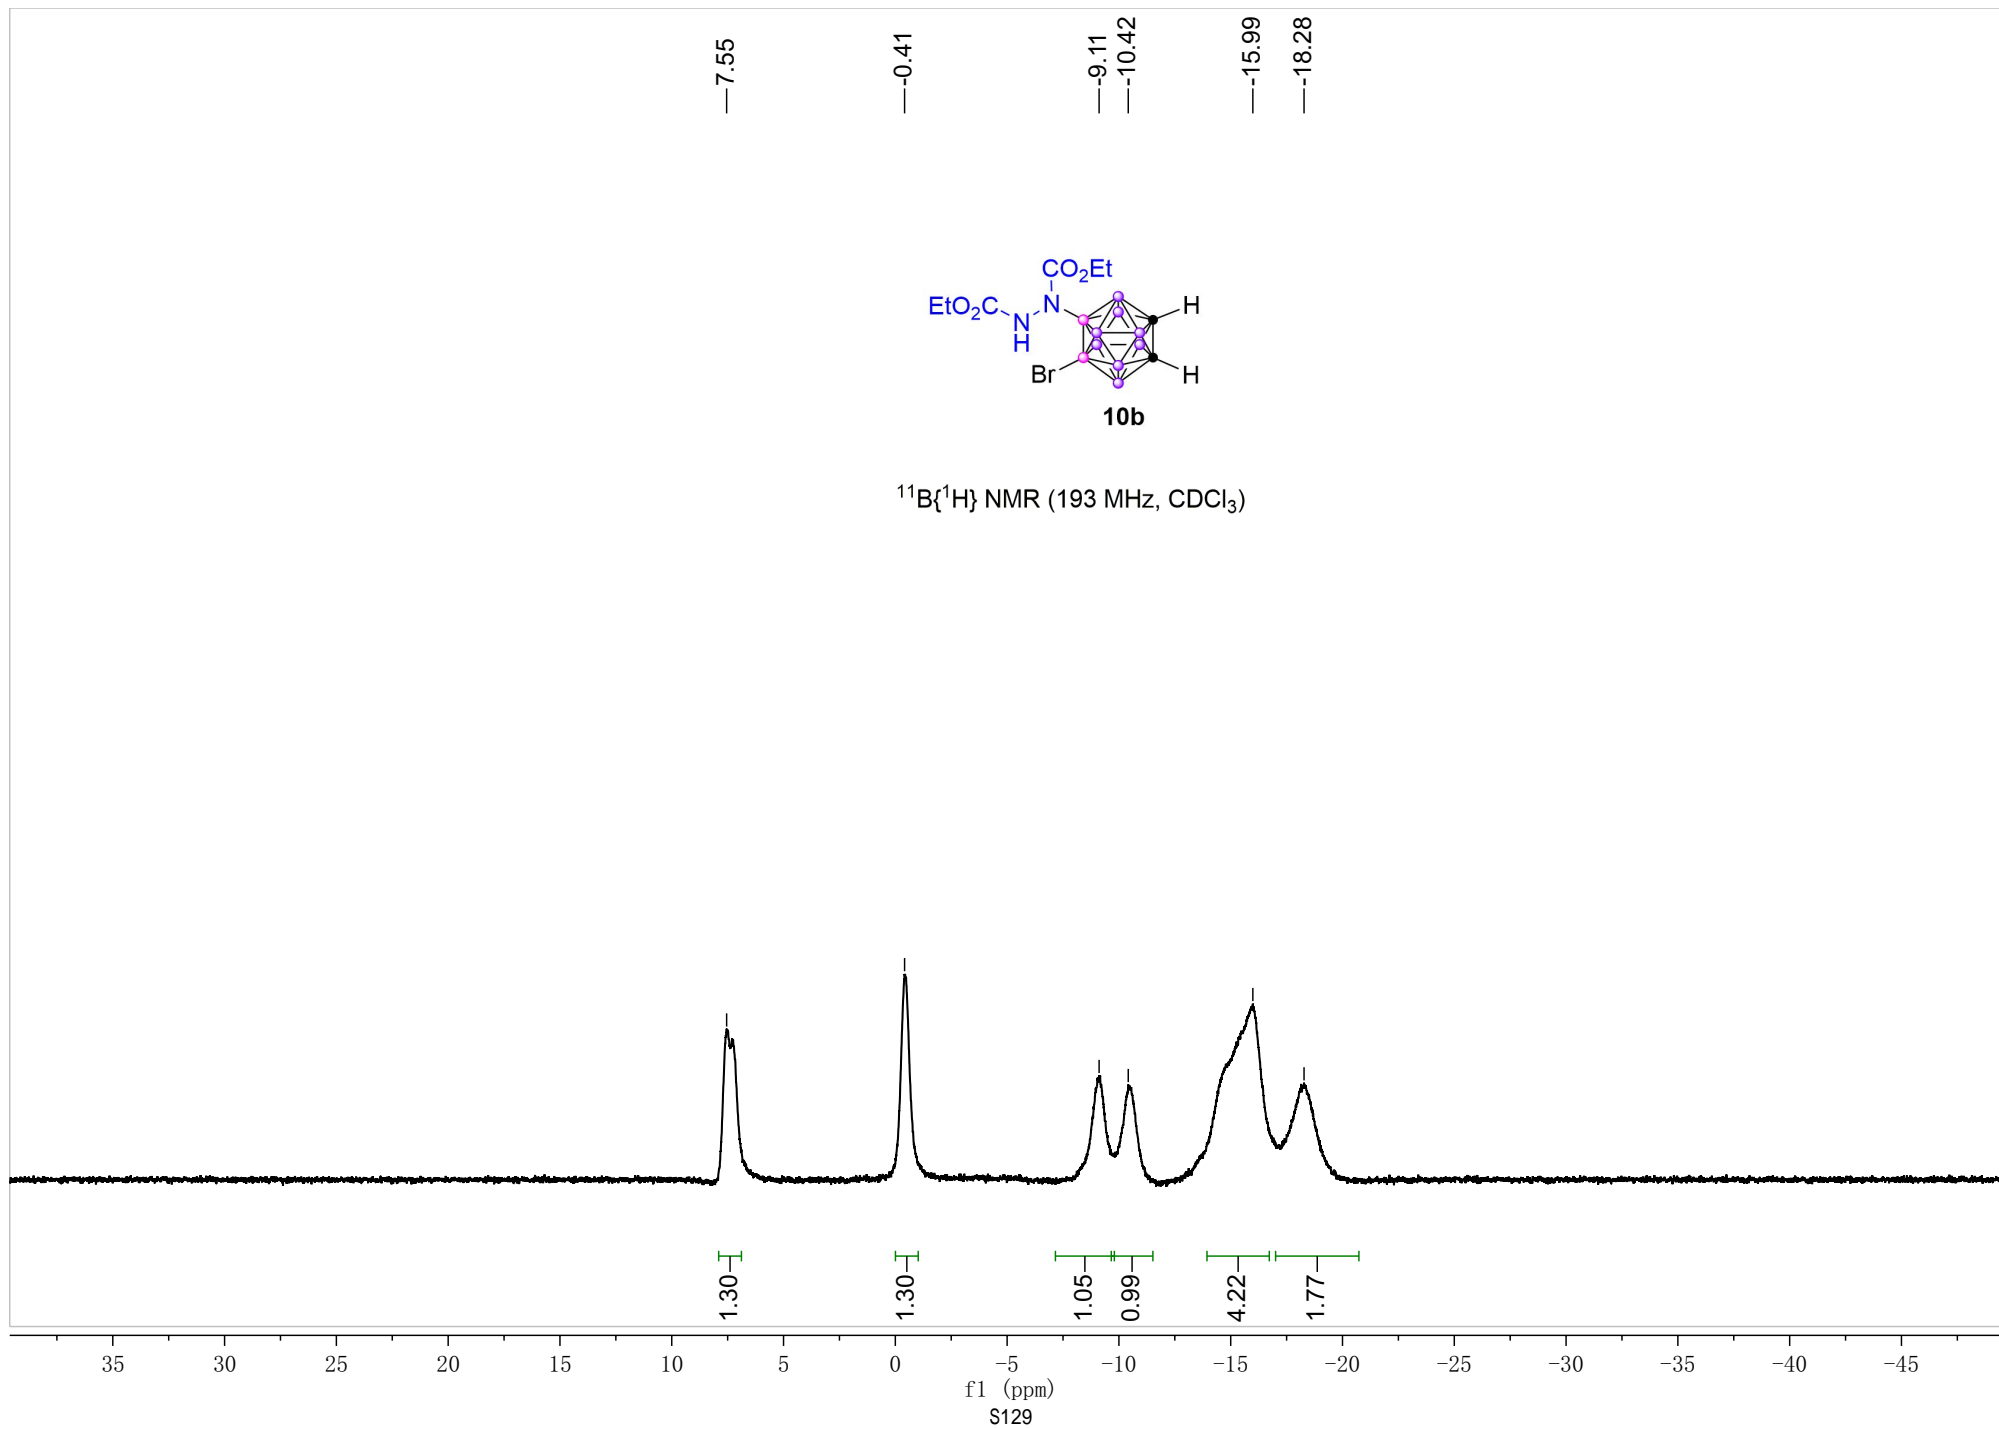



$^{13}\text{C}$  NMR (151 MHz,  $\text{CDCl}_3$ )

157.61  
156.28

77.21  
77.00  
76.79

62.56  
61.64

45.32  
45.17

14.45  
14.20

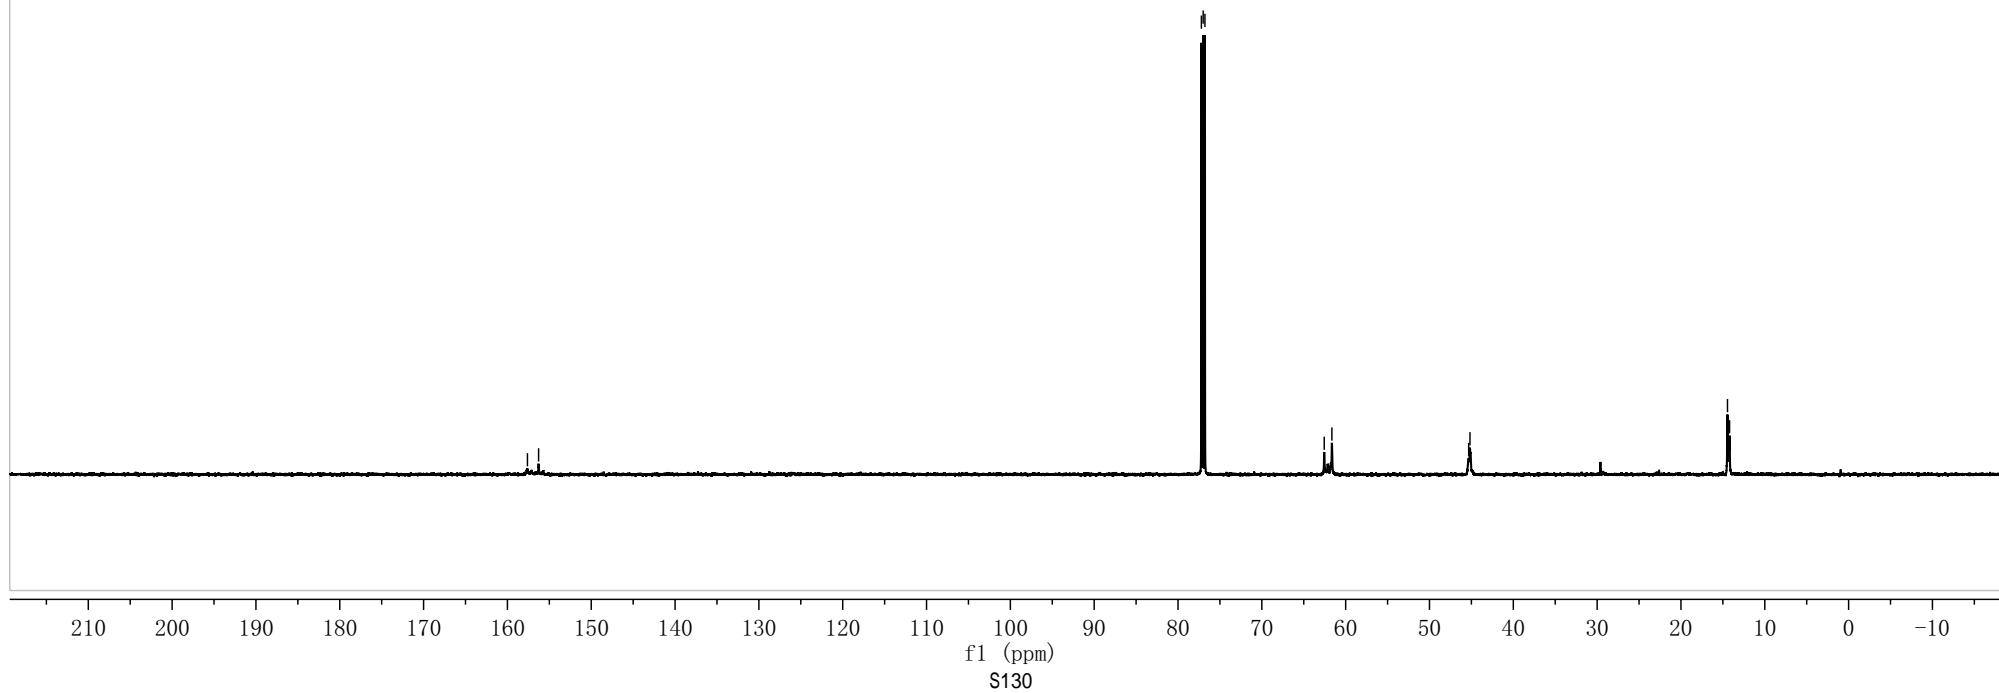

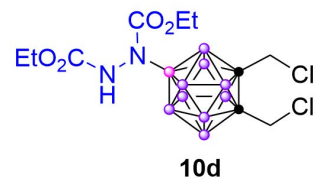

<sup>1</sup>H NMR (400 MHz, CDCl<sub>3</sub>)

7.26

6.41  
6.35  
6.15

4.20  
4.15

1.27  
1.25  
1.23

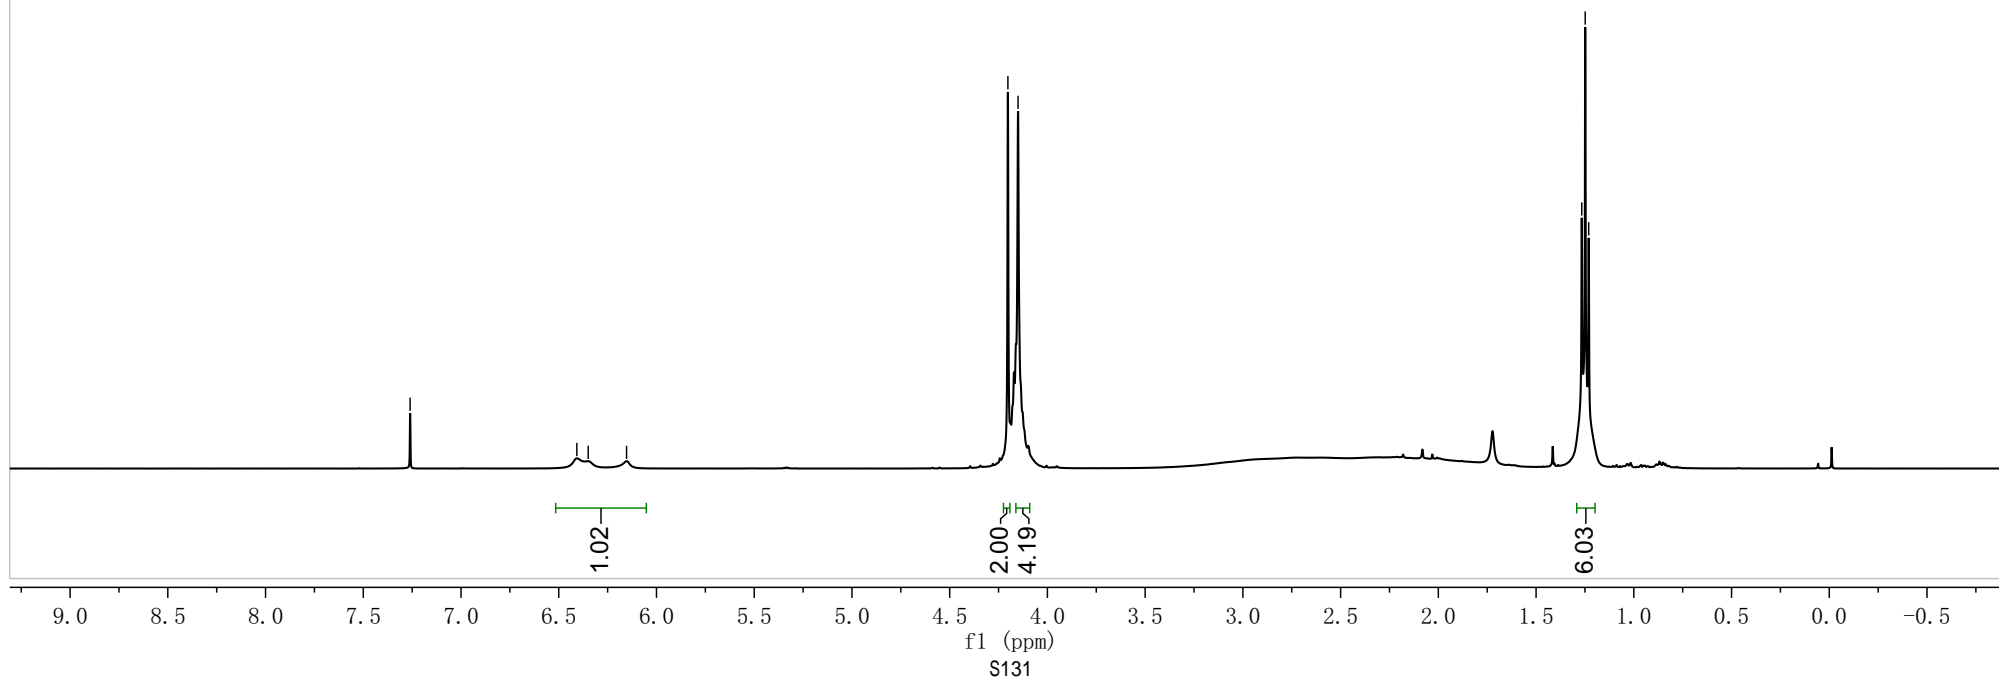

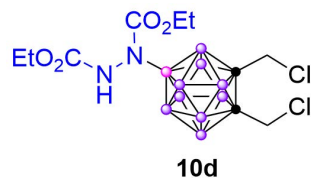

$^1\text{H}\{^{11}\text{B}\}$  NMR (400 MHz,  $\text{CDCl}_3$ )

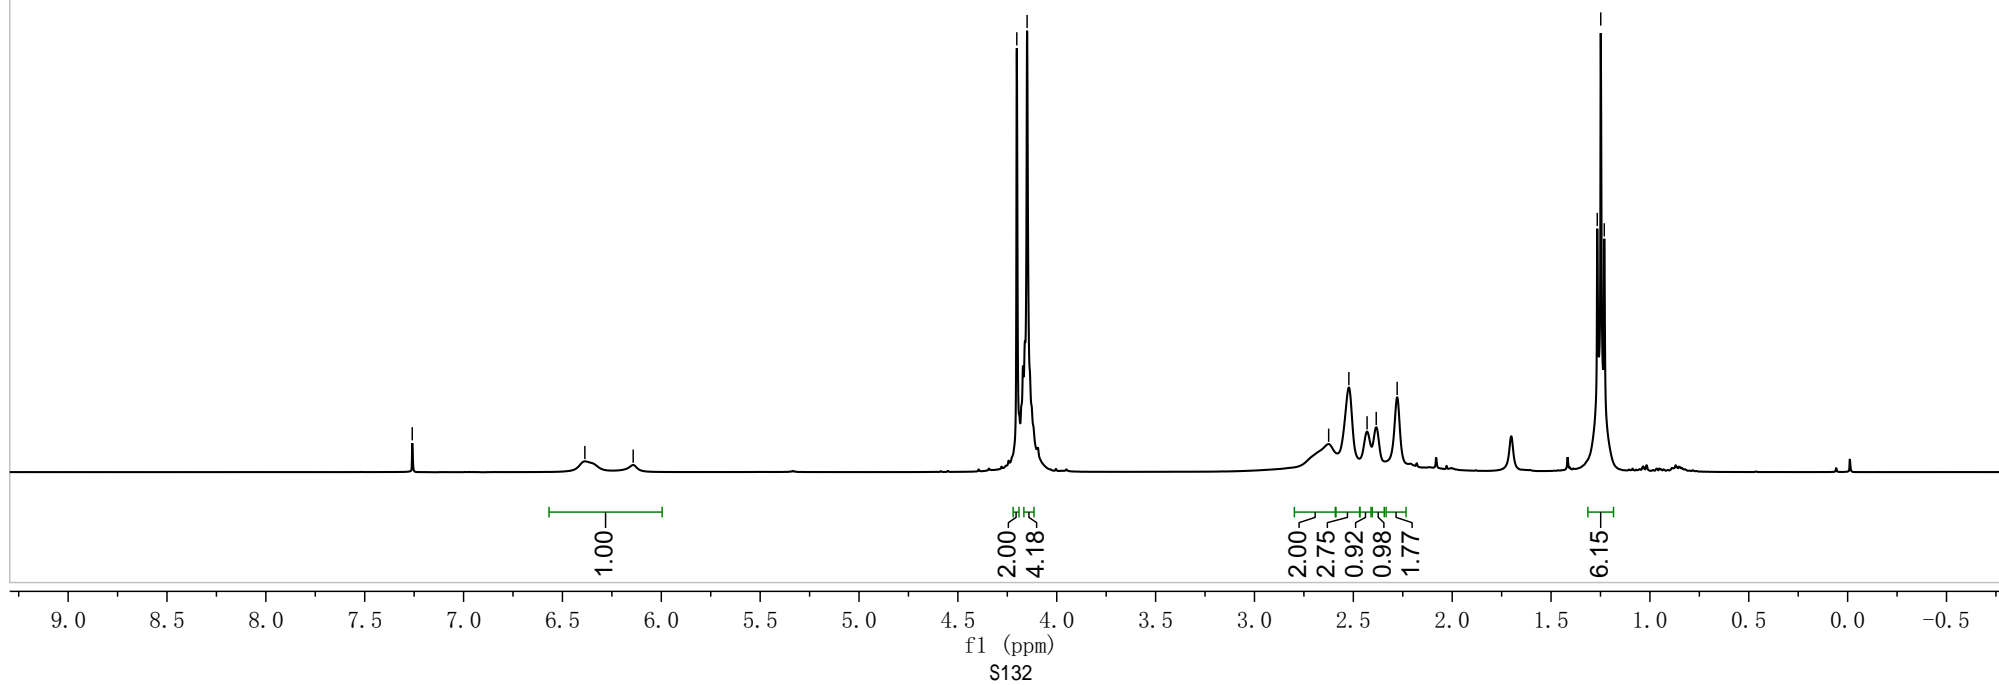

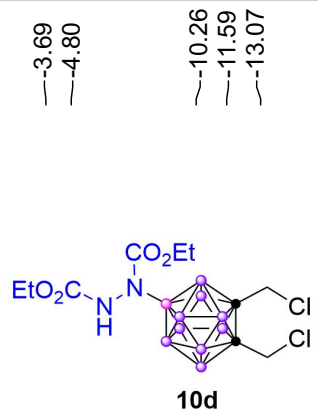

<sup>11</sup>B NMR (128 MHz, CDCl<sub>3</sub>)

—8.50

—3.69  
—4.80

—10.26  
—11.59  
—13.07

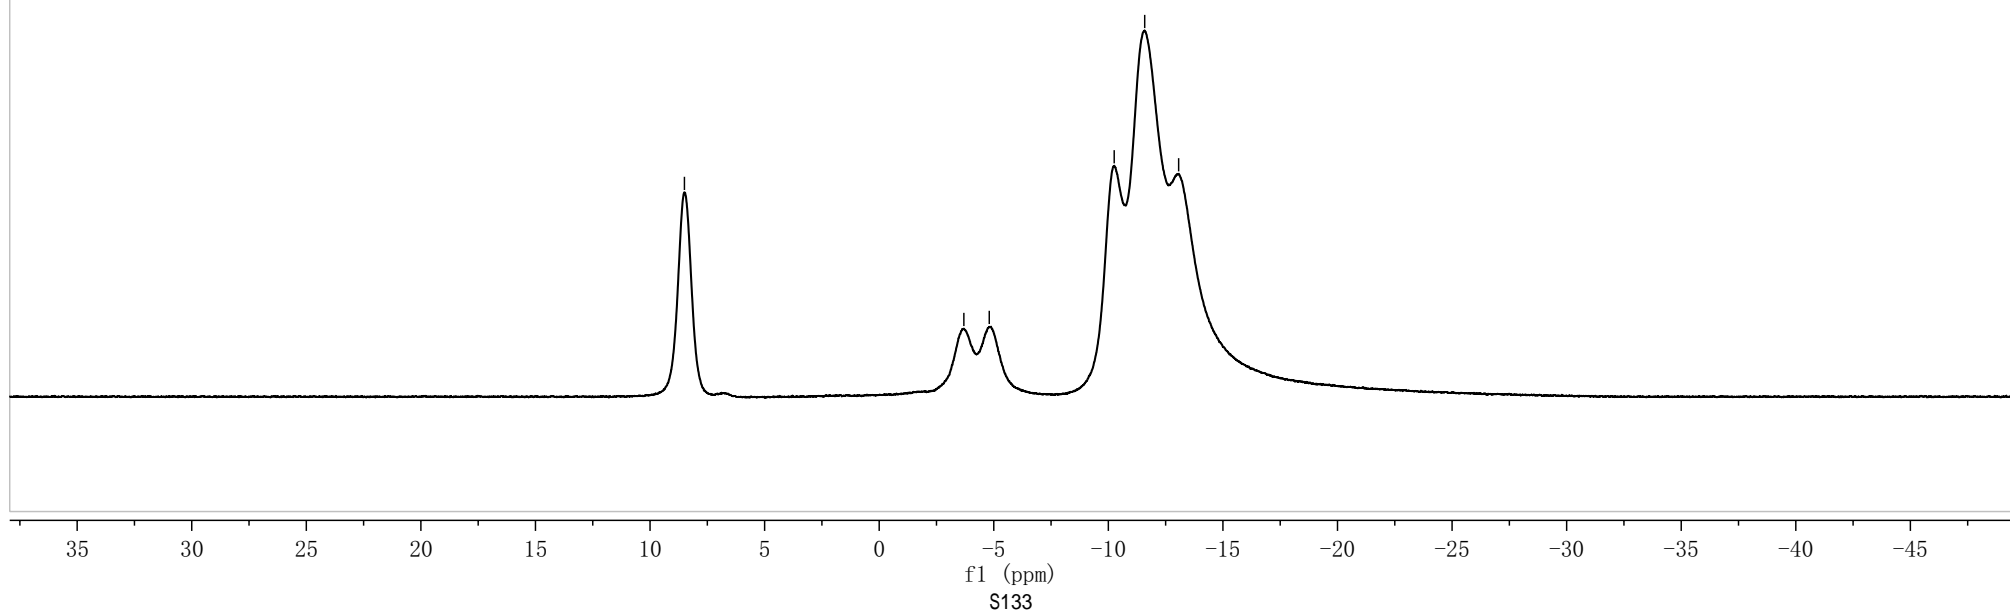

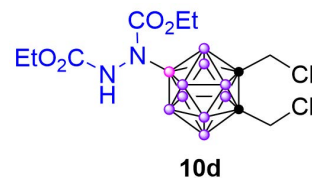

$^{11}\text{B}\{^1\text{H}\}$  NMR (128 MHz,  $\text{CDCl}_3$ )

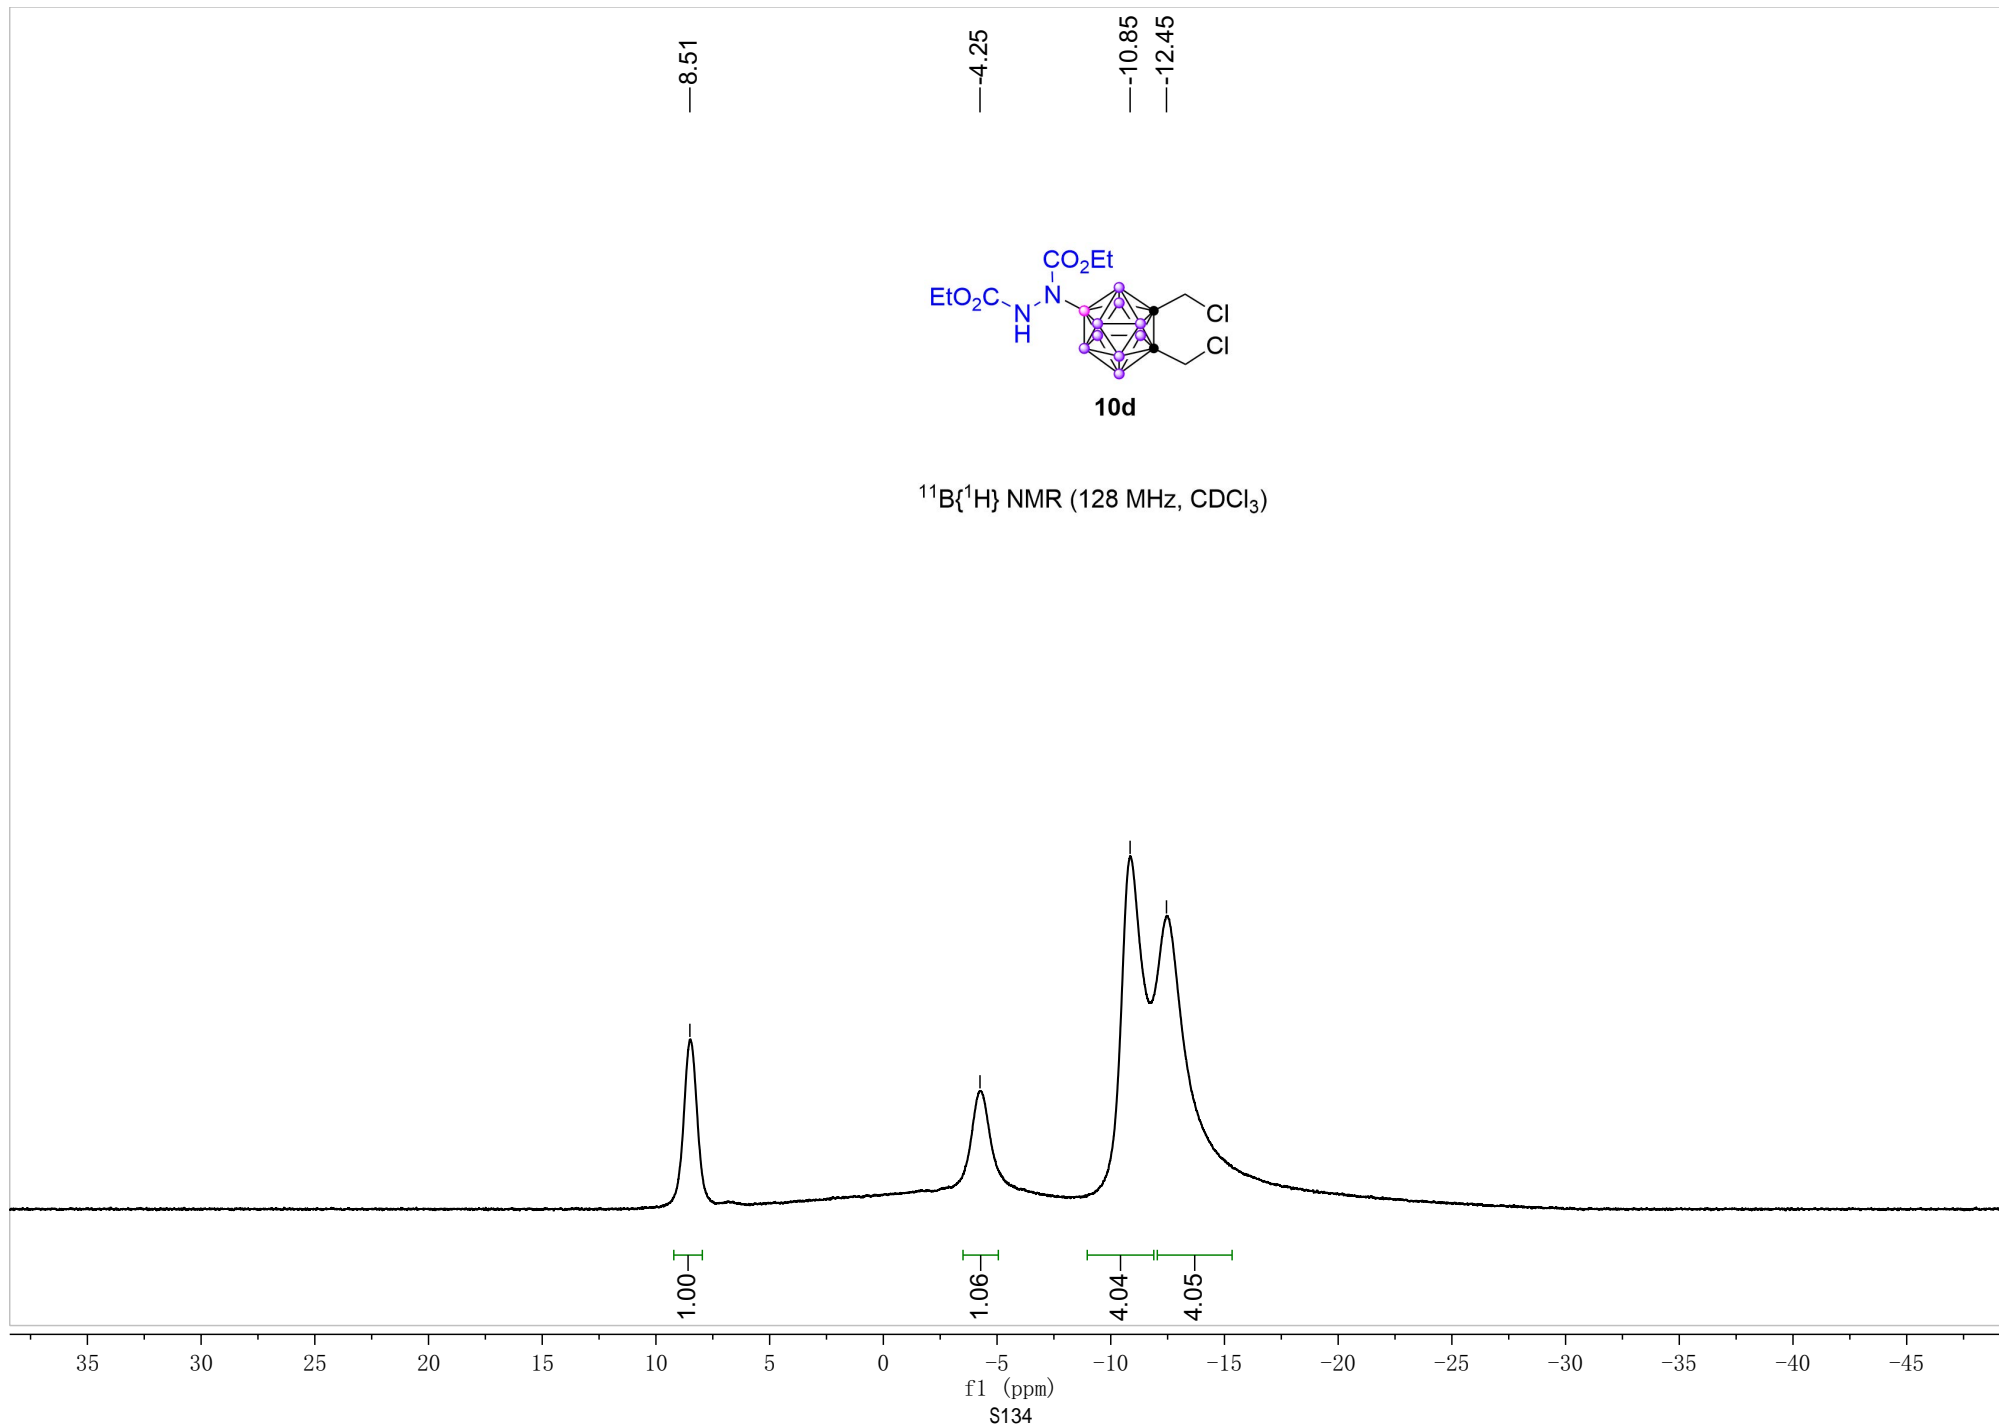



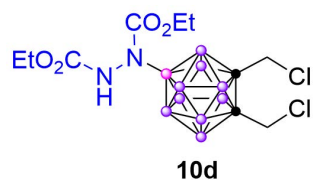

$^{13}\text{C}$  NMR (101 MHz,  $\text{CDCl}_3$ )

157.85  
156.41

77.32  
77.00  
76.68  
72.68  
68.41  
62.41  
61.65

43.85  
42.86

14.43  
14.30

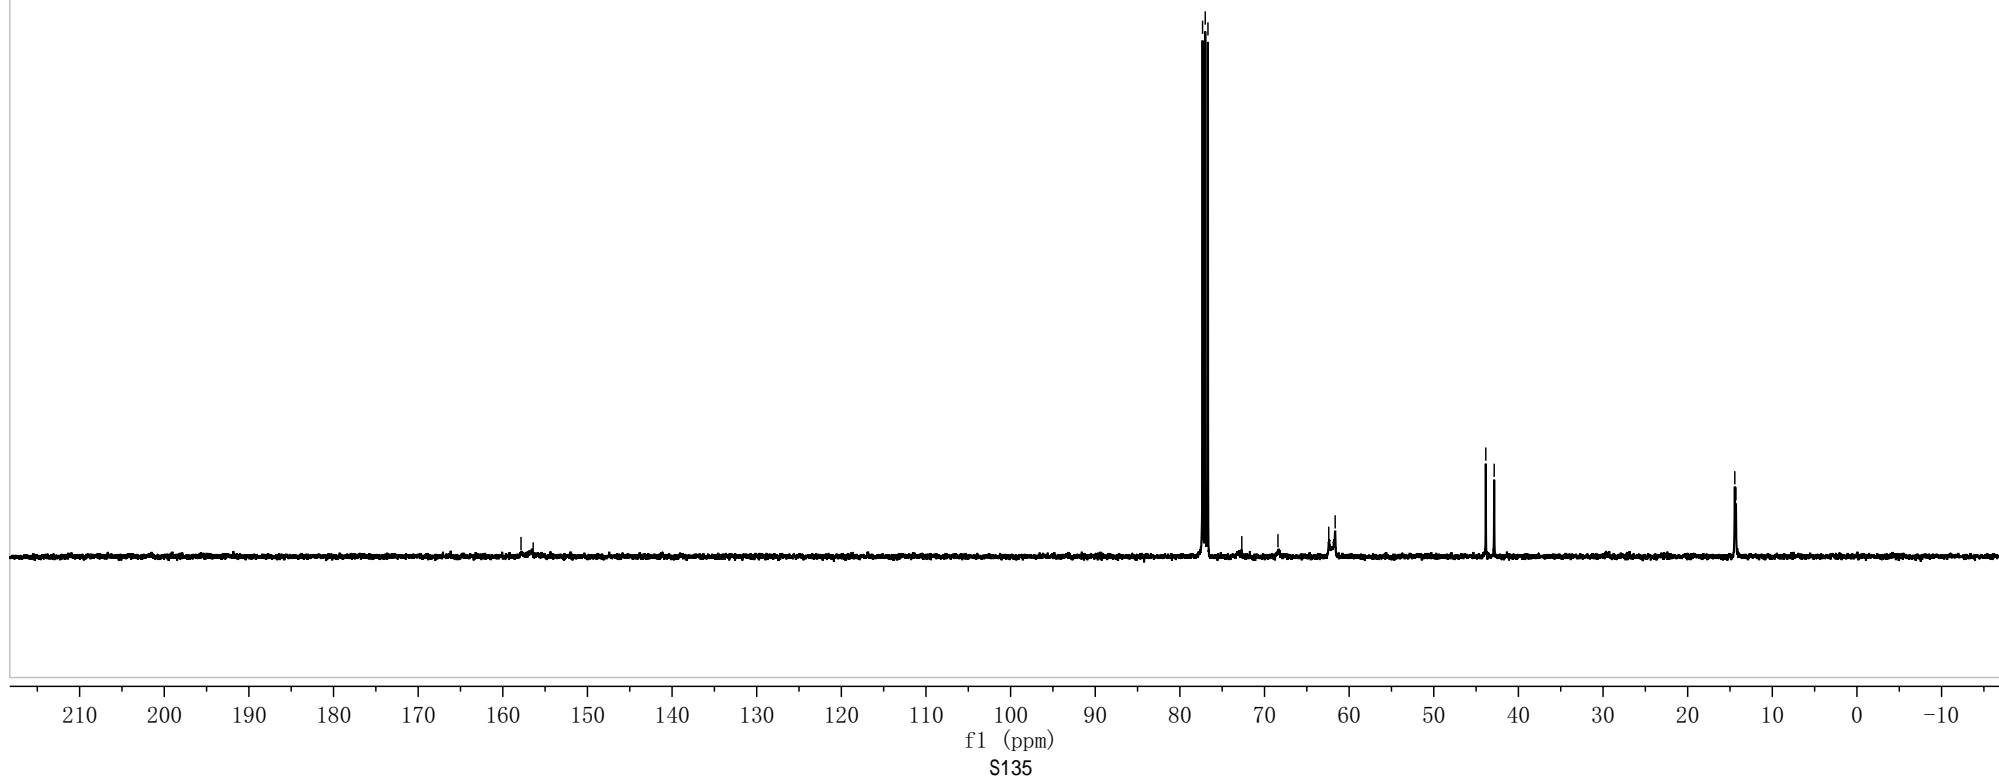

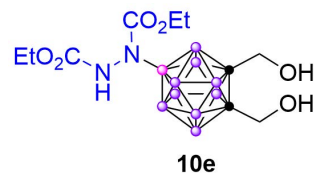

<sup>1</sup>H NMR (400 MHz, CDCl<sub>3</sub>)

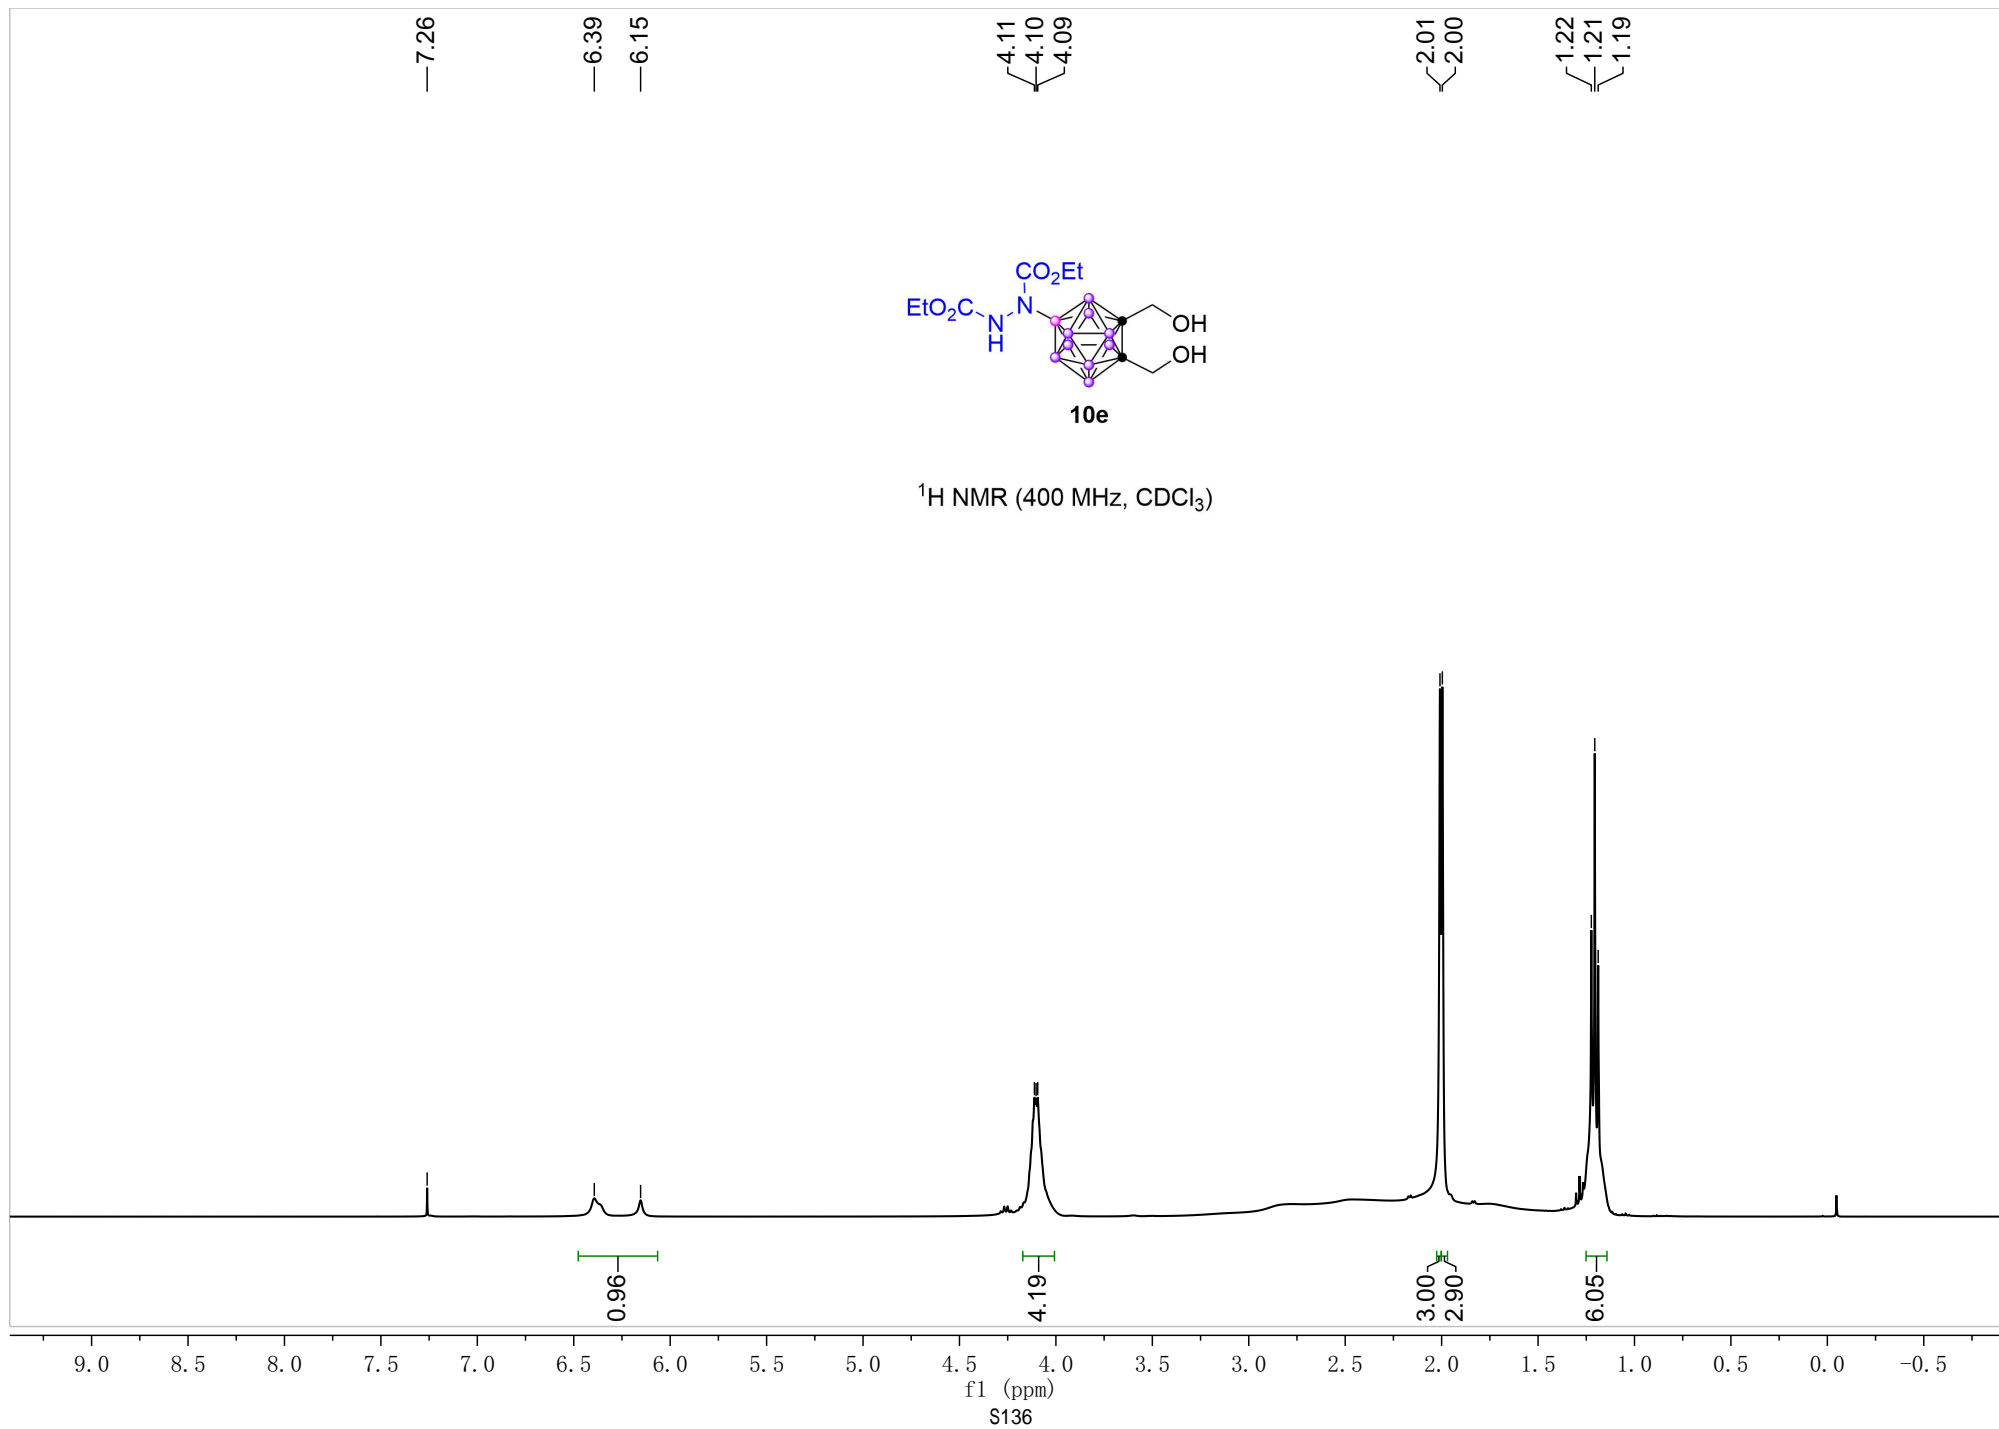

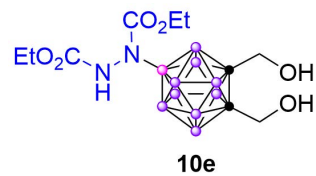

$^1\text{H}\{^{11}\text{B}\}$  NMR (400 MHz,  $\text{CDCl}_3$ )

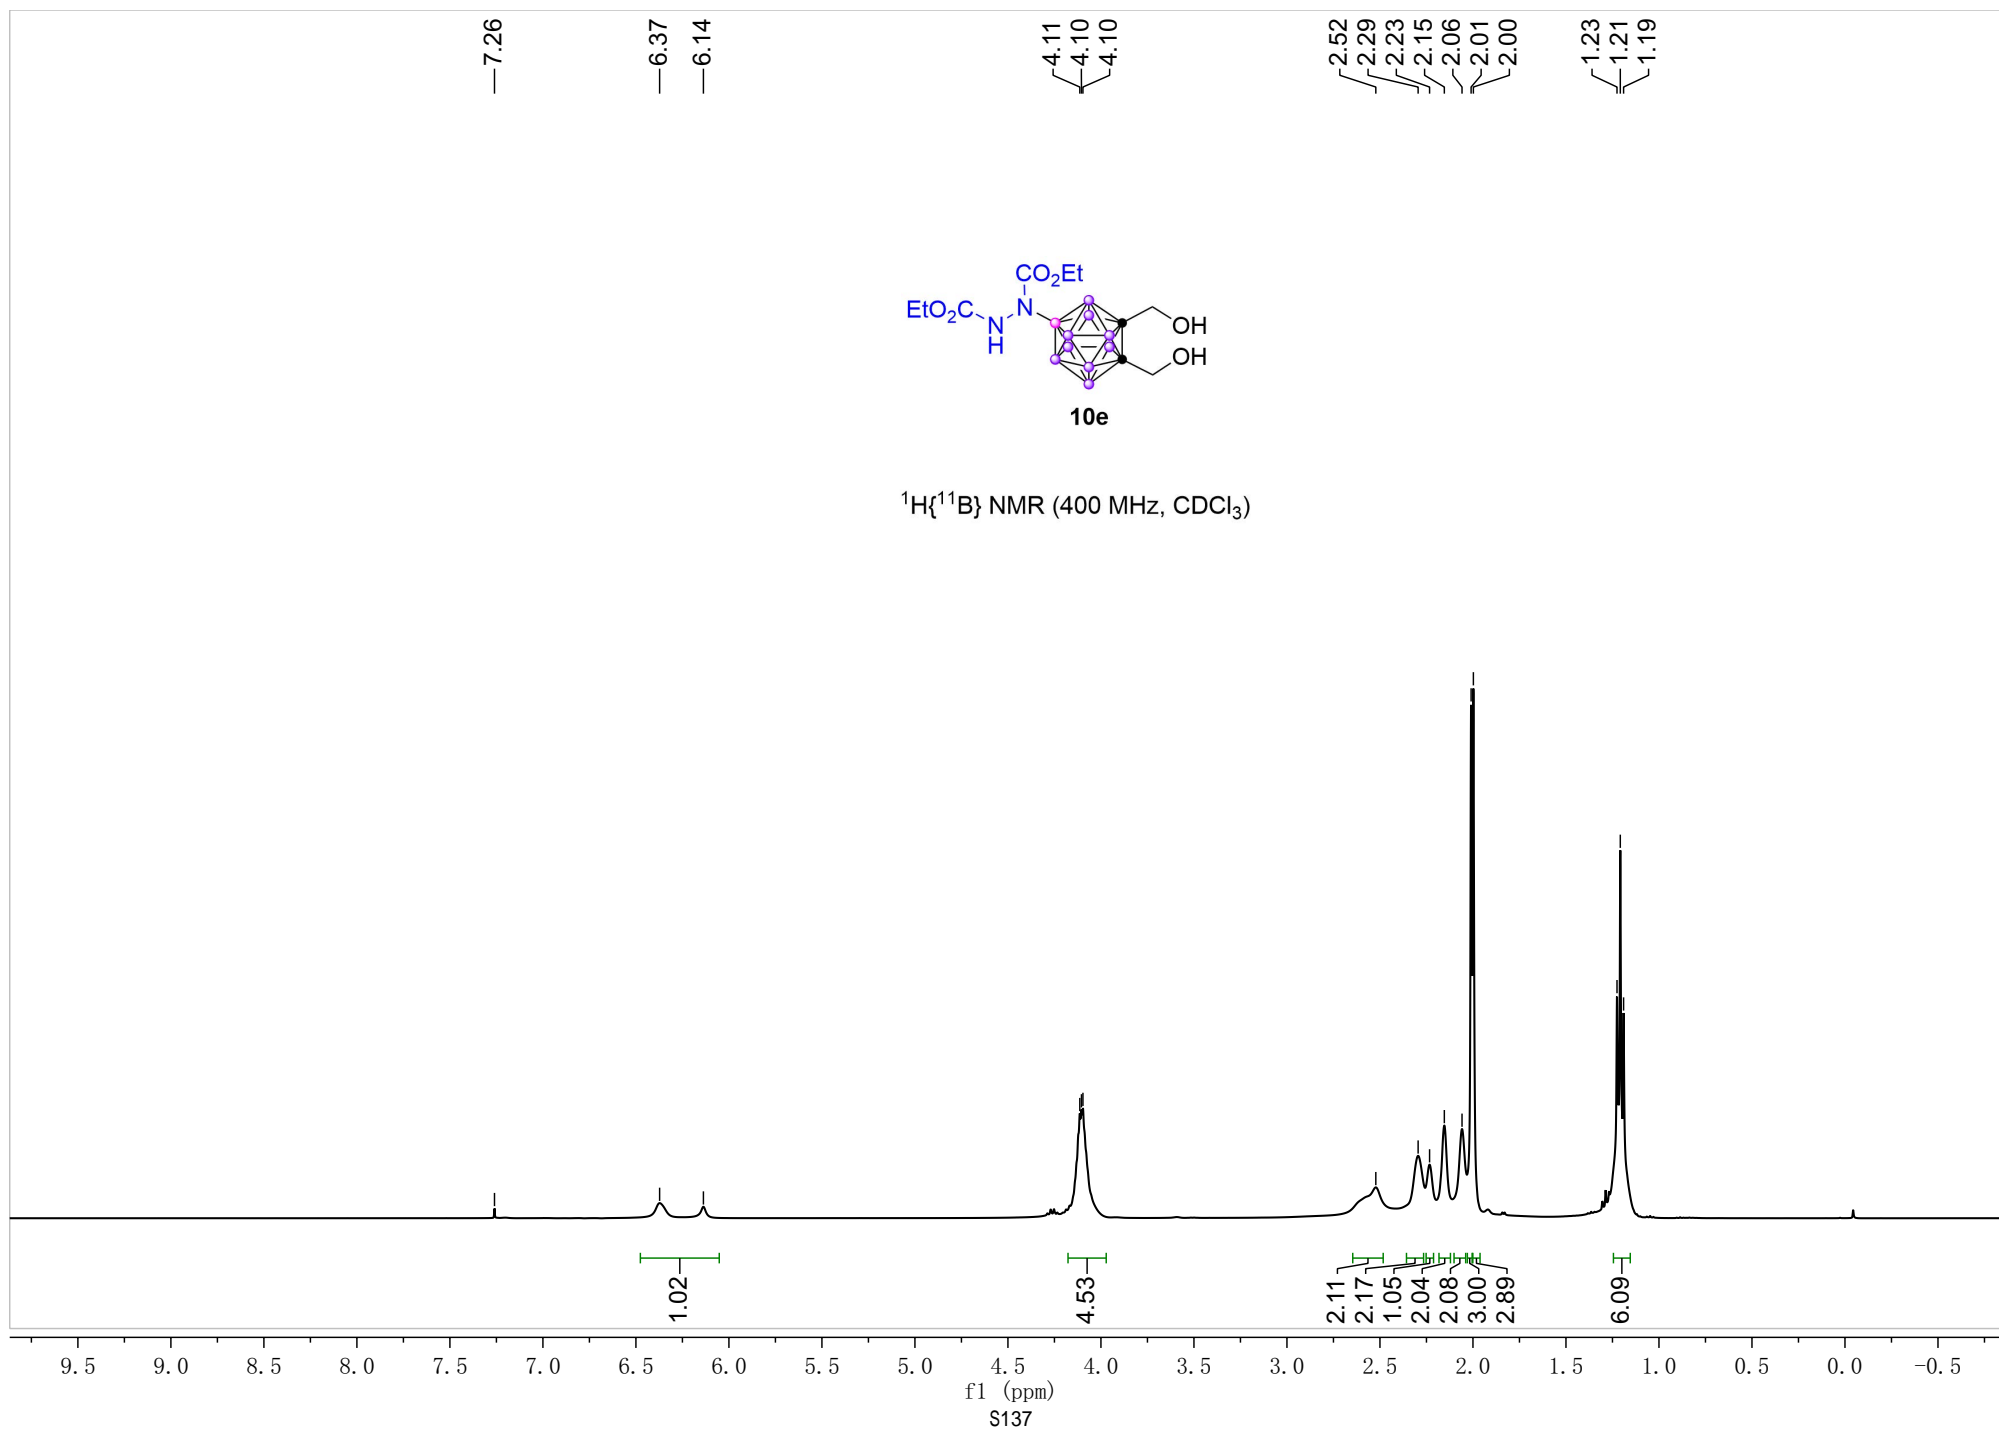

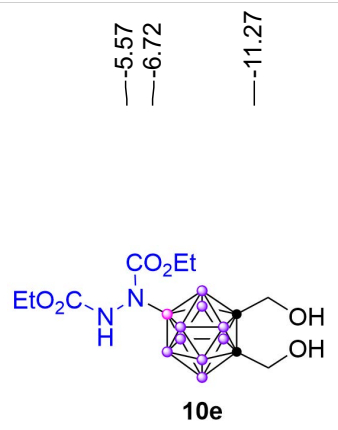

<sup>11</sup>B NMR (128 MHz, CDCl<sub>3</sub>)

6.66  
5.57  
6.72  
11.27

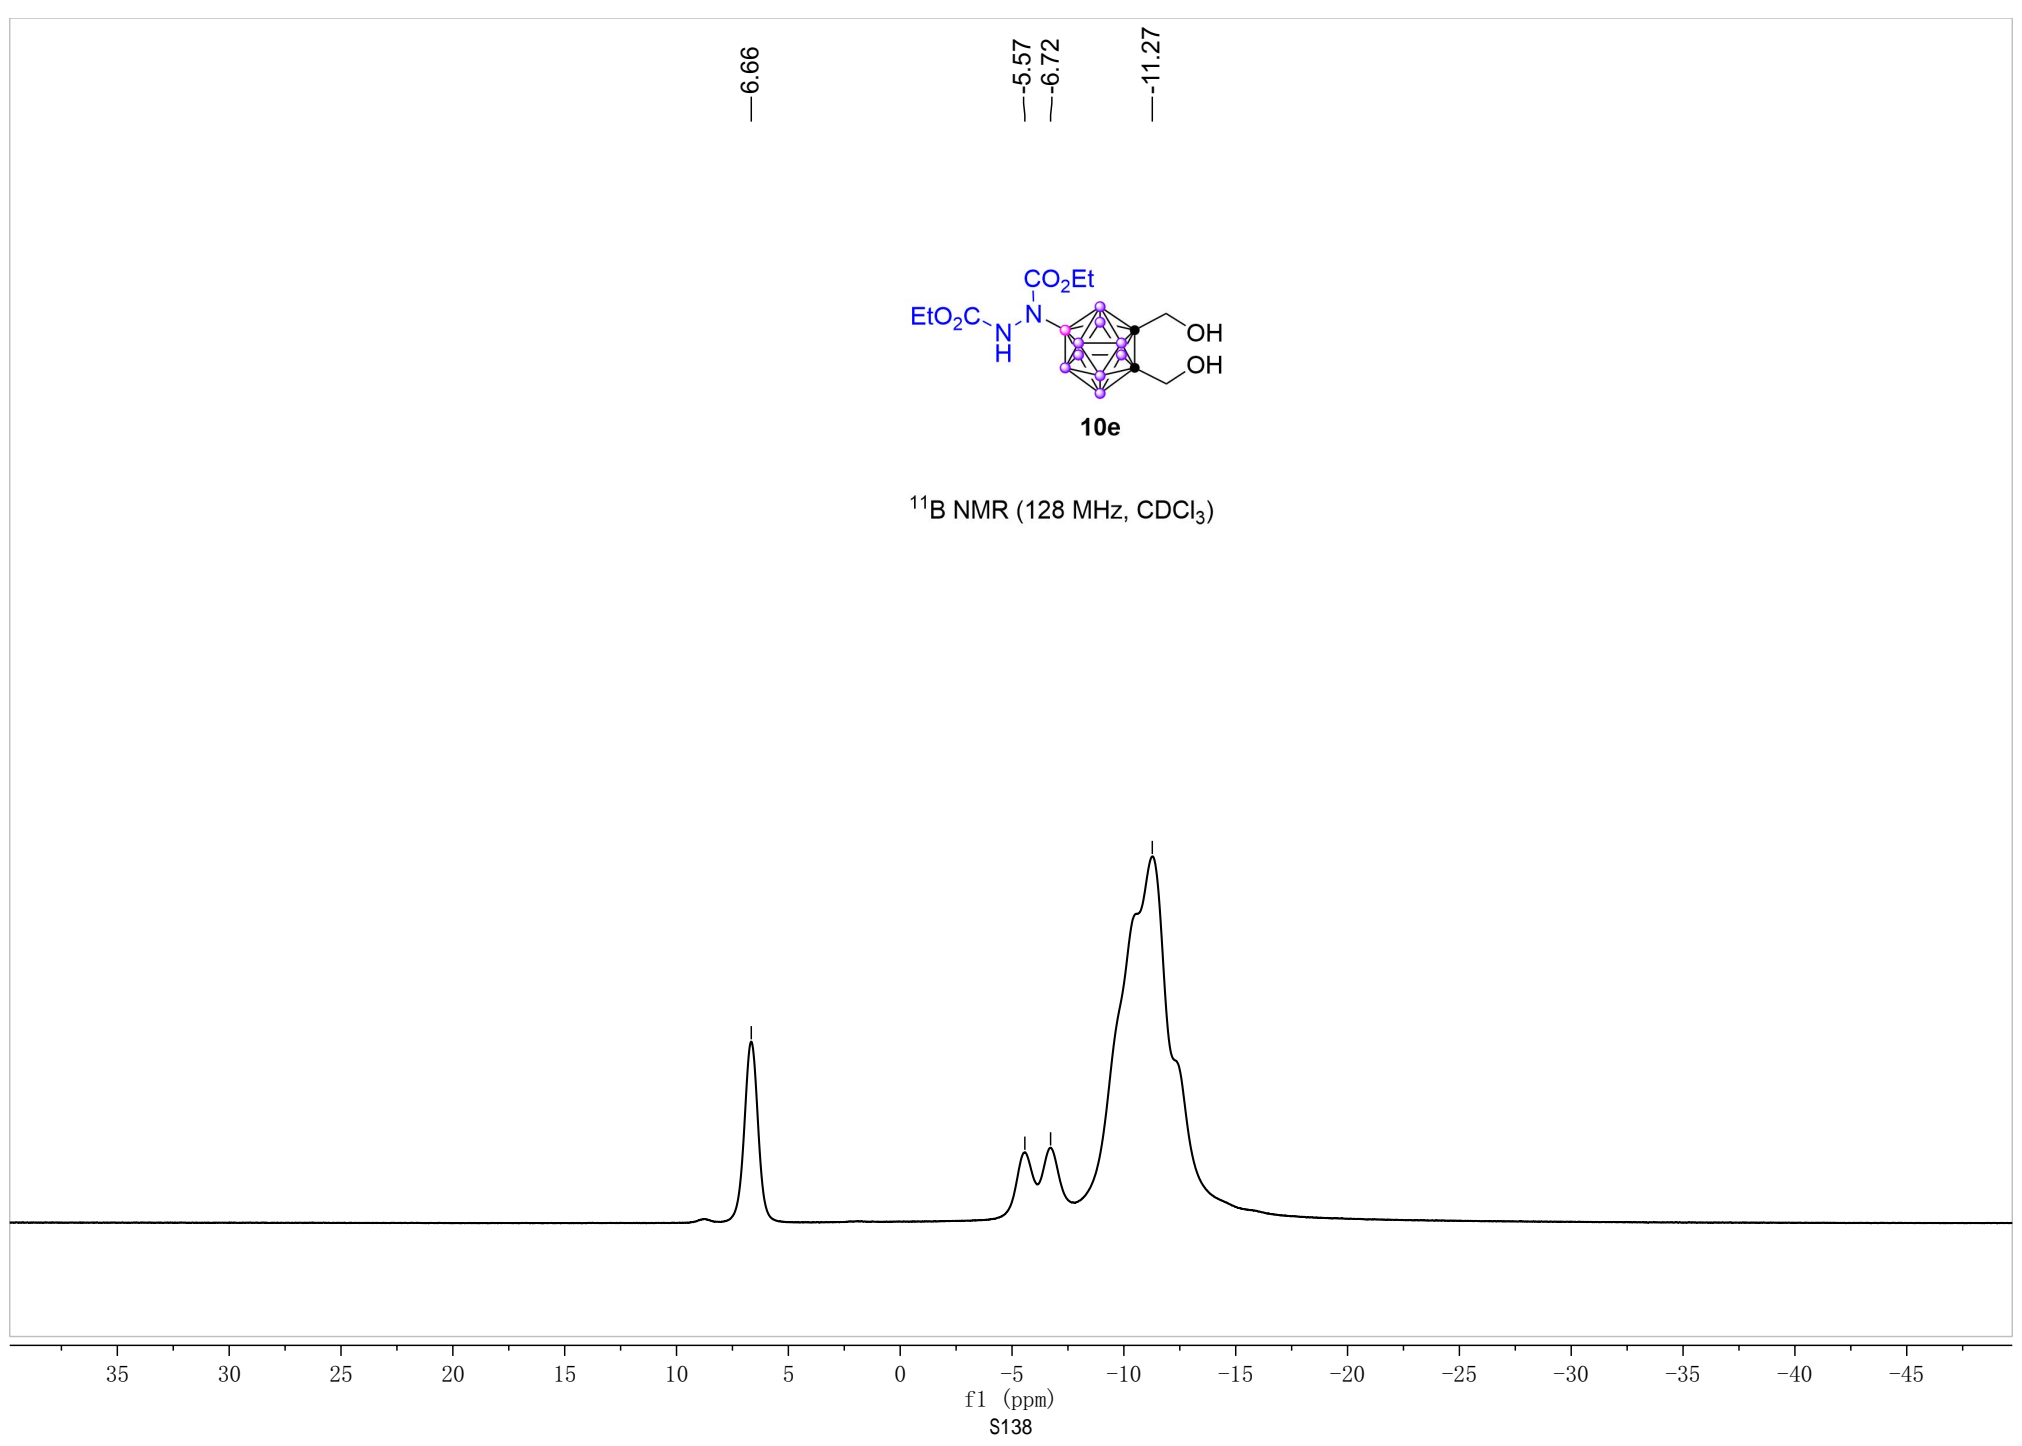

—6.67  
—6.16  
—10.91

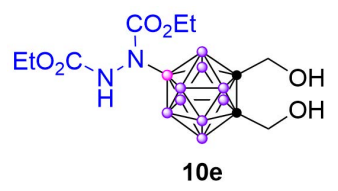

$^{11}\text{B}\{^1\text{H}\}$  NMR (128 MHz,  $\text{CDCl}_3$ )

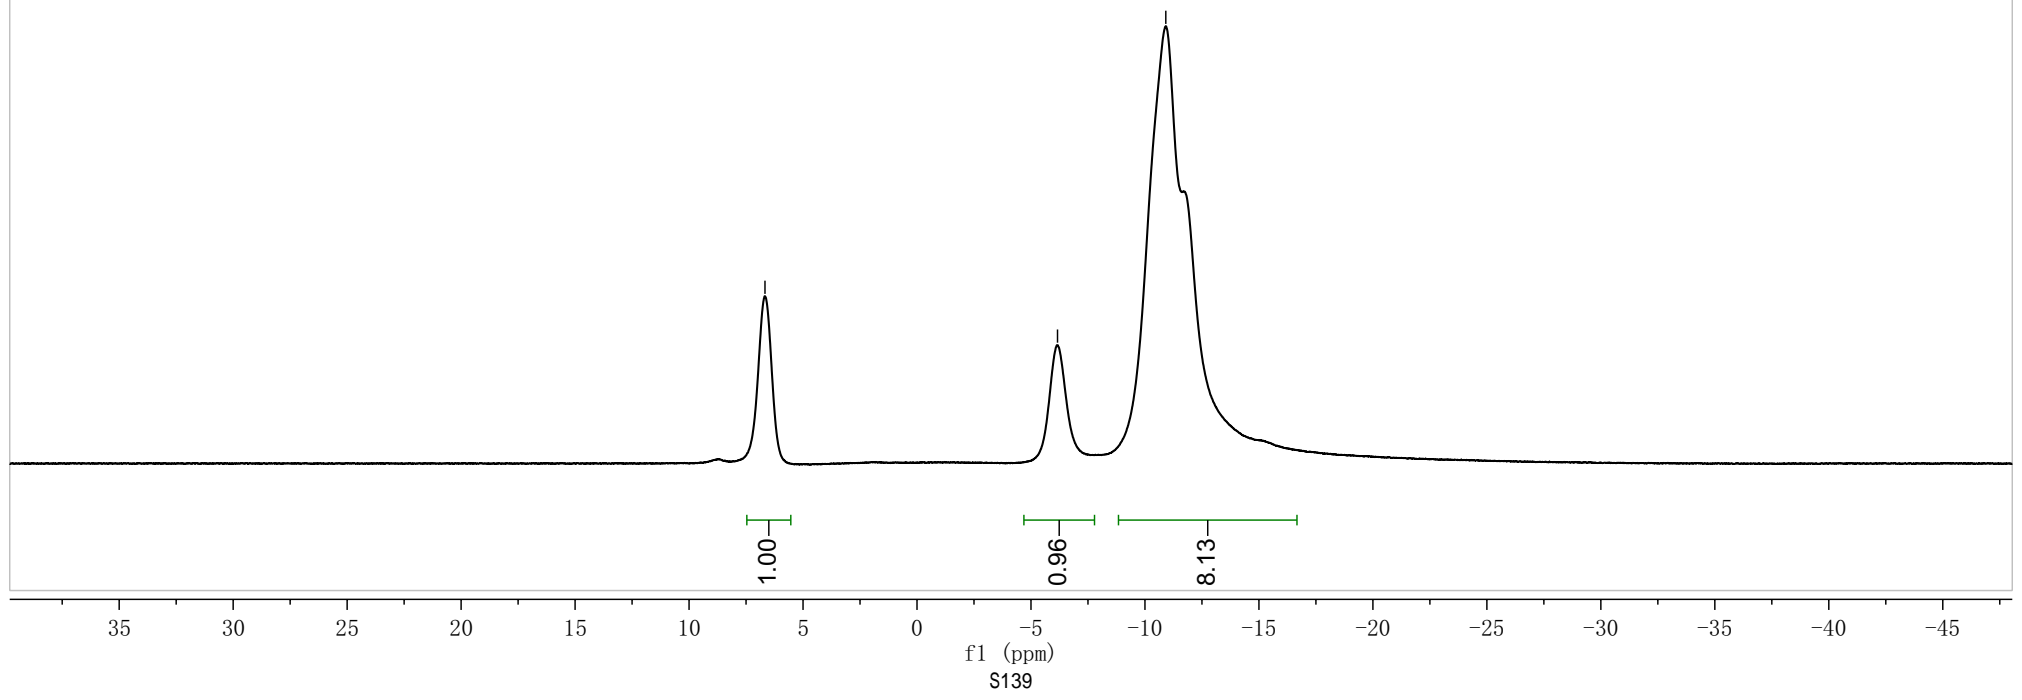

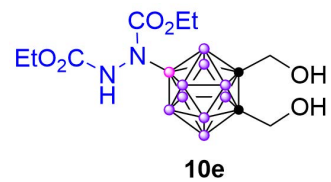

<sup>13</sup>C NMR (101 MHz, CDCl<sub>3</sub>)

~157.96  
~156.25

77.32  
77.00  
76.68  
69.45  
64.35  
62.00  
61.30

~23.47  
~21.36  
14.34  
14.18

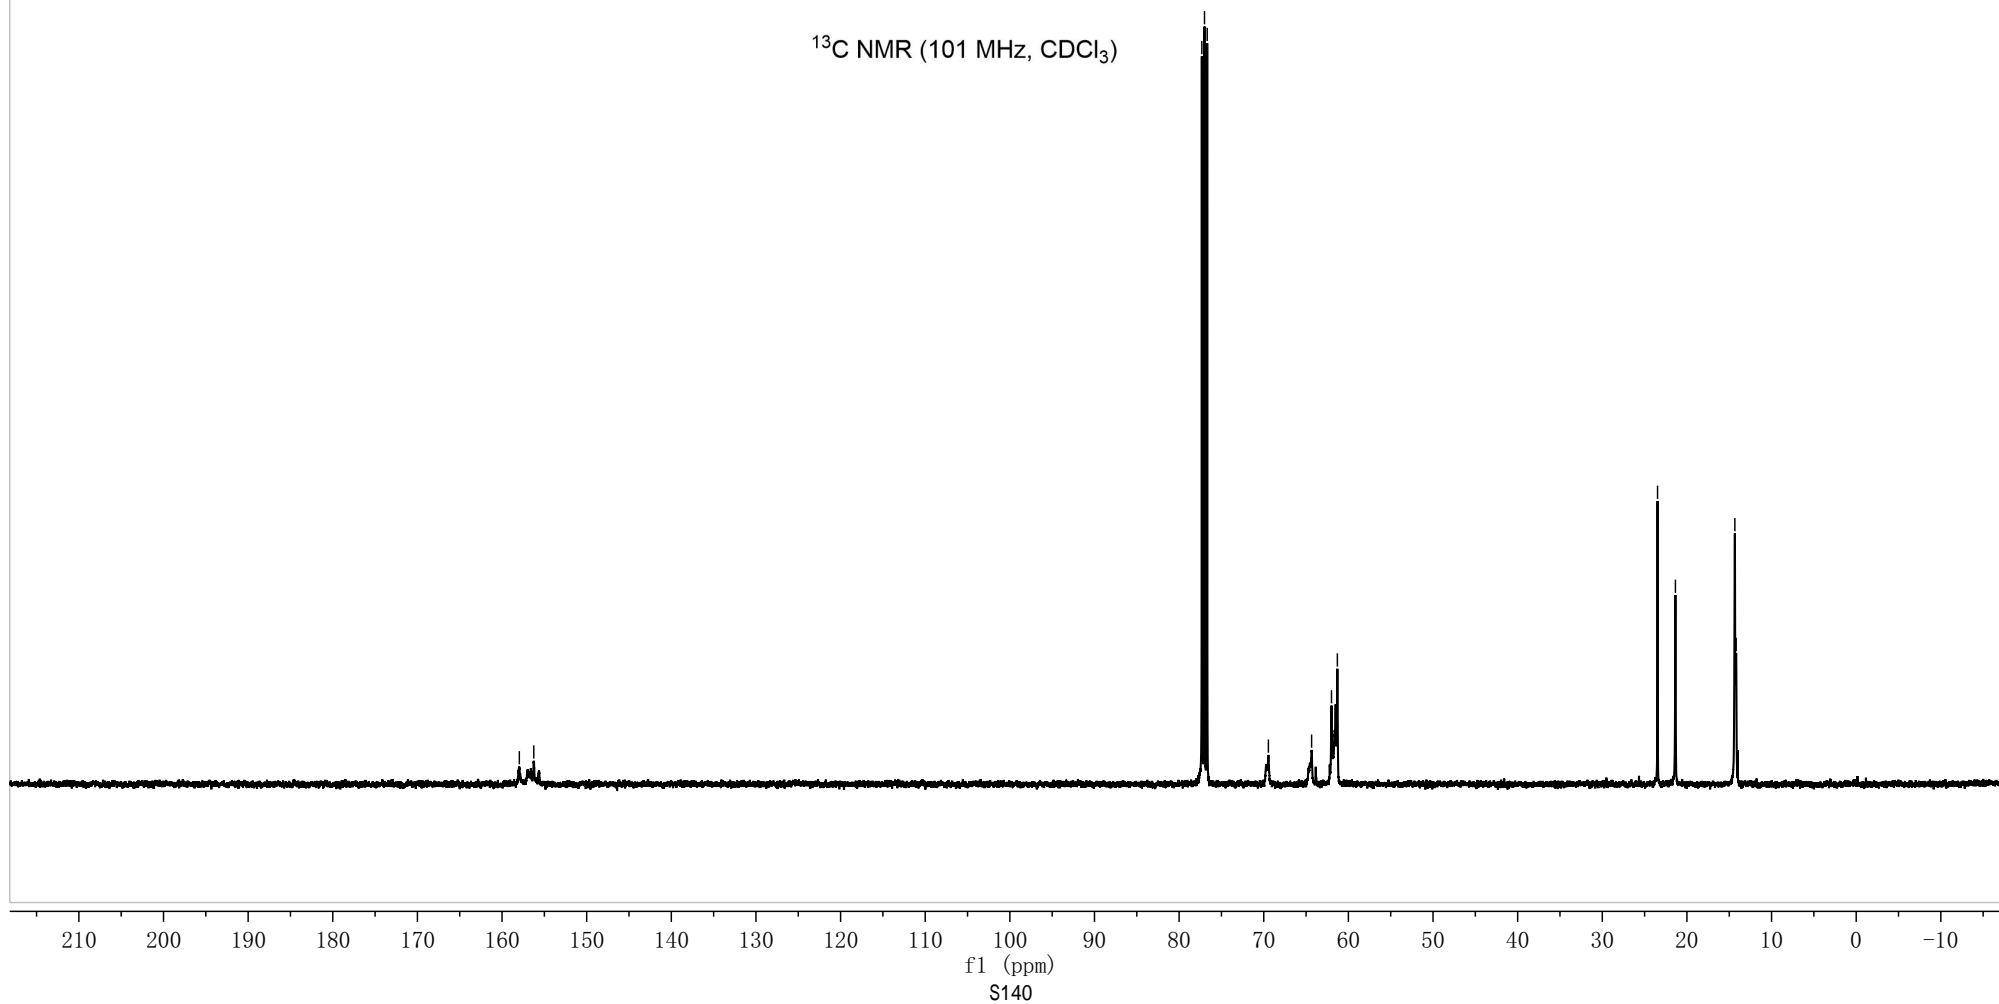

7.58  
7.56  
7.54  
7.45  
7.43  
7.26

6.46  
6.39  
6.19

4.20  
4.18  
4.16

1.28  
1.26  
1.25

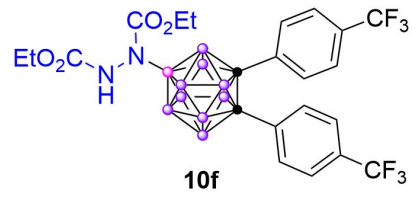

<sup>1</sup>H NMR (400 MHz, CDCl<sub>3</sub>)

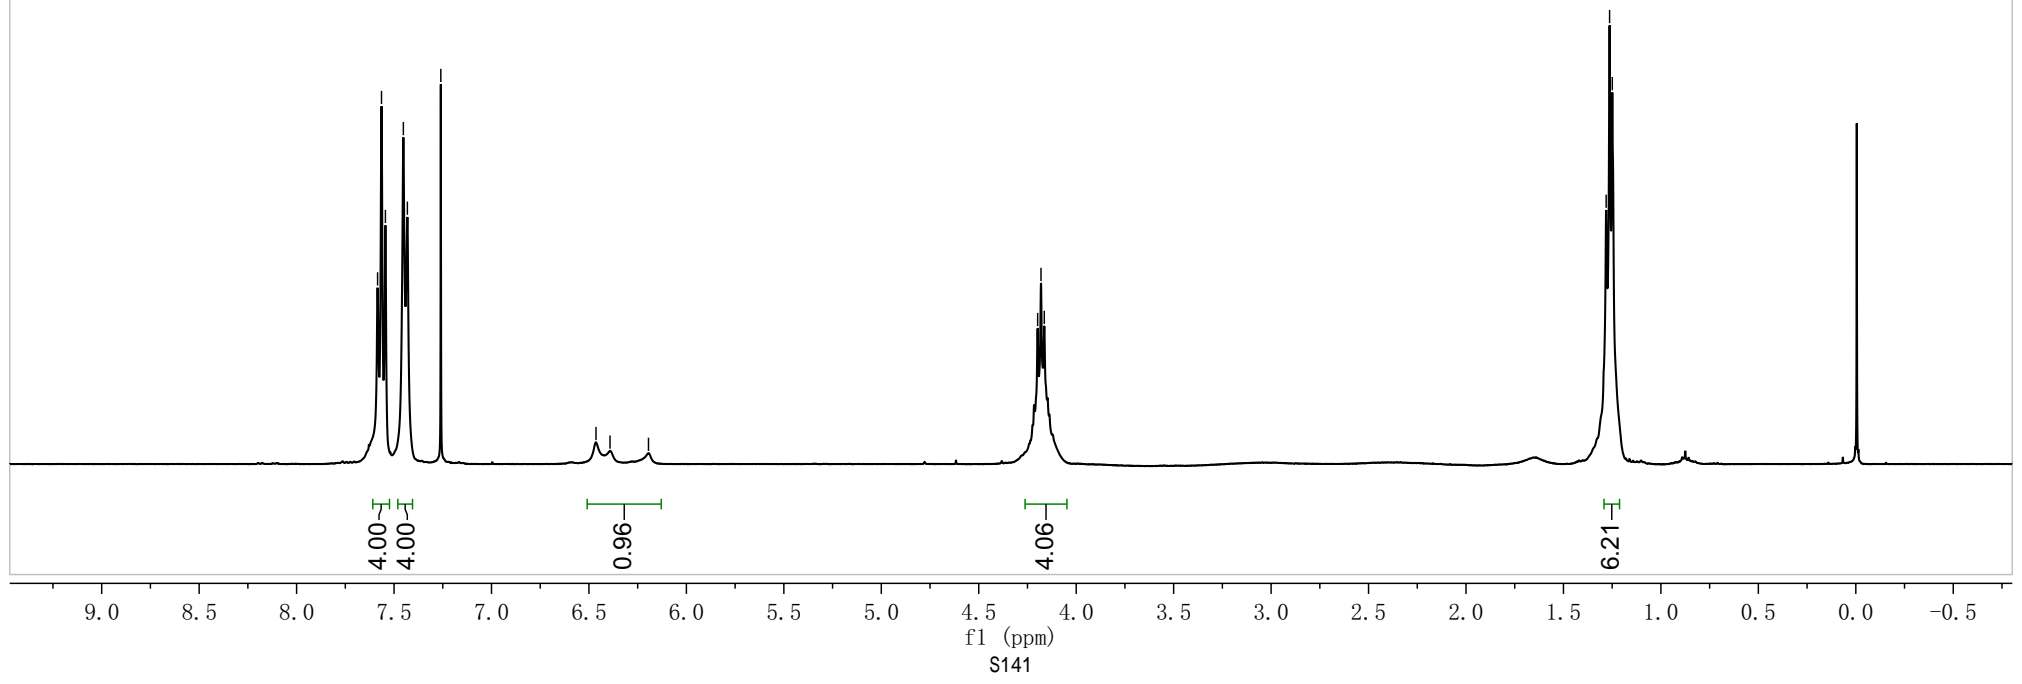

7.58  
7.56  
7.54  
7.45  
7.43  
7.26

6.46  
6.39  
6.19

4.20  
4.18  
4.16

3.21  
2.77  
2.68  
2.62  
2.46

1.28  
1.26  
1.25

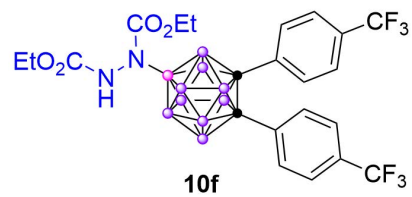

$^1\text{H}\{^{11}\text{B}\}$  NMR (400 MHz,  $\text{CDCl}_3$ )

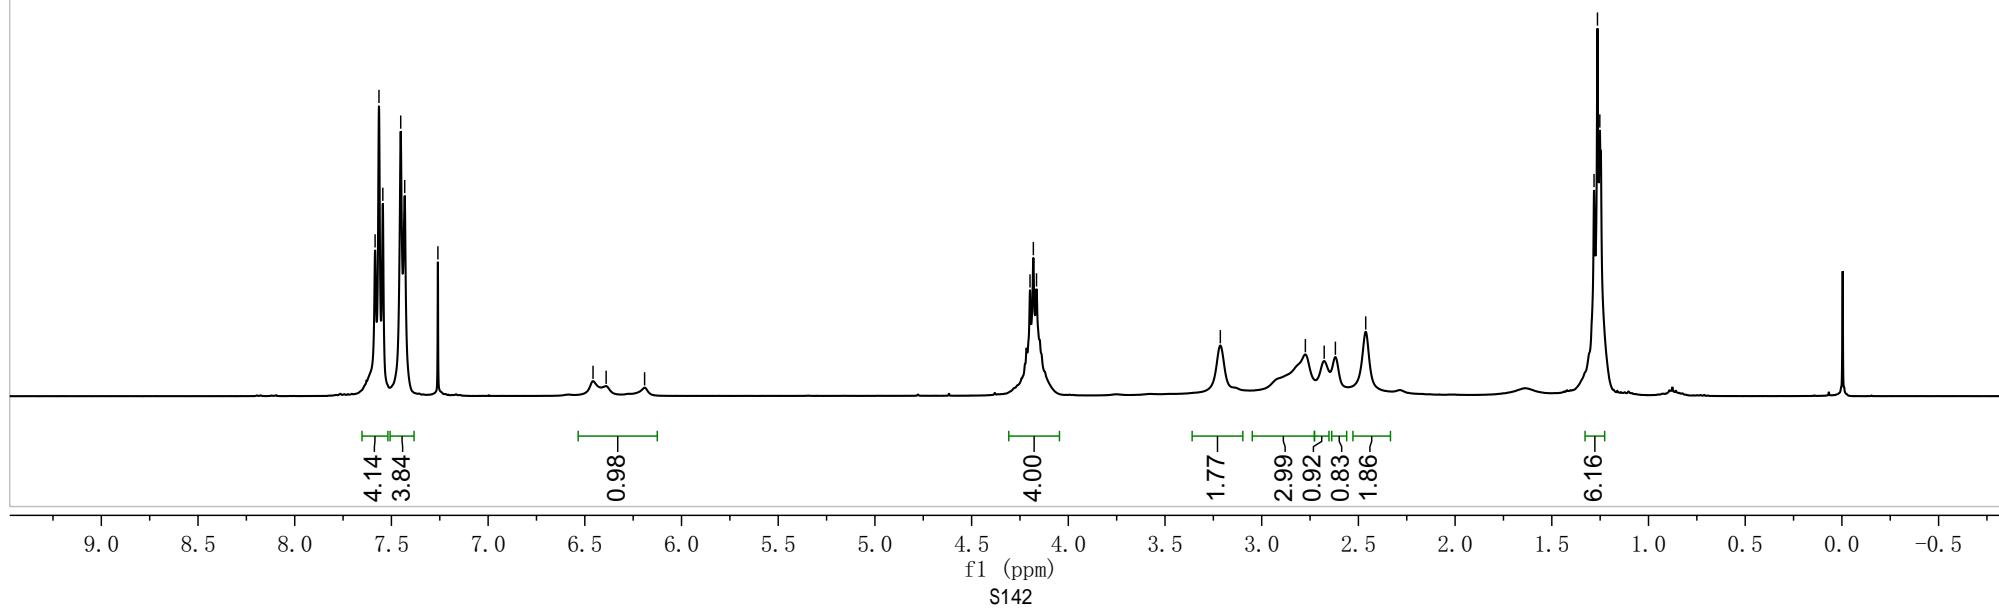



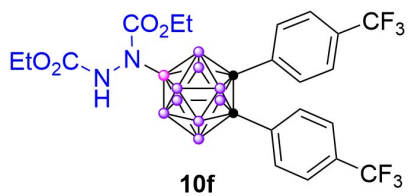

$^{11}\text{B}$  NMR (128 MHz,  $\text{CDCl}_3$ )

—9.77

—2.59  
—3.28

—10.93

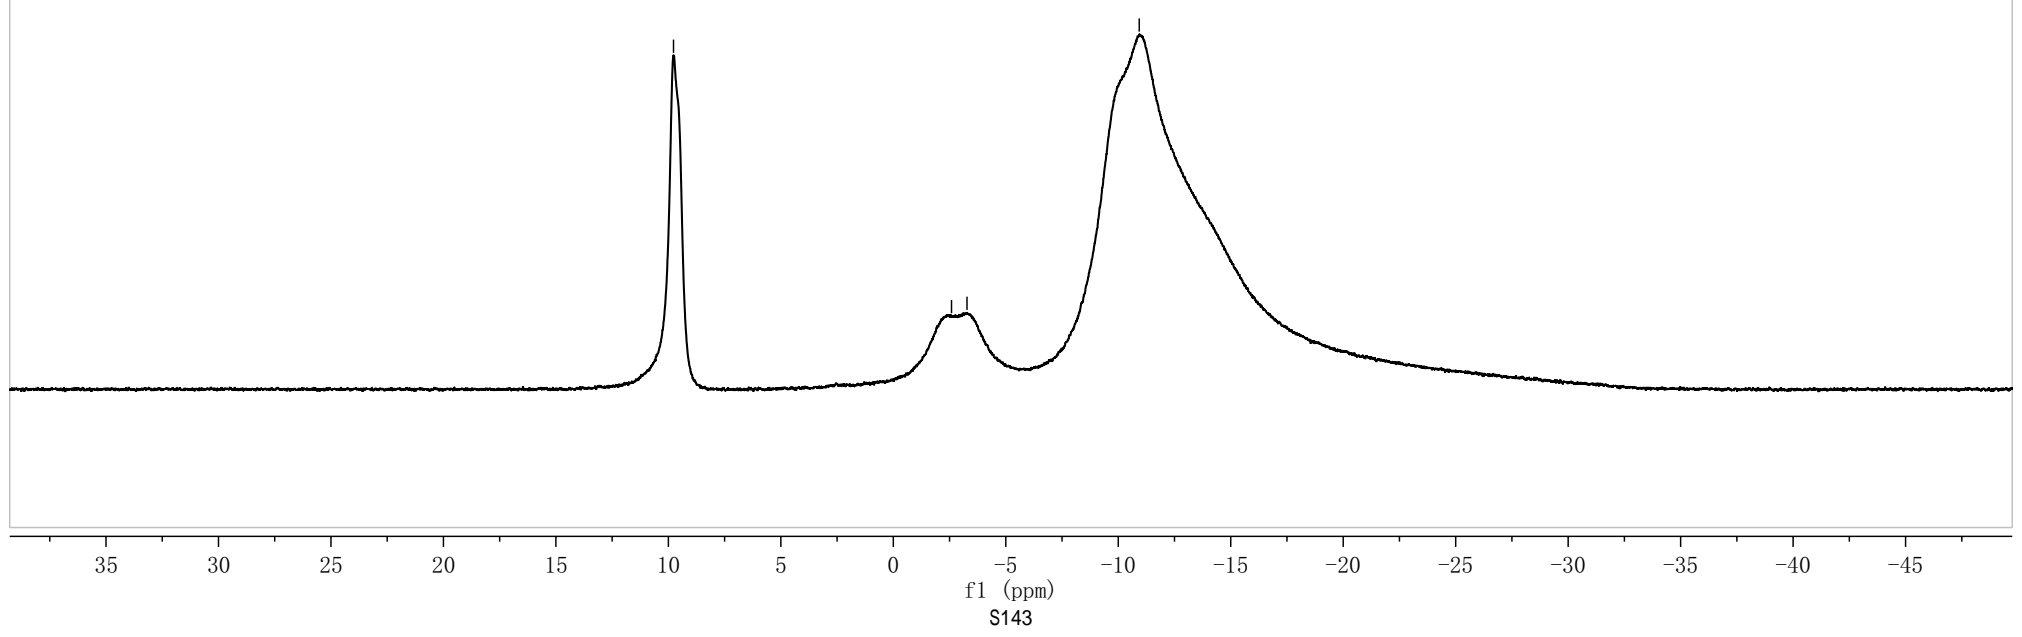

9.73  
-2.99  
-10.65

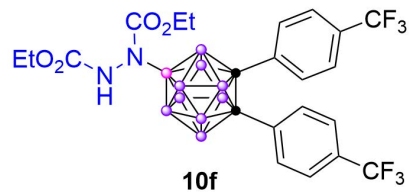

$^{11}\text{B}\{^1\text{H}\}$  NMR (128 MHz,  $\text{CDCl}_3$ )

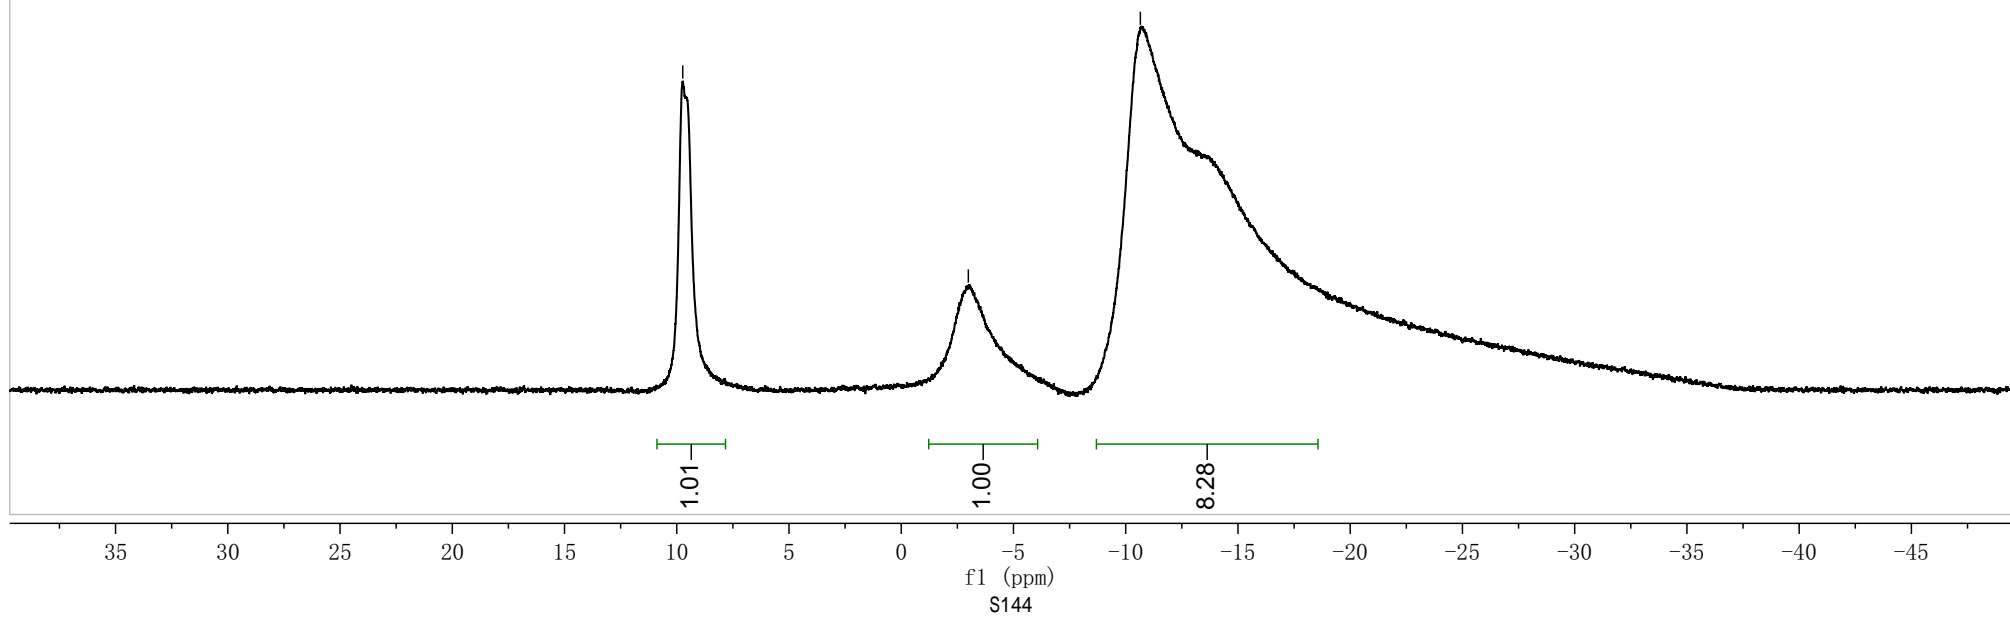

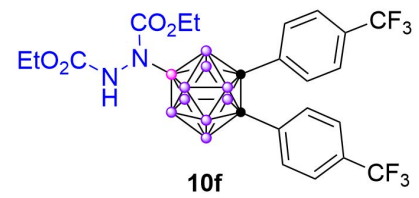

$^{19}\text{F}$  NMR (377 MHz,  $\text{CDCl}_3$ )

-63.22  
-63.23

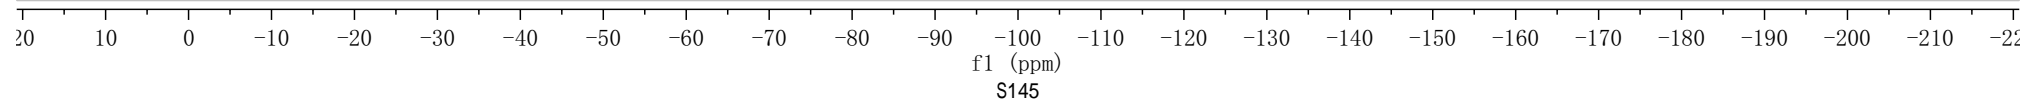

157.89  
156.64

133.55  
132.84  
132.47  
132.16  
131.24  
130.95  
127.20  
125.60  
125.57  
124.48  
121.77  
119.06

79.39  
77.32  
77.00  
76.68  
74.38  
62.42  
61.69

14.45  
14.33

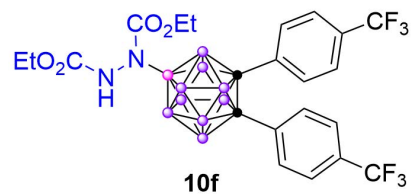

$^{13}\text{C}$  NMR (101 MHz,  $\text{CDCl}_3$ )

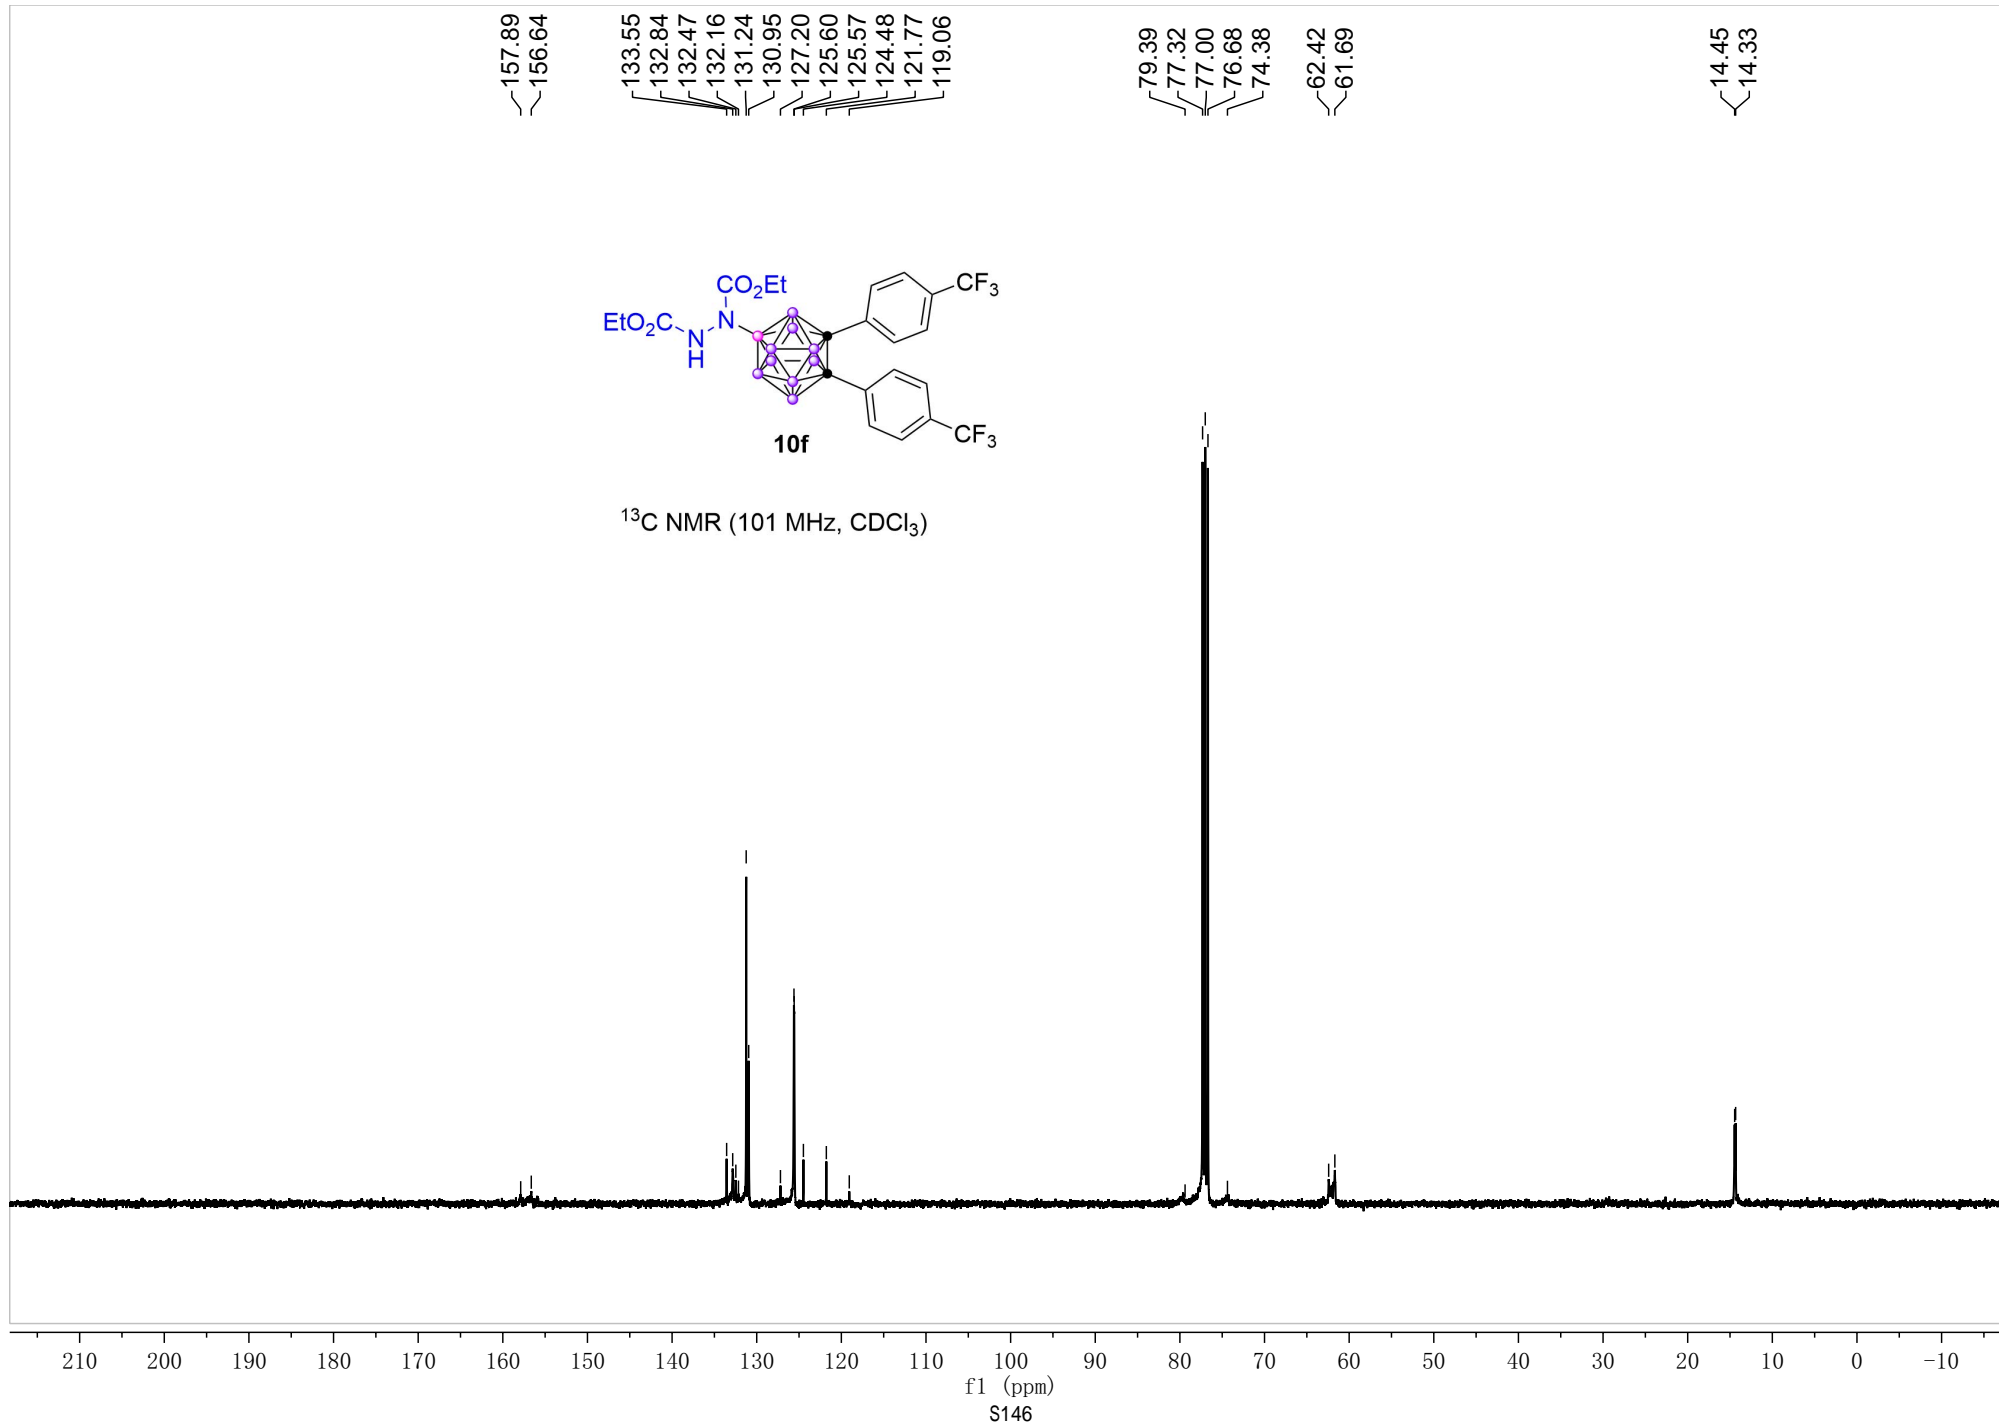

7.43  
7.42  
7.41  
7.41  
7.40  
7.40  
7.39  
7.38  
7.38  
7.26  
6.86  
6.84  
6.82  
6.47  
6.40  
6.20

4.19  
4.17  
4.16

1.27  
1.25  
1.25  
1.24

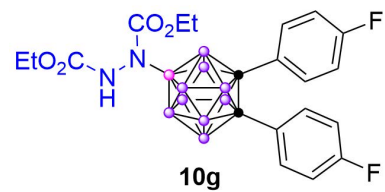

$^1\text{H}$  NMR (400 MHz,  $\text{CDCl}_3$ )

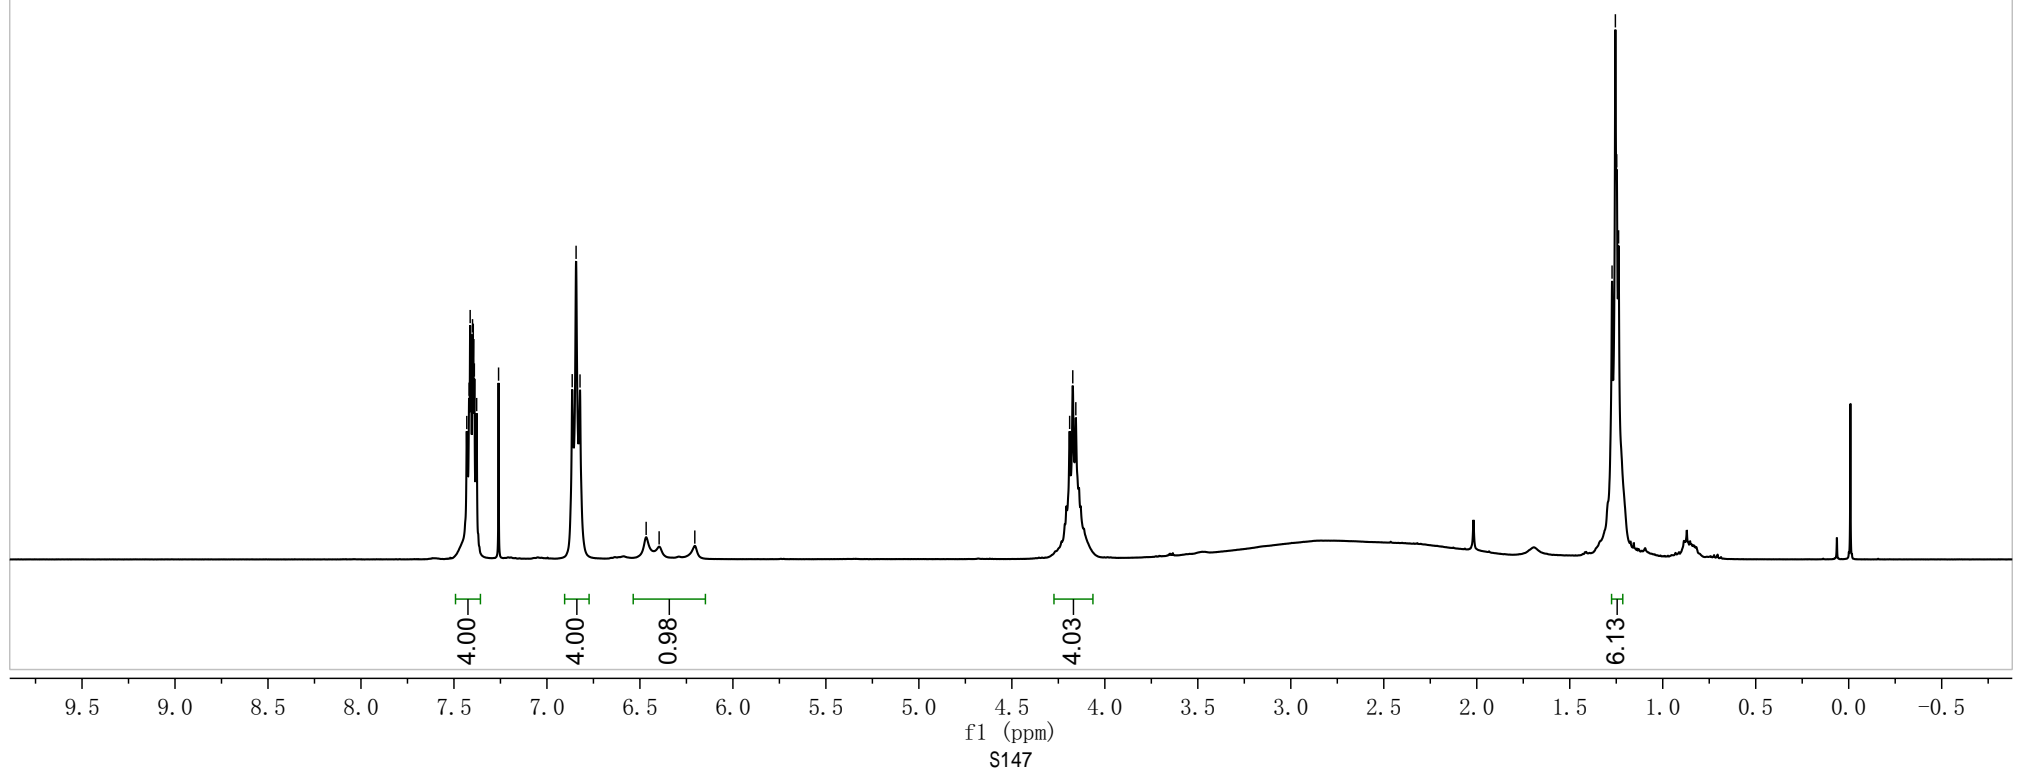

7.43  
7.41  
7.40  
7.38  
7.26  
6.86  
6.84  
6.82  
6.45  
6.39  
6.20

4.19  
4.17  
4.16

3.12  
2.78  
2.71  
2.59  
2.54  
2.43

1.27  
1.26  
1.24

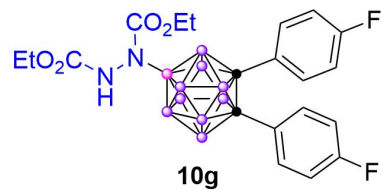

$^1\text{H}\{^{11}\text{B}\}$  NMR (400 MHz,  $\text{CDCl}_3$ )

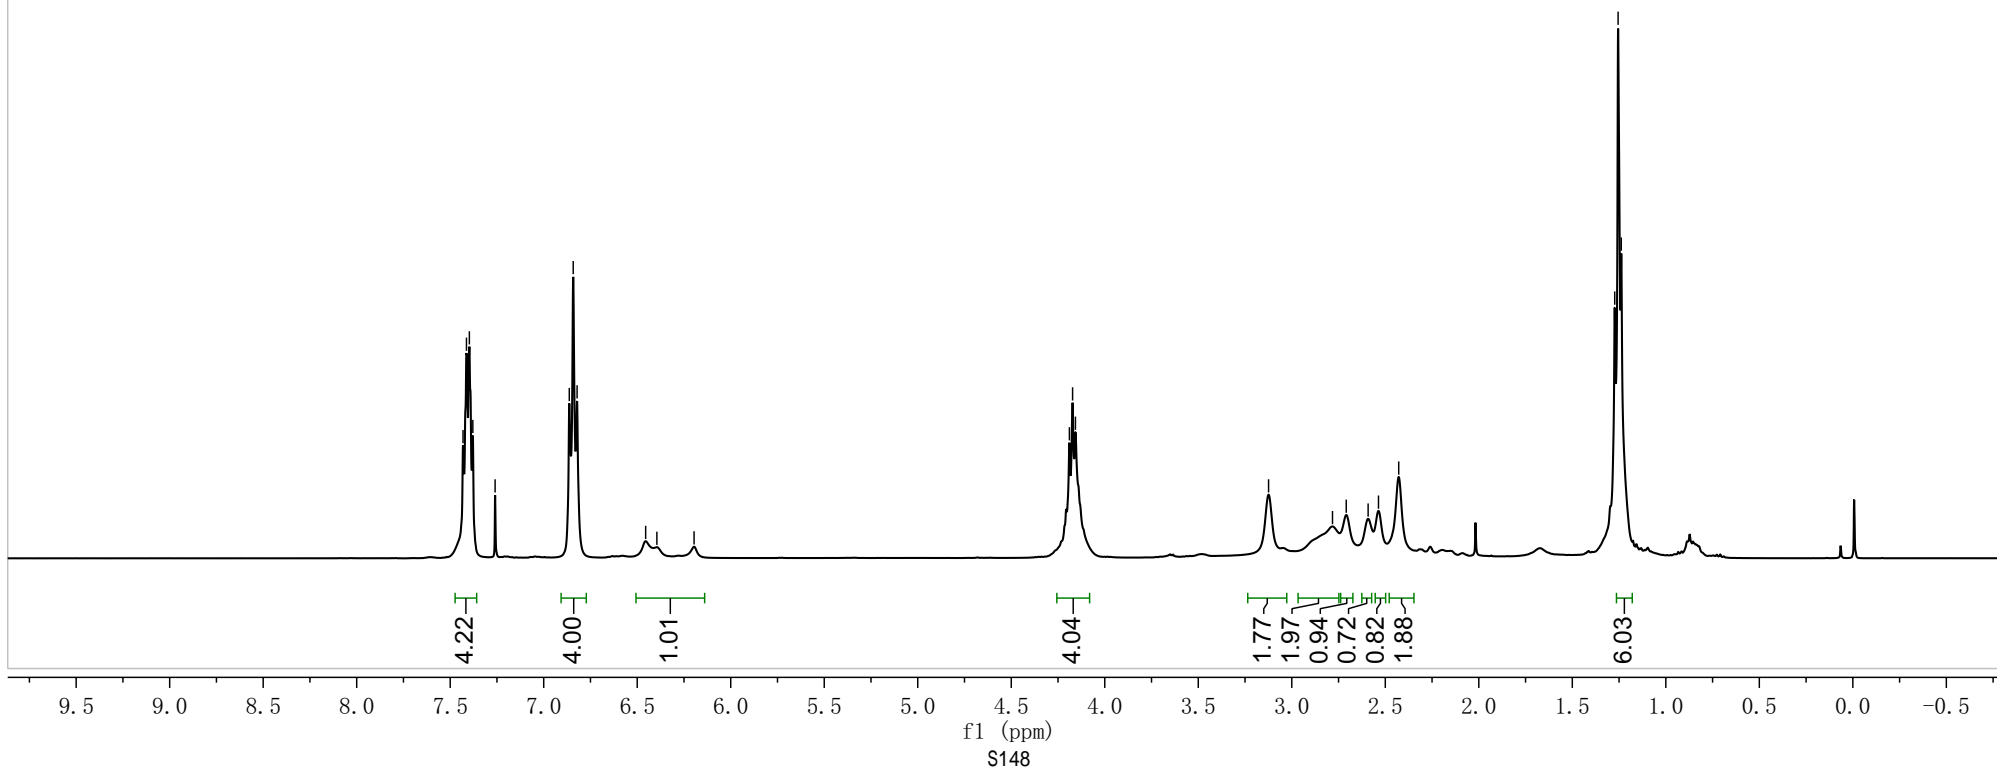

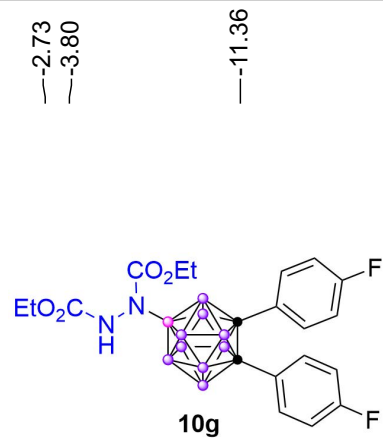

<sup>11</sup>B NMR (128 MHz, CDCl<sub>3</sub>)

—9.41

—2.73  
—3.80

—11.36

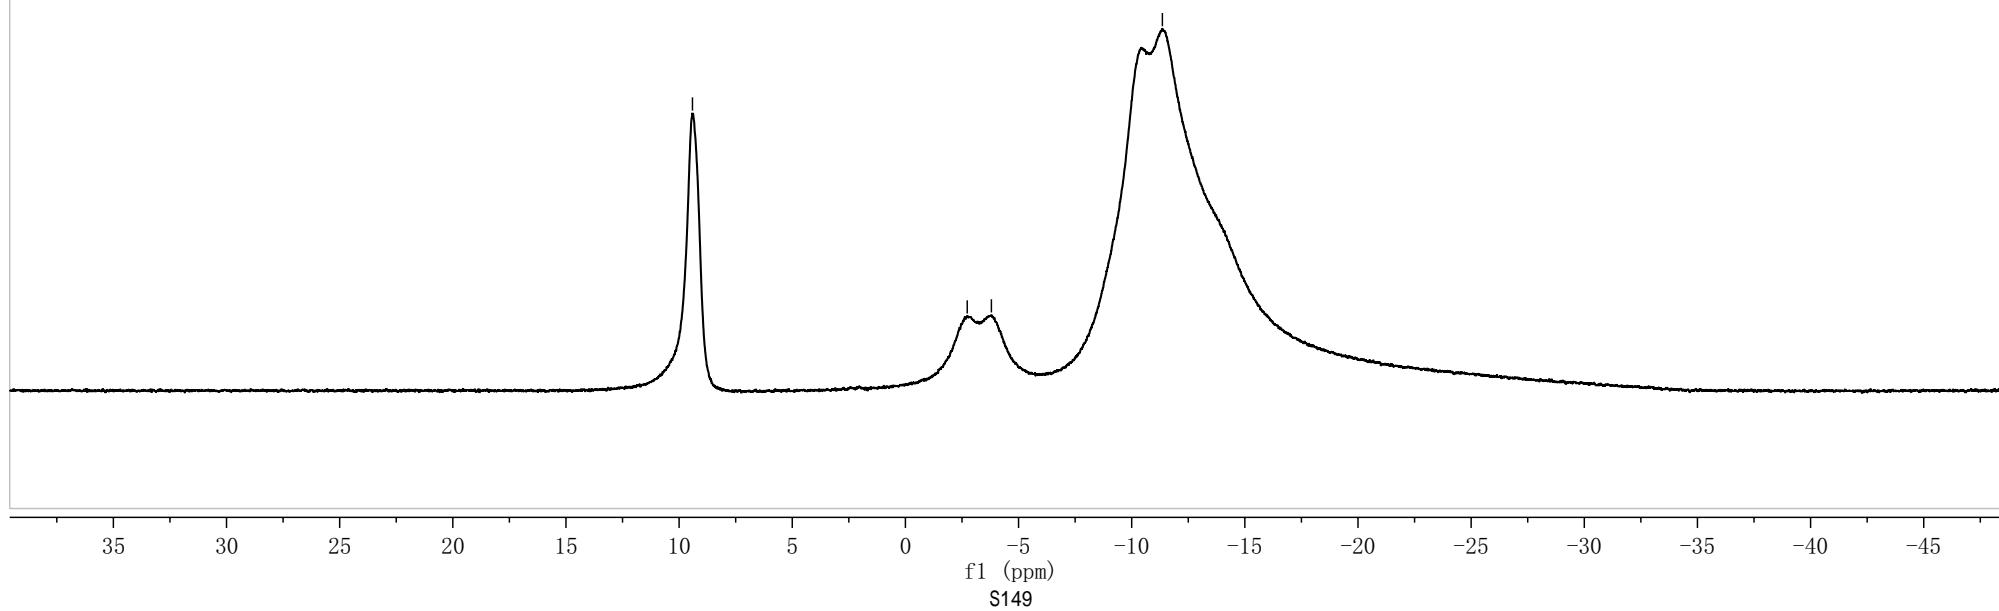

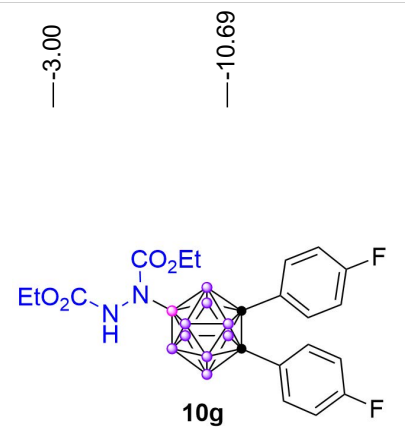

$^{11}\text{B}\{^1\text{H}\}$  NMR (128 MHz,  $\text{CDCl}_3$ )

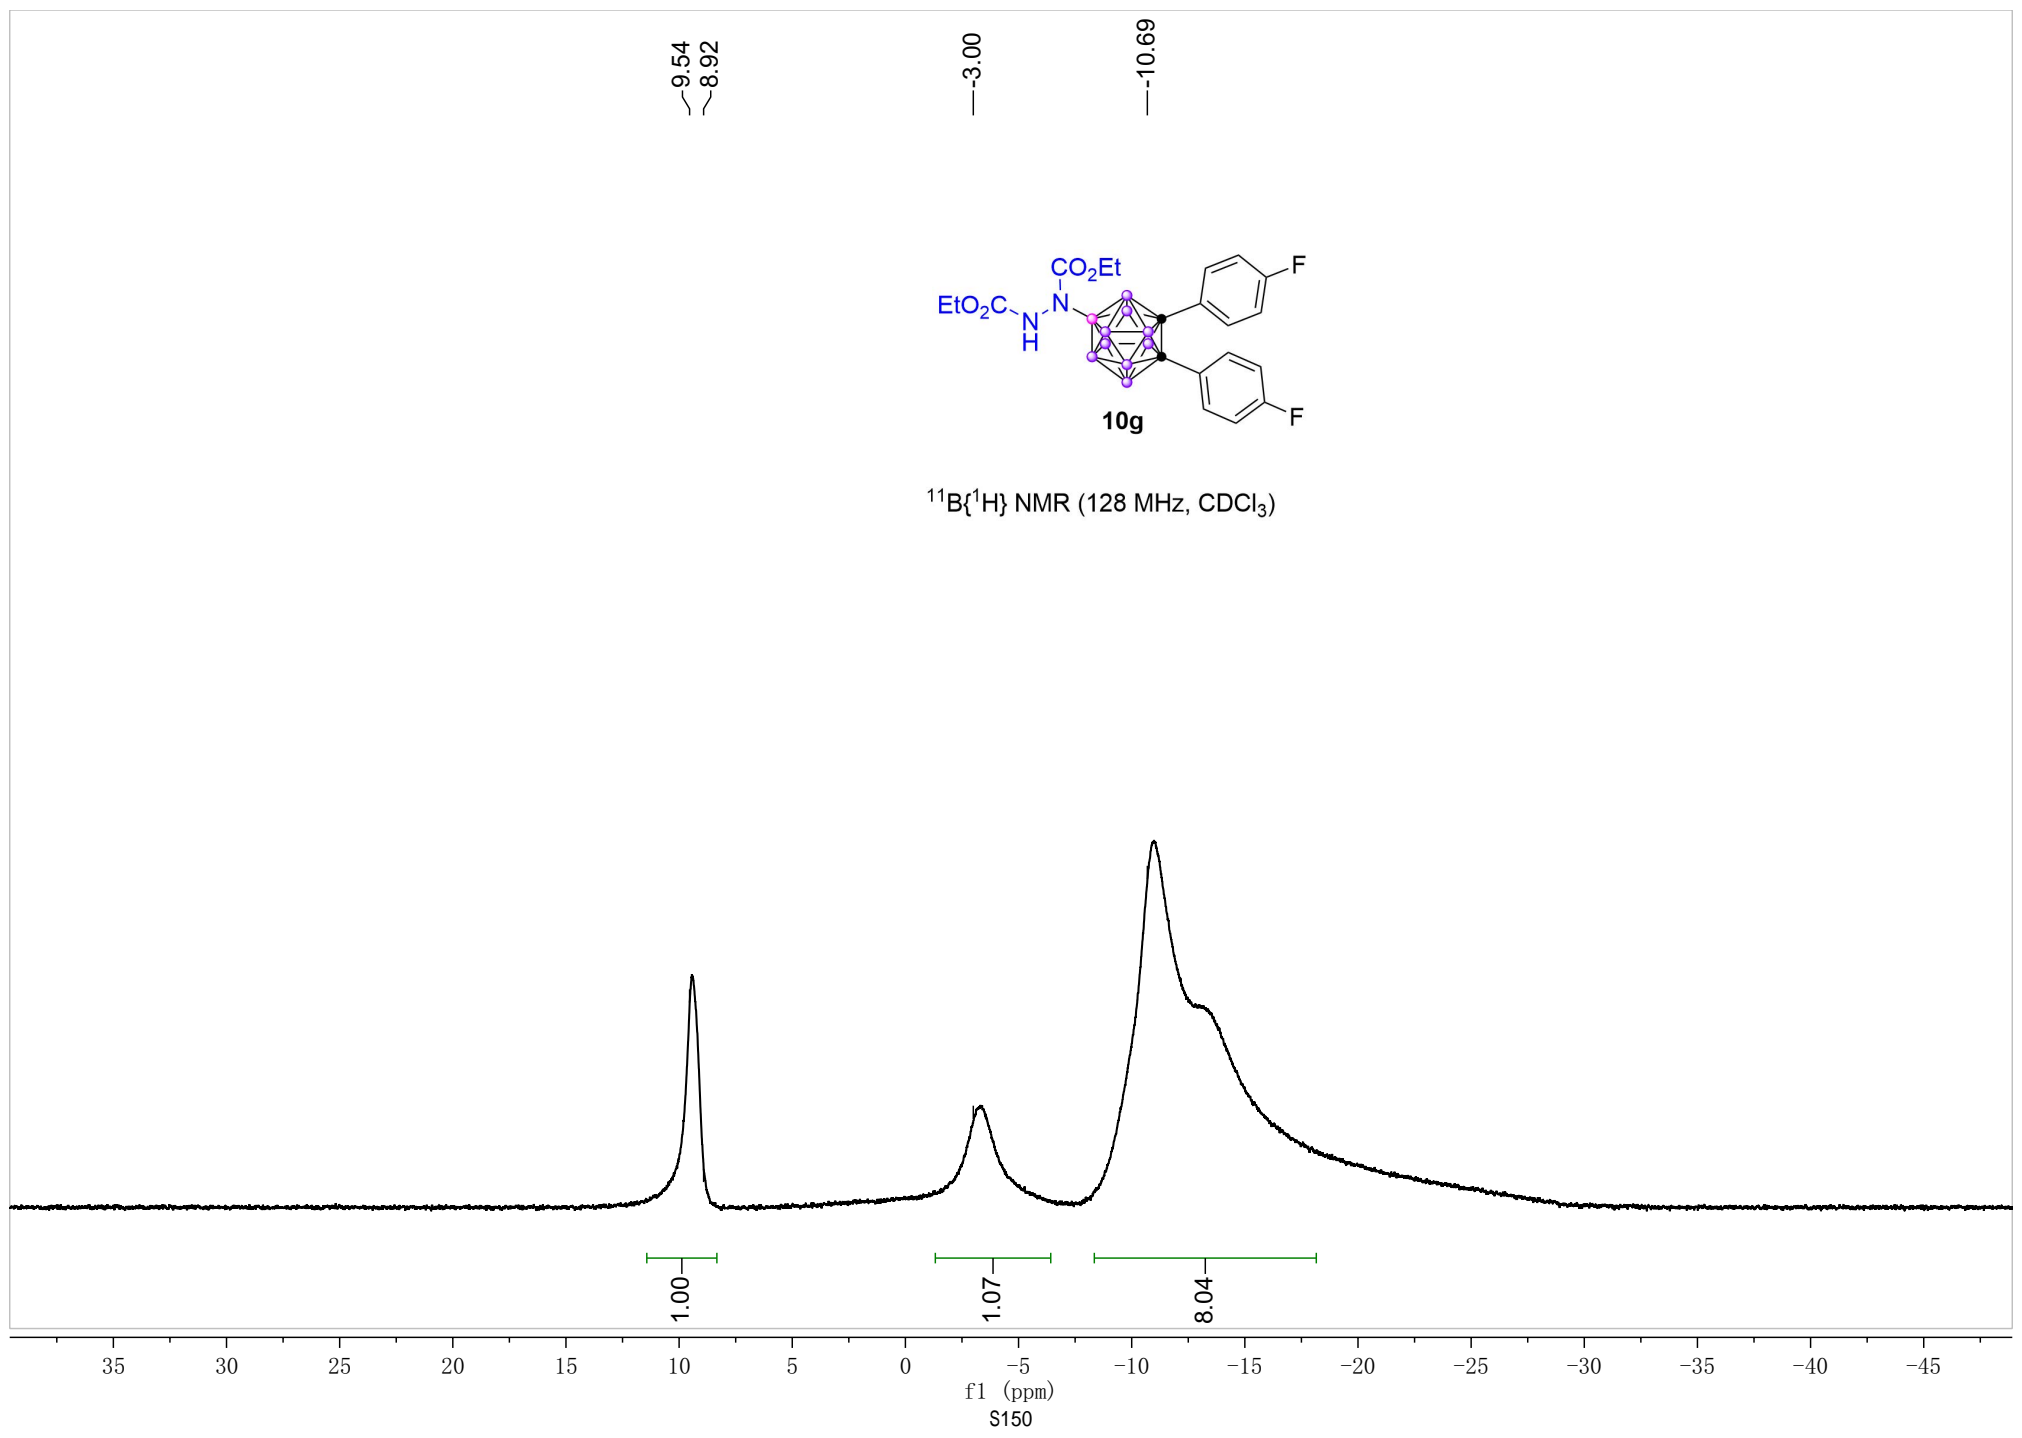



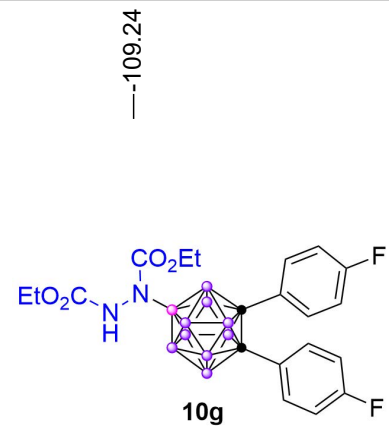

<sup>19</sup>F NMR (377 MHz, CDCl<sub>3</sub>)

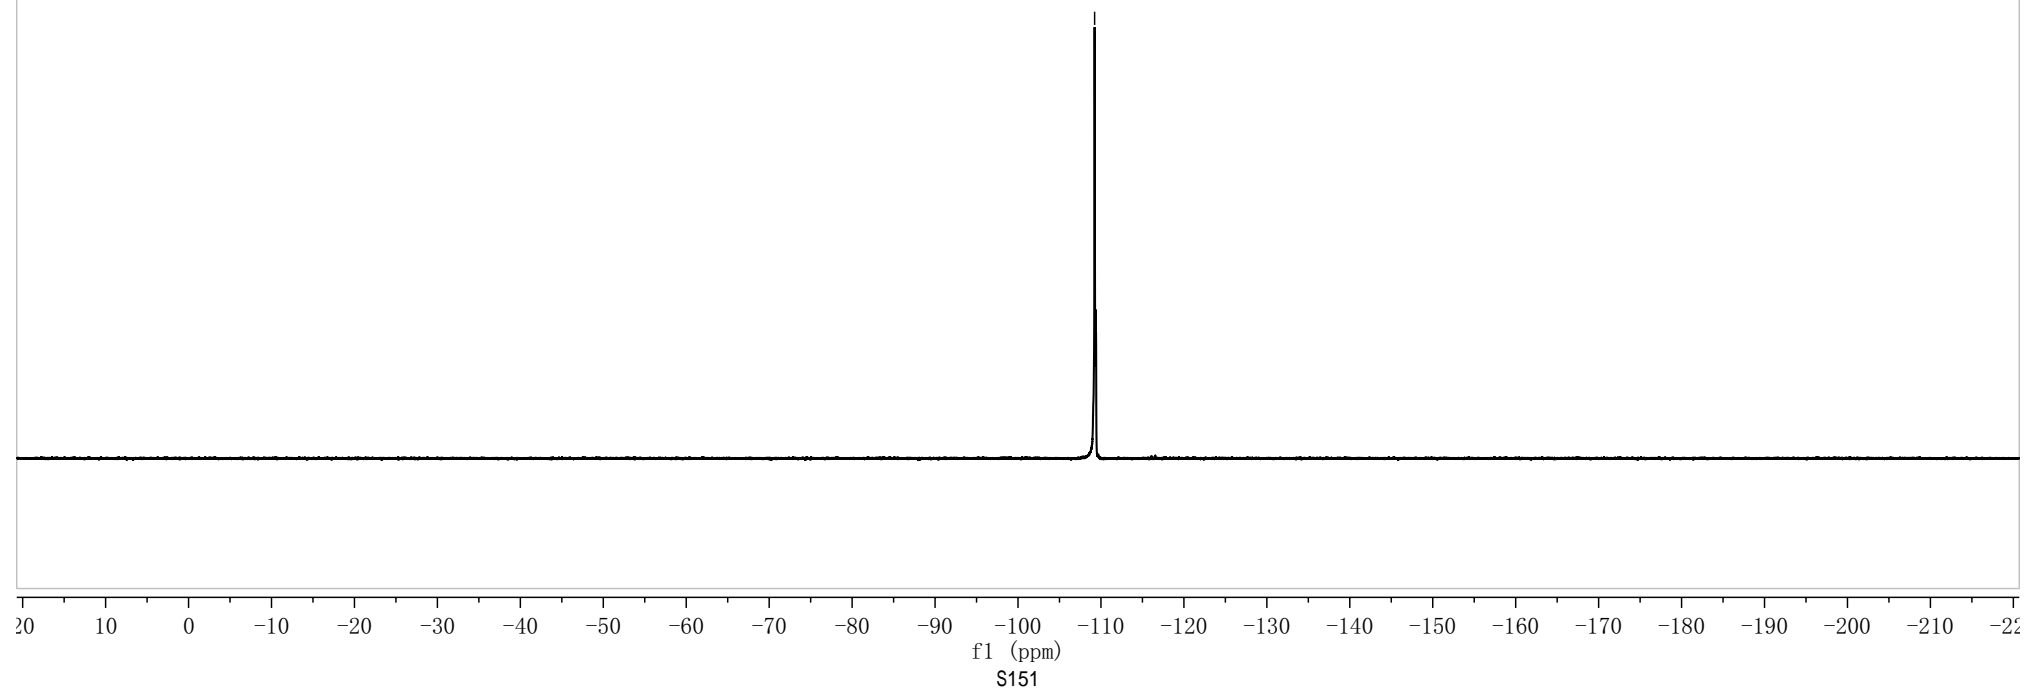

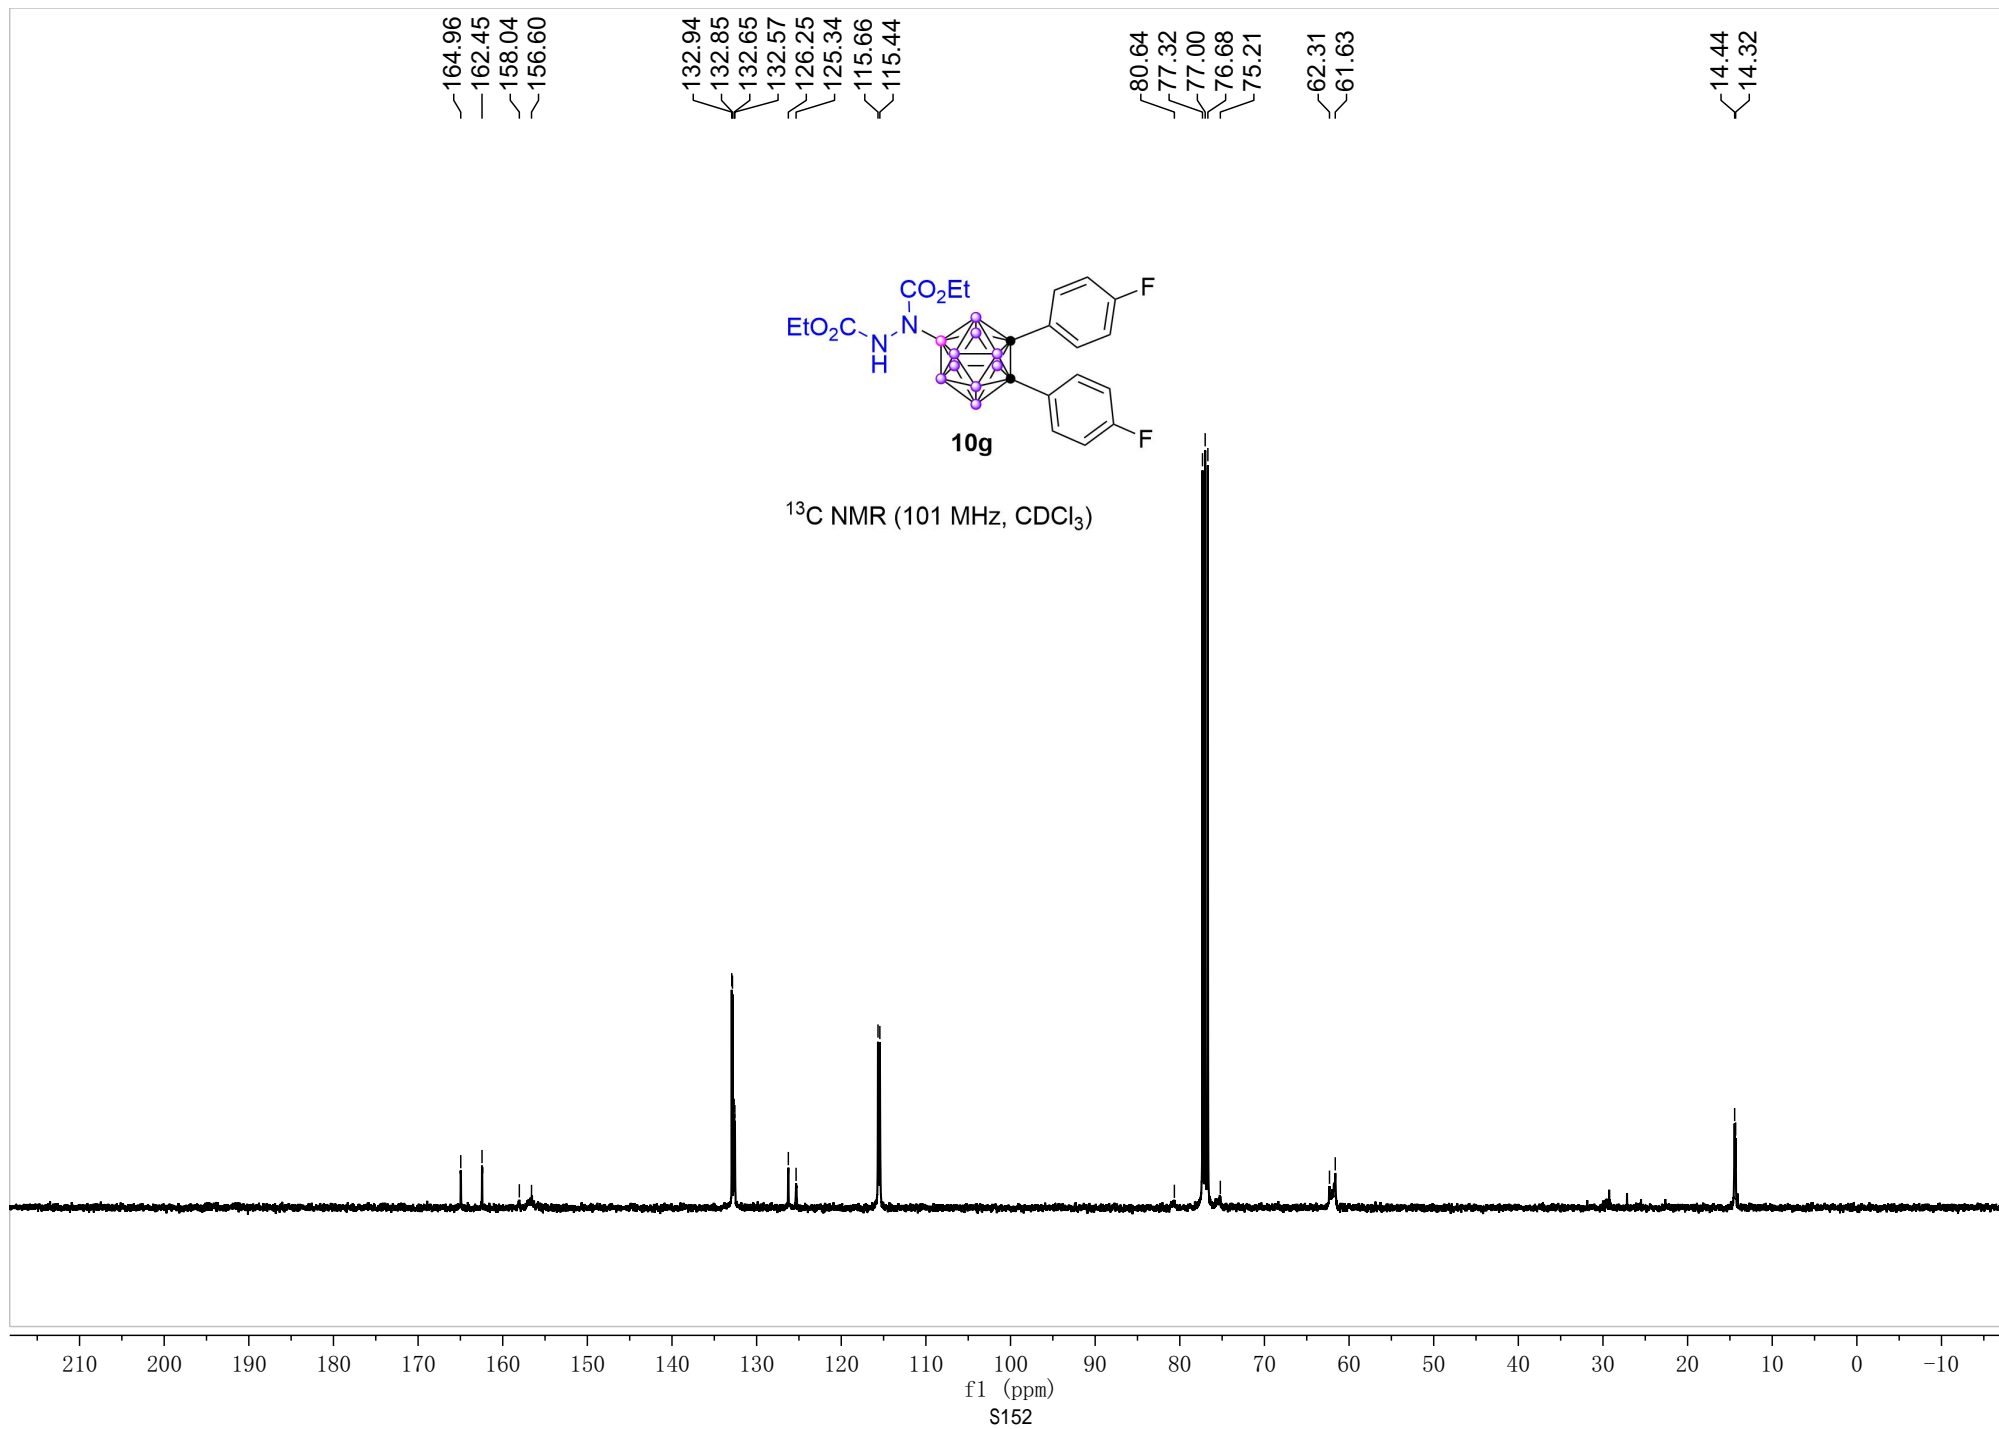

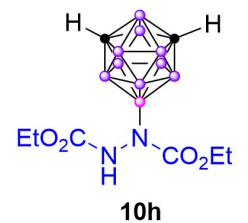

<sup>1</sup>H NMR (400 MHz, CDCl<sub>3</sub>)

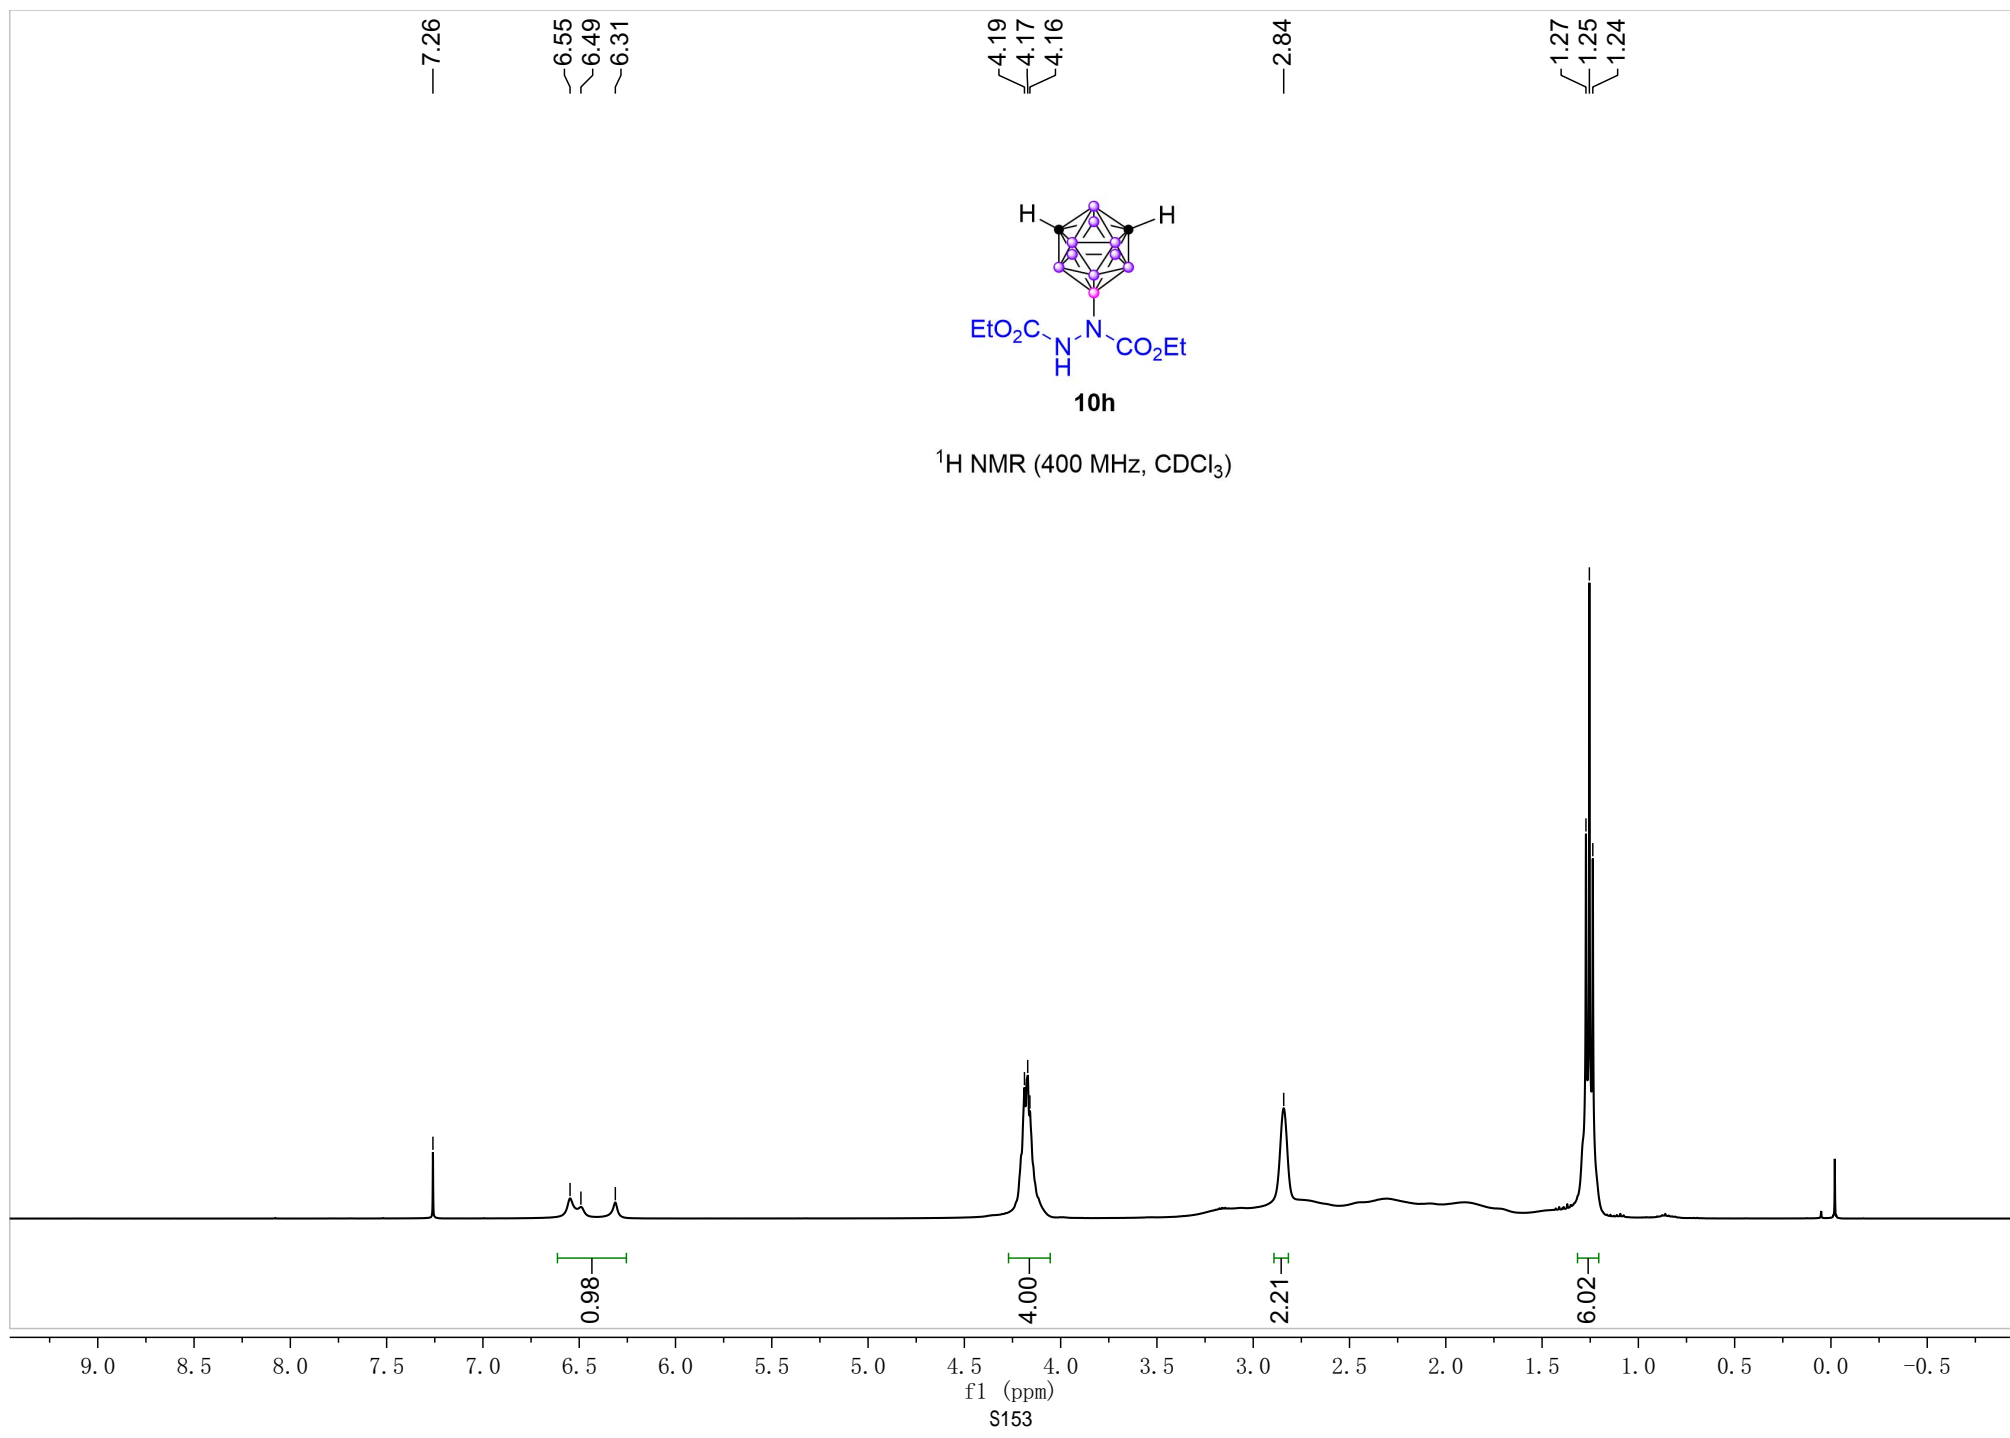

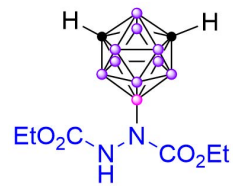

10h

$^1\text{H}\{^{11}\text{B}\}$  NMR (400 MHz,  $\text{CDCl}_3$ )

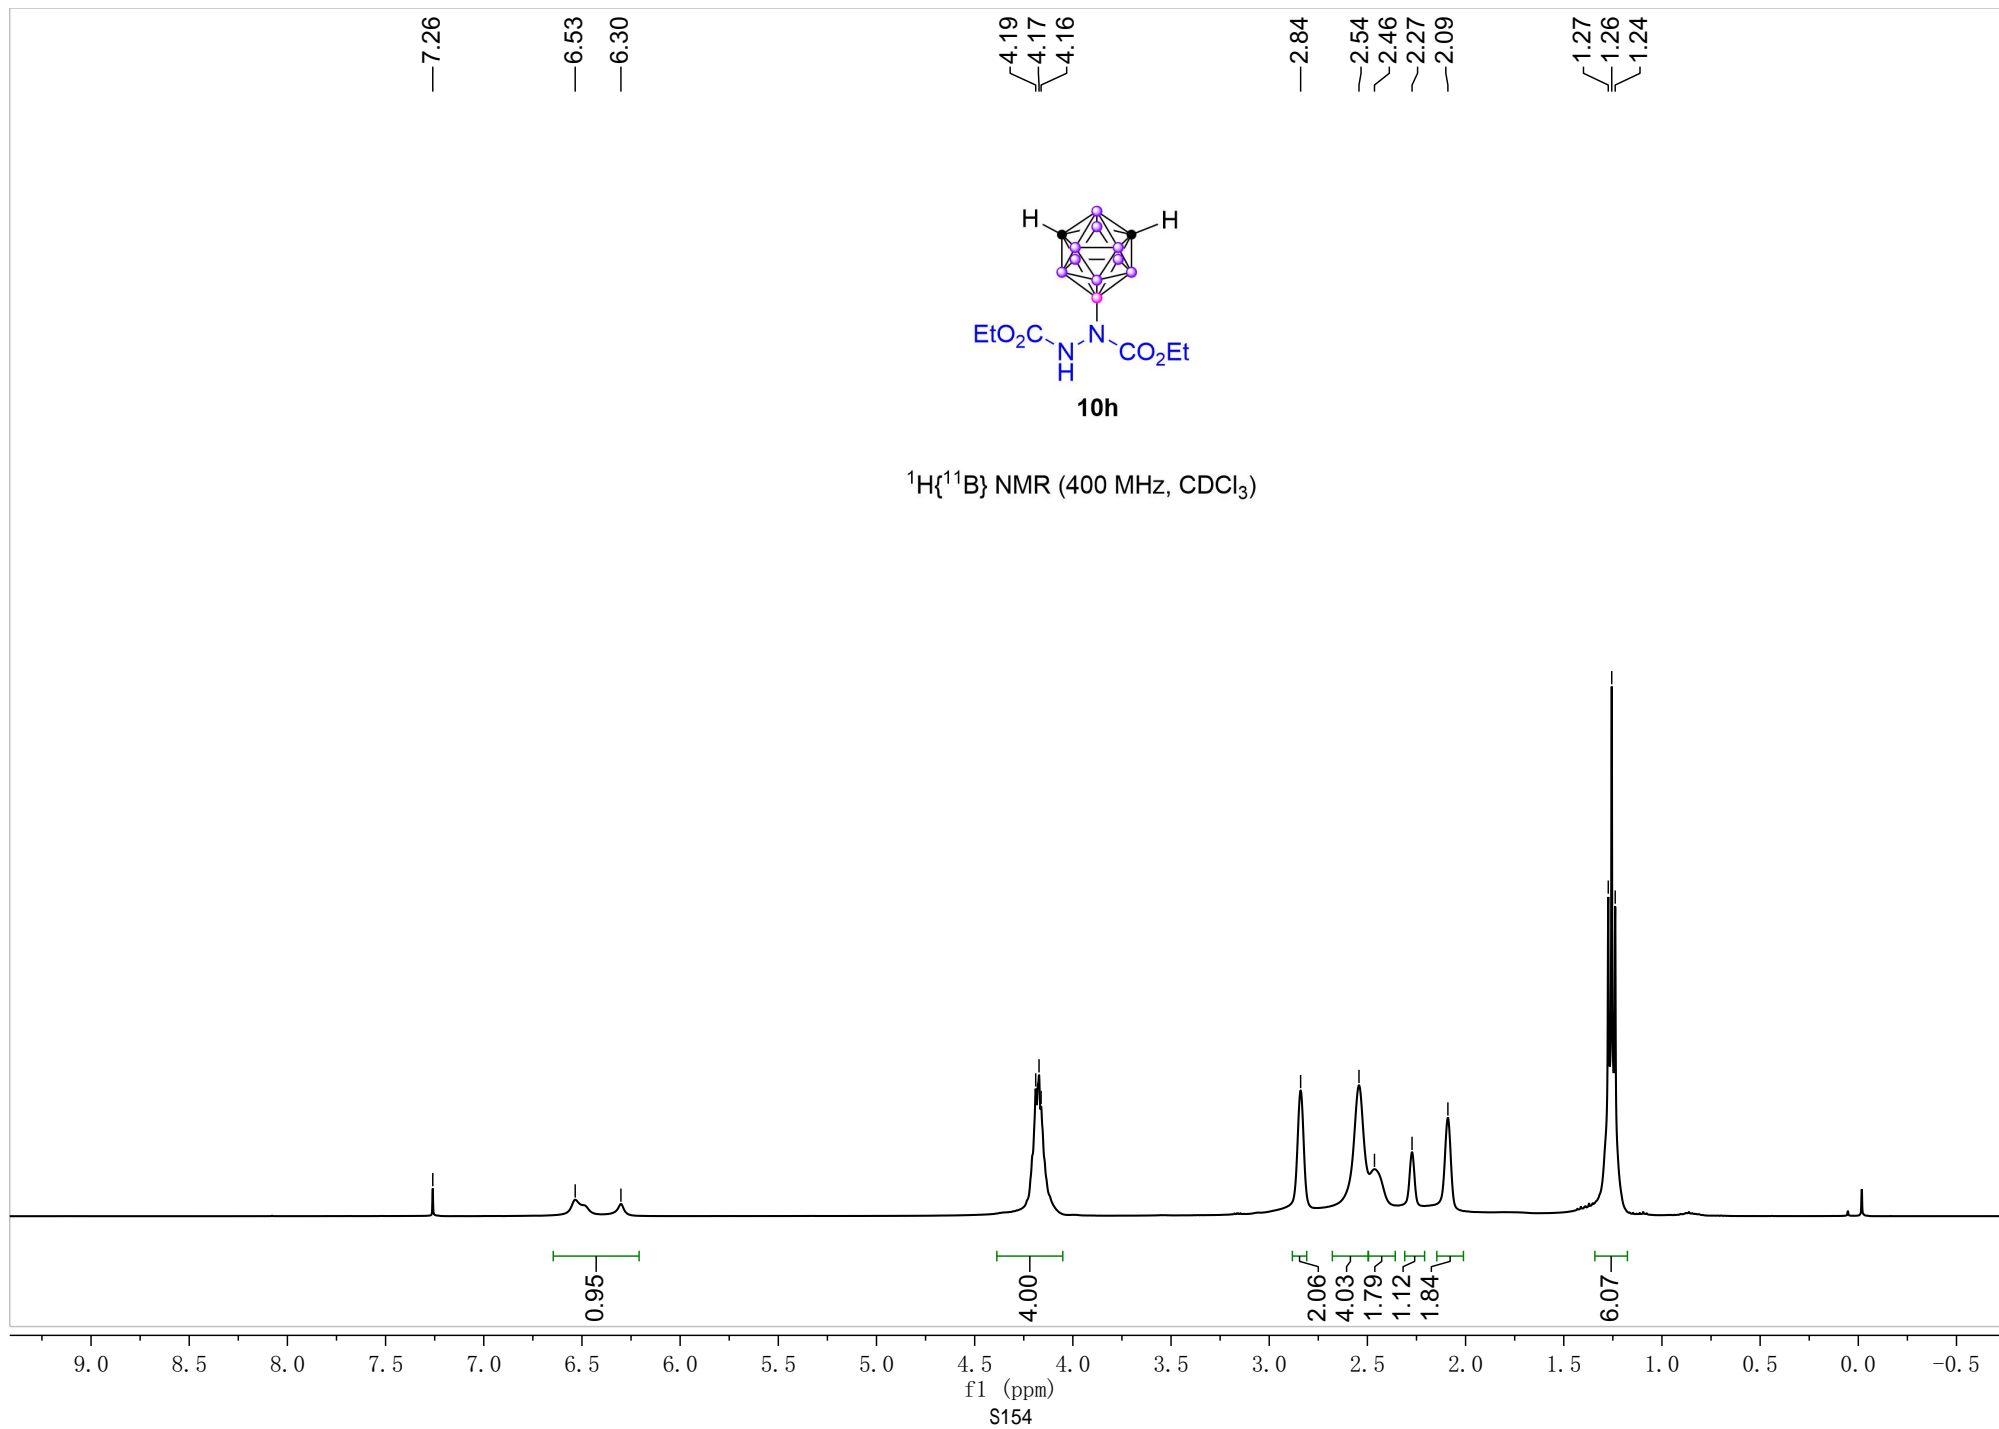

-2.20

-6.80  
-8.05  
-10.38  
-11.57  
-13.39  
-14.83  
-16.18  
-18.31  
-19.73  
-21.21  
-22.59

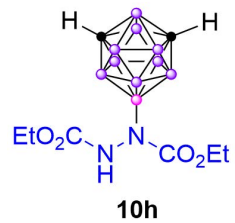

<sup>11</sup>B NMR (128 MHz, CDCl<sub>3</sub>)

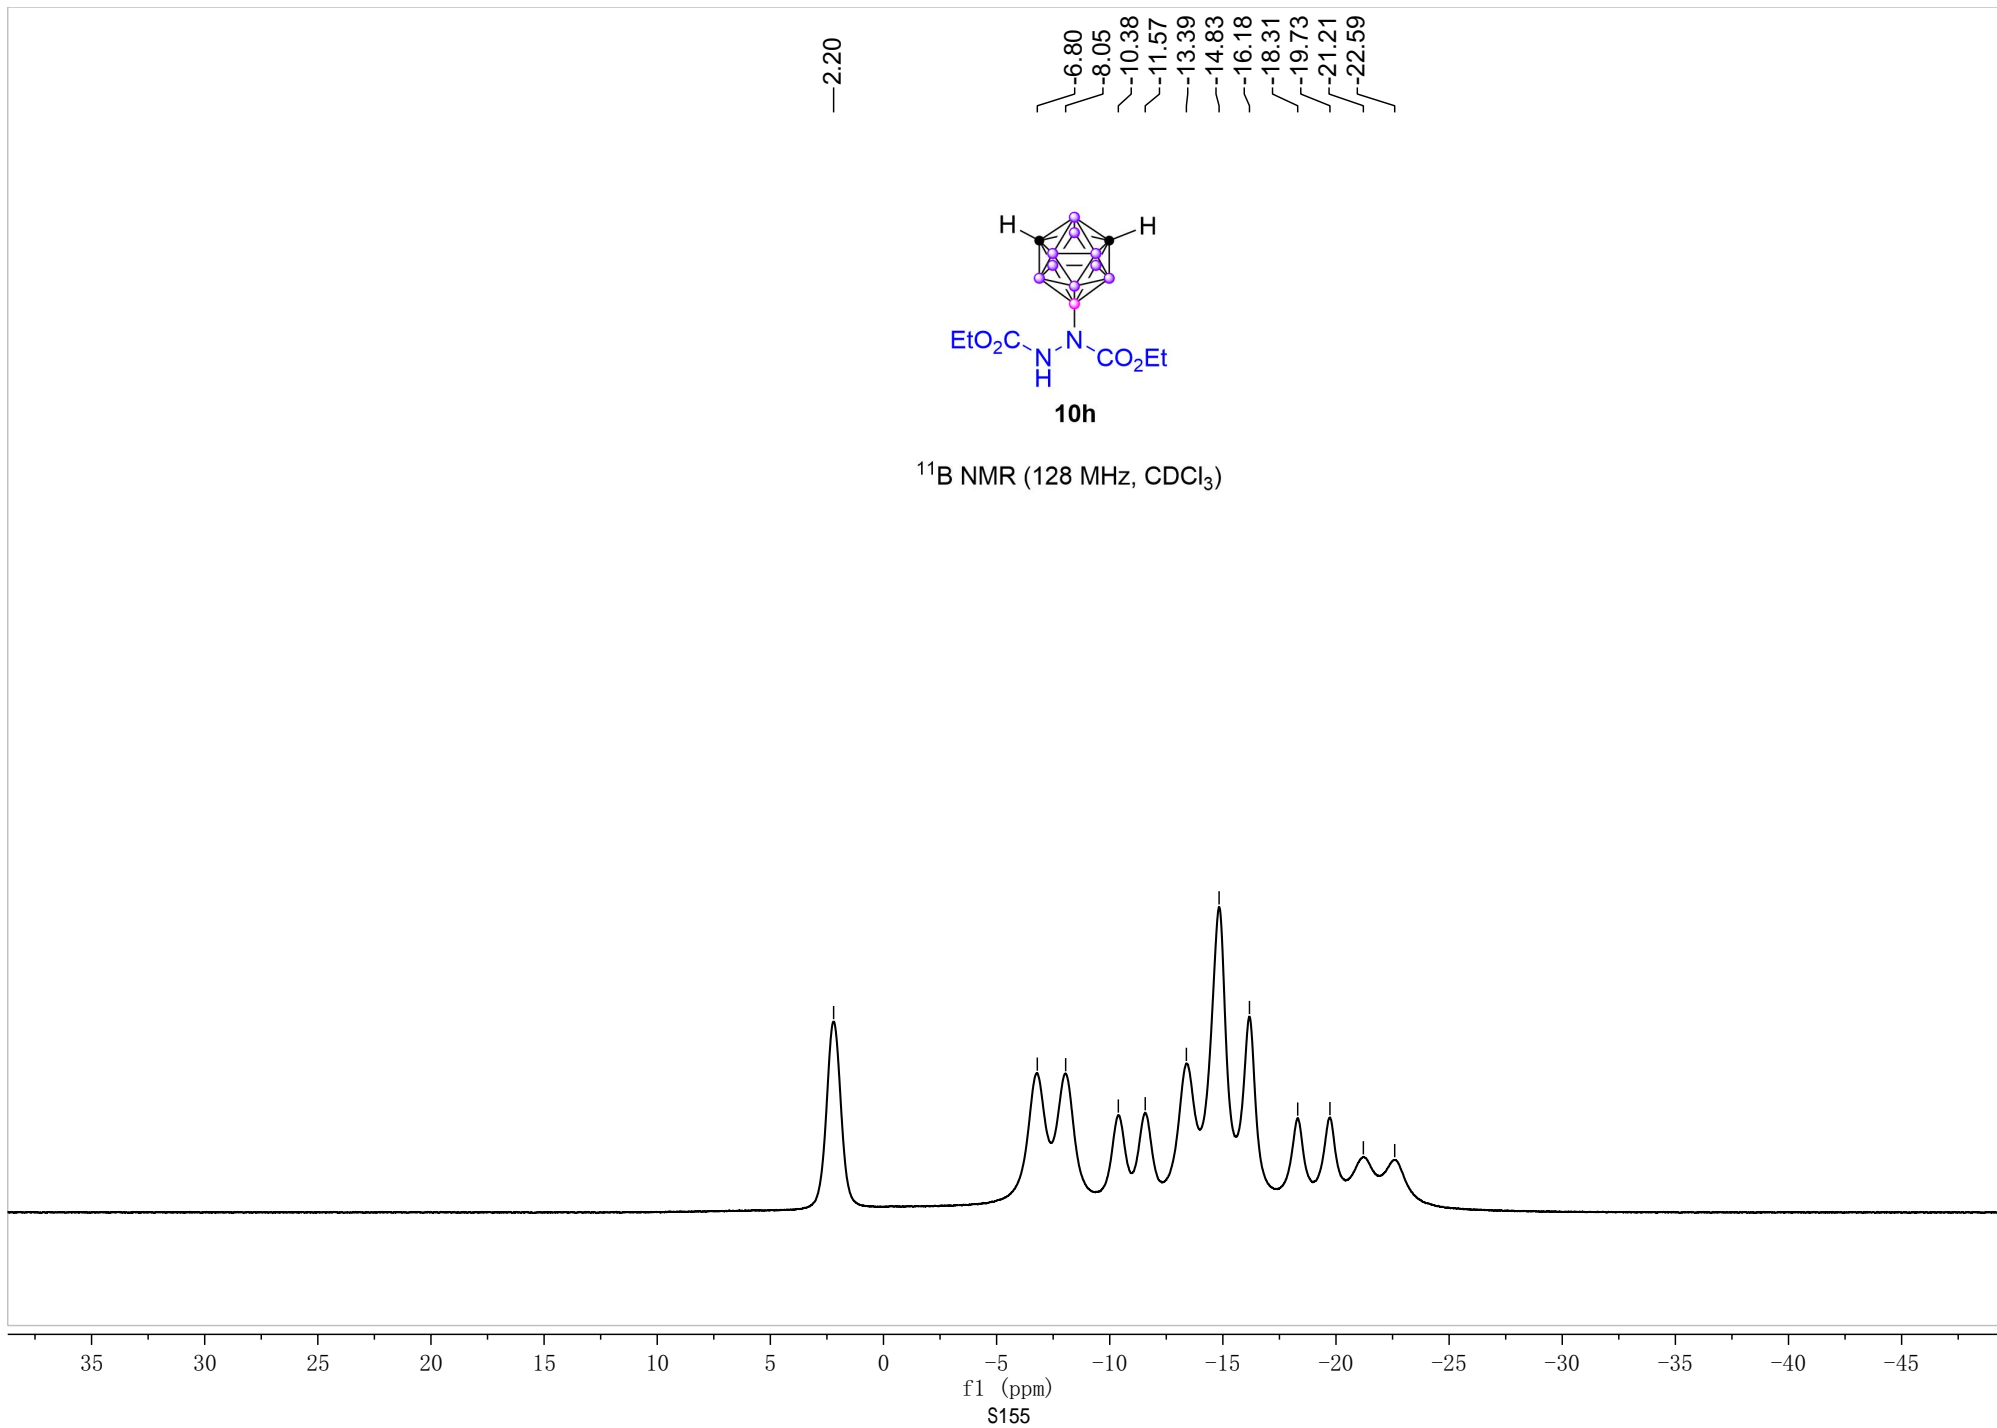

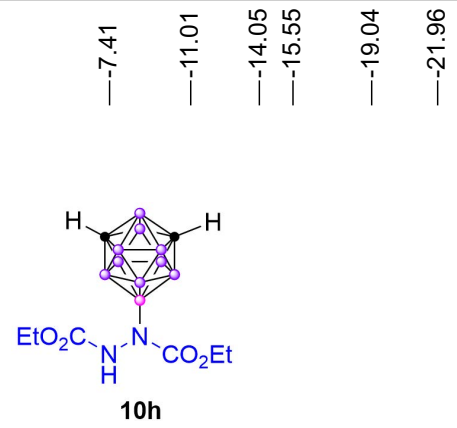

$^{11}\text{B}\{^1\text{H}\}$  NMR (128 MHz,  $\text{CDCl}_3$ )

—2.22  
—7.41  
—11.01  
—14.05  
—15.55  
—19.04  
—21.96

1.10  
2.00  
1.00  
1.88  
2.10  
1.04  
1.01

f1 (ppm)  
S156

35 30 25 20 15 10 5 0 -5 -10 -15 -20 -25 -30 -35 -40 -45

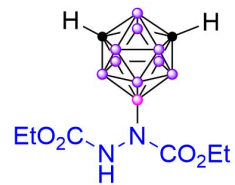

10h

<sup>13</sup>C NMR (101 MHz, CDCl<sub>3</sub>)

158.14  
156.50

77.32  
77.00  
76.68

62.38  
61.65

51.43

14.42  
14.28

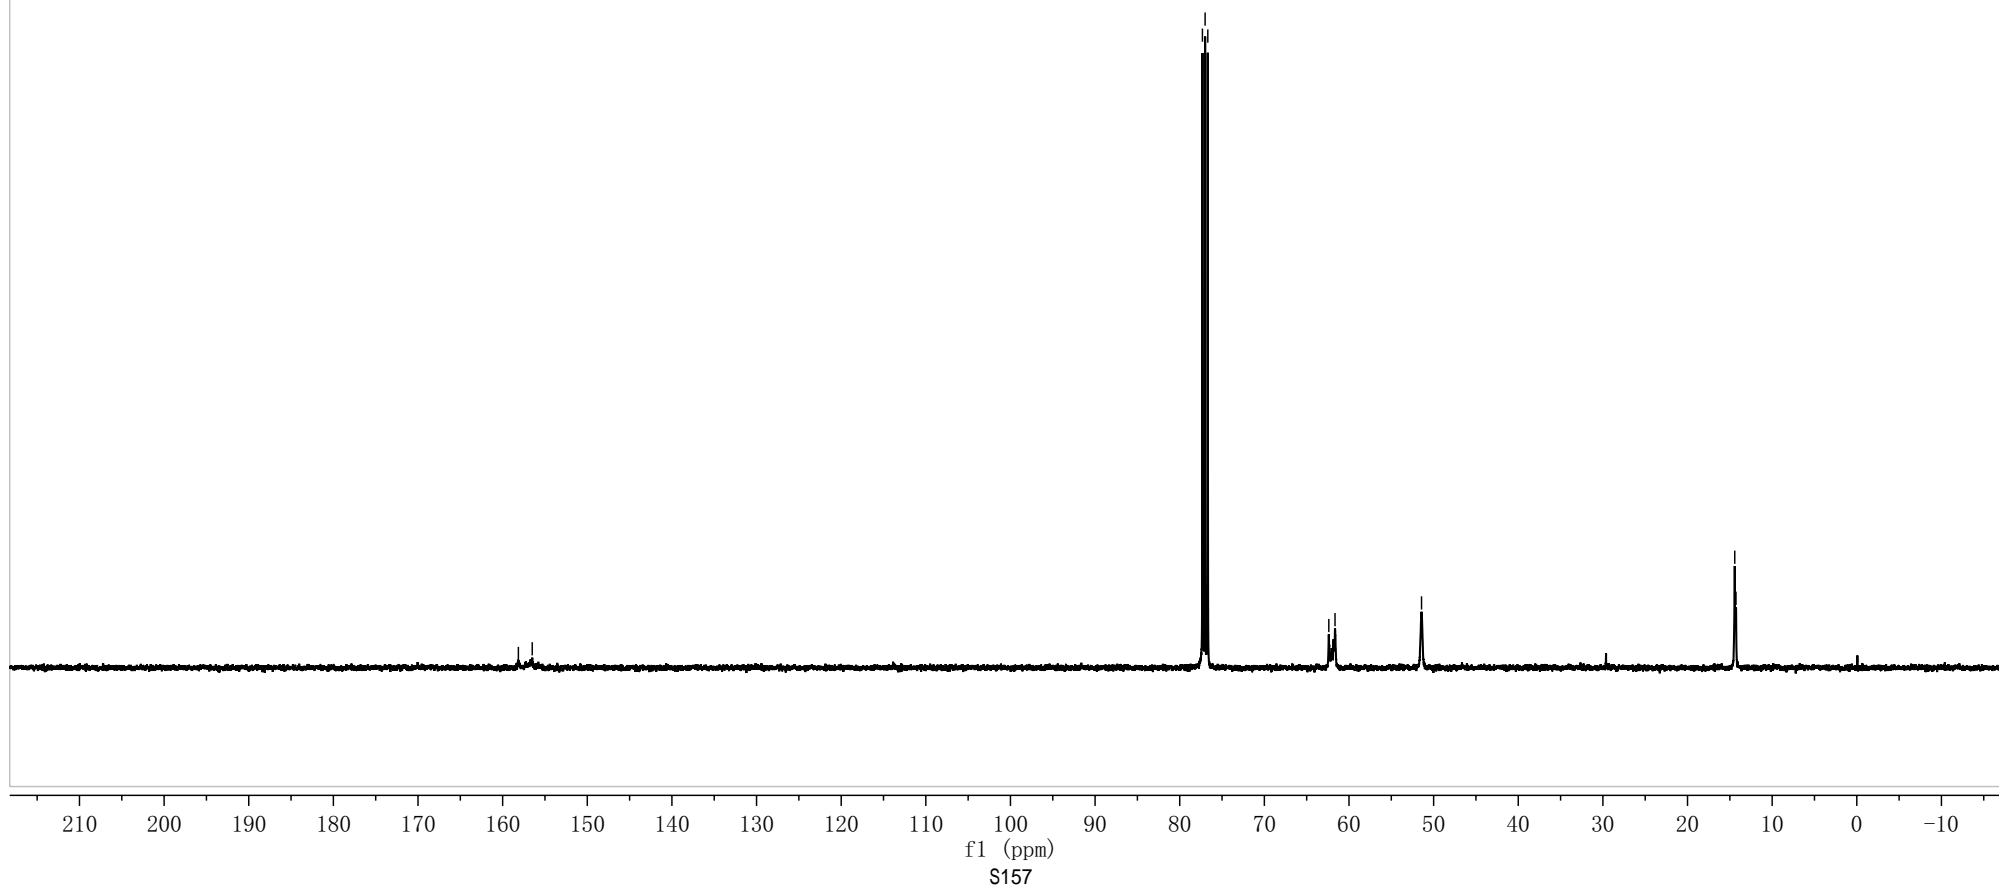

7.61  
7.51  
7.26  
7.09  
6.84  
6.74

4.17

2.73

1.25  
1.24  
1.23

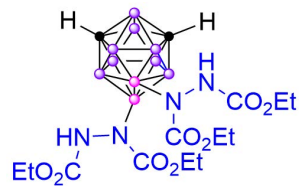

**10h'**

<sup>1</sup>H NMR (400 MHz, CDCl<sub>3</sub>)

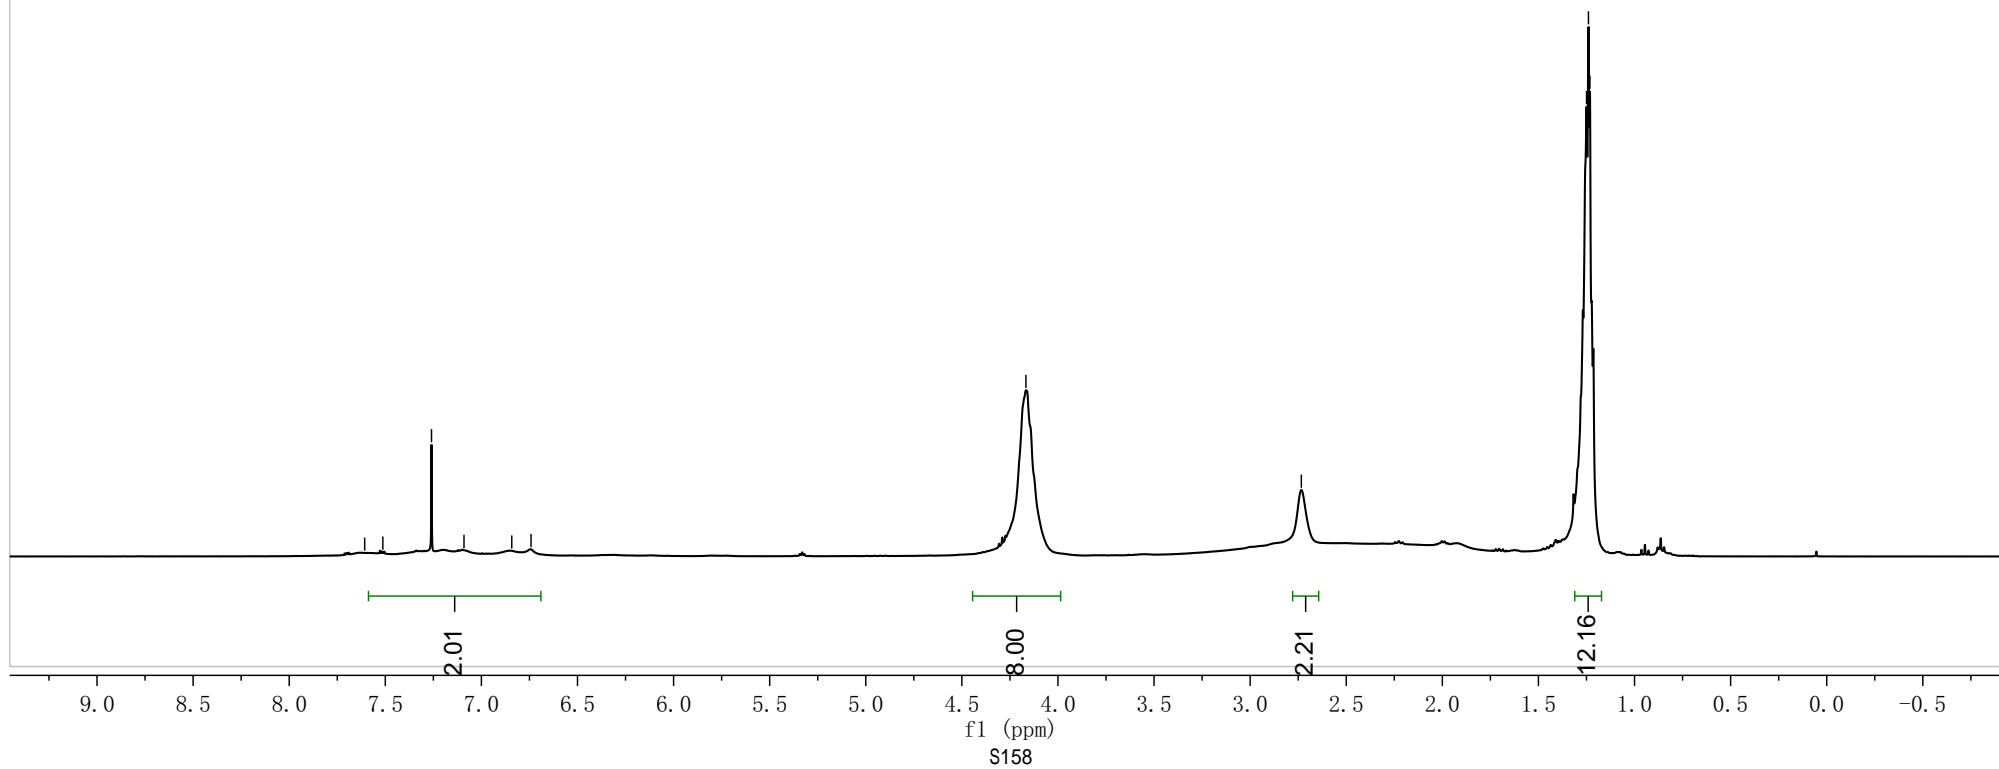



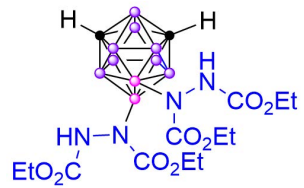

10h'

$^1\text{H}\{^{11}\text{B}\}$  NMR (400 MHz,  $\text{CDCl}_3$ )

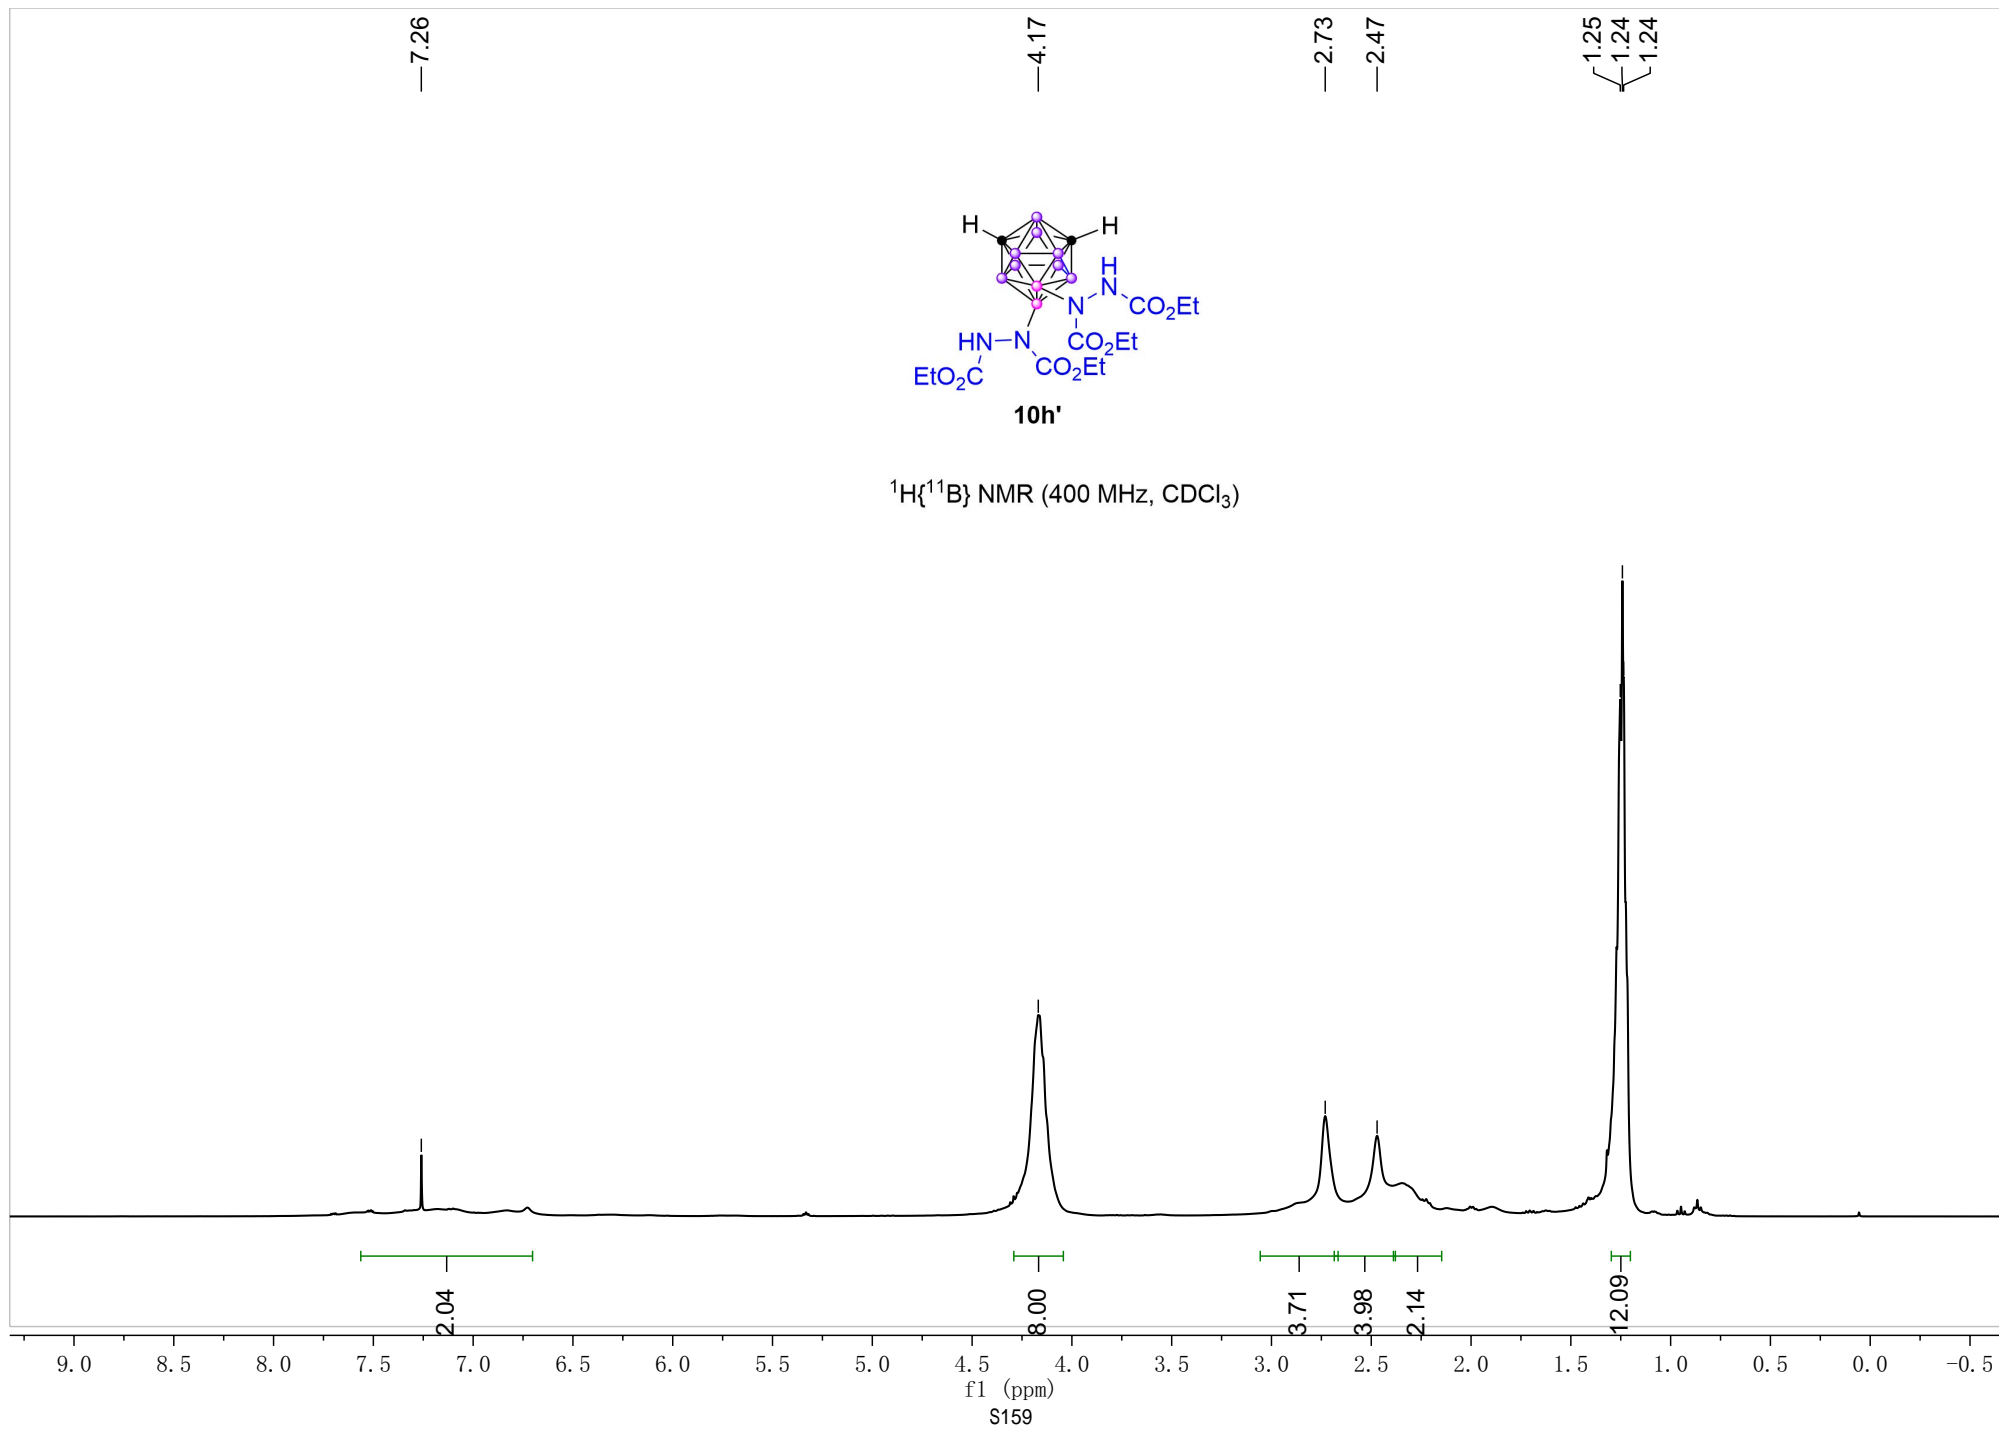

0.77  
0.45  
-9.75  
-15.92  
-23.14

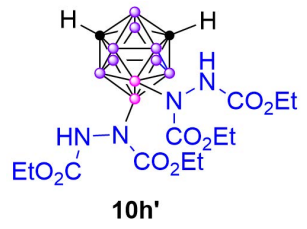

<sup>11</sup>B NMR (128 MHz, CDCl<sub>3</sub>)

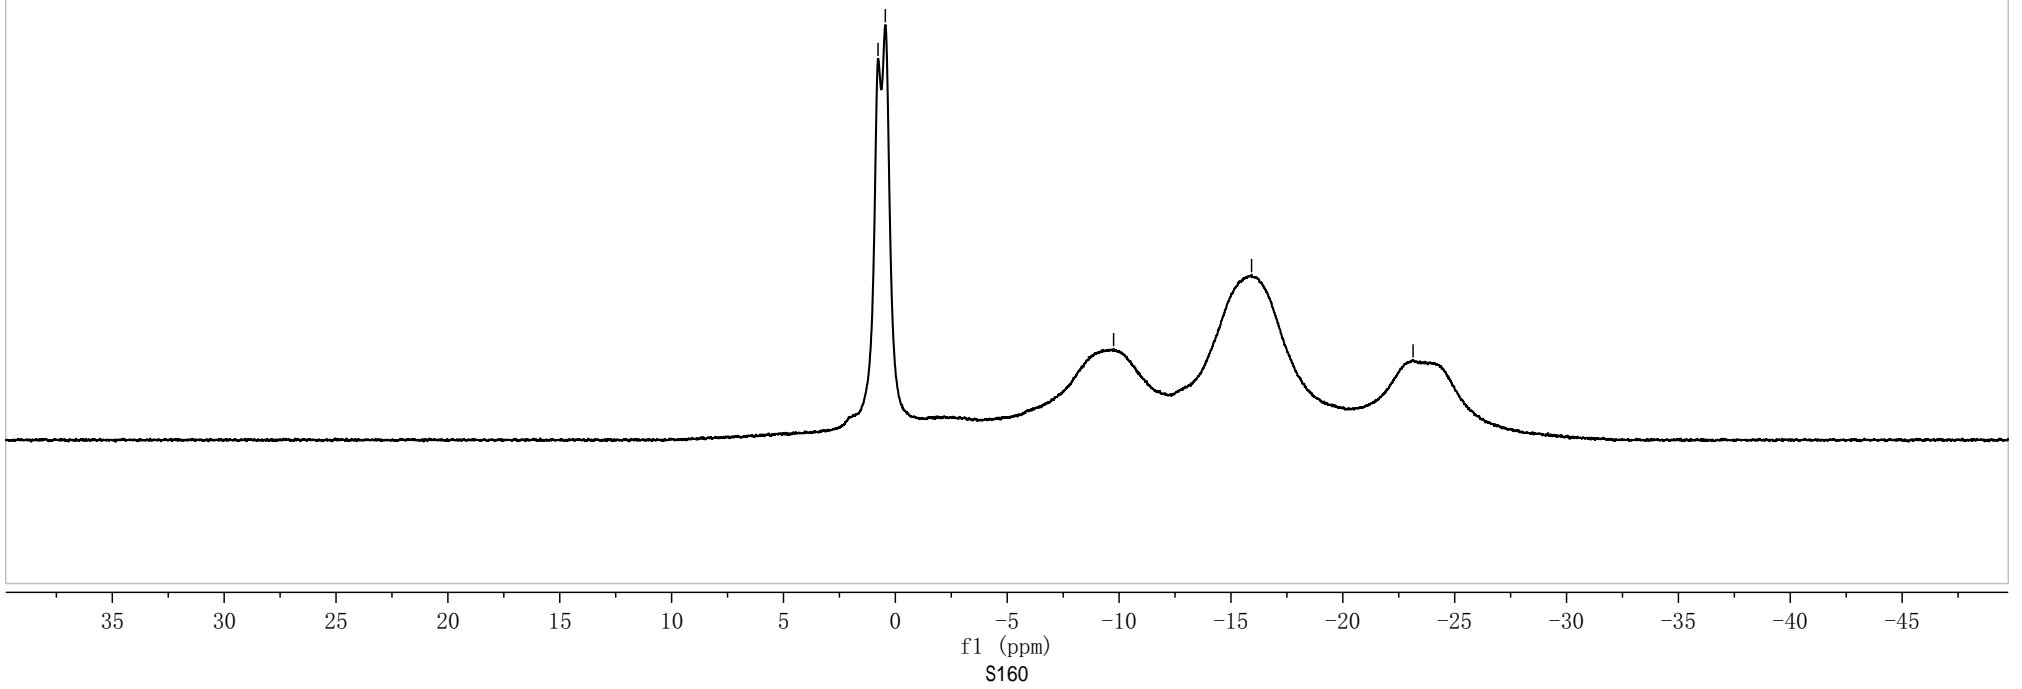

0.77  
0.46  
-9.52  
-16.03  
-24.00

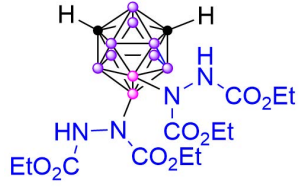

10h'

$^{11}\text{B}\{^1\text{H}\}$  NMR (128 MHz,  $\text{CDCl}_3$ )

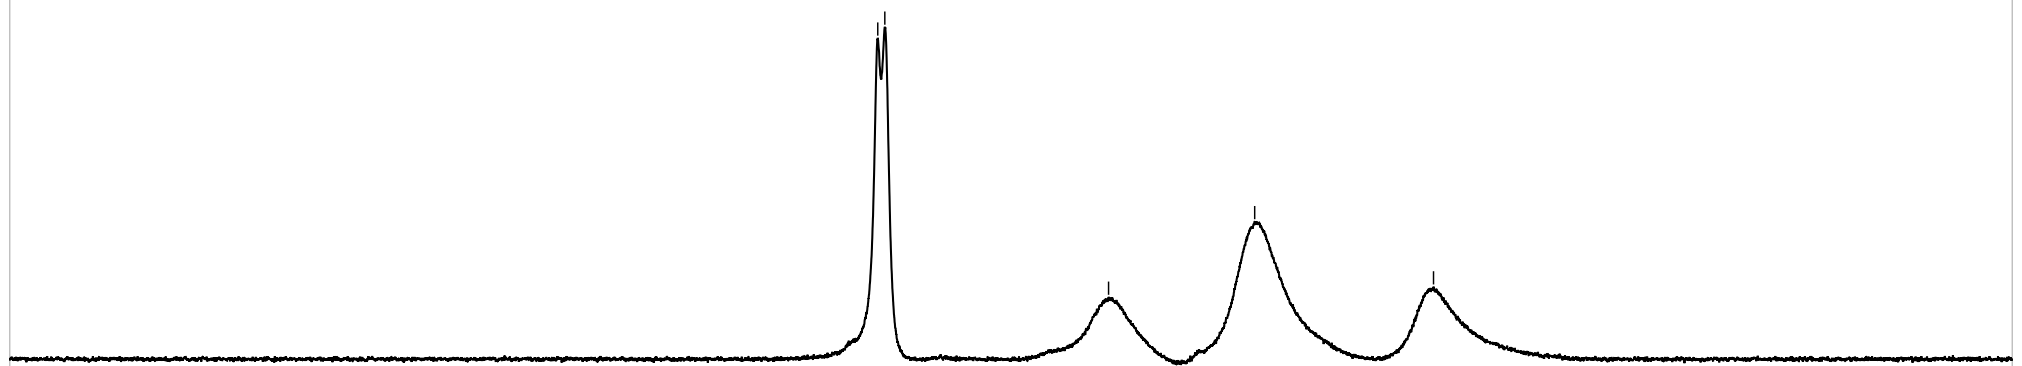

1.06  
1.15  
1.62  
4.00  
2.05

35 30 25 20 15 10 5 0 -5 -10 -15 -20 -25 -30 -35 -40 -45  
f1 (ppm)  
S161

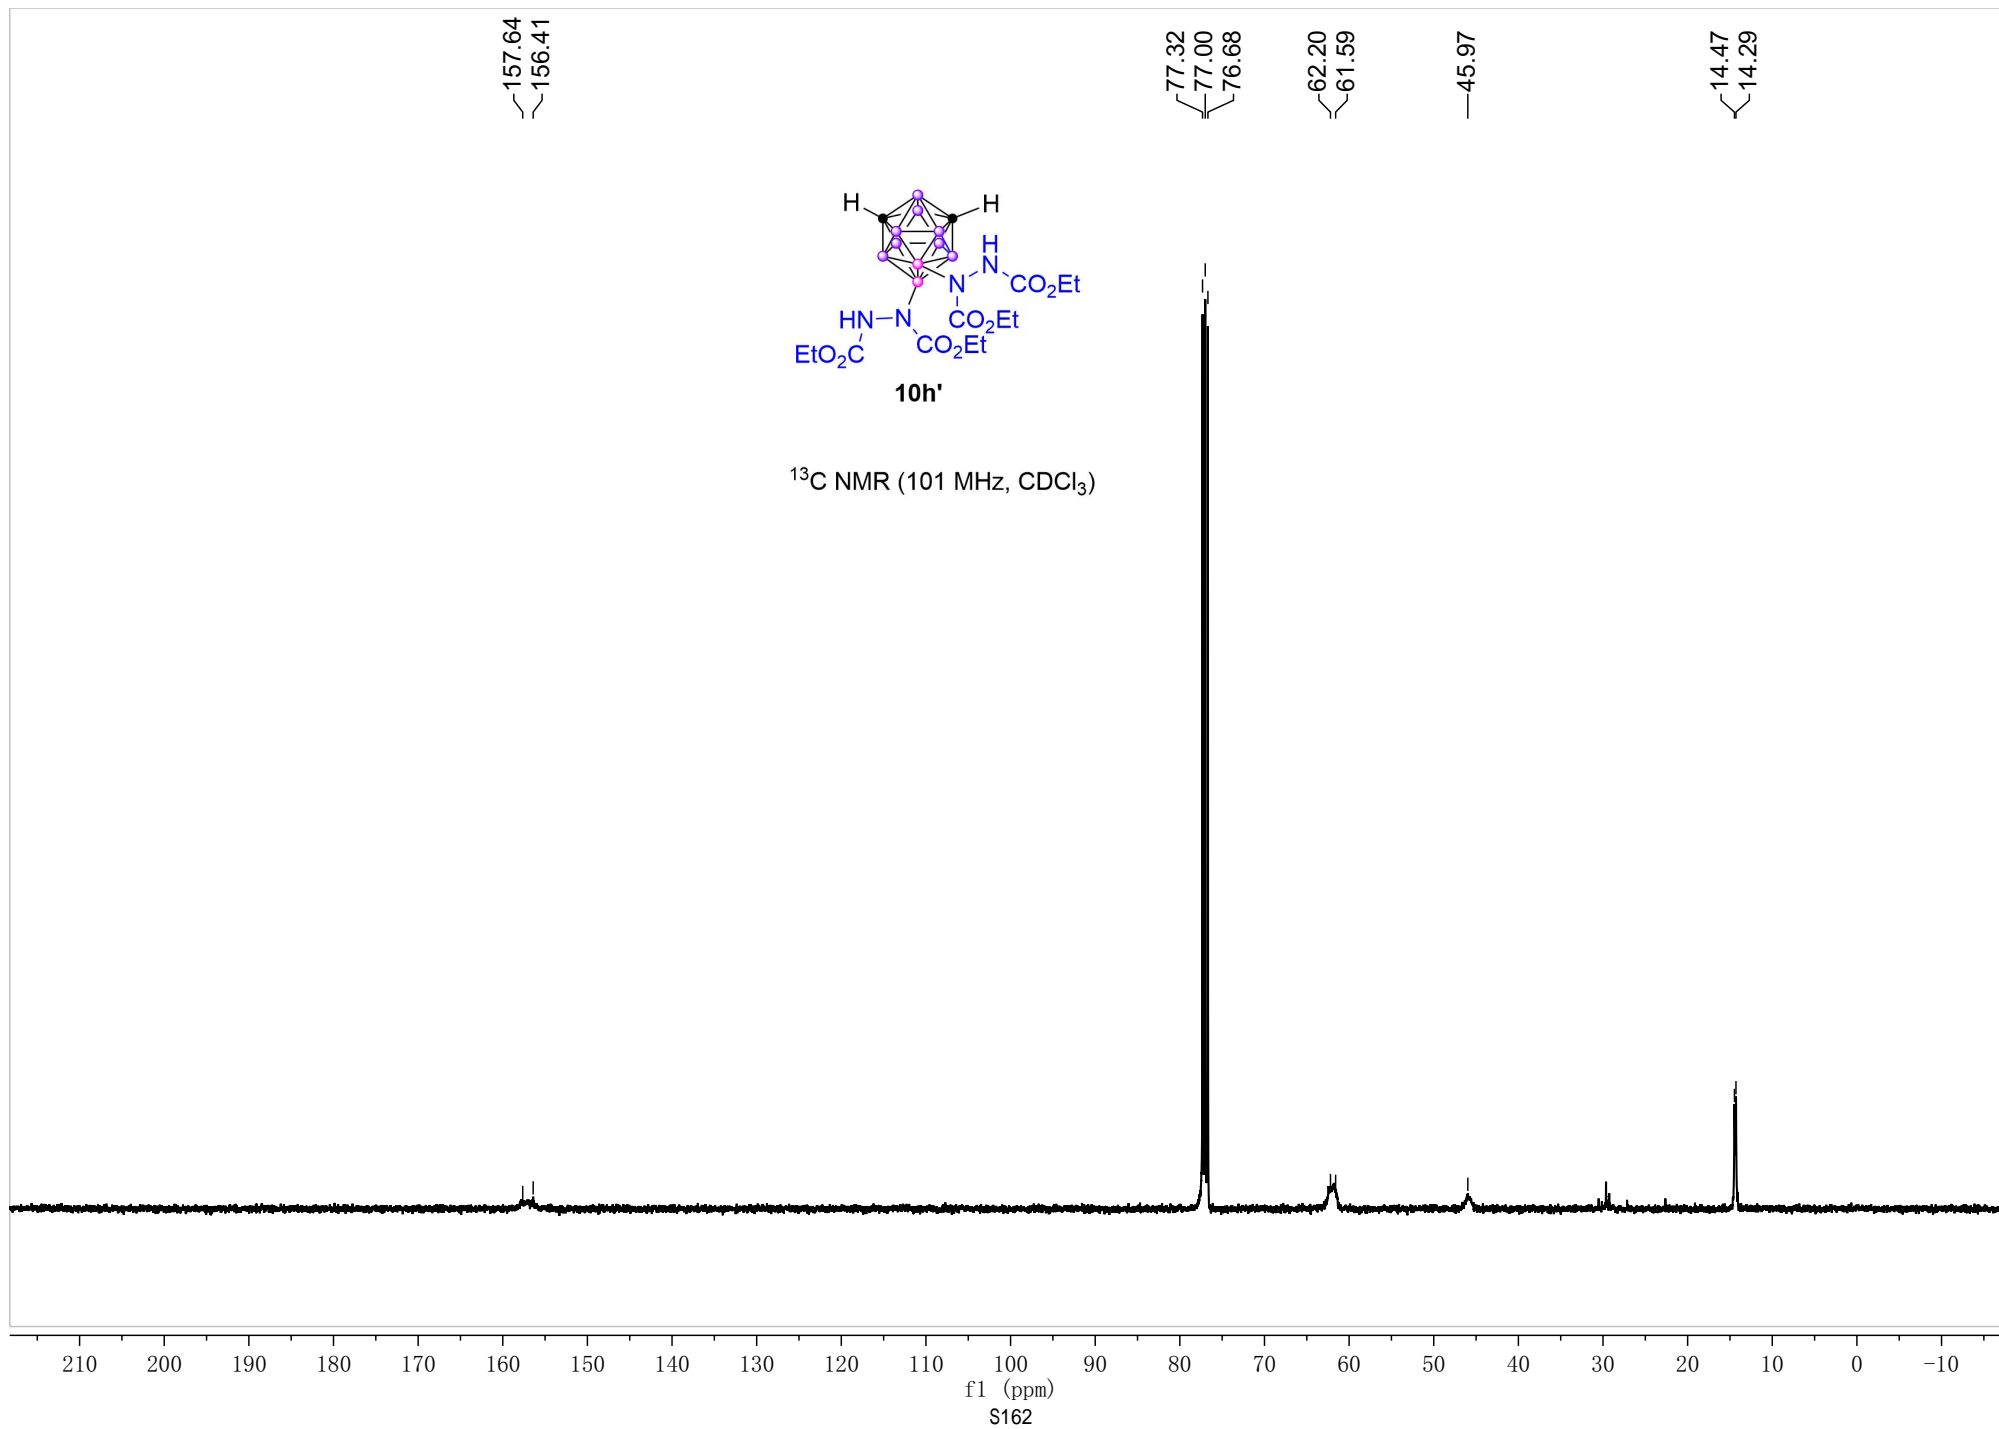

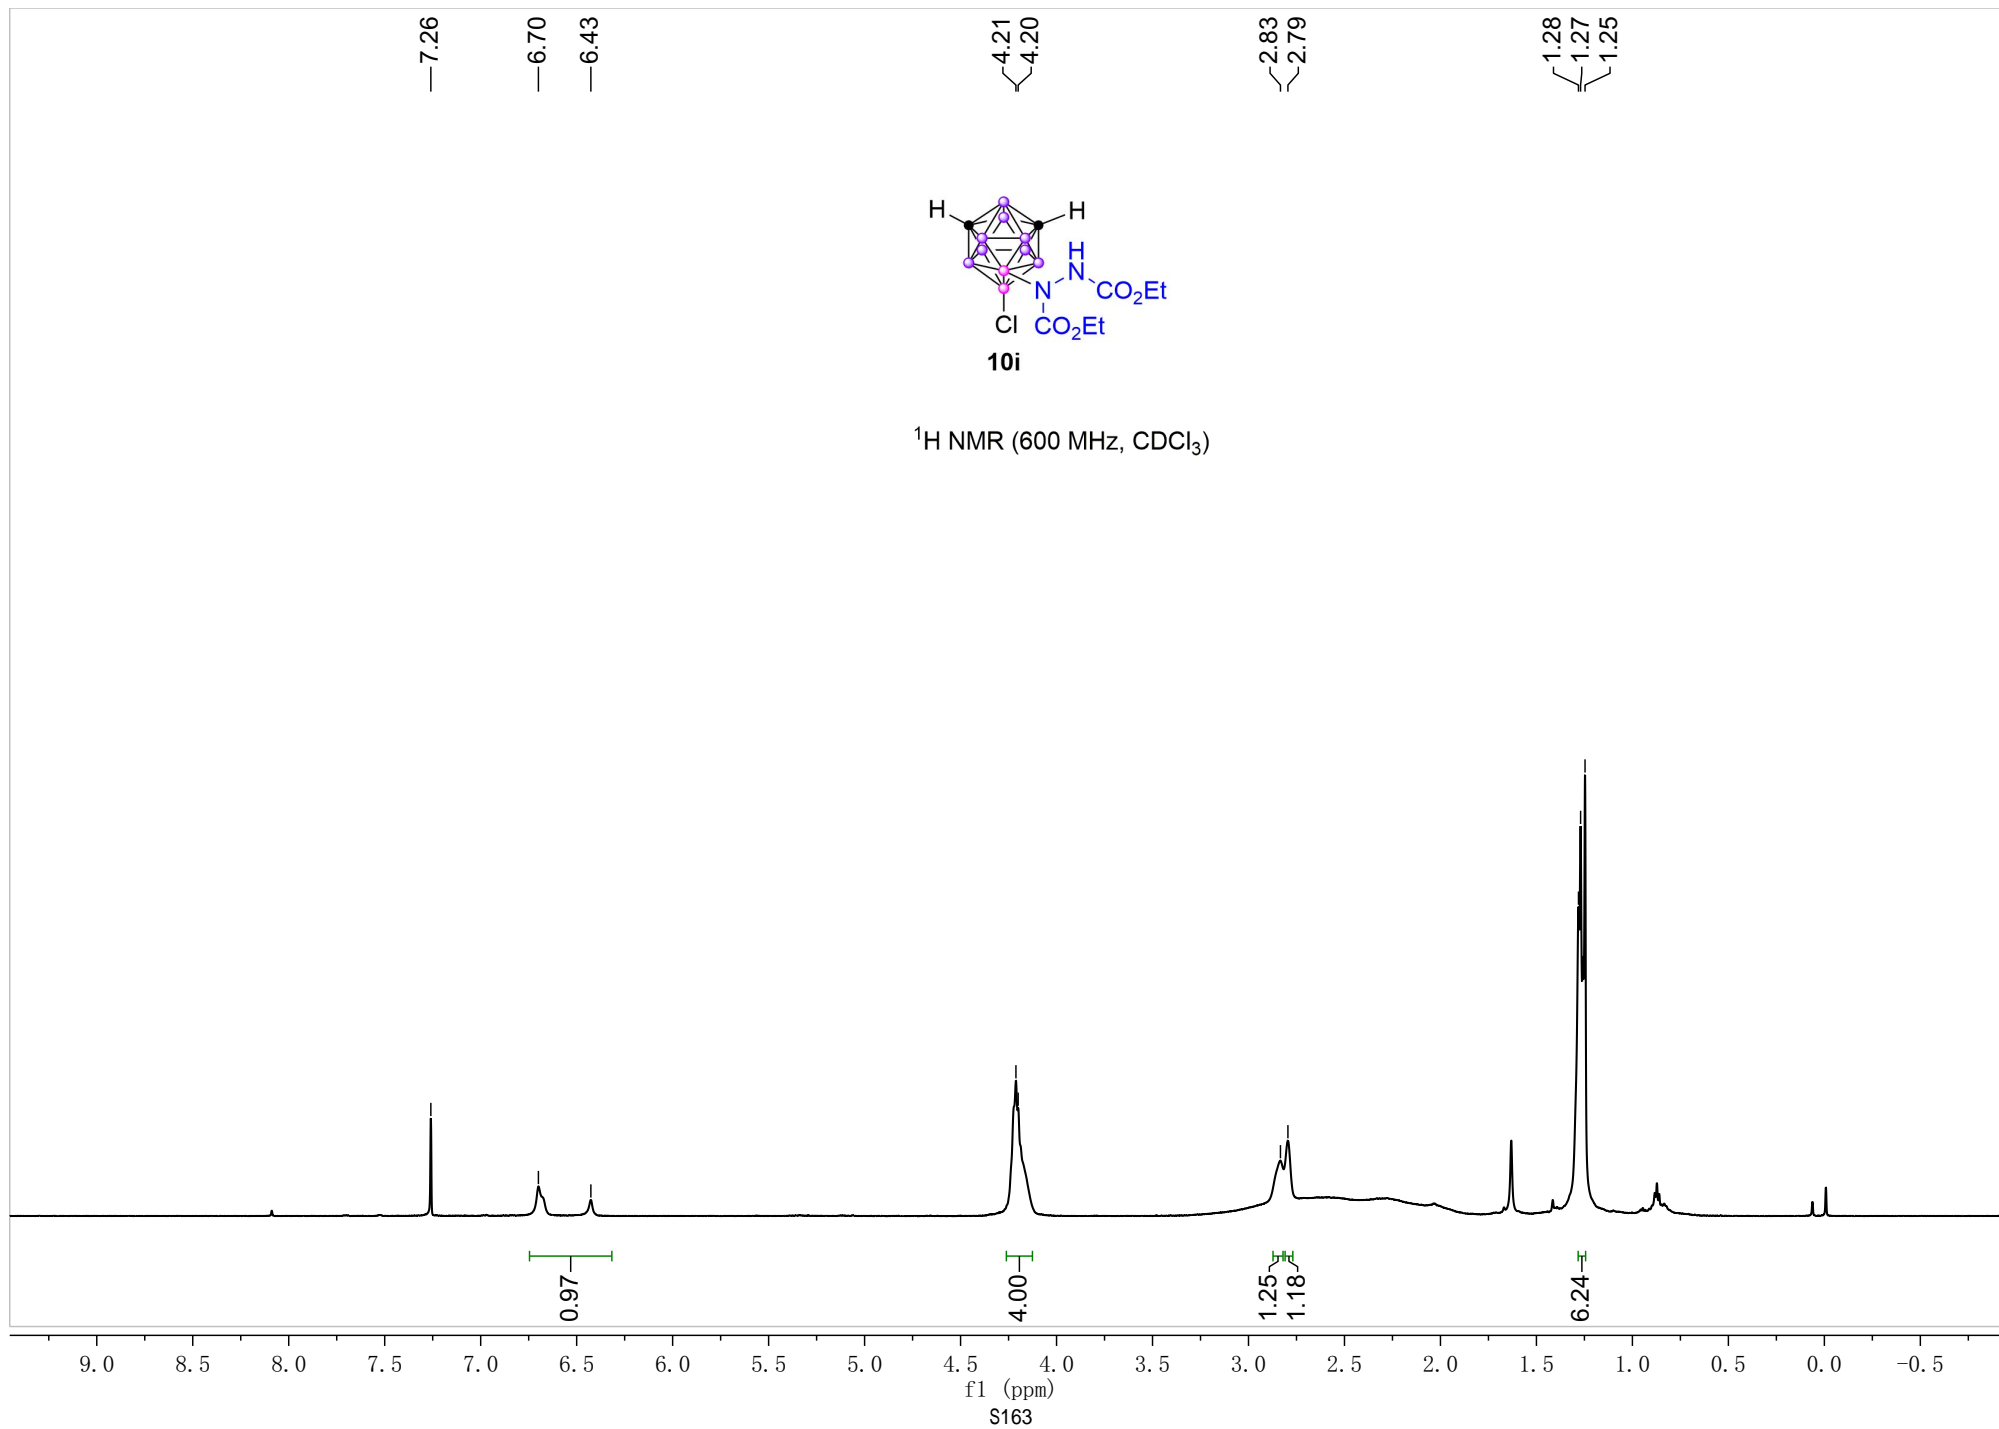

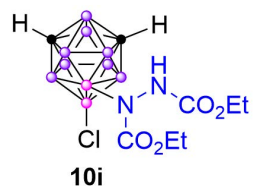

$^1\text{H}\{^{11}\text{B}\}$  NMR (600 MHz,  $\text{CDCl}_3$ )

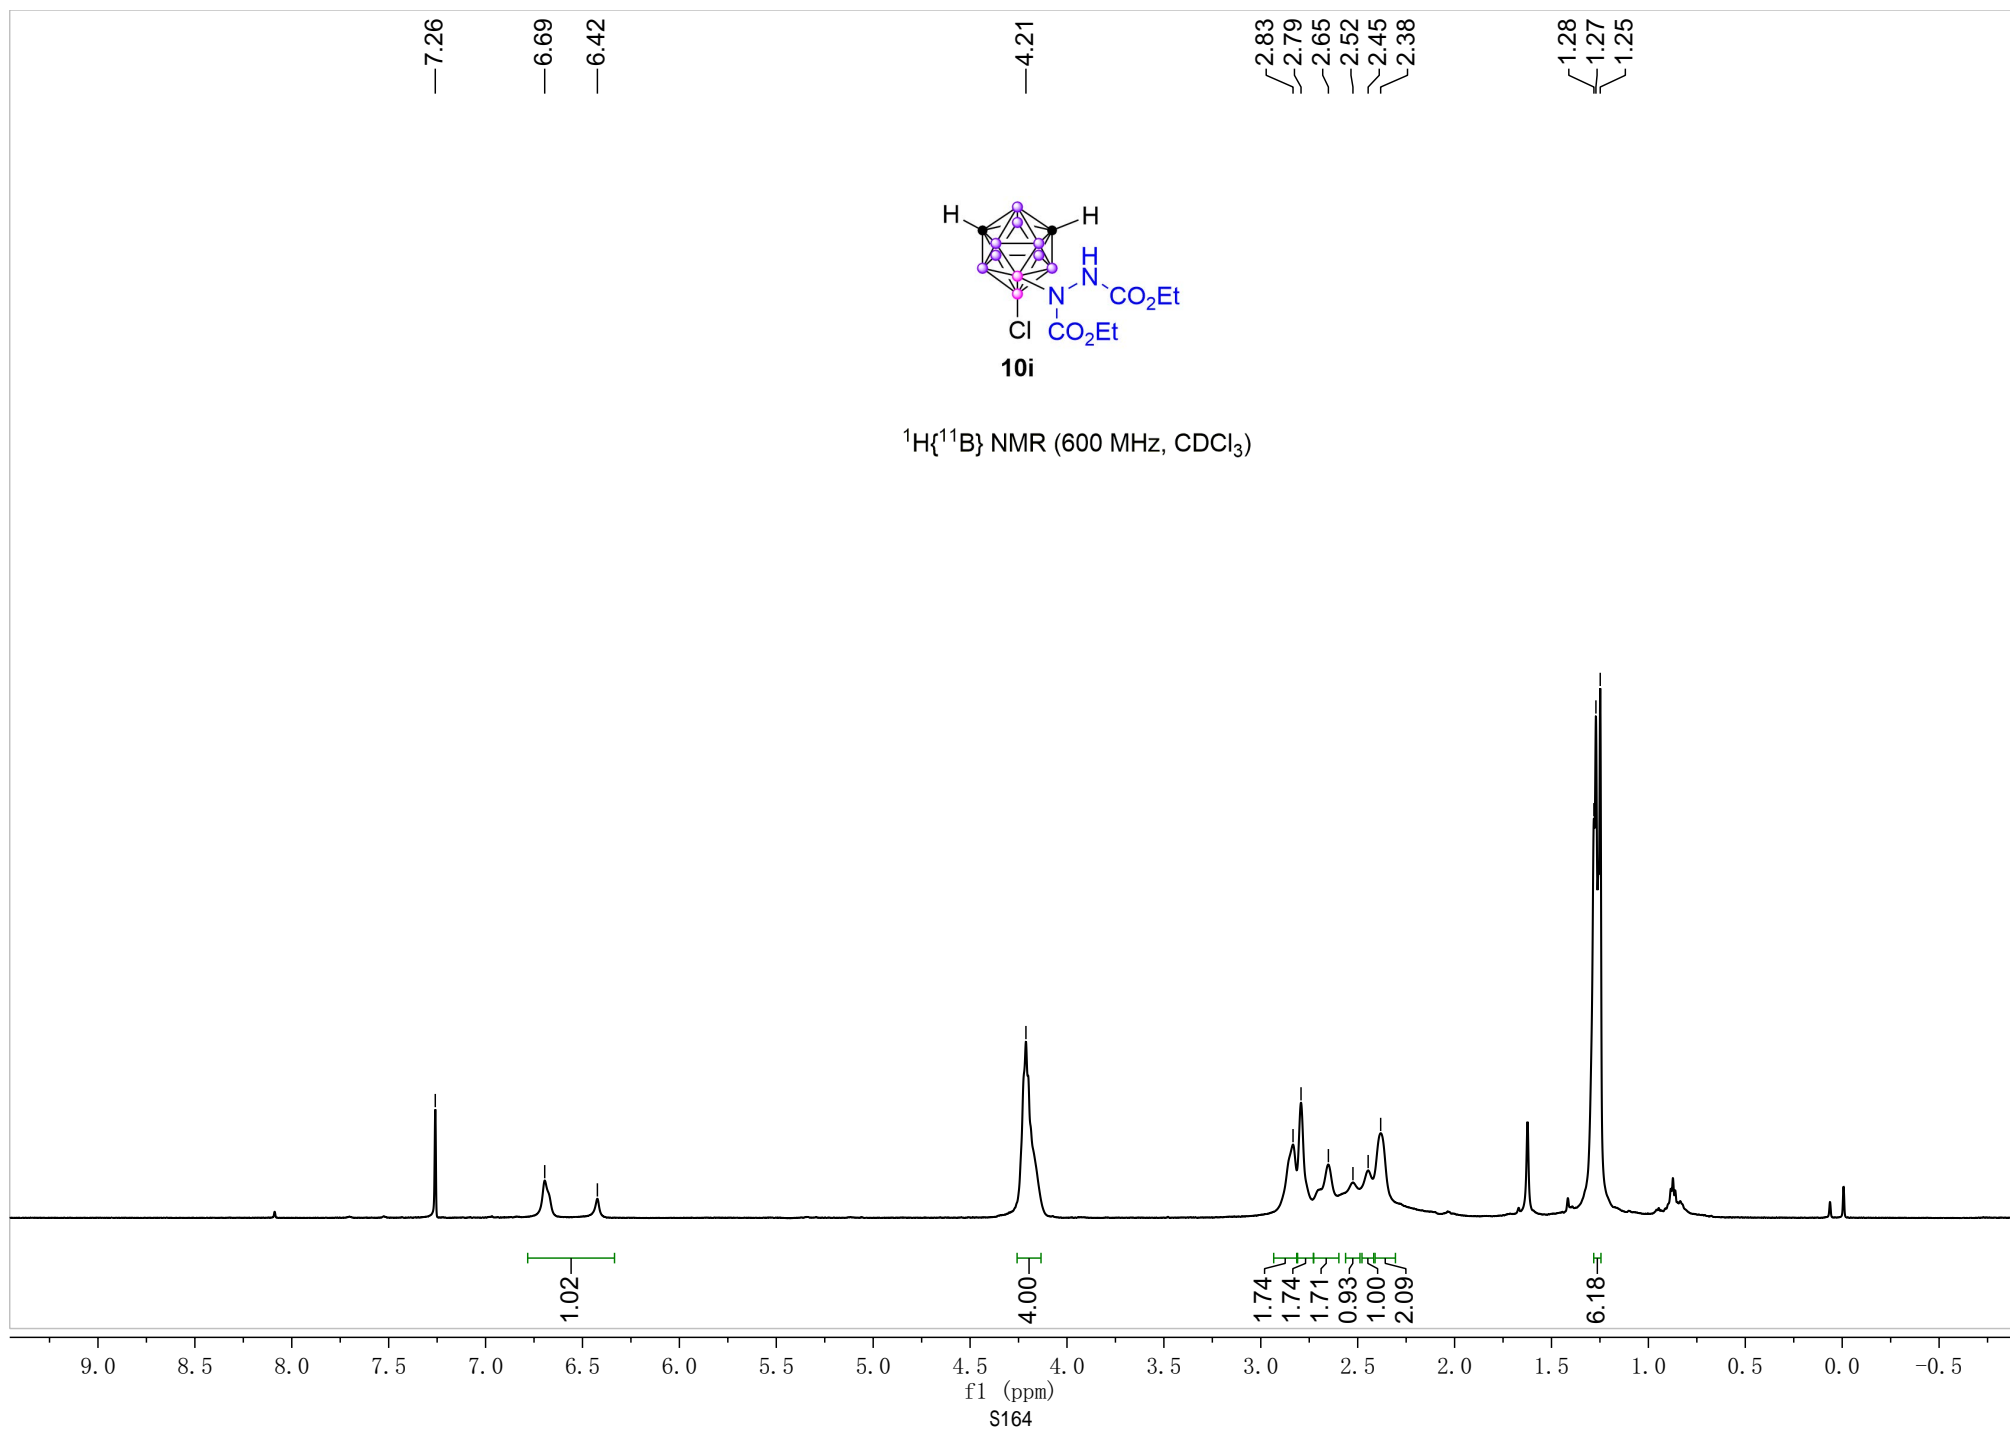

—1.29  
—0.31  
—7.91  
—14.88  
—15.69  
—23.47  
—24.27

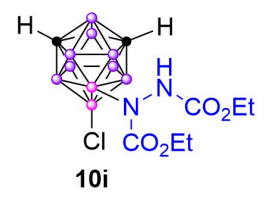

<sup>11</sup>B NMR (193 MHz, CDCl<sub>3</sub>)

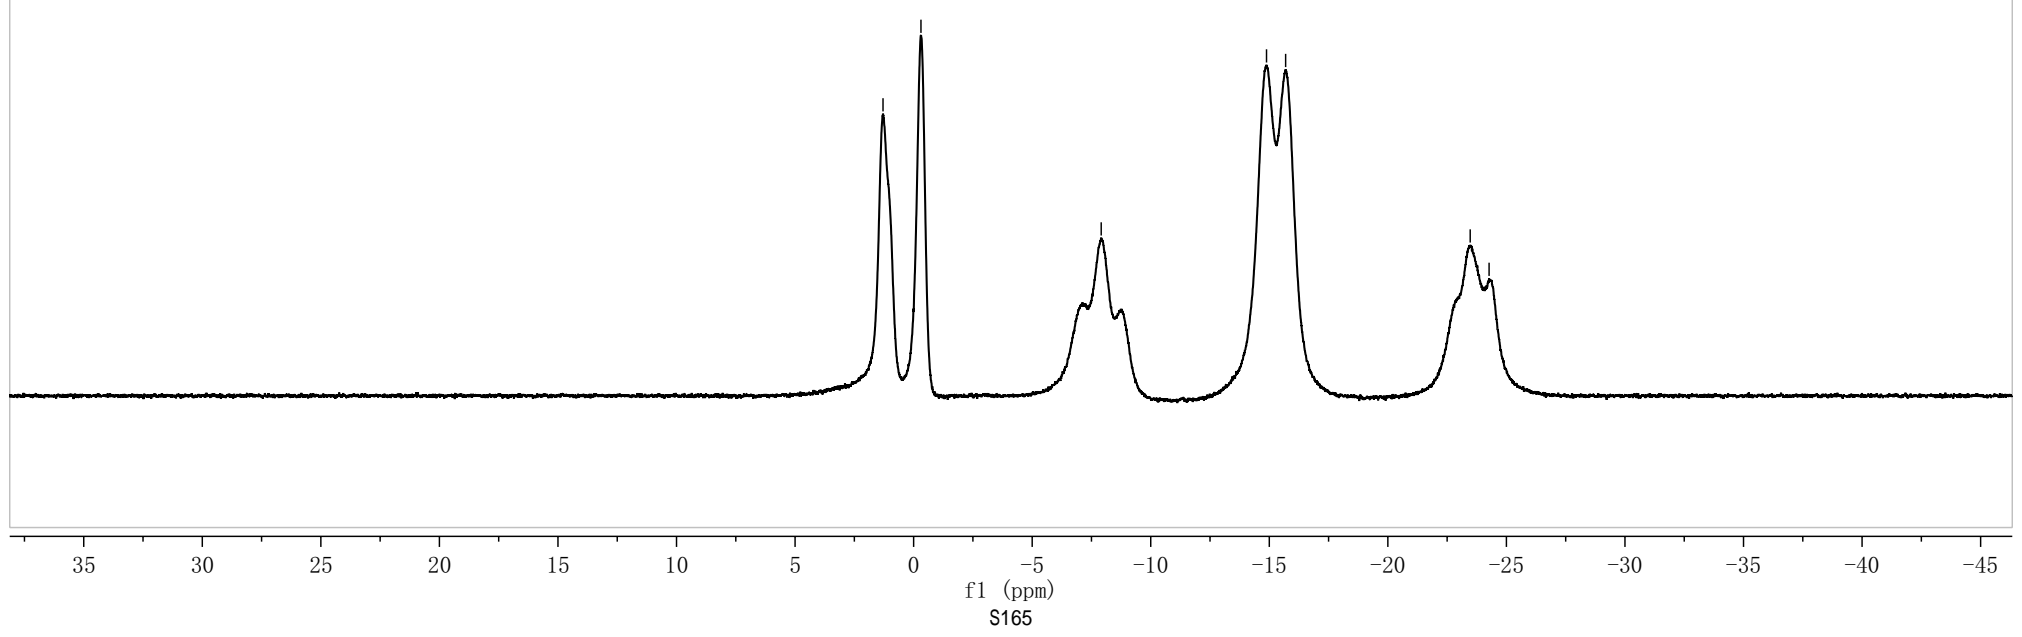

— 1.30  
— -0.29  
— 7.48  
— 8.36  
— -15.34  
— -23.88

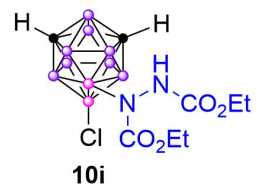

$^{11}\text{B}\{^1\text{H}\}$  NMR (193 MHz,  $\text{CDCl}_3$ )

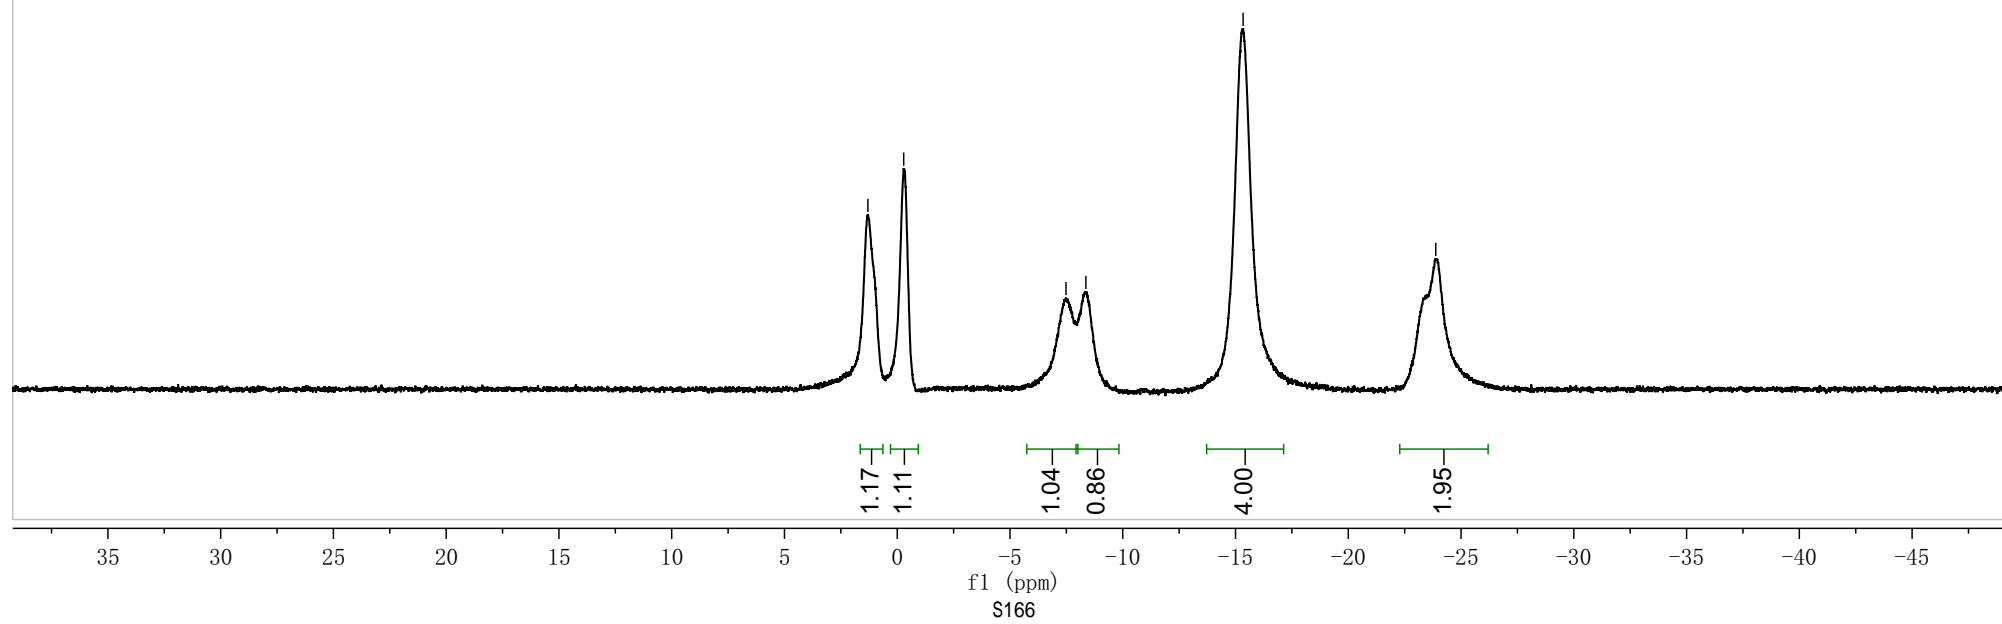



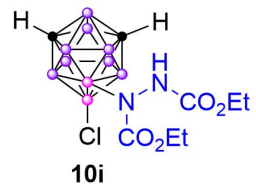

<sup>13</sup>C NMR (151 MHz, CDCl<sub>3</sub>)

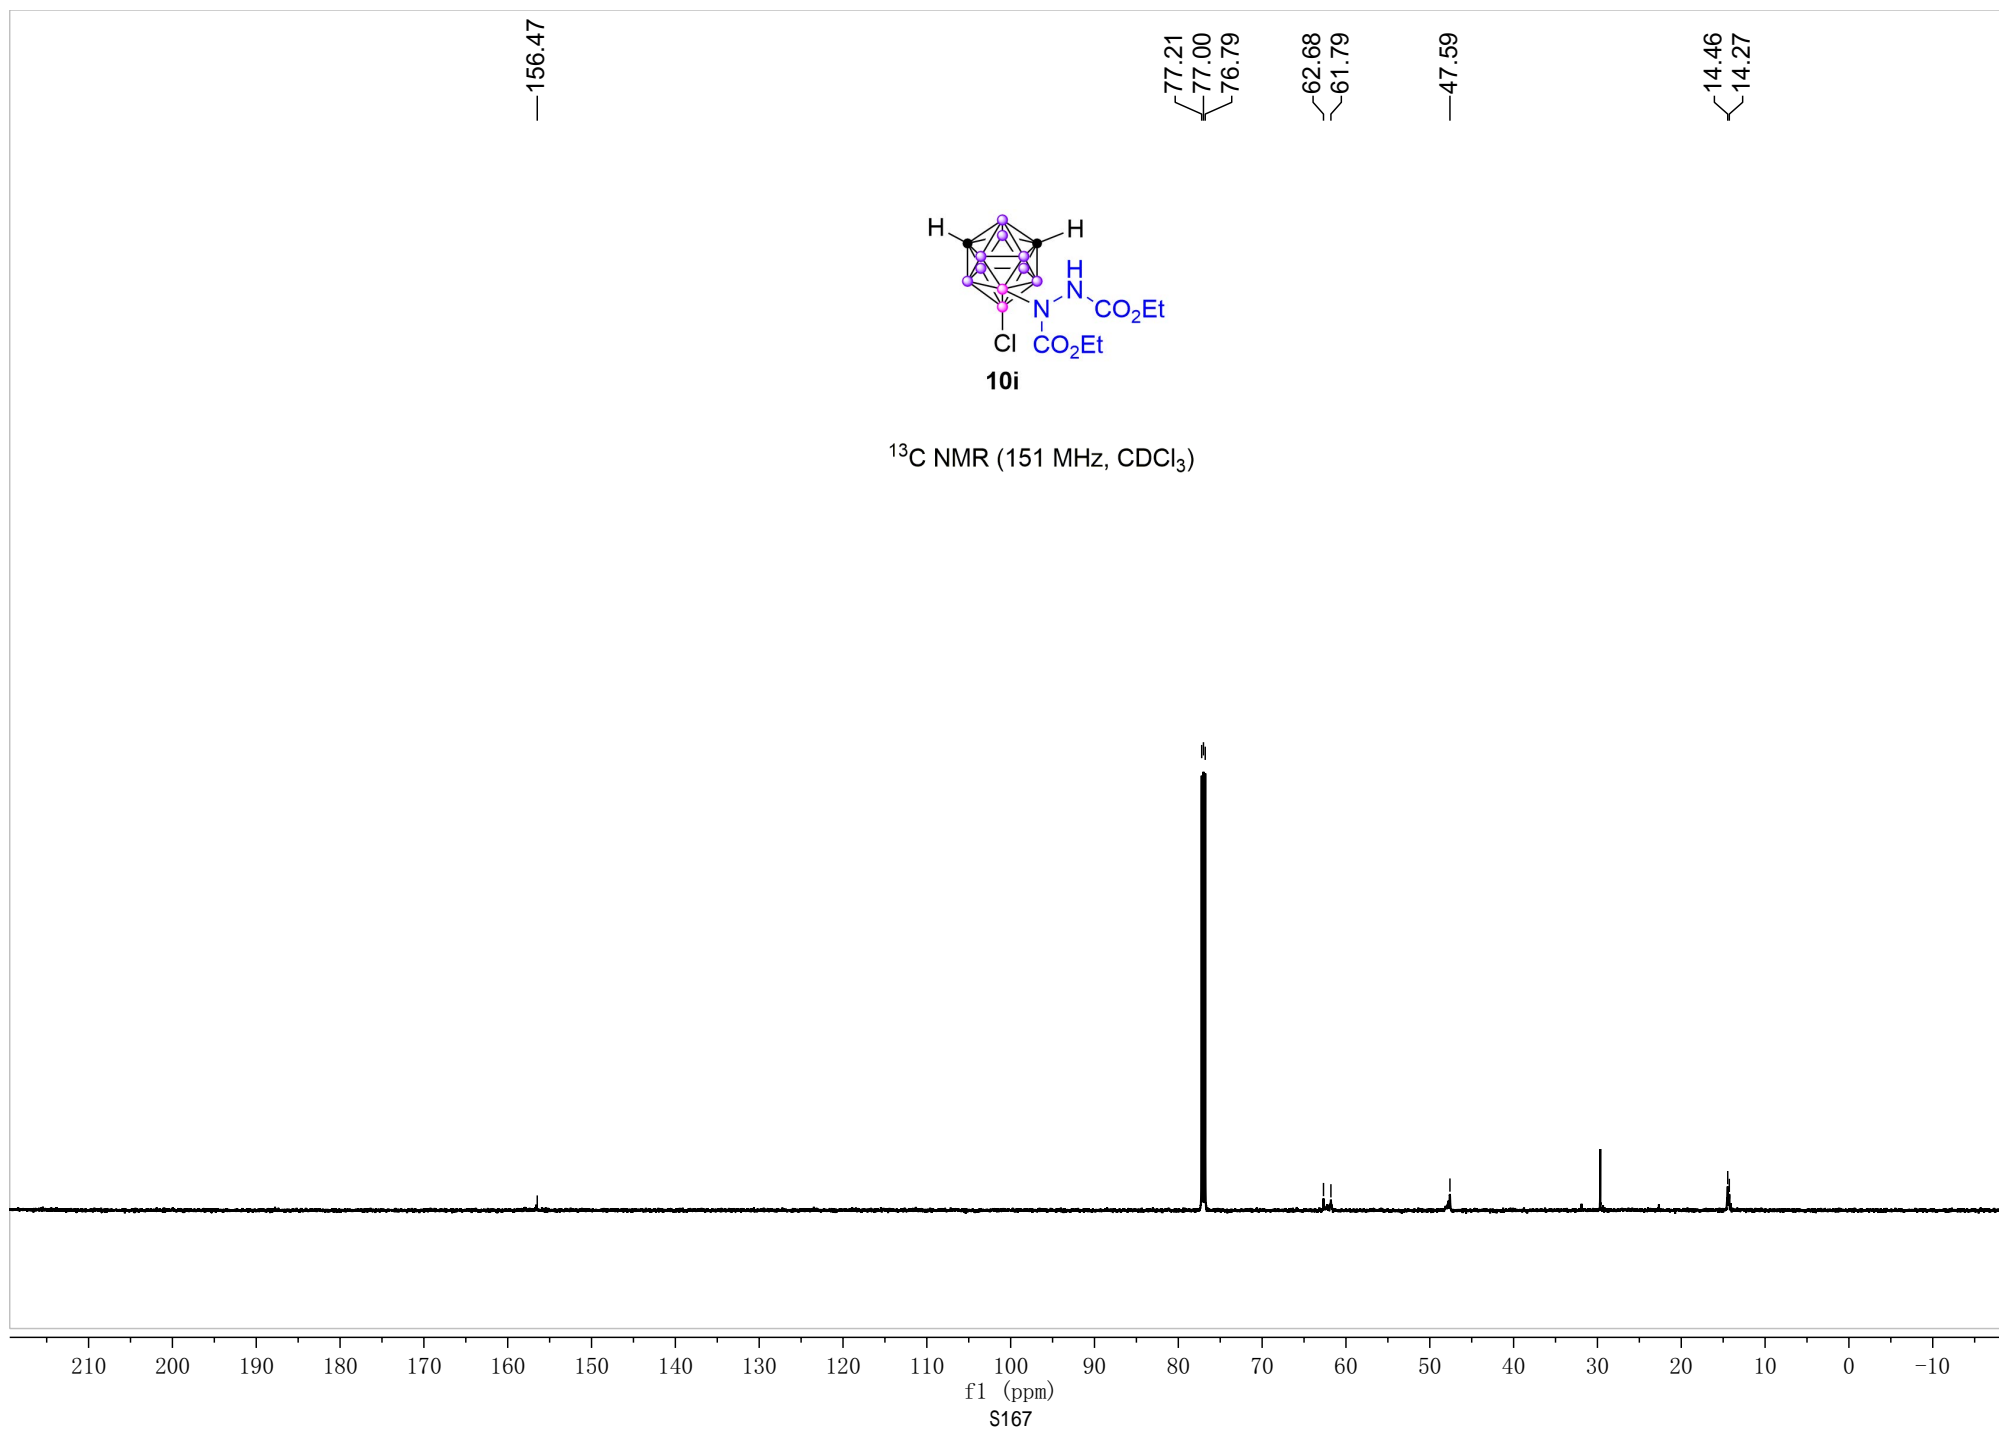

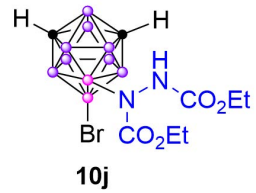

<sup>1</sup>H NMR (600 MHz, CDCl<sub>3</sub>)

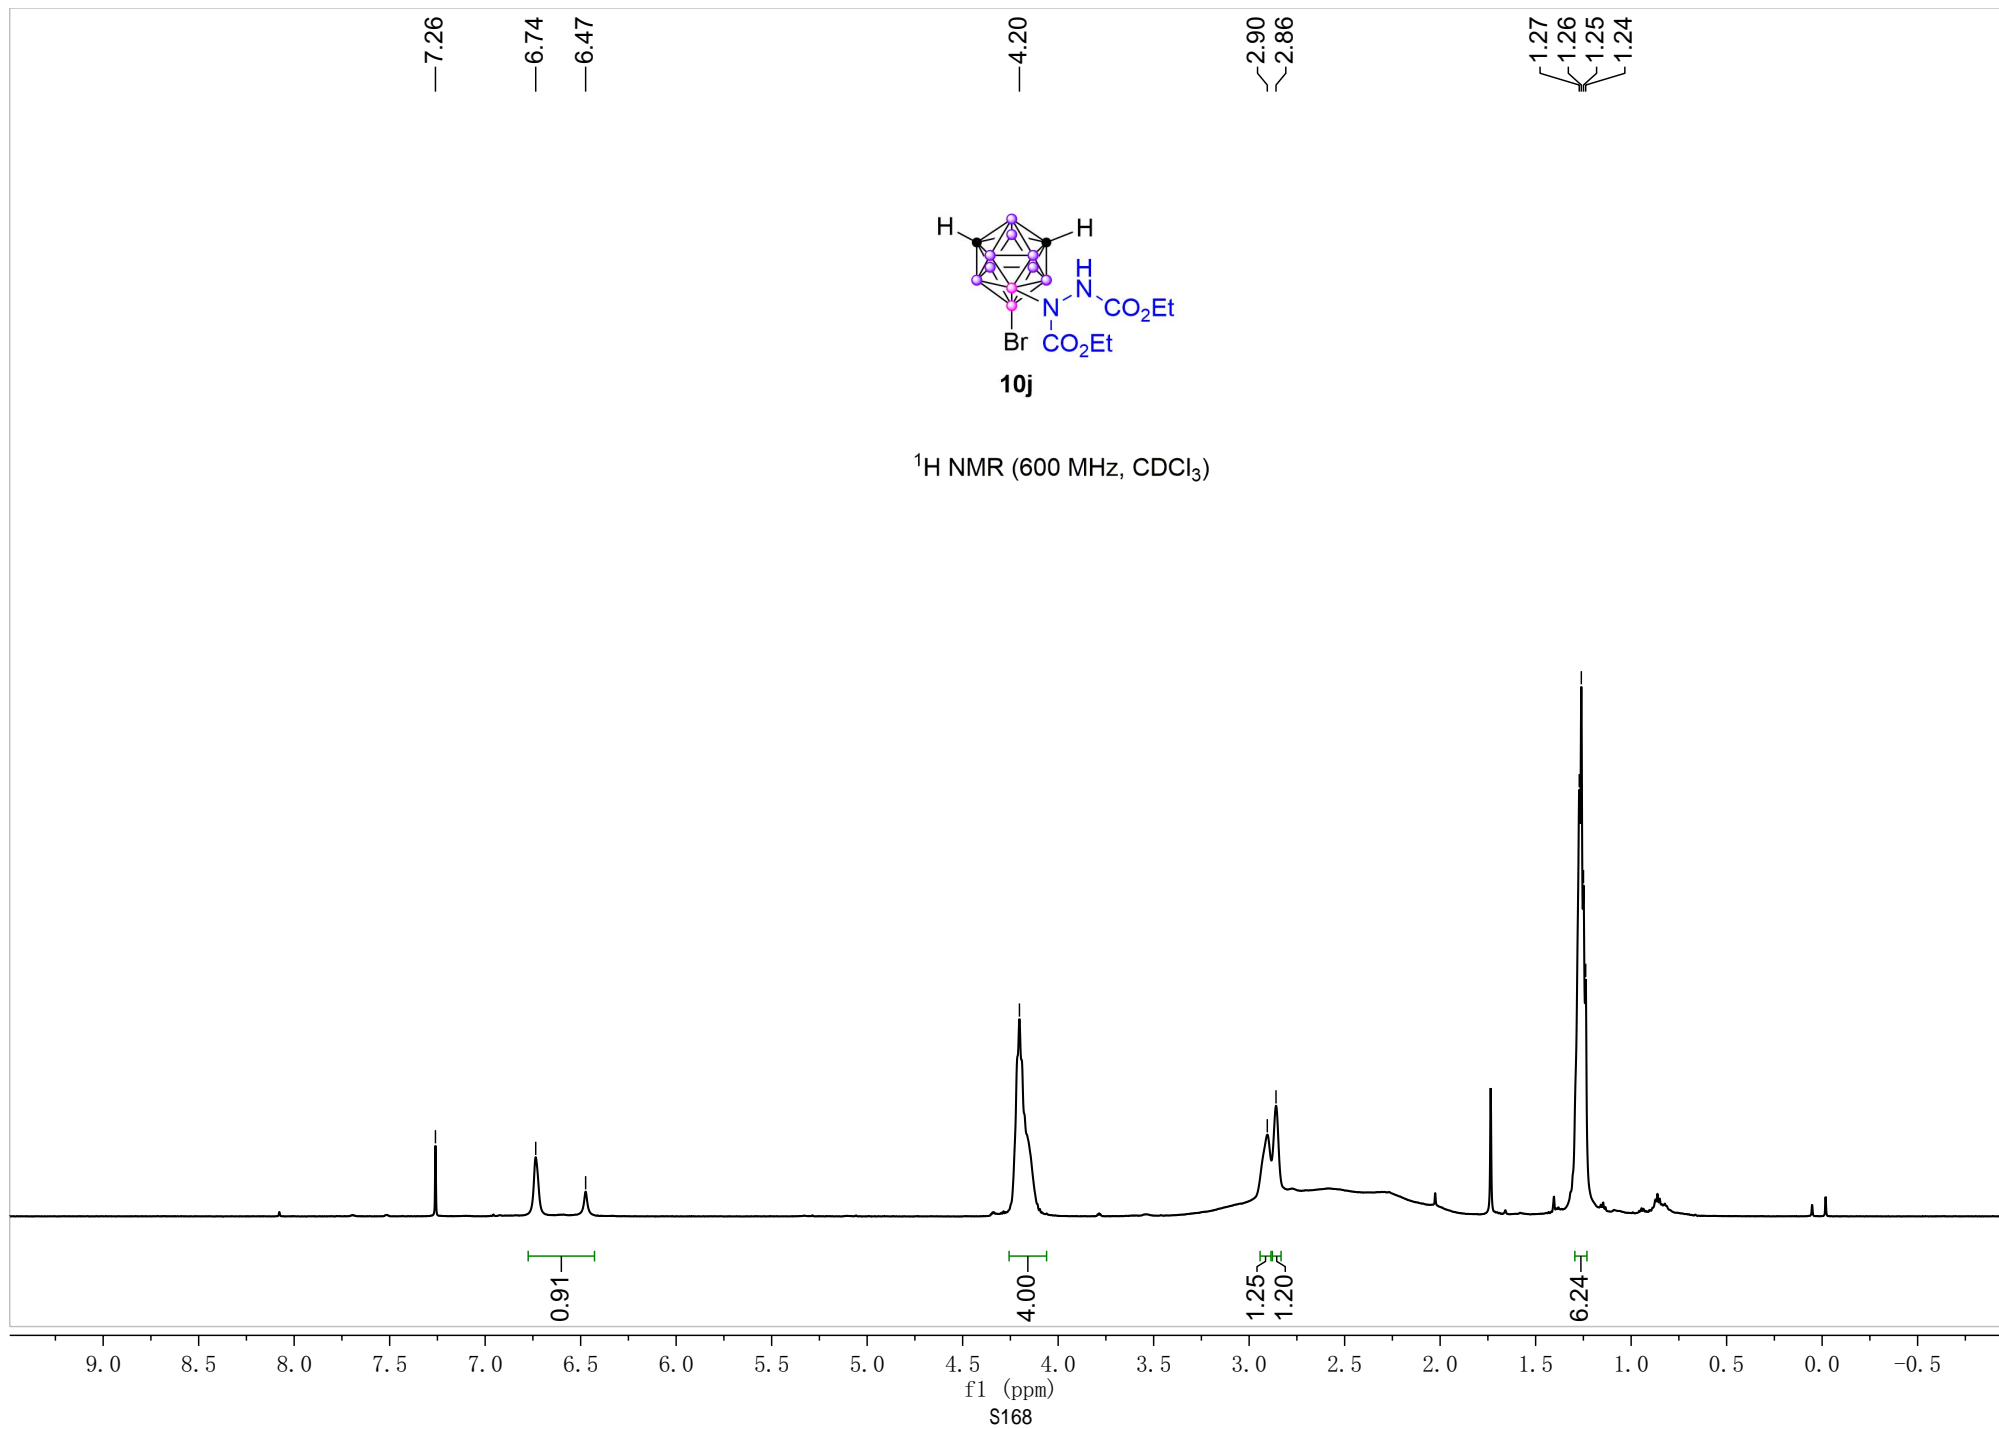

7.26

6.73

6.47

4.20

2.91

2.86

2.82

2.69

2.57

2.48

2.43

1.27

1.26

1.25

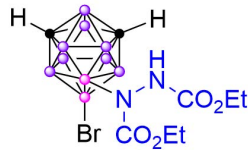

10j

<sup>1</sup>H{<sup>11</sup>B} NMR (600 MHz, CDCl<sub>3</sub>)

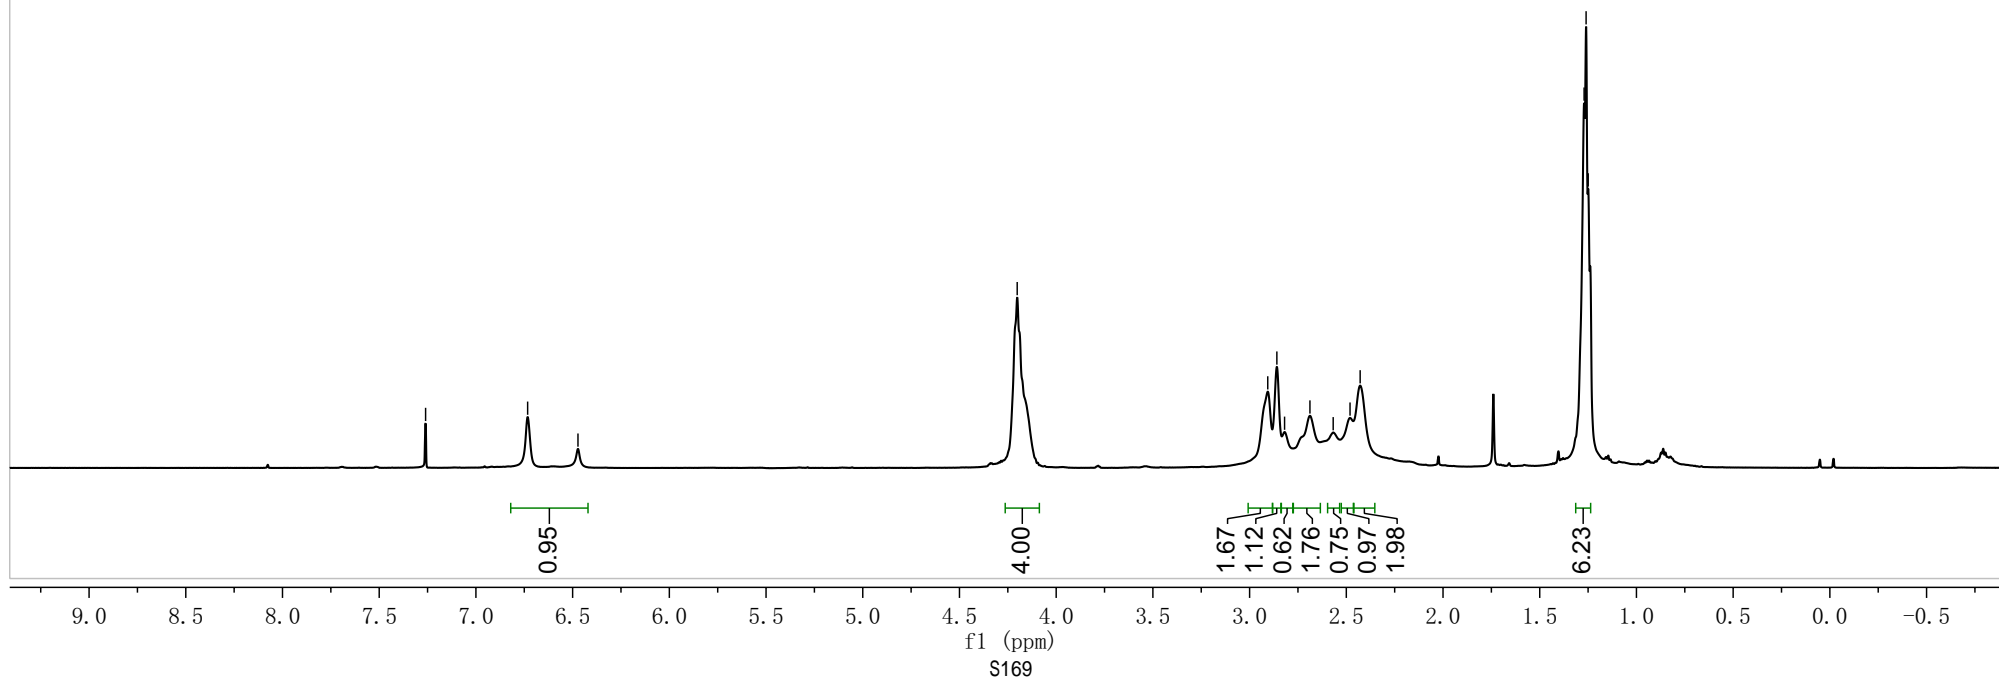

—1.55  
—7.27  
—14.48  
—15.13  
—22.22  
—23.14

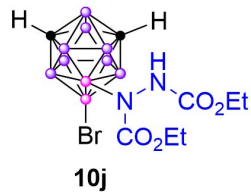

<sup>11</sup>B NMR (193 MHz, CDCl<sub>3</sub>)

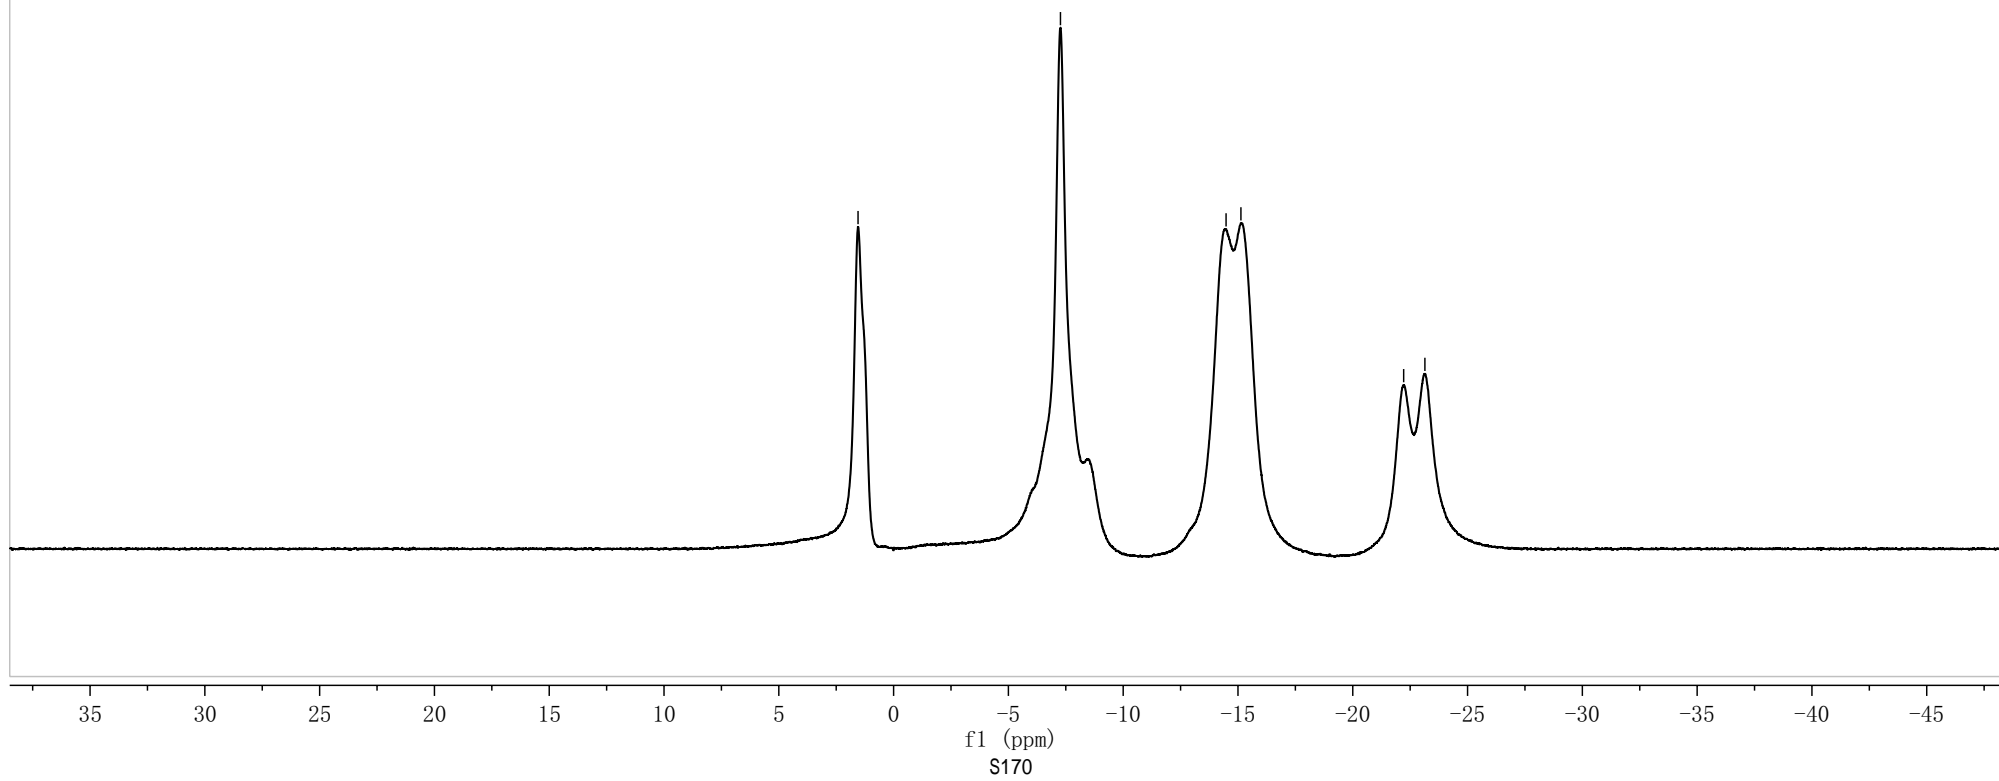

—1.56 —7.22 —14.76 —22.66

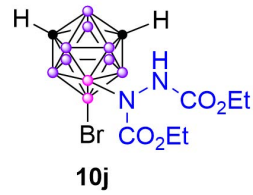

$^{11}\text{B}\{^1\text{H}\}$  NMR (193 MHz,  $\text{CDCl}_3$ )

1.18 2.99 4.00 1.95

f1 (ppm)  
S171

35 30 25 20 15 10 5 0 -5 -10 -15 -20 -25 -30 -35 -40 -45

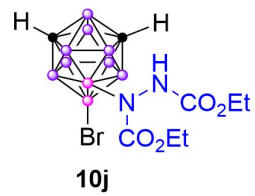

<sup>13</sup>C NMR (151 MHz, CDCl<sub>3</sub>)

157.78  
156.55

77.21  
77.00  
76.79

62.67  
61.75

49.24  
48.94

14.43  
14.24

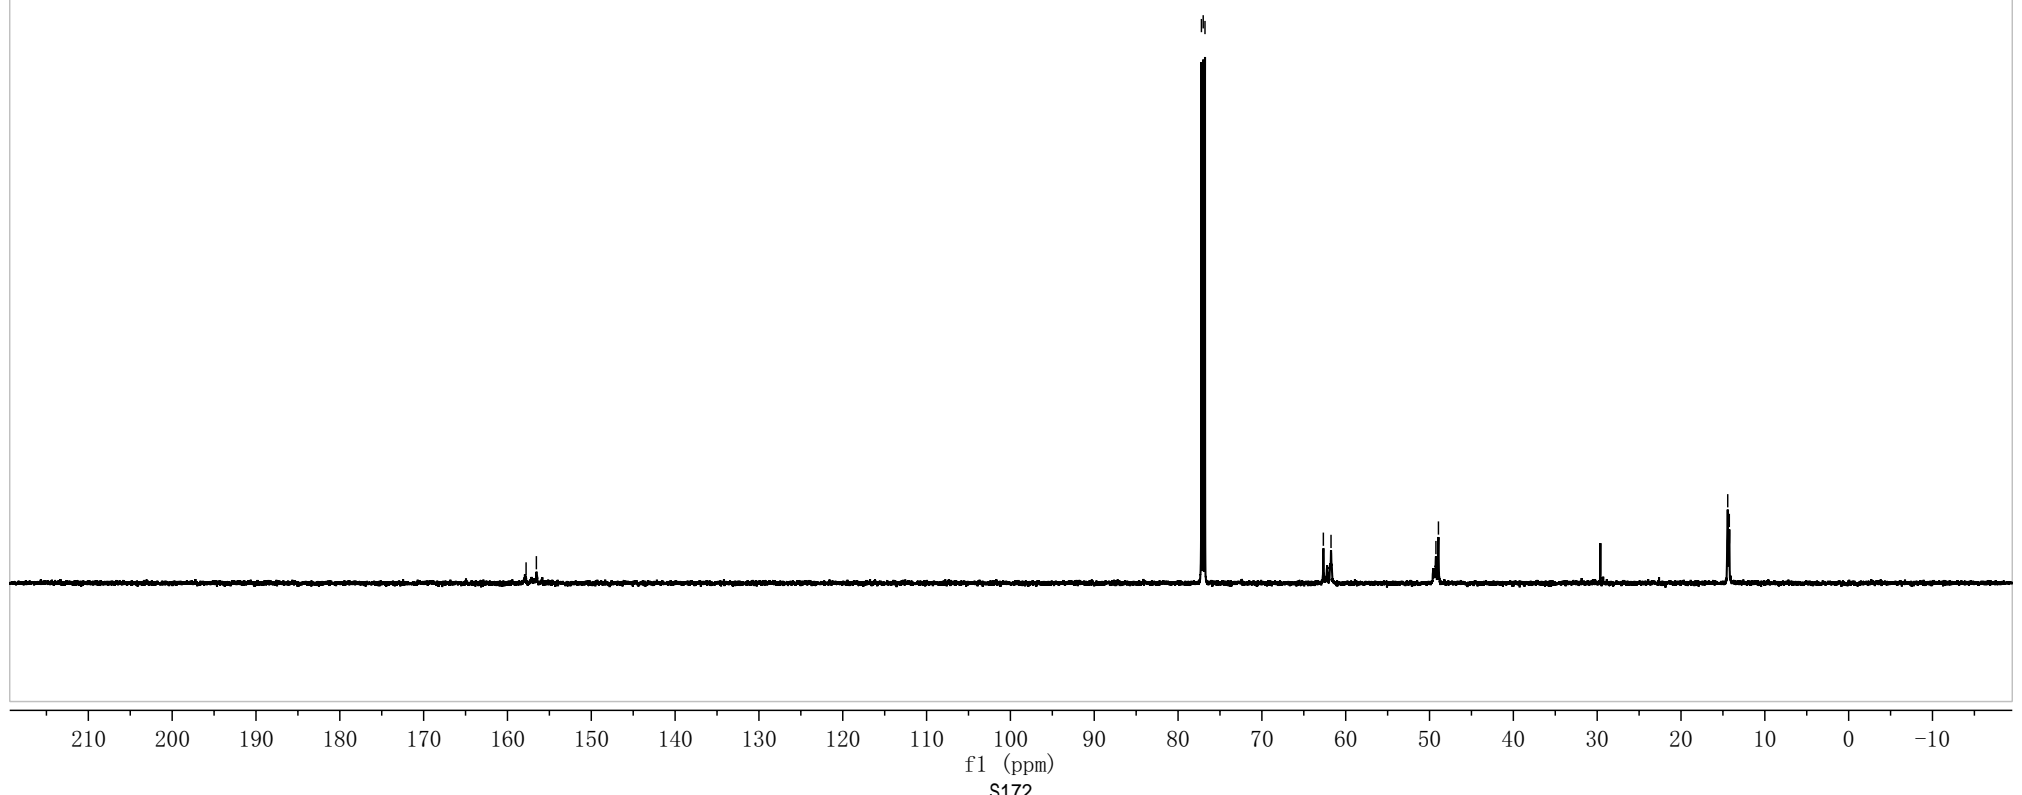

Supplement: d4qo01546k1.pdf [file d4qo01546k1.pdf]
